# Supplementary material for: A Phenotypic Screen Identifies Calcium Overload as a Key Mechanism of β-Cell Glucolipotoxicity
Source: Oxford University Press journal article supplement (doi:10.2337/db19-0813), 2020-02-20
Supplement: db190813-sup-db0813supplementarytable3b.xlsx [file db190813-sup-db0813supplementarytable3b.xlsx]

## Sheet: Supplementary_Table_3B
GeneID	Symbol	GeneName	Nominal p-value	Category
170913	ABCB1	ATP-binding cassette, sub-family B (MDR/TAP), member 1	1.09e-05	ModelA@24hr
25287	ACADL	acyl-CoA dehydrogenase, long chain	4.56e-05	ModelD@24hr
192272	ACOT2	acyl-CoA thioesterase 2	2.09e-06	ModelA@24hr
315939	ACPL2	acid phosphatase-like 2	2.77e-05	ModelA@24hr
308787	ADAMTSL3	ADAMTS-like 3	0.000236328	ModelC@24hr
360887	ADCK3	aarF domain containing kinase 3	1.42e-05	ModelA@24hr
315722	ADPGK	ADP-dependent glucokinase	3.53e-05	ModelA@3hr
502749	AGK	acylglycerol kinase	0.000913958	ModelB@24hr
311833	AK8	adenylate kinase 8	2.36e-05	ModelA@3hr
691416	AKNAD1	AKNA domain containing 1	6.9e-06	ModelA@24hr
291906	AKTIP	AKT interacting protein	5.61e-05	ModelD@24hr
360650	AMZ2	archaelysin family metallopeptidase 2	4.23e-05	ModelA@24hr
362850	ANGPTL4	angiopoietin-like 4	3.34e-05	ModelD@24hr
25291	ANXA3	annexin A3	9.79e-07	ModelA@24hr
362860	APPL2	adaptor protein, phosphotyrosine interaction, PH domain and leucine zipper containing 2	4.49e-05	ModelA@3hr
79121	ARF6	ADP-ribosylation factor 6	1.78e-05	ModelA@24hr
316327	ARID5A	AT rich interactive domain 5A (MRF1-like)	3.33e-05	ModelA@24hr
304900	ASTN1	astrotactin 1	3.02e-05	ModelA@24hr
25389	ATF3	activating transcription factor 3	3.98e-05	ModelA@24hr
25391	ATP2A3	ATPase, Ca++ transporting, ubiquitous	8.87e-06	ModelA@24hr
690038	BAG2	BCL2-associated athanogene 2	2.41e-06	ModelA@24hr
29592	BCAT1	branched chain amino-acid transaminase 1, cytosolic	8.56e-07	ModelA@24hr
117099	BDH1	3-hydroxybutyrate dehydrogenase, type 1	7.2e-06	ModelA@24hr
171439	BZW2	basic leucine zipper and W2 domains 2	2.83e-06	ModelD@24hr
84347	CACNG2	calcium channel, voltage-dependent, gamma subunit 2	4.3e-05	ModelA@24hr
64026	CASP7	caspase 7, apoptosis-related cysteine peptidase	2.27e-05	ModelA@24hr
25298	CCK	cholecystokinin	1.57e-05	ModelA@24hr
25145	Cd24a	CD24a antigen	3.73e-05	ModelA@24hr
500545	CDCA8	cell division cycle associated 8	0.000160645	ModelC@3hr
81741	CDK16	cyclin-dependent kinase 16	4.69e-05	ModelA@3hr
25695	Cebpd	CCAAT/enhancer binding protein (C/EBP), delta	2.54e-05	ModelA@24hr
307859	CHST6	carbohydrate (N-acetylglucosamine 6-O) sulfotransferase 6	2.27e-05	ModelA@24hr
300786	CLPX	ClpX caseinolytic peptidase X homolog (E. coli)	4.32e-05	ModelA@24hr
171393	CLSTN3	calsyntenin 3	2.6e-05	ModelA@3hr
313173	CNTFR	ciliary neurotrophic factor receptor	6.15e-05	ModelD@24hr
353303	COL23A1	collagen, type XXIII, alpha 1	4.28e-06	ModelD@3hr
25757	CPT1A	carnitine palmitoyltransferase 1A (liver)	2.4e-05	ModelD@3hr
363165	CSRNP1	cysteine-serine-rich nuclear protein 1	1.37e-05	ModelA@24hr
24311	DDC	dopa decarboxylase (aromatic L-amino acid decarboxylase)	2.68e-06	ModelA@24hr
295333	DENND2C	DENN/MADD domain containing 2C	9.91e-08	ModelA@24hr
308775	DET1	de-etiolated homolog 1 (Arabidopsis)	5.8e-05	ModelD@3hr
25312	DMP1	dentin matrix acidic phosphoprotein 1	3.93e-05	ModelC@24hr
360481	DNAJA3	DnaJ (Hsp40) homolog, subfamily A, member 3	4.03e-05	ModelD@24hr
314622	Dos	downstream of Stk11	4.33e-05	ModelA@24hr
114856	DUSP1	dual specificity phosphatase 1	5.99e-05	ModelA@3hr
297682	DUSP16	dual specificity phosphatase 16	4.42e-05	ModelA@3hr
498003	DUSP3	dual specificity phosphatase 3	4.51e-05	ModelA@24hr
116663	DUSP6	dual specificity phosphatase 6	1.42e-05	ModelA@24hr
304775	DYRK3	dual-specificity tyrosine-(Y)-phosphorylation regulated kinase 3	1.21e-05	ModelA@24hr
192204	EHD4	EH-domain containing 4	9.17e-07	ModelA@24hr
687694	ELP4	elongator acetyltransferase complex subunit 4	4.73e-05	ModelA@24hr
360468	EMP2	epithelial membrane protein 2	2.75e-05	ModelA@24hr
64017	ENPEP	glutamyl aminopeptidase (aminopeptidase A)	1.51e-05	ModelD@24hr
64467	ENTPD2	ectonucleoside triphosphate diphosphohydrolase 2	2.66e-05	ModelA@24hr
29579	ESYT1	extended synaptotagmin-like protein 1	5.34e-05	ModelA@24hr
303687	EVPL	envoplakin	9.92e-06	ModelA@24hr
366017	EXOSC2	exosome component 2	2.94e-05	ModelA@24hr
500638	FAM110C	family with sequence similarity 110, member C	2.46e-05	ModelA@24hr
365834	FAM160A1	family with sequence similarity 160, member A1	3.77e-05	ModelA@24hr
498257	FAM163A	family with sequence similarity 163, member A	2.18e-05	ModelA@24hr
500931	FAM186B	family with sequence similarity 186, member B	3.41e-09	ModelC@3hr
305830	FBXO34	F-box protein 34	6.36e-05	ModelD@3hr
290639	Fcho1	FCH domain only 1	4.82e-06	ModelA@24hr
54250	FGF2	fibroblast growth factor 2 (basic)	6.01e-05	ModelA@24hr
25445	FOSL1	FOS-like antigen 1	3.03e-05	ModelA@3hr
24373	FST	follistatin	1.13e-05	ModelA@24hr
365823	Fstl5	follistatin-like 5	7.44e-06	ModelA@24hr
25112	GADD45A	growth arrest and DNA-damage-inducible, alpha	4.88e-05	ModelA@24hr
394266	GJB2	gap junction protein, beta 2, 26kDa	5.68e-06	ModelA@24hr
363494	GLA	galactosidase, alpha	1.98e-05	ModelA@24hr
64045	GLRX	glutaredoxin (thioltransferase)	1.01e-05	ModelA@24hr
24957	Glul	glutamate-ammonia ligase	1.43e-05	ModelA@24hr
363143	GNAT1	guanine nucleotide binding protein (G protein), alpha transducing activity polypeptide 1	5.45e-05	ModelA@3hr
362593	GNL2	guanine nucleotide binding protein-like 2 (nucleolar)	4.63e-05	ModelA@24hr
117097	GPR50	G protein-coupled receptor 50	3.15e-07	ModelA@24hr
83683	Gpr6	G protein-coupled receptor 6	3.08e-05	ModelD@24hr
293546	GPRC5B	G protein-coupled receptor, family C, group 5, member B	3.44e-05	ModelA@3hr
24408	GRIN1	glutamate receptor, ionotropic, N-methyl D-aspartate 1	8.09e-07	ModelA@3hr
25433	HBEGF	heparin-binding EGF-like growth factor	3.03e-05	ModelD@24hr
293408	HBS1L	HBS1-like (S. cerevisiae)	4.61e-05	ModelA@24hr
353250	HCAR2	hydroxycarboxylic acid receptor 2	5.66e-05	ModelA@24hr
24450	HMGCS2	3-hydroxy-3-methylglutaryl-CoA synthase 2 (mitochondrial)	8.4e-06	ModelD@24hr
293537	HMX3	H6 family homeobox 3	1.16e-05	ModelA@24hr
25617	HSPA5	heat shock 70kDa protein 5 (glucose-regulated protein, 78kDa)	1.74e-05	ModelA@24hr
404783	HYAL4	hyaluronoglucosaminidase 4	7.96e-06	ModelA@24hr
155140	IL23A	interleukin 23, alpha subunit p19	6.43e-08	ModelA@24hr
306657	IRX2	iroquois homeobox 2	0.000143584	ModelB@3hr
308451	ITPKC	inositol-trisphosphate 3-kinase C	3.08e-06	ModelA@3hr
316328	KANSL3	KAT8 regulatory NSL complex subunit 3	4.7e-05	ModelD@3hr
65198	KCNH1	potassium voltage-gated channel, subfamily H (eag-related), member 1	1.64e-05	ModelA@3hr
114032	KCNH4	potassium voltage-gated channel, subfamily H (eag-related), member 4	3.79e-05	ModelD@3hr
59324	KCNK1	potassium channel, subfamily K, member 1	3.01e-05	ModelA@24hr
54262	KCNN2	potassium intermediate/small conductance calcium-activated channel, subfamily N, member 2	2.34e-05	ModelA@3hr
309523	KIF20B	kinesin family member 20B	7.36e-05	ModelM@3hr
313994	KLF11	Kruppel-like factor 11	4.46e-05	ModelD@3hr
114505	KLF4	Kruppel-like factor 4 (gut)	2.72e-06	ModelA@24hr
116682	KYNU	kynureninase	5.43e-05	ModelA@24hr
24534	LDHB	lactate dehydrogenase B	2.68e-05	ModelA@24hr
65161	LITAF	lipopolysaccharide-induced TNF factor	2.54e-05	ModelA@24hr
366463	LOC100361036/Oxct2a	3-oxoacid CoA transferase 2A	8.51e-06	ModelA@3hr
299282	LOC299282	Serine protease inhibitor	8.25e-06	ModelM@24hr
498155	LOC498155	LRRGT00167	8.95e-14	ModelC@24hr
298322	LONRF3	LON peptidase N-terminal domain and ring finger 3	2.14e-05	ModelA@24hr
361467	LPCAT1	lysophosphatidylcholine acyltransferase 1	2.67e-06	ModelA@24hr
361041	LRRC16B	leucine rich repeat containing 16B	3.24e-06	ModelA@24hr
311171	LRRC55	leucine rich repeat containing 55	2.58e-06	ModelM@24hr
299920	LRRC6	leucine rich repeat containing 6	3.95e-05	ModelD@3hr
679668	LRRTM1	leucine rich repeat transmembrane neuronal 1	5.43e-05	ModelA@3hr
54264	MAFB	v-maf musculoaponeurotic fibrosarcoma oncogene homolog B (avian)	9.78e-06	ModelD@3hr
84469	MAGED1	melanoma antigen family D, 1	1.56e-05	ModelA@24hr
294410	MAN1A1	mannosidase, alpha, class 1A, member 1	6.76e-05	ModelM@24hr
294972	MCCC1	methylcrotonoyl-CoA carboxylase 1 (alpha)	1.44e-05	ModelD@24hr
304301	MMD2	monocyte to macrophage differentiation-associated 2	4.04e-05	ModelA@24hr
171052	MMP13	matrix metallopeptidase 13 (collagenase 3)	4.32e-05	ModelM@24hr
363261	Mogat1	monoacylglycerol O-acyltransferase 1	4.32e-05	ModelA@24hr
25482	MRAS	muscle RAS oncogene homolog	2.42e-06	ModelA@24hr
293739	MS4A10	membrane-spanning 4-domains, subfamily A, member 10	3.41e-09	ModelC@3hr
298894	MYCN	v-myc myelocytomatosis viral related oncogene, neuroblastoma derived (avian)	3.83e-05	ModelA@24hr
81733	NELL1	NEL-like 1 (chicken)	5.68e-05	ModelA@24hr
302976	NOXO1	NADPH oxidase organizer 1	5.75e-05	ModelB@3hr
81005	NPTXR	neuronal pentraxin receptor	1.33e-06	ModelA@24hr
54278	NR4A2	nuclear receptor subfamily 4, group A, member 2	5.27e-05	ModelA@3hr
494199	Oas1f	2-5 oligoadenylate synthetase 1F	3.58e-05	ModelA@24hr
25231	ONECUT1	one cut homeobox 1	4.53e-05	ModelD@24hr
307799	PARD6A	par-6 partitioning defective 6 homolog alpha (C. elegans)	5.23e-06	ModelA@3hr
315760	PARP16	poly (ADP-ribose) polymerase family, member 16	1.87e-05	ModelA@24hr
311944	PAXIP1	PAX interacting (with transcription-activation domain) protein 1	6.5e-05	ModelM@24hr
25507	PCSK6	proprotein convertase subtilisin/kexin type 6	4.71e-05	ModelA@24hr
79429	PDGFC	platelet derived growth factor C	1.9e-05	ModelM@24hr
312703	PEX5	peroxisomal biogenesis factor 5	1.02e-05	ModelA@3hr
65052	PIK3C3	phosphatidylinositol 3-kinase, catalytic subunit type 3	2.38e-05	ModelA@3hr
24678	PKIB	protein kinase (cAMP-dependent, catalytic) inhibitor beta	2.12e-05	ModelA@24hr
25692	PLAT	plasminogen activator, tissue	2.94e-06	ModelA@24hr
298199	PLIN2	perilipin 2	1.34e-05	ModelD@24hr
117540	PLSCR1	phospholipid scramblase 1	4.92e-05	ModelA@24hr
303505	PLXDC1	plexin domain containing 1	2.79e-05	ModelA@24hr
64369	PPAP2A	phosphatidic acid phosphatase type 2A	2.9e-05	ModelA@24hr
192205	PROK1	prokineticin 1	3.51e-05	ModelC@24hr
29644	Ptpn5	protein tyrosine phosphatase, non-receptor type 5	2.99e-05	ModelA@24hr
29616	PTPRM	protein tyrosine phosphatase, receptor type, M	1.59e-05	ModelA@24hr
25066	Pvr	poliovirus receptor	5e-06	ModelA@24hr
64455	RASD1	RAS, dexamethasone-induced 1	4.23e-05	ModelA@3hr
288771	RBMS2	RNA binding motif, single stranded interacting protein 2	2.77e-05	ModelA@3hr
445583	REG4	regenerating islet-derived family, member 4	8.95e-14	ModelC@24hr
294395	RFX6	regulatory factor X, 6	3.42e-06	ModelA@24hr
289309	RGD1559696	similar to kinesin-like protein (103.5 kD) (klp-6)	1.74e-05	ModelA@3hr
54292	RGS12	regulator of G-protein signaling 12	3.86e-05	ModelD@3hr
84583	RGS2	regulator of G-protein signaling 2, 24kDa	2.91e-06	ModelA@24hr
308516	RHPN2	rhophilin, Rho GTPase binding protein 2	5.14e-05	ModelA@3hr
685384	RNF180	ring finger protein 180	1.77e-05	ModelA@3hr
309288	RORB	RAR-related orphan receptor B	5.15e-05	ModelA@24hr
305854	SALL2	sal-like 2 (Drosophila)	8.14e-06	ModelA@24hr
316164	SATB1	SATB homeobox 1	5.66e-05	ModelA@24hr
306942	SCGN	secretagogin, EF-hand calcium binding protein	3.27e-05	ModelA@24hr
24794	Serpina3k (includes others)	serine (or cysteine) peptidase inhibitor, clade A, member 3K	5.24e-05	ModelA@24hr
117855	SF1	splicing factor 1	6.89e-05	ModelD@3hr
114634	SIX1	SIX homeobox 1	8.95e-14	ModelC@24hr
84487	SLC17A6	solute carrier family 17 (sodium-dependent inorganic phosphate cotransporter), member 6	1e-05	ModelA@24hr
246771	SLC25A25	solute carrier family 25 (mitochondrial carrier; phosphate carrier), member 25	3.37e-05	ModelA@24hr
100158233	SLC35A2	solute carrier family 35 (UDP-galactose transporter), member A2	4.8e-05	ModelA@24hr
311204	SLC35C1	solute carrier family 35, member C1	1.69e-07	ModelA@24hr
50719	SLC7A5	solute carrier family 7 (amino acid transporter light chain, L system), member 5	5.62e-05	ModelA@3hr
494346	Slmo2	slowmo homolog 2 (Drosophila)	5.06e-05	ModelA@24hr
298500	SMAP2	small ArfGAP2	2.24e-06	ModelA@24hr
305438	SORCS2	sortilin-related VPS10 domain containing receptor 2	4.07e-05	ModelA@24hr
84046	SOX11	SRY (sex determining region Y)-box 11	4.36e-05	ModelA@24hr
83623	SPAG4	sperm associated antigen 4	3.5e-06	ModelA@3hr
361319	SPINK5	serine peptidase inhibitor, Kazal type 5	1.69e-05	ModelA@24hr
296271	SRXN1	sulfiredoxin 1	2.42e-05	ModelD@24hr
360953	STX18	syntaxin 18	6.29e-06	ModelA@24hr
24806	TAC1	tachykinin, precursor 1	4.09e-06	ModelA@24hr
294018	TAF5	TAF5 RNA polymerase II, TATA box binding protein (TBP)-associated factor, 100kDa	5e-05	ModelD@24hr
300470	THYN1	thymocyte nuclear protein 1	1.06e-05	ModelA@3hr
361744	TMEM252	transmembrane protein 252	2.08e-05	ModelA@3hr
290796	TMEM66	transmembrane protein 66	3.05e-05	ModelA@24hr
691982	TMEM95	transmembrane protein 95	6.88e-05	ModelD@3hr
311854	TOR1B	torsin family 1, member B (torsin B)	4.26e-05	ModelD@24hr
362272	TP53RK	TP53 regulating kinase	6.07e-05	ModelA@3hr
365391	TRPM5	transient receptor potential cation channel, subfamily M, member 5	5.06e-08	ModelA@24hr
114246	TRPV6	transient receptor potential cation channel, subfamily V, member 6	1.18e-05	ModelA@3hr
500689	TTC9	tetratricopeptide repeat domain 9	3.67e-05	ModelA@24hr
302899	TXNDC11	thioredoxin domain containing 11	6.93e-05	ModelD@3hr
296603	VAV2	vav 2 guanine nucleotide exchange factor	3.75e-05	ModelA@24hr
314442	WARS	tryptophanyl-tRNA synthetase	5.57e-05	ModelA@24hr
312560	XPC	xeroderma pigmentosum, complementation group C	1.53e-05	ModelA@24hr
309613	ZBTB12	zinc finger and BTB domain containing 12	2.28e-05	ModelD@24hr
365252	ZDHHC13	zinc finger, DHHC-type containing 13	0.00021504	ModelC@24hr
171090	Zfp932 (includes others)	zinc finger protein 932	1.92e-05	ModelA@24hr
499095	Zfp94	zinc finger protein 94	1.63e-06	ModelA@24hr
363059	ZW10	zw10 kinetochore protein	2.65e-05	ModelA@24hr

## Sheet: Summary
	GLT impacted genes @ 3hr	GLT impacted genes @ 24hr
Total	50	140
Reversed by compound D	31	109
% reversed by compound D	31/50= 62%	109/140=78%
