# Supplementary material for: A Phenotypic Screen Identifies Calcium Overload as a Key Mechanism of β-Cell Glucolipotoxicity
Source: Oxford University Press journal article supplement (doi:10.2337/db19-0813), 2020-02-20
Supplement: db190813-sup-db0813supplementarytable4.xlsx [file db190813-sup-db0813supplementarytable4.xlsx]

## Sheet: ModelDescription
Model	Description	Comparison (groups aggregated before comparison)
Model M	Glucolipotoxicity vs control condition	GLT vs Control
Model A	Reversal of GLT induced genes by compound D	GLT/GLT+CpdE vs Ctrl/GLT+CpdD
Model B	Reversal of GLT induced genes by compound E	GLT/GLT+CpdD vs Ctrl/GLT+CpdE
Model C	Reversal of GLT induced genes by both compound D and E	GLT vs Ctrl/GLT+CpdE/GLT+CpdD
Model D	GLT induced gene not reversed by Cpd D or Cpd E	GLT/GLT+CpdD/GLT+CpdE vs Ctrl
fdr: false discovery rate

## Sheet: ColumnHeaderDescription
ColumnHeader	Description
GeneID	Gene Identifier from NCBI
Symbol	Gene symbol
GeneName	Full Gene Name
p.ModelM.3hr	p value of model M@3hr
fdr.ModelM.3hr	fdr value of model M@3hr
log2fold.ModelM.3hr	log2 fold change of model M@3hr
p.ModelM.24hr	p value of model M@24hr
fdr.ModelM.24hr	fdr value of model M@24hr
log2fold.ModelM.24hr	log2 fold change of model M@24hr
p.ModelA.3hr	p value of model A@3hr
fdr.ModelA.3hr	fdr value of model A@3hr
log2fold.ModelA.3hr	log2 fold change of model A@3hr
p.ModelA.24hr	p value of model A@24hr
fdr.ModelA.24hr	fdr value of model A@24hr
log2fold.ModelA.24hr	log2 fold change of model A@24hr
p.ModelB.3hr	p value of model B@3hr
fdr.ModelB.3hr	fdr value of model B@3hr
log2fold.ModelB.3hr	log2 fold change of model B@3hr
p.ModelB.24hr	p value of model B@24hr
fdr.ModelB.24hr	fdr value of model B@24hr
log2fold.ModelB.24hr	log2 fold change of model B@24hr
p.ModelC.3hr	p value of model C@3hr
fdr.ModelC.3hr	fdr value of model C@3hr
log2fold.ModelC.3hr	log2 fold change of model C@3hr
p.ModelC.24hr	p value of model C@24hr
fdr.ModelC.24hr	fdr value of model C@24hr
log2fold.ModelC.24hr	log2 fold change of model C@24hr
p.ModelD.3hr	p value of model D@3hr
fdr.ModelD.3hr	fdr value of model D@3hr
log2fold.ModelD.3hr	log2 fold change of model D@3hr
p.ModelD.24hr	p value of model D@24hr
fdr.ModelD.24hr	fdr value of model D@24hr
log2fold.ModelD.24hr	log2 fold change of model D@24hr
fdr: false discovery rate based on Benjamini-Hochberg procedure

## Sheet: Results_allGenes
GeneID	Symbol	GeneName	p.ModelM.3hr	fdr.ModelM.3hr	log2fold.ModelM.3hr	p.ModelM.24hr	fdr.ModelM.24hr	log2fold.ModelM.24hr	p.ModelA.3hr	fdr.ModelA.3hr	log2fold.ModelA.3hr	p.ModelA.24hr	fdr.ModelA.24hr	log2fold.ModelA.24hr	p.ModelB.3hr	fdr.ModelB.3hr	log2fold.ModelB.3hr	p.ModelB.24hr	fdr.ModelB.24hr	log2fold.ModelB.24hr	p.ModelC.3hr	fdr.ModelC.3hr	log2fold.ModelC.3hr	p.ModelC.24hr	fdr.ModelC.24hr	log2fold.ModelC.24hr	p.ModelD.3hr	fdr.ModelD.3hr	log2fold.ModelD.3hr	p.ModelD.24hr	fdr.ModelD.24hr	log2fold.ModelD.24hr
140656	A1BG	alpha-1-B glycoprotein	0.110673	0.644353	-0.30936	0.45105	0.733307	-0.128133	0.360369	0.767712	-0.146891	0.118047	0.453291	-0.510759	0.0110337	0.721469	-0.285564	0.288609	1	0.367508	0.0835006	0.648671	-0.219857	0.175966	0.836735	-0.442063	0.0828803	0.490197	-0.233655	0.415313	0.828582	0.266179
170912	A1CF	APOBEC1 complementation factor	0.200118	0.708548	-0.631842	0.0692019	0.353287	-0.60479	0.085039	0.429992	-0.546923	0.465646	0.824663	-0.486081	0.427475	0.962785	-0.267531	0.845189	1	-0.257591	0.197183	0.739204	-0.464057	0.625919	1	0.316867	0.178286	0.621694	-0.43927	0.109514	0.499604	-1.16955
297568	Mug1/Mug2	murinoglobulin 1	0.301459	0.792437	0.395111	0.48659	0.768063	0.295496	0.188635	0.589309	0.250572	0.341996	0.734022	0.249633	0.231661	0.851357	0.244261	0.943343	1	0.1109	0.23825	0.770344	0.253485	0.604967	1	-0.166073	0.126437	0.564287	0.30657	0.0791864	0.465616	0.581746
24153	A2M	alpha-2-macroglobulin	0.472612	0.873702	-0.177515	0.772826	1	-0.237175	0.976009	1	0.0255667	0.963861	1	0.0299469	0.266192	0.862984	-0.267643	0.464828	1	-0.383099	0.955127	1	0.0211874	0.825024	1	0.0839917	0.221952	0.684629	-0.279395	0.322368	0.756612	-0.438884
171553	A3galt2	alpha 1,3-galactosyltransferase 2 (isoglobotriaosylceramide synthase)	0.183325	0.69949	-0.316644	0.467878	0.749939	0.180407	0.526048	0.891225	-0.119541	0.0217169	0.192832	0.374494	0.124627	0.779366	-0.33127	0.385951	1	-0.22053	0.64498	1	-0.101775	0.287236	0.916061	0.219824	0.0528602	0.421052	-0.365139	0.974976	1	0.0119044
63888	A4GALT	alpha 1,4-galactosyltransferase	0.195988	0.705368	0.465937	0.422647	0.708159	0.18504	0.237842	0.644853	0.280946	0.558859	0.902534	0.0871657	0.135677	0.785112	0.322084	0.795185	1	0.0978738	0.0851599	0.650004	0.376822	0.762938	1	-0.0519856	0.241926	0.705982	0.290126	0.198234	0.628424	0.298705
294284	AA926063	AA926063gene	0.974596	1	0.015033	0.0855199	0.380712	-0.915913	0.934007	1	-0.025184	0.0112763	0.132906	-0.821914	0.992555	1	-0.0585342	0.740865	1	-0.20173	0.979992	1	-0.00200588	0.396585	0.979785	-0.405489	0.957368	1	-0.0108672	0.0306942	0.35082	-0.851639
300259	AAAS	achalasia, adrenocortical insufficiency, alacrimia	0.727869	1	-0.0655341	0.130985	0.442484	-0.233291	0.636453	0.973311	-0.0510142	0.366923	0.757026	-0.100856	0.858875	1	-0.0322876	0.389972	1	-0.141816	0.572926	0.96651	-0.0728453	0.125392	0.773098	-0.240377	0.894106	1	-0.0204561	0.62685	0.959365	-0.0738045
65984	AACS	acetoacetyl-CoA synthetase	0.198074	0.707827	-0.599131	0.00958571	0.245897	-1.10604	0.00814468	0.166912	-0.70662	0.000502429	0.0247063	-0.878856	0.901389	1	-0.00913738	0.340265	1	-0.439447	0.0817165	0.646725	-0.631696	0.0577777	0.751369	-0.710958	0.498455	0.942454	-0.206021	0.0103713	0.249102	-0.834517
57300	AADAC	arylacetamide deacetylase	1	1	0	1	1	0	1	1	0	1	1	0	1	1	0	1	1	0	1	1	0	1	1	0	1	1	0	1	1	0
295076	AADACL2	arylacetamide deacetylase-like 2	1	1	0	1	1	0	1	1	0	1	1	0	1	1	0	1	1	0	1	1	0	1	1	0	1	1	0	1	1	0
313686	AADACL3	arylacetamide deacetylase-like 3	1	1	0	1	1	0	1	1	0	1	1	0	1	1	0	1	1	0	1	1	0	1	1	0	1	1	0	1	1	0
29416	AADAT	aminoadipate aminotransferase	0.37293	0.83352	0.458797	0.577278	0.857259	0.093188	0.590766	0.938152	0.159598	0.760938	1	-0.0279157	0.157662	0.798641	0.498777	0.708296	1	0.0950768	0.534909	0.952018	0.244408	0.94368	1	-0.0068523	0.171804	0.612622	0.433848	0.409436	0.825562	0.122427
171435	AAGAB	alpha- and gamma-adaptin binding protein	0.352351	0.83352	-0.292965	0.0844163	0.379479	0.307485	0.161233	0.550321	-0.254912	0.680312	0.994992	-0.0617755	0.522111	1	-0.116463	0.0461751	1	0.40229	0.20721	0.748449	-0.251217	0.831761	1	0.0243808	0.355581	0.832473	-0.16554	0.131569	0.53978	0.396609
500244	Aak1	AP2 associated kinase 1	0.604265	0.972054	-0.154608	0.139867	0.454222	-0.0920807	0.473938	0.852304	-0.113571	0.492832	0.847647	-0.305913	0.591936	1	-0.0874532	0.609698	1	0.187022	0.741813	1	-0.0665659	0.405572	0.981948	0.473712	0.311684	0.788817	-0.15505	0.300741	0.733022	-0.605423
361606	AAMDC	adipogenesis associated, Mth938 domain containing	0.672445	1	0.0537877	0.291456	0.616506	-0.334204	0.845593	1	0.0562394	0.574492	0.914868	-0.240098	0.704444	1	0.0348466	0.53686	1	-0.109739	0.638809	1	0.0715187	0.0440074	0.750579	-0.613425	0.889359	1	0.012631	0.600938	0.944006	0.162609
301512	AAMP	angio-associated, migratory cell protein	0.86466	1	0.0223294	0.510195	0.791818	-0.0710483	0.56529	0.920394	0.0537971	0.498628	0.851974	0.0889241	0.758516	1	-0.0591968	0.215731	1	-0.167936	0.860418	1	0.0221062	0.542841	1	-0.0871548	0.918988	1	-0.00157673	0.987758	1	-0.0102308
25120	AANAT	aralkylamine N-acetyltransferase	0.851218	1	0.0602163	0.0987344	0.399008	0.59928	0.918526	1	0.0380899	0.07581	0.369809	0.314954	0.829822	1	-0.0492502	0.0520085	1	0.305309	0.539686	0.952018	0.146633	0.048	0.750579	0.373013	0.788266	1	-0.0901369	0.0213689	0.31321	0.433021
296312	AAR2	AAR2 splicing factor homolog (S. cerevisiae)	0.18175	0.69949	-0.109933	0.156035	0.476205	0.207434	0.0208327	0.242839	-0.144971	0.791966	1	0.0750251	0.980589	1	-0.00359319	0.324562	1	0.138841	0.108216	0.671109	-0.119441	0.37416	0.96897	0.160019	0.573775	0.970249	-0.0400133	0.623384	0.957452	0.118703
246323	AARD	alanine and arginine rich domain containing protein	0.190475	0.701308	-0.413695	0.99708	1	-0.00108369	0.503053	0.874896	-0.169721	0.819469	1	0.0185676	0.0417668	0.721469	-0.361002	0.813716	1	-0.0196512	0.106823	0.66789	-0.314054	0.95069	1	-0.00100654	0.229524	0.692924	-0.276548	0.957237	1	-0.000438377
292023	AARS	alanyl-tRNA synthetase	0.00461746	0.452792	0.124444	0.174054	0.498197	0.197924	0.122038	0.495502	0.0712642	0.903641	1	0.00438995	0.00801438	0.721469	0.0934252	0.0202305	1	0.209479	0.0187699	0.612323	0.0936598	0.77005	1	0.0263647	0.0419875	0.391474	0.0856803	0.0314109	0.354726	0.242849
301254	AARS2	alanyl-tRNA synthetase 2, mitochondrial	0.4095	0.83352	-0.262185	0.0272693	0.28773	-0.409848	0.992606	1	0.0114036	0.0370697	0.255621	-0.369571	0.0551335	0.726854	-0.364269	0.843813	1	-0.121084	0.904063	1	-0.0479263	0.544997	1	-0.175909	0.102304	0.524792	-0.33188	0.0613665	0.437582	-0.397491
619440	Aarsd1	alanyl-tRNA synthetase domain containing 1	0.518342	0.910508	-0.0941519	0.24496	0.564857	-0.123224	0.784784	1	-0.0610827	0.836122	1	0.00684185	0.471433	0.971953	-0.112087	0.38637	1	-0.137349	0.487699	0.946389	-0.0813415	0.123179	0.770528	-0.318239	0.725546	1	-0.0705338	0.454511	0.861759	0.151513
300328	AASDHPPT	aminoadipate-semialdehyde dehydrogenase-phosphopantetheinyl transferase	0.130821	0.656949	-0.0675905	0.134461	0.446542	0.213611	0.0398769	0.317448	-0.16989	0.189033	0.570375	0.176719	0.383829	0.9512	0.0796474	0.916324	1	0.078276	0.218689	0.756182	-0.124575	0.943509	1	0.0037054	0.779637	1	0.0269039	0.0814974	0.46982	0.294904
296925	AASS	aminoadipate-semialdehyde synthase	0.302088	0.792527	-0.120241	0.714668	0.980725	-0.104227	0.455474	0.835413	-0.0676037	0.201398	0.587389	0.506918	0.0804674	0.7404	-0.121741	0.116232	1	-0.718738	0.521664	0.952018	-0.0506732	0.295484	0.924229	0.518431	0.0295083	0.352874	-0.132683	0.173913	0.599179	-0.693264
114512	AATF	apoptosis antagonizing transcription factor	0.645869	1	0.0384688	0.107412	0.410417	0.400209	0.7653	1	0.0282876	0.00442546	0.078752	0.405455	0.681197	1	0.0457048	0.684026	1	0.109515	0.556222	0.954981	0.0486466	0.13571	0.7876	0.264421	0.869086	1	0.0144864	0.0753448	0.459514	0.307445
690853	AATK	apoptosis-associated tyrosine kinase	0.00667335	0.471565	-0.270242	0.0961171	0.394701	-0.605718	0.25338	0.650937	-0.139054	0.00616693	0.0954753	-0.496084	0.021552	0.721469	-0.221746	0.283169	1	-0.259855	0.286532	0.809361	-0.125253	0.030887	0.748984	-0.45598	0.00170671	0.171431	-0.265256	0.0809965	0.469131	-0.401718
81632	ABAT	4-aminobutyrate aminotransferase	0.117586	0.651381	-0.59944	0.0511944	0.323848	-0.572032	0.108647	0.47297	-0.372172	0.0499031	0.302977	-0.575607	0.0466962	0.721469	-0.468433	0.849183	1	-0.139781	0.180181	0.720133	-0.348079	0.61978	1	-0.2089	0.00854926	0.257688	-0.531564	0.0616592	0.437582	-0.601595
313210	ABCA1	ATP-binding cassette, sub-family A (ABC1), member 1	0.706945	1	-0.0196049	0.0222655	0.278851	-0.77284	0.179592	0.575222	-0.164694	0.229753	0.622149	-0.563009	0.269803	0.866127	0.131141	0.75205	1	-0.358858	0.272984	0.798502	-0.145591	0.804839	1	0.0945465	0.392981	0.856032	0.114801	0.0350436	0.364342	-1.17468
289797	ABCA13	ATP-binding cassette, sub-family A (ABC1), member 13	0.489895	0.886601	0.120852	0.462467	0.744336	0.221618	0.738562	1	-0.0316516	0.474666	0.83349	-0.221481	0.170482	0.811887	0.149319	0.075565	1	0.384962	0.384222	0.876397	0.132606	0.586238	1	0.147938	0.87257	1	0.0274684	0.603763	0.945699	0.128174
293442	Abca15	ATP-binding cassette, sub-family A (ABC1), member 15	1	1	0	0.183663	0.50555	0.362857	1	1	0	0.0139135	0.149844	0.3932	1	1	0	0.855772	1	0.058565	1	1	0	0.161623	0.826556	0.280948	1	1	0	0.245942	0.685818	0.232497
287112	Abca17	ATP-binding cassette, sub-family A (ABC1), member 17	0.119301	0.651381	0.58727	0.0302106	0.294161	0.894187	0.226931	0.633242	0.310782	0.345932	0.737259	0.346546	0.0149664	0.721469	0.514812	0.128785	1	0.644372	0.197259	0.739204	0.328264	0.950279	1	0.025387	0.00827098	0.253336	0.534204	0.000590401	0.104224	1.19911
79248	ABCA2	ATP-binding cassette, sub-family A (ABC1), member 2	0.528222	0.917055	-0.0854124	0.0835808	0.378458	-0.333824	0.581319	0.931225	-0.0371076	0.0056171	0.0906822	-0.481185	0.343576	0.921325	-0.101145	0.568509	1	0.0669282	0.542614	0.952018	-0.0578494	0.329347	0.945352	-0.250361	0.36939	0.83841	-0.073647	0.346981	0.778988	-0.221549
310836	ABCA4	ATP-binding cassette, sub-family A (ABC1), member 4	0.517169	0.909666	-0.135153	0.646571	0.921238	0.144316	0.818586	1	-0.0665818	0.234758	0.62821	0.227472	0.254951	0.857365	-0.152867	0.733101	1	-0.0939585	0.479234	0.941563	-0.0973616	0.555038	1	0.145231	0.467576	0.917693	-0.110941	0.748734	1	0.0435896
286970	ABCA5	ATP-binding cassette, sub-family A (ABC1), member 5	0.185308	0.69989	0.206005	0.0156004	0.255991	1.038	0.673527	1	0.0951034	0.151011	0.510394	0.718653	0.378696	0.947715	0.212435	0.30308	1	0.441329	0.436663	0.910949	0.144234	0.0154721	0.74747	1.08273	0.541222	0.953214	0.164284	0.579501	0.92814	0.341934
299609	ABCA7	ATP-binding cassette, sub-family A (ABC1), member 7	0.959161	1	-0.00844196	0.135073	0.447355	-0.290205	0.600472	0.945271	0.0454598	0.0202177	0.18596	-0.355055	0.516108	1	-0.0701226	0.753059	1	-0.0214839	0.956235	1	0.0031126	0.0819445	0.752639	-0.33926	0.858581	1	-0.0197755	0.683883	1	-0.0764578
361439	ABCB10	ATP-binding cassette, sub-family B (MDR/TAP), member 10	0.279171	0.772729	-0.247825	0.232968	0.551878	-0.107129	0.0797041	0.416496	-0.222933	0.101197	0.425778	-0.179446	0.599843	1	-0.0594272	0.593292	1	0.0386299	0.161879	0.700136	-0.213019	0.884207	1	-0.031363	0.327162	0.805805	-0.128926	0.329659	0.763919	-0.122705
83569	Abcb11	ATP-binding cassette, subfamily B (MDR/TAP), member 11	0.0394012	0.558452	-0.554503	0.618714	0.895369	-0.115499	0.653505	0.987594	-0.122508	0.845211	1	-0.00579072	0.0964627	0.755068	-0.582939	0.713664	1	-0.0704393	0.325243	0.838006	-0.328413	0.415421	0.983977	0.203262	0.223514	0.687149	-0.461239	0.132213	0.540857	-0.344171
170913	ABCB1	ATP-binding cassette, sub-family B (MDR/TAP), member 1	0.825591	1	0.0367931	0.00475614	0.235112	4.25805	0.382444	0.790416	0.1268	1.08687e-05	0.00514149	3.72368	0.661415	1	-0.0287849	0.399388	1	1.18263	0.248463	0.77659	0.139462	0.0250811	0.74747	3.03482	0.497541	0.941507	-0.0699974	0.049793	0.405729	2.85867
24646	Abcb1b	ATP-binding cassette, sub-family B (MDR/TAP), member 1B	0.110674	0.644353	-0.435709	0.0656998	0.348006	-0.345055	0.214416	0.6189	-0.264213	0.0242605	0.204506	-0.619211	0.0604791	0.73794	-0.368928	0.421847	1	0.231912	0.393386	0.88274	-0.194055	0.276527	0.908449	-0.407515	0.00318597	0.202452	-0.452702	0.820777	1	-0.0666395
24891	ABCB4	ATP-binding cassette, sub-family B (MDR/TAP), member 4	0.741808	1	0.0374505	0.350445	0.681988	-0.125408	0.913495	1	0.0207885	0.464488	0.823724	-0.17082	0.464185	0.96796	0.0611144	0.953724	1	-0.00681376	0.751081	1	0.0215309	0.965146	1	0.00769655	0.567335	0.964948	0.0432206	0.35413	0.784756	-0.192316
140669	ABCB6	ATP-binding cassette, sub-family B (MDR/TAP), member 6	0.997534	1	0.000385918	0.137952	0.451505	0.378287	0.628566	0.967768	0.0171377	0.470355	0.829809	0.155547	0.633229	1	-0.0594107	0.178343	1	0.245315	0.934478	1	-0.0112343	0.944489	1	-0.00762143	0.928992	1	-0.00247081	0.00398149	0.190303	0.519529
302395	ABCB7	ATP-binding cassette, sub-family B (MDR/TAP), member 7	0.0738781	0.615352	-0.385119	0.206178	0.523905	0.161042	0.00947741	0.177334	-0.370277	0.954028	1	0.00619516	0.437546	0.962785	-0.144435	0.541705	1	0.152664	0.0234893	0.612323	-0.352522	0.261069	0.899687	0.353206	0.223593	0.687149	-0.204168	0.629277	0.961043	-0.139212
362302	ABCB8	ATP-binding cassette, sub-family B (MDR/TAP), member 8	0.234234	0.73693	-0.253815	0.956102	1	-0.0061386	0.429152	0.832967	-0.119824	0.479641	0.837688	0.0965019	0.280486	0.875611	-0.22894	0.43998	1	-0.126847	0.447994	0.918423	-0.148815	0.425663	0.986499	0.0981547	0.232312	0.696896	-0.221254	0.386359	0.814316	-0.114408
63886	ABCB9	ATP-binding cassette, sub-family B (MDR/TAP), member 9	0.69597	1	0.0322028	0.855118	1	0.0449312	0.714643	1	-0.0175909	0.684402	0.99755	-0.13844	0.320831	0.905486	0.0715661	0.514218	1	0.142291	0.5667	0.962448	-0.0357129	0.284018	0.914852	-0.243352	0.206319	0.66315	0.0859074	0.174905	0.600652	0.289566
24565	ABCC1	ATP-binding cassette, sub-family C (CFTR/MRP), member 1	0.354656	0.83352	-0.263132	0.893654	1	-0.0355917	0.434763	0.834589	-0.165584	0.582974	0.921567	-0.181003	0.144968	0.790296	-0.25473	0.630341	1	0.118666	0.456218	0.924928	-0.145468	0.461626	1	0.389494	0.104744	0.526929	-0.257768	0.415799	0.829164	-0.445865
316231	ABCC10	ATP-binding cassette, sub-family C (CFTR/MRP), member 10	0.161127	0.680893	0.284029	0.00940189	0.245897	0.733319	0.0112816	0.189286	0.426232	0.000406134	0.022745	0.984813	0.694822	1	-0.0326296	0.696668	1	-0.140372	0.256523	0.784077	0.270614	0.117455	0.762385	0.660271	0.480549	0.927127	0.144616	0.396583	0.819358	0.354528
291923	ABCC12	ATP-binding cassette, sub-family C (CFTR/MRP), member 12	0.416041	0.83352	-0.318348	0.556274	0.837238	-0.24977	0.566362	0.920876	-0.074491	0.492611	0.84739	-0.119425	0.418699	0.962785	-0.226348	0.684135	1	-0.188482	0.980028	1	-0.0155966	0.803089	1	0.0539999	0.140144	0.572064	-0.403031	0.122811	0.522735	-0.406406
25303	ABCC2	ATP-binding cassette, sub-family C (CFTR/MRP), member 2	0.293515	0.786927	0.246904	0.678911	0.949405	-0.104407	0.794488	1	0.0835763	0.948022	1	-0.0710772	0.0745139	0.7404	0.299495	0.588623	1	-0.132404	0.238622	0.770628	0.210777	0.538125	1	-0.166573	0.413826	0.87403	0.163818	0.95914	1	-0.00566158
140668	ABCC3	ATP-binding cassette, sub-family C (CFTR/MRP), member 3	0.415144	0.83352	-0.0938765	0.659367	0.932643	0.0297198	0.466015	0.845247	0.0750205	0.40164	0.769655	-0.0854548	0.0566714	0.729009	-0.200282	0.255122	1	0.104119	0.996202	1	-0.00286425	0.475505	1	-0.102355	0.260411	0.729649	-0.132766	0.278902	0.713597	0.138296
170924	ABCC4	ATP-binding cassette, sub-family C (CFTR/MRP), member 4	0.116409	0.650445	-0.281872	0.391791	0.708159	-0.0948306	0.0417102	0.326286	-0.271866	0.152509	0.51187	-0.504679	0.451759	0.962785	-0.137349	0.253122	1	0.370887	0.131665	0.680364	-0.226589	0.928021	1	-0.00958309	0.156683	0.591907	-0.191687	0.705717	1	-0.129845
116721	ABCC5	ATP-binding cassette, sub-family C (CFTR/MRP), member 5	0.785384	1	-0.028456	0.137435	0.450707	-0.180629	0.864479	1	-0.005235	0.237637	0.632139	-0.214407	0.504719	0.994604	-0.0511166	0.841815	1	-0.0207721	0.588655	0.977498	-0.0537169	0.902976	1	0.00652846	0.970116	1	0.00647701	0.223014	0.661694	-0.26555
81642	ABCC6	ATP-binding cassette, sub-family C (CFTR/MRP), member 6	0.94751	1	0.026635	0.555049	0.836133	-0.197005	0.894372	1	0.0152981	0.211884	0.599238	-0.266124	0.776283	1	0.120073	0.909024	1	-0.065683	0.787402	1	-0.049705	0.277504	0.909228	-0.255116	0.665414	1	0.121464	0.871056	1	-0.052492
25559	ABCC8	ATP-binding cassette, sub-family C (CFTR/MRP), member 8	0.73508	1	-0.059196	0.190943	0.512815	-0.399908	0.82288	1	0.0300393	0.00914117	0.118835	-0.467322	0.422629	0.962785	-0.158821	0.826859	1	-0.0506462	0.941198	1	-0.0178477	0.129099	0.776874	-0.375971	0.619348	1	-0.0842755	0.40413	0.82281	-0.196593
25560	ABCC9	ATP-binding cassette, sub-family C (CFTR/MRP), member 9	0.797219	1	0.0264672	0.998138	1	0.000718843	0.468376	0.847297	0.0897462	0.970767	1	-0.0190142	0.631093	1	-0.0378019	0.972594	1	0.00702574	0.71487	1	0.0497596	0.491943	1	0.284331	0.900382	1	-0.00597766	0.49361	0.891618	-0.287608
363516	ABCD1	ATP-binding cassette, sub-family D (ALD), member 1	0.873259	1	0.0298864	0.00729466	0.245683	0.314553	0.517384	0.886034	-0.0613195	0.00647302	0.0982676	0.236069	0.291045	0.886495	0.108439	0.43742	1	0.122269	0.988312	1	0.00128569	0.229467	0.88198	0.155586	0.694774	1	0.0443073	0.00736049	0.221074	0.278413
84356	ABCD2	ATP-binding cassette, sub-family D (ALD), member 2	0.0853555	0.623827	-0.860997	0.0957505	0.394132	-0.96964	0.00402729	0.125383	-0.801797	0.000573714	0.0266222	-1.18088	0.41762	0.962785	-0.322506	0.993199	1	0.0214481	0.0752142	0.642746	-0.6504	0.0608568	0.751369	-0.902828	0.104885	0.527147	-0.585364	0.446203	0.85328	-0.453287
25270	ABCD3	ATP-binding cassette, sub-family D (ALD), member 3	0.6876	1	-0.03468	0.0561766	0.332993	0.18965	0.105087	0.46746	-0.17973	0.978066	1	-0.0166153	0.252999	0.857365	0.127477	0.0216293	1	0.228492	0.37681	0.87154	-0.115047	0.447101	0.998013	0.0907386	0.626778	1	0.0629498	0.154395	0.573967	0.169536
299196	ABCD4	ATP-binding cassette, sub-family D (ALD), member 4	0.145769	0.667929	-0.405303	0.0469383	0.316324	-0.426764	0.369027	0.777595	-0.248327	0.000363184	0.021626	-0.513997	0.0500164	0.721469	-0.366387	0.839263	1	-0.0122491	0.0687597	0.628387	-0.332182	0.0614466	0.751369	-0.386802	0.226431	0.691557	-0.278026	0.315902	0.749904	-0.215377
361390	ABCE1	ATP-binding cassette, sub-family E (OABP), member 1	0.1422	0.666728	-0.190693	0.199806	0.519236	0.220243	0.0795998	0.416206	-0.213663	0.554415	0.899277	0.156068	0.647492	1	-0.0637903	0.63835	1	0.0951471	0.102715	0.665241	-0.197818	0.194981	0.852695	0.293867	0.46256	0.914424	-0.0853598	0.944999	1	0.0101139
85493	ABCF1	ATP-binding cassette, sub-family F (GCN20), member 1	0.362821	0.83352	0.0895441	0.0798058	0.370932	0.371291	0.970885	1	0.015652	0.062168	0.337279	0.292769	0.17154	0.812328	0.0824945	0.398598	1	0.128632	0.8332	1	0.0127052	0.438207	0.991675	0.129412	0.174149	0.615775	0.109554	0.0156329	0.28725	0.382346
311959	Abcf2	ATP-binding cassette, subfamily F (GCN20), member 2	0.513158	0.906261	-0.150383	0.331756	0.662599	0.574146	0.184467	0.582835	-0.197182	0.599636	0.934436	0.214745	0.895865	1	-0.0700004	0.16629	1	0.40034	0.126267	0.680364	-0.215359	0.712831	1	0.111589	0.870924	1	-0.0240847	0.0448046	0.392592	0.667585
287982	ABCF3	ATP-binding cassette, sub-family F (GCN20), member 3	0.41477	0.83352	0.244316	0.538207	0.818948	0.0819694	0.289989	0.69253	0.179015	0.360356	0.751974	0.145898	0.461602	0.967065	0.0671169	0.791588	1	-0.0409564	0.41421	0.896429	0.136557	0.809676	1	-0.0435957	0.26841	0.740487	0.189803	0.332326	0.766117	0.160546
85264	ABCG1	ATP-binding cassette, sub-family G (WHITE), member 1	0.0314276	0.540742	-0.225234	0.00721189	0.245683	-0.71036	0.0108634	0.186522	-0.299384	0.00153224	0.0436355	-0.569296	0.88093	1	-0.0144756	0.45854	1	-0.27653	0.0796586	0.646725	-0.257279	0.144956	0.803074	-0.402142	0.65073	1	-0.0725742	0.00790349	0.225455	-0.59016
312382	ABCG2	ATP-binding cassette, sub-family G (WHITE), member 2	0.0201372	0.512449	0.910431	0.0904849	0.386004	0.704132	0.0333412	0.295782	0.587647	0.00847394	0.113452	0.660355	0.0197442	0.721469	0.683033	0.53204	1	0.236438	0.0538324	0.618368	0.572461	0.222858	0.874256	0.389052	0.00128964	0.155132	0.76153	0.0276621	0.338947	0.614011
498327	Abcg3	ATP-binding cassette, sub-family G (WHITE), member 3	0.43556	0.84605	0.0408233	0.581296	0.860674	0.287893	0.542572	0.902431	0.0643069	0.709632	1	0.0597021	0.807201	1	-0.00382728	0.376659	1	0.176613	0.545761	0.952018	0.0876504	0.373604	0.968698	0.236583	0.833215	1	-0.0266672	0.606406	0.947593	0.130082
289453	Abcg3l1/Abcg3l3	ATP-binding cassette, subfamily G (WHITE), member 3-like 3	0.354943	0.83352	0.256316	0.291633	0.616579	-0.262833	0.547419	0.906246	0.121373	0.571481	0.912964	-0.209073	0.0592759	0.73794	0.26495	0.555792	1	-0.160665	0.291029	0.812114	0.171793	0.205181	0.859516	-0.338322	0.159865	0.595995	0.213297	0.95221	1	-0.0477578
360910	Abcg3l2	ATP-binding cassette, subfamily G (WHITE), member 3-like 2	1	1	0	1	1	0	1	1	0	1	1	0	1	1	0	1	1	0	1	1	0	1	1	0	1	1	0	1	1	0
305142	Abcg3l1/Abcg3l3	ATP-binding cassette, subfamily G (WHITE), member 3-like 3	0.0353248	0.553433	-0.394239	0.0975898	0.397502	-0.341577	0.160734	0.550028	-0.318332	0.304199	0.693557	-0.434743	0.329857	0.910537	-0.22446	0.807063	1	0.00665665	0.142307	0.685438	-0.339318	0.707692	1	0.150684	0.273968	0.746875	-0.235852	0.204698	0.637646	-0.634957
360997	Abcg3	ATP-binding cassette, sub-family G (WHITE), member 3	1	1	0	0.183663	0.50555	0.362857	0.813563	1	-0.0849929	0.0539311	0.314321	0.280705	0.813563	1	0.0849929	0.361973	1	0.17106	0.228322	0.763908	-0.200745	0.168916	0.831201	0.227651	0.228322	0.69276	0.200745	0.0913628	0.48516	0.285795
300664	ABCG4	ATP-binding cassette, sub-family G (WHITE), member 4	0.555988	0.937155	0.361409	0.523143	0.804435	0.156753	0.85429	1	0.128699	0.716135	1	0.00876572	0.274216	0.86898	0.502154	0.249879	1	0.240453	0.439633	0.913486	0.309332	0.876059	1	-0.0337512	0.565803	0.963621	0.262361	0.306335	0.739145	0.273577
114628	ABCG5	ATP-binding cassette, sub-family G (WHITE), member 5	0.250446	0.748122	-0.416978	0.193419	0.5138	-0.242014	0.723768	1	-0.0630218	0.616688	0.947168	0.123597	0.122934	0.779366	-0.408604	0.0532258	1	-0.378647	0.363751	0.864035	-0.233429	0.451272	0.998865	-0.187851	0.284932	0.759255	-0.340757	0.576783	0.925808	-0.13918
155192	ABCG8	ATP-binding cassette, sub-family G (WHITE), member 8	0.168269	0.690061	0.569741	0.664721	0.93749	0.17727	0.0723721	0.399772	0.563685	0.101398	0.426022	0.429313	0.392079	0.957876	0.284871	0.494607	1	-0.162866	0.00762186	0.612323	0.689501	0.80016	1	0.0562612	0.640964	1	0.163093	0.582654	0.930402	0.209825
313917	ABHD1	abhydrolase domain containing 1	0.0598722	0.598152	0.276419	0.248846	0.569451	0.107876	0.00315131	0.113852	0.24248	0.861697	1	0.0283644	0.207349	0.827135	0.134272	0.426359	1	0.114859	0.00684216	0.612323	0.240139	0.591914	1	0.0802281	0.148467	0.584463	0.161864	0.587529	0.934057	0.0753893
303953	ABHD10	abhydrolase domain containing 10	0.235374	0.738612	0.215594	0.143619	0.458537	0.448912	0.979152	1	0.00768811	0.0024266	0.0561421	0.524737	0.0177782	0.721469	0.233589	0.927735	1	-0.0360472	0.568979	0.963767	0.0579429	0.0894928	0.752639	0.394378	0.0477404	0.406305	0.238077	0.40728	0.824221	0.21743
360831	ABHD11	abhydrolase domain containing 11	0.736723	1	-0.130839	0.835694	1	-0.0522657	0.852329	1	0.0244636	0.708114	1	0.0796779	0.326202	0.908027	-0.311906	0.434513	1	-0.140002	0.84029	1	0.0242606	0.592494	1	-0.0950783	0.321839	0.800367	-0.250914	0.912476	1	0.0227045
499913	ABHD12	abhydrolase domain containing 12	0.423089	0.833779	0.0510538	0.0328391	0.297902	-0.223527	0.307653	0.71118	0.0719904	0.240485	0.636731	-0.126056	0.880689	1	-0.0196637	0.219462	1	-0.121225	0.487082	0.945838	0.0605797	0.155291	0.819776	-0.15187	0.821217	1	0.00791637	0.221915	0.660586	-0.154085
408202	ABHD12B	abhydrolase domain containing 12B	1	1	0	1	1	0	1	1	0	1	1	0	1	1	0	1	1	0	1	1	0	1	1	0	1	1	0	1	1	0
306630	ABHD13	abhydrolase domain containing 13	0.126653	0.656148	0.271874	0.376522	0.706809	0.227668	0.74266	1	0.0550195	0.137497	0.48529	0.169073	0.0440567	0.721469	0.342758	0.704215	1	0.0987911	0.483403	0.943565	0.13296	0.173731	0.836735	0.214846	0.130899	0.564287	0.271507	0.480537	0.881861	0.102111
300982	ABHD14A	abhydrolase domain containing 14A	0.136891	0.66199	-0.384061	0.0243551	0.284129	-0.505994	0.615006	0.95702	-0.147443	0.253343	0.649276	-0.282125	0.135541	0.785112	-0.35564	0.128558	1	-0.321564	0.227438	0.763908	-0.274697	0.106539	0.752639	-0.359869	0.370103	0.838704	-0.277058	0.164038	0.588241	-0.347355
300983	ABHD14B	abhydrolase domain containing 14B	0.37603	0.83352	-0.154057	0.0567608	0.333898	-0.652397	0.791156	1	-0.038782	0.0179827	0.173806	-0.513716	0.043499	0.721469	-0.169105	0.318644	1	-0.245899	0.397726	0.887015	-0.0816909	0.0303366	0.748984	-0.52293	0.151456	0.586662	-0.141662	0.158877	0.580245	-0.382672
303343	ABHD15	abhydrolase domain containing 15	0.219904	0.7253	0.583529	0.253548	0.574031	-0.257292	0.0953891	0.448192	0.491543	0.426637	0.794653	-0.276937	0.4108	0.962785	0.334096	0.920064	1	-0.0693072	0.0907991	0.656992	0.518984	0.893526	1	0.0282029	0.345735	0.822421	0.339758	0.247439	0.687479	-0.40091
361796	ABHD16A	abhydrolase domain containing 16A	0.71511	1	-0.0542884	0.885626	1	-0.0116609	0.594271	0.941413	0.105834	0.251401	0.647122	0.225047	0.344457	0.921487	-0.21719	0.224987	1	-0.247057	0.693634	1	0.078209	0.675096	1	-0.082774	0.416072	0.876498	-0.169616	0.725482	1	0.0637766
311720	ABHD16B	abhydrolase domain containing 16B	0.279257	0.772729	0.370324	0.0783242	0.368772	-0.222011	0.847205	1	0.130259	0.123724	0.461924	-0.250766	0.10332	0.761709	0.444347	0.937524	1	0.00674858	0.980898	1	-0.00978668	0.427339	0.986638	-0.154265	0.0286477	0.348136	0.571646	0.356927	0.788556	-0.149085
293050	ABHD2	abhydrolase domain containing 2	0.0821169	0.617992	-0.163522	0.111982	0.41596	-0.206056	0.581021	0.93097	-0.0788742	0.55714	0.901133	-0.182126	0.229985	0.849413	-0.144541	0.939624	1	-0.0562618	0.650248	1	-0.0679116	0.588406	1	0.221139	0.157357	0.592586	-0.170083	0.255431	0.697673	-0.506657
291793	ABHD3	abhydrolase domain containing 3	0.820974	1	-0.0194706	0.207203	0.524801	-0.239812	0.786082	1	0.00214193	0.0360567	0.251859	-0.230275	0.549021	1	-0.0521125	0.534861	1	-0.0860688	0.600654	0.984943	0.0365958	0.0462118	0.750579	-0.224819	0.372063	0.840515	-0.0727233	0.352472	0.783936	-0.120441
364380	ABHD4	abhydrolase domain containing 4	0.606249	0.972779	0.0164291	0.190266	0.512211	-0.189622	1	1	-0.0935833	0.0124524	0.141438	-0.476049	0.161306	0.801066	0.121736	0.198758	1	0.265249	0.25698	0.784077	-0.0884544	0.207678	0.862836	-0.32781	0.145961	0.579961	0.114268	0.847171	1	0.0679213
316122	ABHD5	abhydrolase domain containing 5	0.311885	0.799829	0.213806	0.0392026	0.309252	0.203259	0.51932	0.886654	0.149941	0.969323	1	0.095748	0.252126	0.857365	0.189029	0.500106	1	0.153718	0.187649	0.727218	0.200862	0.245193	0.891137	0.357515	0.570267	0.967083	0.125935	0.734687	1	-0.0711007
305795	ABHD6	abhydrolase domain containing 6	0.8438	1	0.0428988	0.852398	1	0.0438055	0.690855	1	-0.0223935	0.448794	0.810605	-0.0982968	0.371794	0.941628	0.137589	0.2341	1	0.187644	0.984447	1	0.00673824	0.571345	1	-0.0715648	0.61195	0.994962	0.0745591	0.321456	0.756132	0.145153
306338	ABHD8	abhydrolase domain containing 8	0.703791	1	0.0734653	0.315488	0.644399	-0.189048	0.982267	1	0.0476192	0.57632	0.91598	-0.138385	0.471662	0.971953	0.102829	0.66113	1	-0.0749278	0.583805	0.97358	0.0937731	0.240768	0.889225	-0.245385	0.830947	1	0.0298416	0.952894	1	-0.0147672
79249	ABI1	abl-interactor 1	0.582249	0.956189	0.097496	0.508109	0.790238	0.118865	0.7206	1	-0.0300862	0.676073	0.991348	0.0840952	0.158035	0.798641	0.195662	0.605748	1	0.075115	0.96527	1	0.00262691	0.116763	0.762277	0.222755	0.299047	0.775949	0.150061	0.655884	0.979311	-0.0508203
286928	ABI2	abl-interactor 2	0.0190531	0.509491	-0.390972	0.142963	0.457988	-0.372647	0.0416634	0.32607	-0.28857	0.0498549	0.3029	-0.48742	0.115204	0.773021	-0.235229	0.792439	1	0.0422393	0.0965586	0.659425	-0.261857	0.535737	1	-0.20759	0.023508	0.325459	-0.303715	0.259062	0.699661	-0.313451
303476	ABI3	ABI family, member 3	0.0425072	0.564993	0.23301	0.105297	0.407176	-0.386928	0.0347936	0.299963	0.259308	0.577991	0.917522	-0.136981	0.805581	1	0.0557069	0.200085	1	-0.298206	0.287404	0.809689	0.168169	0.13606	0.788933	-0.344644	0.23397	0.699591	0.169846	0.558159	0.923051	-0.187346
311860	ABL1	c-abl oncogene 1, non-receptor tyrosine kinase	0.120055	0.651381	0.34488	0.384729	0.708159	0.9627	0.158102	0.546797	0.206283	0.371115	0.761456	0.492256	0.0398992	0.721469	0.278893	0.247149	1	0.480068	0.163287	0.700724	0.198165	0.402857	0.981172	0.446455	0.011462	0.271863	0.30844	0.129677	0.536497	0.840353
304883	ABL2	v-abl Abelson murine leukemia viral oncogene homolog 2	0.252039	0.748427	0.304504	0.0176469	0.264032	0.189125	0.260103	0.65704	0.204587	0.844038	1	0.015827	0.191478	0.817027	0.253576	0.577082	1	0.211135	0.221164	0.757251	0.209126	0.271989	0.905858	0.631866	0.168072	0.608079	0.2481	0.498677	0.894791	-0.367087
360958	ABLIM2	actin binding LIM protein family, member 2	0.186749	0.701146	-0.507638	0.0107084	0.247926	-0.70213	0.110959	0.475976	-0.350372	0.000117945	0.0126622	-0.946827	0.0936898	0.750041	-0.361958	0.715219	1	0.13737	0.0492456	0.612323	-0.40152	0.100304	0.752639	-0.628168	0.111528	0.540347	-0.343562	0.405766	0.824213	-0.34378
307395	ABLIM3	actin binding LIM protein family, member 3	0.217187	0.722593	0.045722	0.173645	0.497906	-0.434512	0.409826	0.814841	0.0543649	0.0452478	0.286351	-0.413825	0.876685	1	0.00330887	0.592178	1	-0.153166	0.734954	1	-0.0287866	0.190567	0.848404	-0.306334	0.282581	0.756679	0.0937332	0.205255	0.638458	-0.317175
100301568	ABO	ABO blood group (transferase A, alpha 1-3-N-acetylgalactosaminyltransferase; transferase B, alpha 1-3-galactosyltransferase)	0.73238	1	0.0888988	0.629343	0.905433	0.0859305	0.53257	0.895859	-0.0847101	0.878439	1	-0.00370103	0.172967	0.812328	0.236543	0.416505	1	0.112161	0.972116	1	0.00252966	0.420925	0.98546	-0.134486	0.507746	0.949062	0.13698	0.0841763	0.474422	0.256569
296504	ABO	ABO blood group (transferase A, alpha 1-3-N-acetylgalactosaminyltransferase; transferase B, alpha 1-3-galactosyltransferase)	1	1	0	1	1	0	0.45421	0.834589	-0.0842966	1	1	0	0.45421	0.962785	0.0842966	1	1	0	0.550415	0.952018	-0.0561977	1	1	0	0.550415	0.953214	0.0561977	1	1	0
65270	ABO	ABO blood group (transferase A, alpha 1-3-N-acetylgalactosaminyltransferase; transferase B, alpha 1-3-galactosyltransferase)	1	1	0	1	1	0	1	1	0	0.304546	0.693557	0.0873447	1	1	0	0.304546	1	-0.0873447	1	1	0	0.572368	1	-0.0582298	1	1	0	0.572368	0.923051	0.0582298
65029	ABP1	amiloride binding protein 1 (amine oxidase (copper-containing))	0.422646	0.83352	-0.670222	0.422648	0.708159	-0.365699	0.325106	0.731574	-0.424226	0.395773	0.764011	-0.182849	0.209001	0.830645	-0.581106	0.304546	1	-0.182849	0.345426	0.853807	-0.424226	0.572368	1	-0.1219	0.15394	0.588417	-0.581106	0.101841	0.494263	-0.365699
287537	ABR	active BCR-related	0.151591	0.671842	-0.292488	0.327845	0.658785	0.099923	0.0124999	0.197226	-0.253946	0.575655	0.915693	0.1114	0.398077	0.959676	-0.124763	0.918507	1	-0.0174588	0.0927994	0.659425	-0.215274	0.11745	0.762385	0.257261	0.0958236	0.51536	-0.20345	0.450969	0.858292	-0.126024
286965	ABRA	actin-binding Rho activating protein	0.422647	0.83352	0.191751	0.422647	0.708159	-0.16281	0.25281	0.650829	0.0958757	0.699258	1	-0.0775094	0.45421	0.962785	0.0958757	0.439121	1	-0.0853007	0.129883	0.680364	0.191751	0.264569	0.901641	-0.168133	0.550415	0.953214	0.0639171	0.842022	1	-0.0489476
685045	ABRACL	ABRA C-terminal like	0.995833	1	-0.00107499	0.48966	0.771604	-0.0904094	0.928569	1	0.0547545	0.730102	1	0.0174301	0.921138	1	0.00373713	0.343378	1	-0.120698	0.969766	1	0.0188665	0.333708	0.946835	-0.159035	0.977641	1	-0.000444306	0.770137	1	0.0342027
306960	ABT1	activator of basal transcription 1	0.380905	0.83352	0.165282	0.666679	0.938741	0.0755205	0.285225	0.68675	0.111954	0.3202	0.711789	0.152563	0.431511	0.962785	0.0896404	0.638619	1	-0.0200299	0.525588	0.952018	0.0842911	0.588415	1	-0.0777965	0.169524	0.609329	0.14819	0.256556	0.698518	0.197495
297432	ABTB1	ankyrin repeat and BTB (POZ) domain containing 1	0.0618329	0.602708	-0.223413	0.011936	0.248824	-0.741969	0.0348049	0.299963	-0.167436	0.0054735	0.0898013	-0.635882	0.301156	0.892909	-0.114953	0.454726	1	-0.206792	0.0707465	0.636124	-0.174227	0.0406284	0.750579	-0.581171	0.13191	0.564287	-0.143316	0.187015	0.615653	-0.441689
171440	ABTB2	ankyrin repeat and BTB (POZ) domain containing 2	0.373101	0.83352	0.179467	0.328443	0.659598	-0.127941	0.614216	0.95622	0.0899441	0.0367254	0.254509	-0.232902	0.503575	0.993499	0.0987232	0.371674	1	0.0723452	0.635191	1	0.0917817	0.505042	1	-0.116226	0.438073	0.892343	0.150574	0.640268	0.968449	-0.0652338
24157	ACAA1	acetyl-CoA acyltransferase 1	0.995196	1	0.000495661	0.241142	0.561207	-0.956404	0.24486	0.650829	-0.199367	0.1935	0.576809	-0.615279	0.24344	0.857365	0.185593	0.270845	1	-0.38652	0.923214	1	-0.0476867	0.325451	0.944254	-0.468948	0.920516	1	0.043591	0.076205	0.45988	-0.821389
501072	ACAA1	acetyl-CoA acyltransferase 1	1	1	0	1	1	0	1	1	0	1	1	0	1	1	0	1	1	0	1	1	0	1	1	0	1	1	0	1	1	0
170465	ACAA2	acetyl-CoA acyltransferase 2	0.231021	0.735445	0.306347	0.0493387	0.320552	0.552454	0.240601	0.648302	0.196219	0.128049	0.470583	0.384387	0.279367	0.874081	0.190954	0.455047	1	0.298763	0.513222	0.952018	0.139939	0.753061	1	0.136365	0.0688273	0.45744	0.295466	0.01166	0.260961	0.643806
60581	ACACA	acetyl-CoA carboxylase alpha	0.240367	0.740898	-0.364134	0.206113	0.523895	-0.191659	0.0747378	0.404313	-0.364352	0.345039	0.73654	-0.296266	0.668885	1	-0.0855426	0.662922	1	0.0857987	0.165593	0.7026	-0.323763	0.660133	1	0.148219	0.362365	0.836812	-0.190335	0.312364	0.745559	-0.410034
116719	ACACB	acetyl-CoA carboxylase beta	0.597105	0.966973	0.0575122	0.3957	0.708159	-0.286514	0.899674	1	-0.0132291	0.191289	0.573126	-0.329293	0.602	1	0.0615753	0.889783	1	-0.102457	0.82788	1	-0.0256447	0.201726	0.857082	-0.31272	0.364773	0.836812	0.0992722	0.740765	1	-0.11771
304500	Acad10	acyl-CoA dehydrogenase family, member 10	0.74206	1	-0.11702	0.0120584	0.248824	-0.605647	0.758742	1	0.0882708	0.0303922	0.22981	-0.416905	0.295278	0.888274	-0.168023	0.182832	1	-0.283134	0.88699	1	0.0605458	0.00558849	0.74747	-0.524265	0.337343	0.815697	-0.20415	0.197744	0.628193	-0.314729
315973	ACAD11	acyl-CoA dehydrogenase family, member 11	0.764591	1	-0.017885	0.423911	0.709503	-0.0783169	0.898349	1	-0.00645254	0.693107	1	0.0384544	0.595954	1	-0.0248258	0.224221	1	-0.15543	0.78885	1	-0.00943247	0.461409	1	0.0803318	0.66815	1	-0.0188787	0.0863918	0.476166	-0.19764
294973	ACAD9	acyl-CoA dehydrogenase family, member 9	0.893219	1	-0.0203168	0.934253	1	0.0122437	0.502757	0.87483	-0.110859	0.372991	0.763192	-0.155165	0.664786	1	0.0234131	0.319602	1	0.117398	0.571231	0.964726	-0.0743605	0.350347	0.95631	-0.143885	0.737276	1	0.0248949	0.293057	0.726551	0.14354
25287	ACADL	acyl-CoA dehydrogenase, long chain	0.316068	0.80458	0.183927	0.000457803	0.219082	0.634175	0.505222	0.876074	0.0489877	0.246682	0.643118	0.270593	0.145635	0.790615	0.153715	0.0716769	1	0.472552	0.784506	1	0.041264	0.702025	1	0.117737	0.0449638	0.398973	0.210231	4.55973e-05	0.0517681	0.764153
24158	ACADM	acyl-CoA dehydrogenase, C-4 to C-12 straight chain	0.213153	0.718847	-0.0954739	0.163336	0.485346	-0.416786	0.0315877	0.29015	-0.133255	0.00160325	0.0450085	-0.453987	0.972127	1	0.00421143	0.988141	1	0.031941	0.0308988	0.612323	-0.13786	0.0756792	0.752639	-0.362046	0.961436	1	-0.000628431	0.398935	0.819672	-0.195422
64304	ACADS	acyl-CoA dehydrogenase, C-2 to C-3 short chain	0.178359	0.69949	0.313649	0.0563874	0.333198	0.237781	0.195776	0.595322	0.192439	0.523041	0.872333	0.131738	0.17768	0.814961	0.208806	0.841767	1	0.131592	0.393631	0.88274	0.158841	0.571213	1	-0.164258	0.0428372	0.393903	0.288556	0.113932	0.508453	0.489816
25618	ACADSB	acyl-CoA dehydrogenase, short/branched chain	0.0941856	0.626221	-0.408486	0.00594267	0.236709	-0.750414	0.766421	1	-0.118155	0.534619	0.883411	-0.399005	0.0821095	0.745898	-0.453008	0.553728	1	-0.462084	0.678945	1	-0.172339	0.721662	1	0.249093	0.12941	0.564287	-0.426535	0.0658729	0.447217	-1.28654
25363	ACADVL	acyl-CoA dehydrogenase, very long chain	0.492046	0.888615	0.199607	0.0177423	0.264422	0.5139	0.307777	0.711187	0.164086	0.0612633	0.334717	0.345341	0.64172	1	0.0292895	0.136288	1	0.276612	0.494079	0.950163	0.120004	0.298665	0.929209	0.20707	0.391665	0.855025	0.144061	0.000360313	0.0955585	0.514148
58968	ACAN	aggrecan	0.0454411	0.568509	0.54549	0.49532	0.777376	0.398573	0.8258	1	0.139098	0.495107	0.84894	0.348659	0.000793128	0.721469	0.583262	0.611076	1	0.17174	0.259622	0.784926	0.274513	0.149005	0.808792	0.569285	0.0336997	0.366245	0.511763	0.955271	1	0.00275432
287443	Acap1	ArfGAP with coiled-coil, ankyrin repeat and PH domains 1	0.282122	0.775507	0.237371	0.126628	0.436954	-0.378661	0.930408	1	0.0210205	0.238826	0.633819	-0.31574	0.0353808	0.721469	0.317836	0.753117	1	-0.0782839	0.356727	0.863813	0.174236	0.113688	0.758153	-0.461097	0.382312	0.84831	0.176088	0.977796	1	-0.0489054
619382	ACAP2	ArfGAP with coiled-coil, ankyrin repeat and PH domains 2	0.605456	0.972638	-0.178552	0.282417	0.606196	0.206017	0.326794	0.733339	-0.212551	0.970182	1	0.106175	0.916171	1	-0.0245073	0.590255	1	0.169414	0.522228	0.952018	-0.163641	0.262735	0.900639	0.500272	0.6119	0.994962	-0.0939303	0.589462	0.935558	-0.202392
313772	Acap3	ArfGAP with coiled-coil, ankyrin repeat and PH domains 3	0.62458	0.987412	-0.109912	0.267124	0.589187	-0.154912	0.859091	1	-0.00746994	0.0597616	0.330221	-0.173086	0.203197	0.824325	-0.203038	0.947899	1	-0.0410536	0.59489	0.982005	-0.0882583	0.0418812	0.750579	-0.19586	0.601	0.985749	-0.0918229	0.808569	1	-0.0304318
25014	ACAT1	acetyl-CoA acetyltransferase 1	0.49824	0.894008	-0.155851	0.617381	0.893971	0.114879	0.191853	0.594805	-0.164145	0.144928	0.500026	0.185886	0.682597	1	-0.101437	0.698724	1	-0.0904922	0.314858	0.831322	-0.134637	0.469254	1	0.0959207	0.426586	0.884996	-0.109742	0.807022	1	0.0507567
308100	ACAT2	acetyl-CoA acetyltransferase 2	0.852549	1	0.0766401	0.256466	0.577117	0.226332	0.340055	0.746762	-0.164763	0.243497	0.640585	0.14246	0.195461	0.817027	0.396475	0.264793	1	0.129388	0.624914	1	-0.169655	0.555728	1	0.0770579	0.387465	0.852307	0.323532	0.0358571	0.367993	0.239891
289312	ACBD3	acyl-CoA binding domain containing 3	0.353821	0.83352	-0.21462	0.378788	0.708159	0.17476	0.0843443	0.428515	-0.190789	0.697149	1	0.104555	0.397723	0.959676	-0.134127	0.512878	1	0.0738111	0.184987	0.724264	-0.162157	0.142472	0.799848	0.260252	0.163171	0.600044	-0.160768	0.811477	1	-0.0260374
303577	ACBD4	acyl-CoA binding domain containing 4	0.172891	0.696844	0.411115	0.0940956	0.392539	-0.371004	0.145764	0.530728	0.331933	0.247019	0.643395	-0.242264	0.293198	0.887307	0.214698	0.334942	1	-0.154954	0.0290685	0.612323	0.432376	0.0380684	0.750579	-0.3946	0.44241	0.895547	0.160949	0.716513	1	-0.10881
307170	ACBD5	acyl-CoA binding domain containing 5	0.720828	1	-0.131839	0.661344	0.934043	0.378935	0.191114	0.593376	-0.236705	0.749549	1	-0.126272	0.668818	1	0.0834159	0.267605	1	0.442138	0.344775	0.853098	-0.207518	0.538088	1	0.297702	0.982012	1	0.0245822	0.805507	1	0.186521
289125	ACBD6	acyl-CoA binding domain containing 6	0.943939	1	0.0135125	0.653703	0.927945	0.0574341	0.801974	1	0.0471409	0.602698	0.936927	0.078389	0.903974	1	-0.0239268	0.836686	1	-0.00685995	0.638555	1	0.0784009	0.763054	1	-0.0481012	0.743615	1	-0.0571503	0.51399	0.90672	0.129378
361277	ACBD7	acyl-CoA binding domain containing 7	0.741162	1	0.0283906	0.146224	0.462286	-0.206069	0.604212	0.948841	0.111307	0.0168667	0.167878	-0.29674	0.704438	1	-0.0734328	0.54183	1	0.082411	0.904398	1	0.0641074	0.700094	1	-0.0697434	0.97892	1	-0.023092	0.185579	0.614865	-0.207769
311218	ACCS	1-aminocyclopropane-1-carboxylate synthase homolog (Arabidopsis)(non-functional)	0.316553	0.804986	-0.301074	0.0654189	0.347737	0.16493	0.0733387	0.402186	-0.278499	0.948623	1	0.030026	0.618338	1	-0.157275	0.222262	1	0.152315	0.191557	0.732494	-0.245465	0.984427	1	0.00148779	0.2724	0.745335	-0.200867	0.181804	0.610315	0.224222
690470	ACCSL	1-aminocyclopropane-1-carboxylate synthase homolog (Arabidopsis)(non-functional)-like	0.605973	0.972638	-0.428692	0.985991	1	0.00303334	0.507244	0.877284	-0.401421	0.418045	0.785621	-0.150672	0.555856	1	-0.315193	0.407675	1	0.0998765	0.30169	0.820069	-0.480431	0.673124	1	0.0745882	0.74811	1	-0.187132	0.687517	1	-0.0884866
307798	ACD	adrenocortical dysplasia homolog (mouse)	0.129429	0.656564	0.461019	0.601029	0.879409	0.0685972	0.00592074	0.146691	0.48202	0.737439	1	0.0408356	0.666532	1	0.0964562	0.893081	1	0.0134581	0.0514995	0.618368	0.424264	0.569955	1	-0.100462	0.315512	0.792385	0.22958	0.263078	0.702305	0.187157
24310	ACE	angiotensin I converting enzyme (peptidyl-dipeptidase A) 1	0.102787	0.63637	-0.58225	0.758314	1	-0.124083	0.105025	0.46746	-0.346688	0.610199	0.942006	0.139953	0.0642909	0.739543	-0.467174	0.283207	1	-0.394827	0.0914379	0.657596	-0.406694	0.45478	0.999811	0.197437	0.0527355	0.420452	-0.446843	0.179688	0.608973	-0.406478
302668	ACE2	angiotensin I converting enzyme (peptidyl-dipeptidase A) 2	0.480509	0.87903	-0.166838	0.172282	0.496068	-0.341882	0.592294	0.939703	-0.10561	0.0145623	0.153694	-0.415664	0.172241	0.812328	-0.18109	0.987142	1	-0.0249434	0.507367	0.952018	-0.0927205	0.401937	0.980839	-0.190704	0.172652	0.614477	-0.169684	0.155905	0.575934	-0.298047
498012	Ace3	angiotensin I converting enzyme (peptidyl-dipeptidase A) 3	0.240028	0.740898	-0.801426	0.297537	0.623315	-0.298286	0.171094	0.56313	-0.483169	0.470421	0.82984	-0.204058	0.134467	0.784236	-0.45263	0.427252	1	-0.220402	0.122627	0.680364	-0.551691	0.893654	1	-0.0268051	0.123331	0.561179	-0.561668	0.101619	0.494263	-0.412967
301118	ACER1	alkaline ceramidase 1	0.248366	0.745627	0.349311	0.0791989	0.369756	0.852613	0.954531	1	-0.0326112	0.0364407	0.253403	0.564626	0.104354	0.764362	0.429963	0.371872	1	0.343613	0.915133	1	-0.0518616	0.3649	0.964497	0.337731	0.0548435	0.42706	0.533623	0.0097994	0.247105	0.817628
313339	ACER2	alkaline ceramidase 2	0.169071	0.690414	0.703128	0.166264	0.488062	0.266269	0.0422093	0.327931	0.585261	0.473243	0.832748	0.147982	0.230423	0.84974	0.458666	0.556118	1	0.160993	0.084072	0.649457	0.532778	0.943038	1	0.00667482	0.0877262	0.50016	0.518326	0.110006	0.500158	0.362586
83817	Ache	acetylcholinesterase	0.569284	0.947463	0.150424	0.0413945	0.313217	0.627712	0.0986368	0.455065	0.236185	0.419434	0.787624	0.17491	0.752268	1	-0.0238535	0.0547262	1	0.513834	0.312292	0.829953	0.176592	0.850205	1	0.0979763	0.739353	1	0.0446092	0.00086991	0.11156	0.759317
305884	ACIN1	apoptotic chromatin condensation inducer 1	0.729082	1	-0.0710009	0.312002	0.639628	-0.0919734	0.197959	0.595322	-0.144645	0.145655	0.500706	-0.0832201	0.63956	1	0.0123959	0.97666	1	-0.015082	0.285304	0.808414	-0.137417	0.982139	1	-0.00436968	0.87096	1	0.0223332	0.0968859	0.494263	-0.120371
24159	ACLY	ATP citrate lyase	0.243798	0.743589	-0.289408	0.0352432	0.303127	-0.521161	0.0294401	0.280405	-0.272149	0.00296702	0.0621505	-0.500903	0.465578	0.968941	-0.143635	0.821503	1	-0.0965615	0.0685514	0.628188	-0.252075	0.316346	0.938251	-0.262494	0.222544	0.685462	-0.175928	0.0340519	0.361987	-0.457822
171385	ACMSD	aminocarboxymuconate semialdehyde decarboxylase	0.432937	0.844121	0.449261	0.55785	0.839016	0.258683	0.579996	0.930245	-0.35176	0.574166	0.914661	-0.171625	0.0470982	0.721469	1.00513	0.100971	1	0.539124	0.857648	1	-0.052715	0.774689	1	-0.0688748	0.18205	0.625893	0.719765	0.145926	0.56077	0.450057
362323	Acn9	ACN9 homolog (S. cerevisiae)	0.0791325	0.615352	0.0887512	0.0187738	0.266432	0.286049	0.558523	0.915021	0.0611725	0.0672742	0.351138	0.332399	0.993204	1	0.0500897	0.828232	1	0.00704096	0.707931	1	0.0716297	0.900068	1	0.0527738	0.813959	1	0.0542089	0.10526	0.494263	0.346422
313220	Acnat1/Acnat2	acyl-coenzyme A amino acid N-acyltransferase 1	1	1	0	1	1	0	1	1	0	0.395778	0.764011	-0.0769765	1	1	0	0.395778	1	0.0769765	1	1	0	0.536248	1	-0.0769765	1	1	0	0.536248	0.917174	0.0769765
50655	ACO1	aconitase 1, soluble	0.272849	0.766111	-0.169015	0.766812	1	0.0315629	0.0253558	0.265565	-0.197207	0.848418	1	0.0107292	0.765227	1	-0.0402457	0.764106	1	-0.00489024	0.132035	0.680364	-0.147674	0.262509	0.900226	0.0779872	0.346118	0.822729	-0.100492	0.586417	0.933597	-0.0444779
79250	ACO2	aconitase 2, mitochondrial	0.324851	0.812485	0.136597	0.369683	0.699756	0.14142	0.304091	0.707863	0.0834658	0.718345	1	0.0156405	0.22298	0.844538	0.0646256	0.107431	1	0.111969	0.334761	0.843944	0.0713362	0.752923	1	0.0184479	0.144469	0.577735	0.114625	0.0366773	0.369144	0.165508
50559	Acot1	acyl-CoA thioesterase 1	0.0313655	0.540742	0.857705	0.468649	0.750456	0.479386	0.0857806	0.431309	0.644644	0.76319	1	0.179913	0.0920337	0.749239	0.55069	0.173378	1	0.469689	0.0057319	0.612323	0.810545	0.366776	0.965584	0.346453	0.212661	0.67116	0.445605	0.366425	0.798005	0.349467
100363074	ACOT11	acyl-CoA thioesterase 11	0.19412	0.703374	-0.35562	0.0316504	0.295495	-0.404861	0.284247	0.685947	-0.173413	0.190139	0.571189	-0.352636	0.172804	0.812328	-0.311047	0.926939	1	-0.0964467	0.678181	1	-0.100715	0.854925	1	-0.114318	0.0139865	0.283222	-0.416392	0.165061	0.589294	-0.440237
170570	ACOT12	acyl-CoA thioesterase 12	0.290392	0.784369	-0.176051	0.0905512	0.386004	0.71412	0.722747	1	-0.0181844	0.0031713	0.0647568	0.5801	0.0604559	0.73794	-0.257394	0.425165	1	0.181561	0.626499	1	-0.0751973	0.113787	0.758153	0.432173	0.288439	0.76358	-0.192713	0.0434093	0.388217	0.535834
291135	ACOT13	acyl-CoA thioesterase 13	0.233537	0.736893	0.173871	0.711327	0.977952	-0.0933788	0.295841	0.699262	0.12421	0.8087	1	-0.0912306	0.218136	0.839069	0.131748	0.852925	1	0.0228367	0.063367	0.62404	0.179513	0.502125	1	-0.167261	0.48864	0.93372	0.0796774	0.843624	1	0.0510844
192272	ACOT2	acyl-CoA thioesterase 2	0.00343965	0.452792	1.71228	0.00951422	0.245897	2.08648	5.27128e-05	0.02885	1.50009	2.0889e-06	0.00263358	2.01294	0.301383	0.892909	0.791024	0.679429	1	0.482698	0.00563515	0.612323	1.4116	0.0326924	0.750338	1.59749	0.0613079	0.443532	1.06438	0.064496	0.444129	1.32087
314304	ACOT1	acyl-CoA thioesterase 1	0.736501	1	-0.148107	0.00039442	0.219082	-0.586503	0.248368	0.650829	-0.19562	0.0843577	0.390061	-0.34306	0.841379	1	0.0986929	0.030536	1	-0.343515	0.409629	0.893432	-0.167319	0.000492794	0.74747	-0.50999	0.91833	1	-0.0130968	0.142335	0.556673	-0.305372
681337	ACOT4	acyl-CoA thioesterase 4	0.96717	1	0.0133738	0.00198431	0.219304	1.0261	0.995675	1	-0.0608056	0.0175058	0.171139	0.732093	0.956401	1	-0.0174989	0.288772	1	0.468956	0.979491	1	0.010324	0.371943	0.968486	0.368555	0.969265	1	-0.0230517	0.000463914	0.102148	1.0579
503049	Acot5	acyl-CoA thioesterase 5	0.198417	0.707827	-0.150983	0.877428	1	-0.0710959	0.130244	0.510356	-0.125013	0.964269	1	0.0933874	0.36795	0.938208	-0.0710304	0.711732	1	-0.0394436	0.250124	0.778167	-0.102787	0.995442	1	0.0291584	0.163056	0.59975	-0.113543	0.712396	1	-0.082273
26759	ACOT7	acyl-CoA thioesterase 7	0.463661	0.865709	0.289448	0.122189	0.432345	0.461146	0.112068	0.478084	0.352337	0.0385057	0.261256	0.607626	0.977131	1	0.0686833	0.605964	1	-0.1049	0.275423	0.800096	0.290653	0.748524	1	0.184403	0.545692	0.953214	0.139134	0.213259	0.648884	0.444318
170588	ACOT8	acyl-CoA thioesterase 8	0.389241	0.83352	0.120628	0.379958	0.708159	0.113601	0.296745	0.700037	0.15101	0.155833	0.517921	0.294616	0.951851	1	0.0179727	0.384842	1	-0.188451	0.423845	0.902223	0.13644	0.829022	1	-0.0348945	0.698917	1	0.0405148	0.43138	0.840454	0.183884
302640	ACOT9	acyl-CoA thioesterase 9	0.108169	0.643195	0.0832818	0.0278589	0.289164	0.208925	0.430354	0.834254	0.0553868	0.0768892	0.372183	0.128885	0.525179	1	0.043537	0.160057	1	0.123406	0.243666	0.772776	0.0816256	0.17918	0.838773	0.116025	0.753576	1	0.0346309	0.0179457	0.295721	0.176997
50681	ACOX1	acyl-CoA oxidase 1, palmitoyl	0.769702	1	-0.0690169	0.0310784	0.295359	0.202345	0.666933	0.997969	-0.0832643	0.620748	0.950489	-0.0993485	0.760326	1	-0.0544735	0.261027	1	0.324724	0.588198	0.977174	-0.0832988	0.381313	0.973286	0.305803	0.809085	1	-0.0316306	0.85324	1	-0.0283325
252898	ACOX2	acyl-CoA oxidase 2, branched chain	0.674155	1	-0.197937	0.18366	0.50555	0.510199	0.8266	1	-0.180739	0.645398	0.968551	0.180708	0.513248	1	-0.250886	0.0841529	1	0.454531	0.313841	0.830775	-0.321682	0.44275	0.994168	0.204339	0.9545	1	-0.02013	0.0814079	0.4697	0.517607
83522	ACOX3	acyl-CoA oxidase 3, pristanoyl	0.848407	1	-0.0420007	0.95448	1	-0.00363538	0.945264	1	-0.014789	0.539999	0.887492	-0.0895848	0.673835	1	-0.0708647	0.554561	1	0.0694621	0.990041	1	-0.0172306	0.672602	1	0.0678642	0.708657	1	-0.0533214	0.655063	0.978657	-0.0782071
296138	ACOXL	acyl-CoA oxidase-like	0.481542	0.879993	0.325148	0.277538	0.600492	0.244755	0.807776	1	0.214075	0.553034	0.898396	0.118213	0.262713	0.861213	0.304078	0.449855	1	0.158184	0.202432	0.741539	0.380152	0.887469	1	0.0183552	0.844242	1	0.117714	0.143223	0.557743	0.318533
24161	ACP1	acid phosphatase 1, soluble	0.700467	1	0.0689613	0.136945	0.449906	1.25071	0.982775	1	-0.00446891	0.0538527	0.314079	0.850529	0.297523	0.889716	0.09893	0.295032	1	0.541577	0.833782	1	0.0261281	0.343075	0.950118	0.51129	0.409976	0.869983	0.0743203	0.00814274	0.227442	1.20345
24162	ACP2	acid phosphatase 2, lysosomal	0.526215	0.915928	-0.0262143	0.65406	0.928291	-0.0794207	0.680454	1	0.0359279	0.645053	0.968337	-0.03743	0.34012	0.917728	-0.0784691	0.79409	1	-0.0353001	0.638282	1	0.0343257	0.253379	0.894679	-0.156445	0.297248	0.773333	-0.0747204	0.759676	1	0.0527809
25732	Acp5	acid phosphatase 5, tartrate resistant	0.530642	0.919312	0.102945	0.77712	1	-0.0414655	0.169623	0.561541	0.215979	0.6449	0.968337	0.117811	0.545012	1	-0.0910919	0.504377	1	-0.140241	0.705902	1	0.0896148	0.495815	1	-0.147813	0.712613	1	0.0549594	0.652469	0.976411	0.0988707
295305	ACP6	acid phosphatase 6, lysophosphatidic	0.335553	0.822819	0.100381	0.774356	1	-0.0143094	0.815703	1	-0.0212847	0.655913	0.976382	0.0487603	0.148522	0.792419	0.167936	0.606682	1	-0.0797447	0.778474	1	0.0396955	0.388994	0.978953	-0.198138	0.392171	0.855409	0.10957	0.434889	0.843911	0.173501
315939	ACPL2	acid phosphatase-like 2	0.120696	0.651381	-0.555954	0.0353604	0.303379	-0.795257	0.00865205	0.171263	-0.524093	2.7691e-05	0.00709365	-0.770901	0.491076	0.984547	-0.227953	0.685612	1	-0.145921	0.0978912	0.659444	-0.420361	0.0423492	0.750579	-0.581185	0.108889	0.53595	-0.386274	0.0666063	0.449446	-0.519679
56780	ACPP	acid phosphatase, prostate	0.817337	1	0.0700004	0.0274517	0.287994	-0.375488	0.918365	1	-0.00960929	0.125526	0.465135	-0.635258	0.658004	1	0.0619668	0.536041	1	0.178339	0.966057	1	-0.0207518	0.911297	1	-0.12688	0.527268	0.953214	0.108205	0.398366	0.819358	-0.400915
308569	ACPT	acid phosphatase, testicular	0.27928	0.772729	0.680219	0.812376	1	-0.0828662	0.313861	0.717265	0.307827	0.249536	0.645442	-0.250338	0.149828	0.792419	0.4381	0.442062	1	0.150129	0.415712	0.897435	0.260997	0.396046	0.979785	-0.248338	0.0496356	0.411562	0.667864	0.663063	0.983963	0.132068
24163	ACR	acrosin	0.167389	0.689129	0.304945	0.448492	0.731488	-0.343469	0.334884	0.742491	0.162658	0.904271	1	-0.0691762	0.247638	0.857365	0.198884	0.145923	1	-0.274293	0.767259	1	0.0514853	0.747551	1	-0.0595024	0.0311466	0.357189	0.373974	0.121769	0.522429	-0.398457
500316	ACRBP	acrosin binding protein	0.58236	0.956189	-0.194279	0.0705448	0.355156	-0.427446	0.72858	1	0.0423736	0.253323	0.649276	-0.291263	0.18523	0.817027	-0.409715	0.190327	1	-0.232243	0.835698	1	0.0621123	0.11461	0.758153	-0.338232	0.215197	0.674296	-0.378839	0.239389	0.679132	-0.263716
60353	ACRV1	acrosomal vesicle protein 1	0.422647	0.83352	-0.179639	0.42265	0.708159	0.126442	0.45421	0.834589	-0.0898194	0.936503	1	-0.0137553	0.25281	0.857365	-0.0898194	0.544534	1	0.140198	0.550415	0.952018	-0.0598796	0.408386	0.982268	0.173548	0.129883	0.564287	-0.179639	0.959004	1	-0.00495825
171410	ACSBG1	acyl-CoA synthetase bubblegum family member 1	0.0166435	0.509491	1.66808	0.432816	0.717528	0.373253	0.0143652	0.209442	1.20168	0.490958	0.846428	0.197362	0.102989	0.760915	1.10253	0.684168	1	0.117753	0.106786	0.66789	0.989388	0.803146	1	0.136676	0.00267605	0.190683	1.44676	0.323401	0.756838	0.341616
301120	ACSBG2	acyl-CoA synthetase bubblegum family member 2	0.42265	0.83352	0.167332	0.641404	0.916251	0.121514	0.875826	1	0.040863	0.438908	0.803694	-0.166908	0.345223	0.921856	0.210134	0.169778	1	0.256659	0.776066	1	0.0689619	0.963033	1	-0.0195522	0.588814	0.978642	0.182035	0.553393	0.923051	0.170983
619561	ACSF2	acyl-CoA synthetase family member 2	0.0865746	0.624514	-0.187725	0.10645	0.409218	-0.519459	0.895933	1	-0.0202675	0.0659678	0.348135	-0.335057	0.0319254	0.721469	-0.228158	0.103015	1	-0.306847	0.352278	0.860202	-0.111319	0.017559	0.74747	-0.409682	0.227453	0.692021	-0.159214	0.112478	0.505143	-0.323745
25288	ACSL1	acyl-CoA synthetase long-chain family member 1	0.104008	0.638243	-0.108805	0.0938548	0.392342	-0.235625	0.0138853	0.207751	-0.205628	0.00947722	0.120708	-0.330515	0.416796	0.962785	0.0717135	0.809875	1	0.0312304	0.229684	0.764714	-0.142459	0.228598	0.88198	-0.182699	0.835625	1	-0.0109839	0.337011	0.769398	-0.152688
114024	ACSL3	acyl-CoA synthetase long-chain family member 3	0.660129	1	0.154067	0.127483	0.438009	0.466797	0.360793	0.768032	-0.255725	0.155398	0.517365	0.299907	0.122231	0.778815	0.542445	0.0989948	1	0.297123	0.648472	1	-0.18727	0.00489564	0.74747	0.449784	0.278893	0.752475	0.436911	0.342638	0.776293	0.216023
113976	ACSL4	acyl-CoA synthetase long-chain family member 4	0.123037	0.655701	0.392435	0.0257632	0.285274	0.825426	0.497174	0.870525	0.19614	0.014407	0.152772	0.640604	0.066918	0.739543	0.391416	0.257102	1	0.346552	0.222886	0.758693	0.250049	0.00368482	0.74747	0.739507	0.146454	0.580973	0.338238	0.200382	0.631596	0.414971
94340	ACSL5	acyl-CoA synthetase long-chain family member 5	0.775109	1	0.0631438	0.00224316	0.219304	0.629629	0.33813	0.745418	0.086938	0.00291736	0.0618338	0.475181	0.846478	1	-0.0321214	0.280064	1	0.25034	0.649176	1	0.0516796	0.103559	0.752639	0.345321	0.750069	1	0.0297364	0.00471901	0.196769	0.526148
117243	ACSL6	acyl-CoA synthetase long-chain family member 6	0.030219	0.540742	-0.13174	0.234126	0.552544	-0.17387	0.00606055	0.148003	-0.119278	0.0156529	0.160198	-0.412537	0.244909	0.857365	-0.0640901	0.320991	1	0.188928	0.108886	0.671463	-0.0865571	0.332288	0.946835	-0.213355	0.0350668	0.371233	-0.106306	0.90038	1	-0.0350513
246263	ACSM2A	acyl-CoA synthetase medium-chain family member 2A	0.422647	0.83352	0.174788	1	1	0	0.19768	0.595322	0.174788	1	1	0	0.45421	0.962785	0.0873941	1	1	0	0.135389	0.680364	0.174788	1	1	0	0.536795	0.953214	0.0873941	1	1	0
24763	ACSM3	acyl-CoA synthetase medium-chain family member 3	0.111378	0.644353	-0.564337	0.36492	0.69441	0.172404	0.0945203	0.44788	-0.329773	0.997525	1	-0.0167713	0.0769184	0.7404	-0.423493	0.36257	1	0.215511	0.219879	0.757251	-0.296573	0.286485	0.916061	0.229072	0.00651671	0.2407	-0.518853	0.965506	1	0.0095784
353317	ACSM4	acyl-CoA synthetase medium-chain family member 4	0.847801	1	-0.0362761	0.611884	0.888884	-0.297752	0.462294	0.841642	0.112296	0.774297	1	-0.171055	0.292093	0.886994	-0.172766	0.402935	1	-0.212468	0.761596	1	0.0357385	0.287619	0.916397	-0.323166	0.561761	0.959847	-0.0921715	0.838267	1	-0.102427
361637	ACSM5	acyl-CoA synthetase medium-chain family member 5	0.422647	0.83352	0.174788	0.422647	0.708159	0.182555	0.80692	1	0.0357927	0.673321	0.988552	0.0548124	0.437286	0.962785	0.226389	0.495645	1	0.127743	0.505235	0.952018	-0.138481	0.825943	1	-0.0337294	0.0562185	0.430215	0.400663	0.131357	0.539502	0.277136
296259	ACSS1	acyl-CoA synthetase short-chain family member 1	0.356955	0.83352	-0.268022	0.655435	0.929243	-0.158396	0.451101	0.834589	-0.151666	0.654434	0.975409	-0.137795	0.117553	0.774587	-0.265311	0.594644	1	-0.117801	0.550549	0.952084	-0.108565	0.739162	1	-0.0713584	0.0420473	0.391474	-0.298449	0.44472	0.85162	-0.172236
311569	ACSS2	acyl-CoA synthetase short-chain family member 2	0.714967	1	0.0669757	0.142607	0.45745	0.220034	0.698257	1	0.0465679	0.275428	0.6748	0.138508	0.551368	1	0.0583836	0.309295	1	0.0952306	0.825955	1	0.022051	0.783145	1	0.0251153	0.399257	0.860133	0.0799086	0.0110749	0.255927	0.272831
314800	ACSS3	acyl-CoA synthetase short-chain family member 3	0.0304807	0.540742	-0.779997	0.0546637	0.32988	-0.855921	0.0918335	0.443918	-0.542734	0.0637278	0.340963	-0.793639	0.0920273	0.749239	-0.528055	0.855693	1	-0.133149	0.0575521	0.618368	-0.622911	0.72783	1	-0.21229	0.0917394	0.508007	-0.514016	0.0535311	0.417169	-0.952561
29437	ACTA1	actin, alpha 1, skeletal muscle	0.880726	1	-0.0373721	0.562421	0.843582	-0.176555	0.267037	0.663888	0.217744	0.832612	1	-0.097565	0.187772	0.817027	-0.324887	0.564706	1	-0.120603	0.707347	1	0.123185	0.169747	0.832559	-0.345251	0.558553	0.958114	-0.196271	0.658477	0.981086	0.0959738
81633	Acta2	smooth muscle alpha-actin	0.213612	0.718847	-0.451421	0.0445864	0.316239	-1.43168	0.556684	0.914027	-0.169546	0.00780965	0.108129	-1.0494	0.0200267	0.721469	-0.513985	0.272614	1	-0.649367	0.431248	0.907583	-0.215162	0.113806	0.758153	-0.817567	0.0385529	0.378892	-0.464102	0.00937164	0.241451	-1.18037
81822	ACTB	actin, beta	0.701932	1	0.00642607	0.161385	0.483381	0.306396	0.278015	0.677049	0.126917	0.00744576	0.104535	0.357433	0.316734	0.903538	-0.114967	0.738137	1	-0.05228	0.592712	0.980016	0.0704788	0.461117	1	0.157446	0.647512	1	-0.0600695	0.156763	0.576983	0.250667
294732	ACTBL2	actin, beta-like 2	0.422647	0.83352	-0.166311	1	1	0	0.45421	0.834589	-0.0831555	1	1	0	0.19768	0.817027	-0.166311	1	1	0	0.536795	0.952018	-0.0831555	1	1	0	0.135389	0.564287	-0.166311	1	1	0
29275	ACTC1	actin, alpha, cardiac muscle 1	0.336046	0.822995	-0.239398	0.210464	0.527284	0.246538	0.115275	0.484248	-0.181999	0.714639	1	0.0368384	0.424147	0.962785	-0.0898747	0.134814	1	0.228644	0.179567	0.719087	-0.183063	0.2238	0.874759	0.216203	0.237974	0.702562	-0.146959	0.470486	0.874523	0.118829
287876	ACTG1	actin, gamma 1	0.0509209	0.583988	0.332576	0.305854	0.633194	2.03066	0.00188623	0.0935518	0.448858	0.0920325	0.407412	1.47712	0.955255	1	0.020598	0.448882	1	0.617597	0.0930328	0.659425	0.335342	0.368382	0.966499	0.921724	0.457878	0.909484	0.15372	0.06669	0.449446	1.80718
25365	ACTG2	actin, gamma 2, smooth muscle, enteric	0.0255578	0.529018	0.736316	0.988432	1	-0.00442921	0.03114	0.288528	0.512015	0.263709	0.659467	-0.301129	0.0754755	0.7404	0.457739	0.271614	1	0.385608	0.0965682	0.659425	0.448336	0.582354	1	0.204645	0.00591666	0.237512	0.611232	0.569258	0.923051	-0.180915
361925	ACTL6A	actin-like 6A	0.21626	0.720638	-0.296958	0.0203264	0.272048	-0.193647	0.0764902	0.408578	-0.217629	0.0583204	0.325822	-0.18981	0.134424	0.784236	-0.211426	0.964256	1	-0.0428161	0.118479	0.680364	-0.20495	0.757484	1	-0.0543021	0.0500591	0.413395	-0.235026	0.0654419	0.446306	-0.216887
288563	Actl6b	actin-like 6B	0.589651	0.96167	0.0588801	0.0174862	0.263874	-0.774122	0.380524	0.788692	0.148021	0.155483	0.517365	-0.462764	0.662842	1	-0.0917742	0.201665	1	-0.40776	0.728312	1	0.081201	0.0450457	0.750579	-0.649249	0.911974	1	-0.00357184	0.289814	0.723155	-0.415048
298017	ACTL7A	actin-like 7A	0.0974737	0.629351	0.969489	0.644329	0.919159	0.129843	0.0851494	0.430149	0.660488	0.727278	1	-0.143406	0.0699898	0.739543	0.702521	0.426109	1	0.241486	0.0900145	0.655106	0.62048	0.526669	1	0.182929	0.0284961	0.347507	0.803345	0.889417	1	-0.0203926
313183	ACTL7B	actin-like 7B	0.00331993	0.452792	1.17134	0.393429	0.708159	0.131935	0.111916	0.477678	0.634681	0.556873	0.90105	0.0917506	0.00498711	0.721469	0.953052	0.696403	1	0.0461773	0.114535	0.676795	0.665496	0.7613	1	0.0304063	0.000700736	0.141294	1.03509	0.426902	0.837092	0.147505
314659	ACTL9	actin-like 9	1	1	0	1	1	0	1	1	0	1	1	0	1	1	0	1	1	0	1	1	0	1	1	0	1	1	0	1	1	0
292516	Actl9b	actin-like 9b	1	1	0	1	1	0	1	1	0	1	1	0	1	1	0	1	1	0	1	1	0	1	1	0	1	1	0	1	1	0
81634	ACTN1	actinin, alpha 1	0.139917	0.66521	-0.184385	0.951451	1	-0.00598802	0.28831	0.690462	-0.0950705	0.918825	1	0.0213666	0.0250183	0.721469	-0.173855	0.942359	1	-0.053757	0.223206	0.759236	-0.105976	0.314157	0.937325	0.222409	0.0252126	0.334244	-0.168051	0.298001	0.730523	-0.239194
291245	ACTN2	actinin, alpha 2	0.0607588	0.599932	1.65767	0.148414	0.465351	1.02141	0.00234062	0.101427	1.38018	0.0127514	0.14296	0.976061	0.257349	0.857711	0.741871	0.660255	1	0.301333	0.0133099	0.612323	1.35475	0.0400218	0.750579	0.962018	0.0842256	0.494001	1.01027	0.290657	0.72396	0.485187
171009	Actn3	actinin alpha 3	0.153498	0.673514	-0.508374	0.508788	0.790727	-0.154098	0.140451	0.523283	-0.431164	0.0795306	0.377301	-0.339199	0.202999	0.824325	-0.240283	0.518453	1	0.106981	0.0117002	0.612323	-0.546346	0.278397	0.910525	-0.226283	0.525385	0.953214	-0.185844	0.886744	1	-0.00522062
63836	ACTN4	actinin, alpha 4	0.0192068	0.509491	0.42024	0.0334606	0.299848	0.475516	0.0144557	0.209442	0.309225	0.0366843	0.254509	0.459792	0.0305303	0.721469	0.264773	0.583612	1	0.0948143	0.0153599	0.612323	0.295104	0.0250117	0.74747	0.504959	0.00980583	0.264772	0.316469	0.649557	0.974773	0.155426
299121	ACTR10	actin-related protein 10 homolog (S. cerevisiae)	0.073076	0.615352	-0.0521101	0.186496	0.508327	0.267309	0.0612273	0.377107	-0.109756	0.0319623	0.236146	0.194396	0.45363	0.962785	0.0451991	0.691704	1	0.0844858	0.145922	0.689584	-0.10136	0.370015	0.968068	0.13261	0.770182	1	0.0277312	0.0634623	0.441688	0.22766
294010	ACTR1A	ARP1 actin-related protein 1 homolog A, centractin alpha (yeast)	0.437312	0.847264	0.0662758	0.0474063	0.317471	0.0969299	0.74058	1	-0.0367596	0.695255	1	-0.0482952	0.184113	0.817027	0.105652	0.190152	1	0.168676	0.676088	1	-0.0403673	0.443827	0.994991	-0.0986718	0.132249	0.564287	0.129607	0.0607225	0.436515	0.235729
316333	ACTR1B	ARP1 actin-related protein 1 homolog B, centractin beta (yeast)	0.269949	0.763954	0.128153	0.58108	0.860429	0.0170652	0.0409295	0.322912	0.139655	0.916631	1	0.000407917	0.759027	1	0.0198072	0.933072	1	0.0240244	0.103926	0.665241	0.126132	0.363144	0.963204	-0.0883653	0.477311	0.924441	0.0551745	0.257629	0.69933	0.113575
289820	ACTR2	ARP2 actin-related protein 2 homolog (yeast)	0.421578	0.83352	-0.11249	0.443709	0.727623	-0.0836666	0.966337	1	-0.0207731	0.469597	0.828902	-0.221818	0.169895	0.810397	-0.136447	0.631102	1	0.105645	0.781336	1	-0.0430112	0.553387	1	0.199828	0.266435	0.738672	-0.121885	0.385638	0.814206	-0.322219
81732	ACTR3	ARP3 actin-related protein 3 homolog (yeast)	0.0316215	0.540742	-0.178631	0.0365752	0.305169	0.263257	0.00450058	0.13022	-0.187953	0.0283562	0.222147	0.239785	0.670329	1	-0.0568092	0.635728	1	0.0502269	0.0598052	0.623149	-0.157762	0.0165628	0.74747	0.282729	0.182386	0.626217	-0.102456	0.647606	0.973102	0.0771989
362298	ACTR3B	ARP3 actin-related protein 3 homolog B (yeast)	0.106458	0.641308	0.467165	0.048828	0.319456	0.263057	0.179166	0.574612	0.286779	0.585139	0.923875	0.0845549	0.1024	0.758183	0.390508	0.316041	1	0.215824	0.332334	0.84087	0.240696	0.849545	1	-0.0340288	0.0195304	0.305511	0.452232	0.0359263	0.367993	0.397212
362258	ACTR5	ARP5 actin-related protein 5 homolog (yeast)	0.203171	0.709351	0.321455	0.481643	0.763084	0.125912	0.150883	0.538326	0.232163	0.395508	0.764011	0.106922	0.256377	0.857443	0.208968	0.843323	1	-0.00524237	0.416096	0.897659	0.163249	0.44341	0.994815	-0.171859	0.0425607	0.392638	0.30525	0.120165	0.519518	0.331664
314718	ACTR6	ARP6 actin-related protein 6 homolog (yeast)	0.212548	0.718336	-0.207197	0.346862	0.678973	-0.409474	0.30526	0.708833	-0.182265	0.0873832	0.397791	-0.336779	0.463007	0.967226	-0.0575453	0.632254	1	-0.0455385	0.343076	0.852131	-0.149185	0.314341	0.937358	-0.227536	0.395974	0.85849	-0.137948	0.162788	0.586353	-0.309378
302796	ACTRT1	actin-related protein T1	1	1	0	1	1	0	1	1	0	1	1	0	1	1	0	1	1	0	1	1	0	1	1	0	1	1	0	1	1	0
298671	ACTRT2	actin-related protein T2	1	1	0	1	1	0	1	1	0	1	1	0	1	1	0	1	1	0	1	1	0	1	1	0	1	1	0	1	1	0
365763	ACTRT3	actin-related protein T3	0.564134	0.943084	0.204694	0.611781	0.888884	-0.149341	0.734472	1	0.0719839	0.128682	0.471447	-0.342366	0.26729	0.863867	0.273412	0.443081	1	0.17999	0.898892	1	0.0451473	0.41434	0.98389	-0.225194	0.163645	0.600434	0.274679	0.968697	1	0.0217278
79558	ACVR1	activin A receptor, type I	0.0977157	0.629522	0.0593314	0.424854	0.710385	-0.0888995	0.947837	1	-0.00612018	0.447651	0.810053	-0.176732	0.341414	0.919399	0.0870437	0.722456	1	0.0433834	0.879672	1	0.00818162	0.61502	1	0.117802	0.357854	0.834258	0.0781242	0.336075	0.768904	-0.251151
29381	ACVR1B	activin A receptor, type IB	0.0480195	0.577089	-0.350087	0.0282415	0.289475	-0.242642	0.0982881	0.454602	-0.263931	0.321816	0.713053	-0.321032	0.176392	0.813603	-0.188036	0.747303	1	0.0314369	0.0220113	0.612323	-0.326715	0.623711	1	0.166721	0.260161	0.729235	-0.174028	0.209049	0.644012	-0.505894
245921	ACVR1C	activin A receptor, type IC	0.695486	1	-0.153135	0.14353	0.458496	-0.568028	0.540359	0.901359	-0.124691	0.12037	0.456775	-0.62097	0.704379	1	-0.0982943	0.91629	1	0.027129	0.816276	1	-0.0672527	0.949842	1	-0.051713	0.410598	0.870401	-0.160211	0.122341	0.52249	-0.714262
29263	ACVR2A	activin A receptor, type IIA	0.256784	0.753192	0.172517	0.398677	0.708159	0.163294	0.595661	0.94206	-0.115619	0.92553	1	0.000906298	0.130364	0.784236	0.375016	0.455212	1	0.181661	0.857238	1	-0.0693425	0.397956	0.979785	0.222611	0.214211	0.673101	0.328325	0.91095	1	0.00153887
25366	ACVR2B	activin A receptor, type IIB	0.679079	1	-0.0407537	0.920762	1	0.0213596	0.488181	0.864212	-0.125031	0.45042	0.812438	0.0866313	0.70968	1	0.0775626	0.59062	1	-0.0592433	0.264351	0.789394	-0.193468	0.899336	1	0.0174763	0.466561	0.917007	0.136891	0.918994	1	0.0130127
25237	ACVRL1	activin A receptor type II-like 1	0.374878	0.83352	0.19469	0.0003593	0.210996	-0.340112	0.261002	0.657518	0.172064	0.53377	0.882635	-0.122384	0.563994	1	0.150188	0.107105	1	-0.272351	0.815203	1	0.0606133	0.108106	0.753396	-0.275979	0.0981237	0.518618	0.241493	0.371966	0.802652	-0.195712
300981	ACY1	aminoacylase 1	0.526658	0.916137	-0.204283	0.367404	0.697614	-0.235249	0.894366	1	0.00910671	0.592315	0.929107	-0.136573	0.138949	0.78667	-0.305397	0.57211	1	-0.14084	0.842054	1	-0.0360426	0.219947	0.871975	-0.293826	0.228498	0.69276	-0.267003	0.971049	1	-0.0338936
293653	ACY3	aspartoacylase (aminocyclase) 3	0.533979	0.921718	-0.158393	0.0243869	0.284129	-0.454935	0.988509	1	-0.0395225	0.00558433	0.0906553	-0.536015	0.235512	0.854629	-0.235729	0.897369	1	0.0284446	0.321413	0.836668	-0.181326	0.0312973	0.748984	-0.494203	0.784903	1	-0.0688176	0.614502	0.952919	-0.129922
299203	ACYP1	acylphosphatase 1, erythrocyte (common) type	0.672445	1	0.1703	0.781331	1	-0.0947911	0.808529	1	0.112283	0.875742	1	0.0147835	0.439708	0.962785	0.183121	0.608899	1	-0.0259776	0.519095	0.952018	0.172057	0.637099	1	-0.113597	0.681534	1	0.0967115	0.939863	1	0.0150745
364224	ACYP2	acylphosphatase 2, muscle type	0.0730534	0.615352	-0.256276	0.115971	0.421736	-0.245789	0.105746	0.468893	-0.161844	0.533183	0.882164	-0.14394	0.110621	0.765689	-0.174483	0.294268	1	-0.156051	0.280246	0.803917	-0.121537	0.246638	0.892274	-0.20269	0.00570826	0.234245	-0.246848	0.483217	0.884396	-0.143095
24165	ADA	adenosine deaminase	1	1	0.219989	0.161603	0.48342	-0.549232	0.0852521	0.430176	0.303611	0.729578	1	-0.160737	0.759481	1	-0.0860112	0.0806294	1	-0.486003	0.339929	0.849199	0.223393	0.165381	0.828023	-0.42728	0.664134	1	0.0691294	0.371505	0.80258	-0.337531
294979	ADAD1	adenosine deaminase domain containing 1 (testis-specific)	0.419738	0.83352	-0.223864	0.292586	0.617782	0.313086	0.807407	1	-0.0114205	0.855045	1	0.0760923	0.266912	0.863448	-0.218513	0.172143	1	0.325296	0.942126	1	0.0443424	0.477674	1	0.172358	0.0839911	0.493571	-0.344851	0.31911	0.753182	0.274524
29650	ADAM10	ADAM metallopeptidase domain 10	0.332785	0.8202	-0.355756	0.541443	0.822109	-0.0581993	0.163466	0.552785	-0.290627	0.467494	0.826559	-0.204922	0.525596	1	-0.142003	0.591133	1	0.119766	0.403774	0.889613	-0.216357	0.500349	1	0.204455	0.186111	0.632097	-0.283609	0.374124	0.804461	-0.291039
360638	ADAM11	ADAM metallopeptidase domain 11	0.784206	1	0.0530737	0.045126	0.316239	0.744821	0.934887	1	0.021546	0.635366	0.961632	0.191728	0.61869	1	0.0204026	0.0599068	1	0.654509	0.563788	0.960515	0.0924395	0.665748	1	0.214488	0.893258	1	-0.025383	0.0209685	0.3116	0.812413
57025	ADAM15	ADAM metallopeptidase domain 15	0.0920806	0.626221	0.167461	0.0933399	0.3914	-0.375875	0.15414	0.542356	0.179499	0.12964	0.472775	-0.323848	0.634398	1	0.0619928	0.517133	1	-0.137415	0.138259	0.682747	0.181603	0.0355925	0.750579	-0.414832	0.54668	0.953214	0.0663555	0.710845	1	-0.114798
57027	ADAM17	ADAM metallopeptidase domain 17	0.0400249	0.56143	-0.477276	0.0683366	0.351564	-0.248095	0.000920941	0.0760809	-0.430007	0.310316	0.700792	-0.131076	0.247726	0.857365	-0.239169	0.340695	1	-0.139618	0.00533959	0.612323	-0.408245	0.812879	1	-0.0524033	0.0878076	0.500456	-0.29209	0.0331381	0.359489	-0.285923
303068	ADAM19	ADAM metallopeptidase domain 19	0.307699	0.796989	-0.180234	0.0488152	0.319456	-0.826762	0.55943	0.915924	0.0722416	0.305924	0.695285	-0.400027	0.0205508	0.721469	-0.349151	0.0707876	1	-0.627071	0.951813	1	-0.0148061	0.430182	0.988008	-0.268929	0.164697	0.602348	-0.257731	0.00220927	0.166124	-0.900199
56777	Adam1a	a disintegrin and metallopeptidase domain 1a	0.0369372	0.555306	-0.567973	0.150315	0.468472	-0.312188	0.0752316	0.405698	-0.402074	0.0208322	0.18901	-0.280084	0.108267	0.765689	-0.369948	0.911846	1	-0.03863	0.00321635	0.612323	-0.553119	0.0678398	0.752639	-0.291463	0.244023	0.707813	-0.272194	0.422278	0.834585	-0.126963
56806	ADAM2	ADAM metallopeptidase domain 2	0.376189	0.83352	0.371216	0.666242	0.938501	0.163769	0.934562	1	0.0732712	0.473457	0.83298	0.171494	0.0631296	0.739543	0.483553	0.988375	1	0.0811839	0.705199	1	0.112811	0.719131	1	0.112667	0.136401	0.566426	0.444014	0.653106	0.977019	0.135328
301460	ADAM23	ADAM metallopeptidase domain 23	0.0888695	0.624514	-0.562199	0.130237	0.440592	0.740767	0.0116144	0.190175	-0.422586	0.0732568	0.365265	0.551372	0.146635	0.791694	-0.275766	0.26481	1	0.385348	0.016868	0.612323	-0.439258	0.156513	0.821461	0.461085	0.0812134	0.48751	-0.355725	0.0625891	0.440122	0.591922
290763	Adam34 (includes others)	predicted gene 5347	1	1	0	1	1	0	1	1	0	1	1	0	1	1	0	1	1	0	1	1	0	1	1	0	1	1	0	1	1	0
685846	Adam34 (includes others)	predicted gene 5347	1	1	0	1	1	0	1	1	0	1	1	0	1	1	0	1	1	0	1	1	0	1	1	0	1	1	0	1	1	0
290344	ADAM28	ADAM metallopeptidase domain 28	1	1	0	0.193269	0.5138	0.432634	0.264712	0.661392	-0.209624	0.135876	0.483084	0.345252	0.264712	0.861967	0.209624	0.314322	1	0.212421	1	1	-0.181525	0.149621	0.809761	0.318772	0.376673	0.843445	0.181525	0.171626	0.597097	0.299754
690547	ADAM30	ADAM metallopeptidase domain 30	0.422648	0.83352	0.245864	1	1	0	0.376941	0.785193	0.156749	0.395774	0.764011	-0.136275	0.179229	0.81636	0.212048	0.395774	1	0.136275	0.311269	0.828589	0.156749	0.572368	1	-0.09085	0.168427	0.608081	0.212048	0.572368	0.923051	0.09085
361170	ADAM32	ADAM metallopeptidase domain 32	0.504083	0.898602	0.200229	0.881317	1	-0.0684564	0.163138	0.552435	0.224635	0.716858	1	-0.048205	0.856742	1	-0.0201681	0.908702	1	0.104788	0.59268	0.980016	0.146237	0.442345	0.994168	-0.201981	0.467539	0.917693	0.122147	0.627923	0.960483	0.152386
57021	Adam3	a disintegrin and metallopeptidase domain 3 (cyritestin)	1	1	0	1	1	0	1	1	0	1	1	0	1	1	0	1	1	0	1	1	0	1	1	0	1	1	0	1	1	0
57022	Adam4/Gm4787	a disintegrin and metallopeptidase domain 4	0.630963	0.992745	0.0378731	0.790285	1	0.0601371	0.214945	0.6189	0.147765	0.52506	0.87416	0.0494356	0.388532	0.955343	-0.119692	0.981145	1	-0.0132389	0.391236	0.881433	0.131053	0.355144	0.959297	0.109733	0.650124	1	-0.0838218	0.835466	1	-0.0375305
500688	Adam4/Gm4787	a disintegrin and metallopeptidase domain 4	0.0725596	0.615352	-0.331335	0.483933	0.765349	0.178781	0.770718	1	-0.089693	0.62445	0.953568	0.131826	0.0188478	0.721469	-0.377285	0.747852	1	0.103663	0.446008	0.917354	-0.169657	0.091868	0.752639	0.425067	0.0966366	0.516071	-0.317337	0.499527	0.89583	-0.167789
498654	Adam5	a disintegrin and metallopeptidase domain 5	0.183587	0.69949	-0.461449	1	1	0	0.252876	0.650829	-0.230724	1	1	0	0.0351891	0.721469	-0.461449	1	1	0	0.365091	0.864035	-0.230724	1	1	0	0.0141666	0.284811	-0.461449	1	1	0
192271	Adam6	a disintegrin and metallopeptidase domain 6	1	1	0	1	1	0	1	1	0	1	1	0	1	1	0	1	1	0	1	1	0	1	1	0	1	1	0	1	1	0
29641	ADAM7	ADAM metallopeptidase domain 7	1	1	0	1	1	0	1	1	0	1	1	0	1	1	0	1	1	0	1	1	0	1	1	0	1	1	0	1	1	0
290834	ADAM9	ADAM metallopeptidase domain 9	0.82676	1	0.0423325	0.147108	0.463676	0.439461	0.787589	1	0.0323335	0.25596	0.651861	0.462866	0.880144	1	0.0300925	0.84251	1	-0.00651671	0.73795	1	0.0338569	0.0867117	0.752639	0.649329	0.918298	1	0.0292843	0.811734	1	-0.0577511
290338	ADAMDEC1	ADAM-like, decysin 1	1	1	0	1	1	0	1	1	0	1	1	0	1	1	0	1	1	0	1	1	0	1	1	0	1	1	0	1	1	0
79252	ADAMTS1	ADAM metallopeptidase with thrombospondin type 1 motif, 1	0.949818	1	0.0185492	0.00526822	0.235112	-0.594136	0.685224	1	0.0110447	0.735336	1	-0.0775487	0.809547	1	-0.0540127	0.0286528	1	-0.607958	0.979026	1	-0.0190522	0.720911	1	-0.131137	0.843867	1	0.0232788	0.0143127	0.279041	-0.6915
314655	ADAMTS10	ADAM metallopeptidase with thrombospondin type 1 motif, 10	0.142977	0.666728	-0.527169	0.00502134	0.235112	-1.50369	0.082862	0.424369	-0.348925	0.000470042	0.0243555	-1.20926	0.088997	0.746733	-0.403197	0.373924	1	-0.510523	0.0991084	0.661278	-0.360512	0.0343603	0.750579	-1.01903	0.0418216	0.391474	-0.417364	0.02599	0.330553	-1.05792
294809	Adamts12	ADAM metallopeptidase with thrombospondin type 1 motif, 12	0.579463	0.95379	-0.115734	0.0236149	0.282399	-0.447189	0.643914	0.979444	-0.0993309	0.18752	0.567726	-0.316166	0.524125	1	-0.100791	0.624239	1	-0.218908	0.4915	0.948363	-0.119735	0.846705	1	-0.0976051	0.642574	1	-0.0627059	0.0532255	0.416708	-0.527942
309837	ADAMTS14	ADAM metallopeptidase with thrombospondin type 1 motif, 14	0.31805	0.806199	-0.289806	0.147752	0.464589	0.413603	0.408931	0.813657	-0.155287	0.108777	0.436477	0.64632	0.0800817	0.7404	-0.299945	0.71324	1	-0.220408	0.235056	0.768195	-0.206622	0.0964818	0.752639	0.679395	0.161863	0.598725	-0.234928	0.779736	1	-0.123821
300474	ADAMTS15	ADAM metallopeptidase with thrombospondin type 1 motif, 15	0.320635	0.808832	0.176373	0.336909	0.667469	0.191825	0.0552457	0.360229	0.354647	0.508465	0.859613	0.181908	0.531797	1	-0.10145	0.688109	1	0.0155705	0.377078	0.871559	0.212122	0.858579	1	0.031988	0.796275	1	0.0486501	0.305319	0.73795	0.225663
361412	ADAMTS18	ADAM metallopeptidase with thrombospondin type 1 motif, 18	0.201428	0.709066	0.444227	1	1	0	0.00874134	0.171504	0.430931	1	1	0	0.844322	1	0.10069	1	1	0	0.120568	0.680364	0.363278	1	1	0	0.236948	0.702078	0.258156	1	1	0
361332	Adamts19	ADAM metallopeptidase with thrombospondin type 1 motif, 19	0.422648	0.83352	-0.227393	0.175165	0.499604	-0.337919	0.721408	1	-0.114393	0.10172	0.42615	-0.286397	0.273821	0.868428	-0.226696	0.595382	1	-0.137293	0.23456	0.768195	-0.258243	0.640251	1	-0.0978181	0.711978	1	-0.0828454	0.0409079	0.382229	-0.381331
287899	ADAMTS2	ADAM metallopeptidase with thrombospondin type 1 motif, 2	0.687529	1	-0.16982	0.0753536	0.363533	-0.412956	0.862737	1	0.00300906	0.891861	1	-0.0669053	0.273879	0.868428	-0.343315	0.0255807	1	-0.468	0.892972	1	-0.0545712	0.519646	1	-0.132288	0.406167	0.86693	-0.228684	0.0580755	0.429986	-0.45897
305253	ADAMTS3	ADAM metallopeptidase with thrombospondin type 1 motif, 3	0.181572	0.69949	-0.647476	0.230601	0.54902	-0.645174	0.224596	0.630308	-0.3909	0.214569	0.600141	-0.429465	0.10566	0.765461	-0.575321	0.677432	1	-0.382999	0.44299	0.915438	-0.317416	0.952169	1	-0.0920478	0.0236104	0.326367	-0.652134	0.0573477	0.428182	-0.823947
66015	ADAMTS4	ADAM metallopeptidase with thrombospondin type 1 motif, 4	0.400261	0.83352	0.200982	0.450126	0.732573	-0.187709	0.0368156	0.308382	0.373207	0.634316	0.961066	0.0590411	0.58422	1	-0.122479	0.0837532	1	-0.355815	0.205628	0.746186	0.277543	0.966083	1	-0.00104879	0.951377	1	0.00701461	0.168895	0.593478	-0.285585
304135	ADAMTS5	ADAM metallopeptidase with thrombospondin type 1 motif, 5	0.0300982	0.540742	-0.366926	0.94572	1	-0.0339691	0.208631	0.609616	-0.246444	0.807684	1	0.0686514	0.227693	0.84682	-0.261108	0.70651	1	-0.179766	0.533856	0.952018	-0.152073	0.452723	0.999005	0.219528	0.0279583	0.344067	-0.384037	0.365475	0.797669	-0.290535
315879	ADAMTS7	ADAM metallopeptidase with thrombospondin type 1 motif, 7	0.763812	1	-0.0696777	0.197536	0.516678	-0.519019	0.582788	0.932438	0.0720837	0.375466	0.764011	-0.210355	0.202869	0.824325	-0.20709	0.153158	1	-0.454696	0.782125	1	0.027985	0.557203	1	-0.18857	0.35628	0.833097	-0.142665	0.0330178	0.359016	-0.552132
312566	ADAMTS9	ADAM metallopeptidase with thrombospondin type 1 motif, 9	0.215672	0.720295	0.269921	0.191834	0.513184	-0.248098	0.0133843	0.203464	0.373178	0.967892	1	-0.0135156	0.86912	1	-0.0184907	0.287428	1	-0.305395	0.103615	0.665241	0.309097	0.921229	1	0.0565926	0.727905	1	0.0790536	0.180199	0.609026	-0.410994
308787	ADAMTSL3	ADAMTS-like 3	0.476415	0.876129	-0.17685	0.0188271	0.266591	-0.483676	0.236235	0.64421	-0.120245	0.0111377	0.131902	-0.380352	0.848198	1	-0.0711706	0.276405	1	-0.17597	0.737974	1	-0.0611704	0.000236328	0.574952	-0.487309	0.260806	0.729758	-0.179485	0.324173	0.757826	-0.181808
310670	ADAMTSL4	ADAMTS-like 4	0.0764401	0.615352	-0.456186	0.251247	0.572023	0.348809	0.45582	0.83564	-0.215596	0.139753	0.490013	0.375334	0.0144661	0.721469	-0.427503	0.940556	1	-0.0199633	0.108075	0.670987	-0.336436	0.722391	1	0.114088	0.125316	0.564287	-0.334116	0.18323	0.612324	0.353179
314626	ADAMTSL5	ADAMTS-like 5	0.239937	0.740898	-0.634365	0.123957	0.43445	0.458464	0.146432	0.531679	-0.402026	0.458619	0.819289	0.149603	0.204074	0.824566	-0.415258	0.048602	1	0.317254	0.240043	0.770891	-0.383621	0.328727	0.945287	0.206387	0.0750443	0.470994	-0.523172	0.0342751	0.363473	0.407696
171097	ADAP1	ArfGAP with dual PH domains 1	0.169851	0.69219	0.598297	0.0681057	0.351156	0.493769	0.0637151	0.38247	0.48351	0.389454	0.764011	0.177582	0.173071	0.812328	0.396942	0.210946	1	0.365632	0.0454096	0.612323	0.497158	0.922911	1	0.0685548	0.135446	0.564287	0.394623	0.0159351	0.288539	0.606285
56826	ADAP2	ArfGAP with dual PH domains 2	0.645882	1	0.0230216	0.0944357	0.392628	0.169393	0.919055	1	-0.0100972	0.877001	1	0.0135121	0.89874	1	0.0487137	0.151529	1	0.169793	0.63685	1	-0.0697164	0.632337	1	0.0786464	0.466222	0.916721	0.10561	0.369638	0.801517	0.151848
81635	ADAR	adenosine deaminase, RNA-specific	0.157149	0.67565	-0.276674	0.441107	0.72507	-0.13233	0.114549	0.483461	-0.223089	0.382735	0.764011	-0.275284	0.244682	0.857365	-0.1812	0.621894	1	0.0855786	0.204828	0.745187	-0.187948	0.578071	1	0.188192	0.0949076	0.513265	-0.223489	0.323337	0.756838	-0.383757
25367	ADARB1	adenosine deaminase, RNA-specific, B1	0.130011	0.656949	0.195942	0.0388746	0.308353	-0.374006	0.292282	0.694654	0.0945195	0.0180542	0.174101	-0.361559	0.142002	0.787598	0.16211	0.778286	1	-0.0644536	0.49561	0.950799	0.0729759	0.429015	0.987287	-0.14716	0.0245303	0.331304	0.20851	0.0601885	0.435154	-0.36885
117088	ADARB2	adenosine deaminase, RNA-specific, B2	0.845263	1	-0.0712168	0.899626	1	-0.022565	0.869485	1	-0.0490946	0.562312	0.905556	0.1986	0.887827	1	0.0613118	0.513073	1	-0.229425	0.639621	1	-0.144358	0.438566	0.991675	0.280632	0.889351	1	0.0772134	0.389927	0.818295	-0.313472
690810	ADAT1	adenosine deaminase, tRNA-specific 1	0.227501	0.731669	-0.37857	0.223089	0.540181	-0.134149	0.100243	0.458291	-0.275298	0.0578387	0.324759	-0.222646	0.107414	0.765689	-0.290383	0.487776	1	0.0491723	0.089699	0.654655	-0.280629	0.109788	0.755501	-0.23229	0.0730484	0.467196	-0.286501	0.843581	1	0.0403166
361453	ADAT2	adenosine deaminase, tRNA-specific 2	0.31363	0.801616	0.196628	0.0406215	0.313217	0.313191	0.0904122	0.440423	0.191428	0.288925	0.690037	0.181205	0.656593	1	0.0865423	0.194042	1	0.203666	0.281765	0.805245	0.142371	0.159522	0.824553	0.226316	0.305497	0.784233	0.146914	0.211714	0.646377	0.215164
100125374	ADAT3	adenosine deaminase, tRNA-specific 3	0.571087	0.94846	-0.0856826	0.148019	0.464912	-0.215158	0.561966	0.917503	0.0832458	0.739485	1	0.0316291	0.221526	0.843226	-0.235852	0.100978	1	-0.310048	0.884294	1	0.0307226	0.377897	0.970382	-0.15924	0.433355	0.890757	-0.167274	0.607635	0.948056	-0.148724
366473	ADC	arginine decarboxylase	0.0911755	0.626221	1.0477	0.0692536	0.353287	1.01503	0.000545184	0.0658474	1.10918	0.00357581	0.0692	0.99891	0.616336	1	0.303041	0.830594	1	0.0915139	0.0265123	0.612323	0.964882	0.299085	0.929794	0.482327	0.26519	0.736734	0.553554	0.0375339	0.372278	0.896181
366698	ADCK1	aarF domain containing kinase 1	0.178387	0.69949	-0.189558	0.117591	0.423818	0.131022	0.0278002	0.275313	-0.19846	0.462516	0.822541	0.0965093	0.730605	1	-0.0875925	0.531085	1	0.0723393	0.290609	0.812114	-0.126292	0.828479	1	-0.0253908	0.136009	0.565348	-0.158617	0.046499	0.394951	0.212696
312258	ADCK2	aarF domain containing kinase 2	0.446616	0.8525	-0.233714	0.0367415	0.305444	0.202554	0.721213	1	-0.076267	0.397094	0.765077	0.127275	0.206999	0.827134	-0.314724	0.358969	1	0.0988112	0.842387	1	-0.0595682	0.209615	0.864825	0.17043	0.135376	0.564287	-0.304476	0.479381	0.881568	0.107486
360887	ADCK3	aarF domain containing kinase 3	0.0907152	0.626221	-0.929206	0.0140056	0.252542	-1.56546	0.0019132	0.0935518	-0.966766	1.42303e-05	0.00567263	-1.551	0.755821	1	-0.248793	0.680088	1	-0.283702	0.0241283	0.612323	-0.91091	0.0208884	0.74747	-1.27132	0.30897	0.786849	-0.423483	0.144581	0.559338	-0.905708
308453	ADCK4	aarF domain containing kinase 4	0.00501698	0.452792	0.877807	0.0310585	0.295359	0.611662	0.000389377	0.0608333	0.795958	0.00168785	0.0465868	0.766135	0.329868	0.910537	0.357253	0.909034	1	-0.0590606	0.0386981	0.612323	0.664947	0.336043	0.946835	0.341143	0.0665987	0.454216	0.597264	0.168212	0.592915	0.50621
362943	ADCK5	aarF domain containing kinase 5	0.568985	0.947463	-0.149005	0.0446106	0.316239	-0.222821	0.926808	1	0.00866934	0.286934	0.688432	-0.204744	0.182612	0.817027	-0.265646	0.771515	1	-0.050785	0.882166	1	-0.0403622	0.0785404	0.752639	-0.328633	0.299489	0.776761	-0.194301	0.87825	1	0.020636
305509	ADCY1	adenylate cyclase 1 (brain)	0.283704	0.777765	0.201111	0.784067	1	0.0677507	0.140536	0.523283	0.270436	0.392575	0.764011	-0.346775	0.949146	1	0.0200568	0.312425	1	0.439605	0.245307	0.772776	0.235079	0.595721	1	0.240137	0.84508	1	0.0628627	0.715199	1	-0.141443
59320	ADCY10	adenylate cyclase 10 (soluble)	0.784325	1	0.103181	0.632206	0.907644	-0.0772625	0.839226	1	0.0518469	0.613416	0.944271	-0.124799	0.693139	1	0.0704558	0.926211	1	0.0519044	0.648579	1	0.0919586	0.714144	1	-0.104129	0.854316	1	0.0519895	0.925941	1	0.00256821
81636	ADCY2	adenylate cyclase 2 (brain)	0.0298764	0.540742	-0.591399	0.103017	0.404888	0.235151	0.0295486	0.281124	-0.496797	0.895347	1	-0.0431654	0.140464	0.78667	-0.297719	0.154522	1	0.296495	0.000890137	0.612323	-0.582606	0.812749	1	-0.0406689	0.296955	0.773265	-0.273633	0.109001	0.498382	0.360263
64508	ADCY3	adenylate cyclase 3	0.162994	0.682461	0.166409	0.733065	0.998088	0.0479599	0.479818	0.855902	0.072724	0.556287	0.900737	-0.0730918	0.0795083	0.7404	0.127937	0.363845	1	0.118749	0.451416	0.921335	0.0675105	0.434775	0.990267	-0.147883	0.0410394	0.388926	0.165785	0.250967	0.692253	0.211062
54223	ADCY4	adenylate cyclase 4	0.239643	0.740898	0.23593	0.229851	0.54803	-0.297704	0.0953784	0.448192	0.237026	0.805506	1	-0.079712	0.980137	1	0.0344626	0.0776171	1	-0.324452	0.646647	1	0.109227	0.266634	0.902202	-0.201181	0.217657	0.678042	0.217199	0.285302	0.718423	-0.231244
64532	ADCY5	adenylate cyclase 5	0.138482	0.664613	0.249871	0.212308	0.529	-0.0976947	0.00568571	0.144303	0.327971	0.643657	0.967815	0.0747468	0.810153	1	0.0313978	0.217111	1	-0.200537	0.0328024	0.612323	0.289156	0.271214	0.905286	-0.179885	0.69833	1	0.0805041	0.800604	1	0.0402606
25289	ADCY6	adenylate cyclase 6	0.513879	0.906502	-0.13337	0.0258859	0.285274	-0.351936	0.887667	1	0.0219036	0.102328	0.427327	-0.304301	0.0940367	0.750041	-0.21756	0.670337	1	-0.125076	0.87344	1	0.0101154	0.603702	1	-0.124431	0.102958	0.525248	-0.208704	0.0706552	0.454575	-0.37063
84420	ADCY7	adenylate cyclase 7	0.14089	0.665224	0.277413	0.221429	0.538299	-0.146894	0.0957554	0.448919	0.284335	0.556384	0.900737	-0.108755	0.848528	1	0.0552874	0.741334	1	-0.0862561	0.494209	0.950163	0.159192	0.976745	1	0.0119462	0.229142	0.69276	0.231428	0.274201	0.711048	-0.223844
29241	ADCY8	adenylate cyclase 8 (brain)	0.0647712	0.603701	1.38595	0.0225094	0.280421	-0.327189	0.00722045	0.159273	1.13391	0.0136473	0.148221	-0.392647	0.1536	0.794983	0.818768	0.745974	1	0.0183052	0.0104561	0.612323	1.12642	0.535993	1	-0.136612	0.064742	0.451592	0.910424	0.138093	0.548444	-0.315357
302950	Adcy9	adenylate cyclase 9	0.677832	1	-0.0346098	0.0729836	0.358605	-0.220141	0.721734	1	0.0242307	0.436954	0.802819	-0.287465	0.476529	0.975082	-0.094331	0.778974	1	0.018233	0.787998	1	0.0257795	0.55377	1	0.256467	0.527934	0.953214	-0.083756	0.243206	0.684831	-0.566352
24166	ADCYAP1	adenylate cyclase activating polypeptide 1 (pituitary)	0.576383	0.951743	0.289263	0.222933	0.54005	-0.911652	0.824933	1	0.0745619	0.0934131	0.410535	-0.594878	0.564402	1	0.263456	0.382266	1	-0.313635	0.958346	1	-0.0761505	0.232912	0.886165	-0.526438	0.346793	0.823322	0.478086	0.0956698	0.492679	-0.688052
24167	ADCYAP1R1	adenylate cyclase activating polypeptide 1 (pituitary) receptor type I	0.668976	1	-0.24673	0.000603458	0.219082	-0.550021	0.738656	1	-0.112164	0.00577952	0.0918711	-0.518894	0.444987	0.962785	-0.331597	0.743187	1	-0.126646	0.820356	1	-0.115104	0.282107	0.91423	-0.264289	0.377192	0.84384	-0.279546	0.0365964	0.368815	-0.500913
24170	ADD1	adducin 1 (alpha)	0.0663836	0.607024	-0.190672	0.0442935	0.316239	-0.258872	0.0042377	0.128539	-0.212713	0.00123206	0.0383584	-0.248635	0.694482	1	-0.0408536	0.77701	1	-0.0680875	0.0373921	0.612323	-0.181394	0.251419	0.894679	-0.141827	0.338681	0.816652	-0.0938006	0.0313291	0.354607	-0.222619
24171	ADD2	adducin 2 (beta)	0.364759	0.83352	-0.512028	0.0310311	0.295359	-0.687648	0.102973	0.464174	-0.50612	0.0407549	0.270061	-0.793501	0.732344	1	-0.202566	0.858746	1	-0.0499538	0.3469	0.854567	-0.375707	0.423348	0.986362	-0.465082	0.262815	0.732888	-0.37255	0.264161	0.7032	-0.503717
25230	ADD3	adducin 3 (gamma)	0.00937901	0.471776	-0.437153	0.0715192	0.356613	-0.616866	0.0369718	0.308642	-0.345085	0.0225639	0.196655	-0.631703	0.26517	0.861967	-0.229324	0.894919	1	-0.0880295	0.169169	0.707993	-0.2875	0.531779	1	-0.250421	0.0425237	0.392638	-0.341122	0.0515305	0.411416	-0.606356
24172	ADH1C	alcohol dehydrogenase 1C (class I), gamma polypeptide	0.778328	1	0.0883356	0.831399	1	0.0586008	0.882741	1	0.0455433	0.659734	0.978987	-0.0818269	0.776283	1	0.0544919	0.435545	1	0.16833	0.420338	0.901883	0.241991	0.521504	1	-0.125854	0.742241	1	-0.12031	0.313735	0.747051	0.213289
29646	ADH4	alcohol dehydrogenase 4 (class II), pi polypeptide	0.147713	0.670277	0.392944	0.0593029	0.339244	-0.565675	0.166724	0.556351	0.35271	0.000212846	0.017179	-0.64982	0.538024	1	0.162557	0.96382	1	-0.0318956	0.200232	0.740753	0.355408	0.0959222	0.752639	-0.428882	0.397262	0.859422	0.209291	0.154189	0.573555	-0.364031
100145871	ADH5	alcohol dehydrogenase 5 (class III), chi polypeptide	0.0967044	0.62762	-0.262283	0.259532	0.580791	-0.160213	0.0127747	0.199025	-0.223994	0.351144	0.743824	-0.150026	0.39536	0.959367	-0.109441	0.77973	1	-0.00576303	0.0516241	0.618368	-0.212959	0.180999	0.840121	-0.208333	0.192568	0.642395	-0.16047	0.992555	1	-0.00380994
310903	ADH6	alcohol dehydrogenase 6 (class V)	0.422647	0.83352	-0.179639	0.422647	0.708159	0.182555	0.45421	0.834589	-0.0898194	0.899759	1	-0.0261597	0.25281	0.857365	-0.0898194	0.0929956	1	0.208715	0.550415	0.952018	-0.0598796	0.537325	1	0.104264	0.129883	0.564287	-0.179639	0.359964	0.79181	0.139143
295498	Adh6a	alcohol dehydrogenase 6A (class V)	0.341537	0.828188	-0.291496	0.422647	0.708159	0.18504	0.67859	1	-0.0481614	0.0729012	0.364506	0.179865	0.212072	0.834562	-0.262776	0.982266	1	0.00517505	0.957206	1	-0.00605926	0.358278	0.961467	0.12681	0.0594422	0.438795	-0.389082	0.353065	0.784115	0.11991
171178	ADH7	alcohol dehydrogenase 7 (class IV), mu or sigma polypeptide	0.183533	0.69949	0.386924	0.602329	0.87973	-0.151796	0.269498	0.666408	0.206752	0.717772	1	-0.0758981	0.0841238	0.745898	0.277759	0.489677	1	-0.161669	0.0782374	0.646702	0.330727	0.748626	1	0.0425145	0.229713	0.693127	0.217701	0.115588	0.511128	-0.2735
362474	ADHFE1	alcohol dehydrogenase, iron containing, 1	0.241217	0.740966	-0.30136	0.0462131	0.316239	-1.83637	0.0572515	0.365577	-0.265302	0.00309914	0.063665	-1.4353	0.49202	0.985428	-0.137059	0.337557	1	-0.58264	0.323692	0.837761	-0.174912	0.10769	0.753165	-0.999607	0.0881485	0.501457	-0.260568	0.0098958	0.247105	-1.50941
298934	ADI1	acireductone dioxygenase 1	0.984149	1	-0.00291148	0.0644611	0.345587	-0.560591	0.906576	1	-0.00437278	0.00503197	0.0849437	-0.496271	0.943036	1	-0.011041	0.516394	1	-0.150379	0.672118	1	0.0366111	0.087507	0.752639	-0.394715	0.636051	1	-0.0446605	0.106798	0.494694	-0.381426
246253	ADIPOQ	adiponectin, C1Q and collagen domain containing	0.930797	1	0.042642	0.422648	0.708159	-0.241343	0.94905	1	-0.101072	0.806883	1	0.0233092	0.808277	1	0.00106658	0.114474	1	-0.385324	0.751825	1	0.0628964	0.398077	0.979785	-0.216659	0.900683	1	-0.0535895	0.573599	0.9239	-0.145356
289036	ADIPOR1	adiponectin receptor 1	0.0317833	0.540748	0.0757754	0.0433197	0.315179	-0.0430033	0.0404399	0.320025	0.0624132	0.279131	0.678697	-0.0963532	0.164364	0.803969	0.0415377	0.594836	1	0.0473536	0.0165187	0.612323	0.0666257	0.159865	0.824553	-0.133345	0.153901	0.588417	0.0438	0.449686	0.857192	0.0740082
312670	ADIPOR2	adiponectin receptor 2	0.288687	0.782806	0.295124	0.0513067	0.324156	0.325396	0.90499	1	0.0634657	0.815072	1	-0.00541494	0.0826063	0.745898	0.380106	0.212554	1	0.363175	0.642649	1	0.0926085	0.301496	0.930551	0.360069	0.122662	0.561018	0.350373	0.939646	1	0.0845798
25368	ADK	adenosine kinase	0.270441	0.763954	-0.142476	0.00191054	0.219304	-0.352455	0.0300409	0.283527	-0.210183	0.0131516	0.145531	-0.27057	0.898011	1	-0.0109733	0.283697	1	-0.140215	0.147868	0.690644	-0.161585	0.21342	0.86718	-0.173513	0.614859	0.99672	-0.0546097	0.00389841	0.190303	-0.31587
25026	ADM	adrenomedullin	0.561685	0.941579	0.369692	0.0926606	0.390114	0.717116	0.248364	0.650829	0.45771	0.0111121	0.13186	1.11876	0.838709	1	0.175019	0.590505	1	-0.205446	0.392263	0.882676	0.367829	0.314478	0.93739	0.599883	0.556	0.956488	0.212773	0.49878	0.894882	0.421671
399475	ADM2	adrenomedullin 2	0.598326	0.967847	0.0463523	0.773335	1	0.0515849	0.254921	0.65224	0.243689	0.825349	1	-0.12103	0.432243	0.962785	-0.16286	0.683296	1	0.177121	0.135962	0.680407	0.270613	0.389767	0.979166	-0.269701	0.275892	0.748351	-0.197318	0.286733	0.720711	0.339983
64622	ADNP	activity-dependent neuroprotector homeobox	0.457533	0.860653	0.0840777	0.752875	1	-0.0391117	0.504278	0.875328	-0.073431	0.503846	0.856251	-0.0707994	0.0857484	0.745898	0.196334	0.747359	1	0.0303488	0.88448	1	-0.0258645	0.411616	0.982623	0.101183	0.247462	0.712354	0.15091	0.218385	0.656504	-0.153779
307236	ADNP2	ADNP homeobox 2	0.794909	1	-0.0265714	0.197679	0.516711	0.175525	0.2291	0.636264	-0.102024	0.688139	0.999881	0.0635218	0.401159	0.961035	0.04078	0.175768	1	0.115039	0.938889	1	-0.0237352	0.0487166	0.750579	0.210162	0.777587	1	-0.0232509	0.915141	1	0.0248839
309732	ADO	2-aminoethanethiol (cysteamine) dioxygenase	0.561466	0.941402	0.2856	0.534437	0.815105	-0.099653	0.450707	0.834589	0.210862	0.306126	0.695285	-0.271604	0.543059	1	0.163831	0.489259	1	0.129063	0.66554	1	0.119729	0.674424	1	-0.19589	0.302275	0.780434	0.290768	0.961598	1	0.0487232
29290	ADORA1	adenosine A1 receptor	0.717357	1	0.0812893	0.0203517	0.272048	-0.30164	0.601363	0.946071	-0.0936489	0.0999815	0.422882	-0.351049	0.276201	0.869606	0.199465	0.744977	1	0.00652915	0.625075	1	-0.121277	0.816619	1	-0.103654	0.274249	0.747274	0.237839	0.234561	0.674987	-0.312826
25369	ADORA2A	adenosine A2a receptor	0.285149	0.779648	0.46388	0.441327	0.725183	-0.163634	0.0293724	0.280231	0.475552	0.419535	0.787728	0.210446	0.558767	1	0.178581	0.0946235	1	-0.348516	0.101285	0.663165	0.402547	0.750002	1	-0.0507726	0.268277	0.740487	0.279377	0.583209	0.930988	-0.158884
29316	ADORA2B	adenosine A2b receptor	0.81907	1	-0.108269	0.684232	0.953894	-0.147153	0.138982	0.52191	-0.441249	0.163549	0.530319	-0.338358	0.281468	0.875828	0.434735	0.505297	1	0.204614	0.423167	0.902009	-0.325432	0.712023	1	-0.0782032	0.680316	1	0.214991	0.760809	1	-0.113531
25370	ADORA3	adenosine A3 receptor	0.6207	0.984587	0.134312	0.517147	0.799091	0.196054	0.280021	0.680377	0.163426	0.824177	1	-0.019813	0.985505	1	0.0684721	0.51207	1	0.130096	0.864462	1	0.046191	0.8001	1	-0.04994	0.344288	0.822102	0.16542	0.203121	0.635757	0.282755
315722	ADPGK	ADP-dependent glucokinase	0.0184004	0.509491	0.53671	0.0119333	0.248824	0.533693	3.53423e-05	0.0273581	0.505976	0.000277707	0.01907	0.460587	0.466467	0.969386	0.21423	0.460683	1	0.155423	0.0152292	0.612323	0.451525	0.102483	0.752639	0.308329	0.1145	0.546094	0.325255	0.00833713	0.229353	0.4307
25371	ADPRH	ADP-ribosylarginine hydrolase	0.209832	0.71617	-0.206118	0.110004	0.414004	0.130394	0.183513	0.581461	-0.150195	0.0280645	0.221227	0.291401	0.223552	0.844538	-0.162312	0.287105	1	-0.146404	0.255515	0.783276	-0.128163	0.629915	1	0.0956647	0.106243	0.531288	-0.182124	0.578362	0.92707	0.0830623
290880	ADPRHL1	ADP-ribosylhydrolase like 1	0.0865414	0.624514	0.343355	0.037806	0.306719	0.391808	0.779135	1	-0.0445669	0.463596	0.823098	0.101721	0.00645238	0.721469	0.529629	0.0278947	1	0.378996	0.696482	1	0.10816	0.442038	0.994142	0.159593	0.116497	0.550042	0.396882	0.0190879	0.299524	0.392454
362600	ADPRHL2	ADP-ribosylhydrolase like 2	0.158538	0.678791	0.239318	0.240492	0.560962	0.234764	0.0291015	0.279466	0.27998	0.263785	0.659522	0.24237	0.884588	1	0.0420464	0.948567	1	0.0273725	0.0812487	0.646725	0.254787	0.870654	1	-0.0242098	0.485565	0.931421	0.0918731	0.173355	0.598586	0.348888
287406	ADPRM	ADP-ribose/CDP-alcohol diphosphatase, manganese-dependent	0.651844	1	0.10521	0.315108	0.644057	0.113633	0.877524	1	0.0050843	0.479756	0.837688	0.125551	0.330871	0.910723	0.112844	0.973169	1	0.041129	0.926138	1	-0.015945	0.693421	1	-0.0690739	0.172937	0.614656	0.160465	0.20921	0.644171	0.238267
29412	ADRA1A	adrenoceptor alpha 1A	0.189063	0.701308	-0.407031	0.00613326	0.236709	0.419131	0.789936	1	-0.117825	0.155114	0.516946	0.612953	0.0416758	0.721469	-0.402902	0.821343	1	-0.113229	0.128745	0.680364	-0.343098	0.034087	0.750579	0.884291	0.411073	0.870833	-0.237509	0.518163	0.910662	-0.298586
24173	ADRA1B	adrenoceptor alpha 1B	0.164035	0.684274	0.230671	0.19765	0.516711	0.575699	0.243455	0.650829	0.191181	0.21203	0.599238	0.314214	0.518505	1	0.140308	0.399297	1	0.265853	0.8046	1	0.0631546	0.676702	1	0.163683	0.0685337	0.457185	0.278012	0.0392117	0.376644	0.605372
29413	ADRA1D	adrenoceptor alpha 1D	0.908781	1	-0.0665166	0.220527	0.537356	0.393337	0.443314	0.834589	-0.316722	0.156333	0.518497	0.24568	0.624209	1	0.227938	0.311518	1	0.139397	0.509373	0.952018	-0.228669	0.351216	0.957452	0.182275	0.693551	1	0.132558	0.0649063	0.44481	0.339422
25083	Adra2a	adrenoceptor alpha 2A	0.0432585	0.56645	1.35235	1	1	0.413908	0.000180975	0.0428056	1.31726	0.0128537	0.143635	0.461327	0.532824	1	0.409166	0.646146	1	-0.0897786	0.0176743	0.612323	1.19754	0.29019	0.918675	0.31546	0.153307	0.588023	0.730278	0.373021	0.803226	0.222297
24174	ADRA2B	adrenoceptor alpha 2B	0.895693	1	-0.0742451	0.506678	0.788875	-0.215629	0.453921	0.834589	-0.148023	0.509368	0.860541	-0.1753	0.707558	1	0.178502	0.67745	1	-0.0331962	0.54125	0.952018	-0.148518	0.286845	0.916061	-0.24344	0.814727	1	0.0844321	0.931076	1	-0.0416884
24175	ADRA2C	adrenoceptor alpha 2C	0.385827	0.83352	0.408147	0.0341345	0.302137	1.2106	0.218412	0.622519	0.324196	0.00173806	0.0470612	1.61696	0.578228	1	0.275371	0.505443	1	-0.280045	0.335807	0.845388	0.311744	0.321539	0.941184	0.886695	0.349353	0.826786	0.296259	0.300135	0.732592	0.769542
24925	ADRB1	adrenoceptor beta 1	0.0857122	0.624514	0.611708	0.0977717	0.397577	0.7332	0.175133	0.568438	0.301	0.00445328	0.0791642	0.735031	0.0078238	0.721469	0.525338	0.876152	1	0.0873459	0.196325	0.738649	0.335143	0.139084	0.794324	0.523615	0.00424704	0.212963	0.552012	0.146638	0.561333	0.48371
24176	ADRB2	adrenoceptor beta 2, surface	0.0152589	0.509491	1.01406	0.0637552	0.345099	1.33627	0.0354758	0.302392	0.679226	0.0907588	0.404704	0.782968	0.0793093	0.7404	0.668406	0.164705	1	0.754403	0.142742	0.685438	0.563892	0.504194	1	0.4048	0.00130191	0.155132	0.899382	0.000467856	0.102148	1.44393
25645	ADRB3	adrenoceptor beta 3	1	1	0	1	1	0	1	1	0	1	1	0	1	1	0	1	1	0	1	1	0	1	1	0	1	1	0	1	1	0
25238	ADRBK1	adrenergic, beta, receptor kinase 1	0.227773	0.731881	-0.178798	0.000628036	0.219082	0.327785	0.0362109	0.305601	-0.175275	0.092486	0.40857	0.190427	0.646016	1	-0.0970971	0.0495791	1	0.191076	0.233334	0.7674	-0.132165	0.125348	0.773098	0.179514	0.161013	0.597398	-0.137424	0.0030586	0.17538	0.275439
25372	ADRBK2	adrenergic, beta, receptor kinase 2	0.967144	1	-0.0154672	0.0183385	0.266428	-0.421685	0.81573	1	0.0190245	0.186818	0.566812	-0.559174	0.739035	1	-0.0559033	0.714879	1	0.0603537	0.867609	1	-0.0477695	0.784058	1	0.102639	0.949868	1	0.0200094	0.180779	0.609246	-0.690598
65138	ADRM1	adhesion regulating molecule 1	0.192974	0.702817	0.196415	0.18644	0.508271	0.212103	0.414145	0.818632	0.14506	0.297222	0.693557	0.2229	0.381199	0.949098	0.110909	0.966178	1	0.0163538	0.376446	0.87154	0.149832	0.772794	1	-0.0648138	0.360268	0.83672	0.131906	0.119466	0.518531	0.356668
315150	ADSL	adenylosuccinate lyase	0.610925	0.976796	0.0526282	0.0967427	0.396041	0.184449	0.495246	0.869192	0.0430078	0.157329	0.520155	0.209512	0.919619	1	0.0322625	0.951729	1	0.0163252	0.723342	1	-0.0238853	0.734528	1	0.0488819	0.216951	0.67715	0.101604	0.206209	0.640128	0.210846
289276	ADSS	adenylosuccinate synthase	0.128531	0.656148	-0.294092	0.0264151	0.286355	-0.299822	0.0196581	0.239297	-0.263869	0.105743	0.434002	-0.198853	0.380065	0.948918	-0.150089	0.318088	1	-0.167469	0.146111	0.689584	-0.205511	0.715821	1	-0.0747839	0.0628986	0.447437	-0.226568	0.00148073	0.142468	-0.347145
361228	ADTRP	androgen-dependent TFPI-regulating protein	0.847998	1	0.0662254	0.185318	0.506891	-0.348933	0.197006	0.595322	0.303998	0.413405	0.780582	-0.216113	0.350352	0.92733	-0.11484	0.425722	1	-0.132821	0.877583	1	0.0873493	0.188187	0.846559	-0.307893	0.847344	1	0.0419286	0.62416	0.957726	-0.157351
305494	AEBP1	AE binding protein 1	0.143969	0.666728	0.217394	0.0532711	0.327886	-0.701839	0.0169073	0.223376	0.288397	0.351466	0.744182	-0.2303	0.812801	1	0.00328635	0.0243787	1	-0.613869	0.188938	0.728466	0.213942	0.229356	0.88198	-0.349949	0.432597	0.89056	0.10068	0.0165312	0.289575	-0.633279
297705	Aebp2	AE binding protein 2	0.22247	0.726894	-0.22837	0.162973	0.485194	0.131021	0.0760277	0.407668	-0.286894	0.712846	1	-0.0538101	0.93652	1	-0.0131522	0.371141	1	0.21209	0.0958692	0.659425	-0.282422	0.394868	0.979785	0.238836	0.742462	1	-0.045963	0.79137	1	-0.055055
361594	AEN	apoptosis enhancing nuclease	0.0424443	0.564993	0.617795	0.0836968	0.3785	0.63992	0.000239209	0.047686	0.619158	0.232034	0.625186	0.342474	0.588819	1	0.153281	0.156328	1	0.378212	0.0205048	0.612323	0.550544	0.636074	1	0.147123	0.177836	0.621274	0.324731	0.00449168	0.193165	0.733026
29466	AES	amino-terminal enhancer of split	0.259045	0.753629	0.43185	0.43286	0.717528	-0.127364	0.0477984	0.343831	0.458204	0.854232	1	0.00838118	0.660396	1	0.137402	0.53011	1	-0.172033	0.146547	0.689584	0.380943	0.428842	0.987248	-0.262319	0.307935	0.786272	0.249443	0.771505	1	0.0804043
140935	AFAP1	actin filament associated protein 1	0.501146	0.895508	-0.169199	0.886451	1	-0.0383185	0.906885	1	-0.0245064	0.533935	0.882635	-0.119092	0.257373	0.857711	-0.21053	0.60535	1	0.11679	0.911473	1	-0.036145	0.673757	1	0.153641	0.248134	0.712654	-0.211399	0.590597	0.936836	-0.192727
291565	AFAP1L1	actin filament associated protein 1-like 1	0.713742	1	-0.106769	0.254672	0.575055	-0.616736	0.824666	1	-0.0163711	0.49181	0.847172	-0.296355	0.235053	0.854629	-0.191112	0.211427	1	-0.54472	0.728165	1	-0.0687939	0.541502	1	-0.228839	0.54788	0.953214	-0.107136	0.0958773	0.49329	-0.668255
305152	AFF1	AF4/FMR2 family, member 1	0.0909464	0.626221	0.68896	0.99996	1	5.68548e-06	0.016305	0.220091	0.583959	0.708352	1	-0.129818	0.179132	0.81636	0.401343	0.708344	1	0.0888196	0.0170947	0.612323	0.583513	0.317171	0.939051	0.560104	0.144993	0.577735	0.433881	0.317177	0.751355	-0.573764
363220	AFF3	AF4/FMR2 family, member 3	0.123731	0.655701	-0.699325	0.126118	0.436462	-0.529411	0.125419	0.502327	-0.372704	0.0339646	0.244473	-0.452923	0.0155175	0.721469	-0.529696	0.69087	1	-0.226289	0.0915526	0.657866	-0.446186	0.479992	1	-0.233907	0.0160448	0.292577	-0.553939	0.0337932	0.361494	-0.521908
303132	AFF4	AF4/FMR2 family, member 4	0.154249	0.674252	0.235118	0.285144	0.608793	0.193681	0.264019	0.660436	0.181725	0.719561	1	0.168259	0.464436	0.96796	0.150439	0.772233	1	0.0707292	0.172653	0.711113	0.220168	0.162882	0.827328	0.464202	0.556287	0.956635	0.125671	0.53722	0.917997	-0.190858
361436	Afg3l1	AFG3(ATPase family gene 3)-like 1 (yeast)	0.132528	0.658185	0.161305	0.217112	0.533302	0.244702	0.236109	0.64421	0.152325	0.0420877	0.275145	0.283532	0.629764	1	0.0410801	0.931197	1	-0.0216895	0.319962	0.835198	0.141052	0.338209	0.947882	0.159529	0.437488	0.892236	0.0847217	0.291777	0.724953	0.172454
307350	AFG3L2	AFG3 ATPase family member 3-like 2 (S. cerevisiae)	0.630901	0.992745	-0.0372281	0.0142582	0.252542	0.198603	0.112758	0.47959	-0.177799	1	1	-0.0297854	0.24212	0.857365	0.134183	0.0689878	1	0.256267	0.281387	0.805094	-0.15615	0.946826	1	-0.0358808	0.529857	0.953214	0.104383	0.0456844	0.393224	0.309977
282708	AFM	afamin	0.589404	0.961646	0.191585	0.464242	0.746205	0.544457	0.196982	0.595322	0.177198	0.360754	0.752344	0.218739	0.938693	1	-0.0192433	0.513782	1	0.204747	0.442938	0.915438	0.165908	0.840294	1	0.0946589	0.60678	0.99109	0.0783281	0.109439	0.499531	0.59096
688283	Afmid	arylformamidase	0.0565837	0.593786	-0.133438	0.0233387	0.282002	0.516296	0.290851	0.693417	-0.0553612	0.232785	0.625683	0.21886	0.0222515	0.721469	-0.129433	0.0252096	1	0.362036	0.538524	0.952018	-0.0459938	0.325642	0.944254	0.183584	0.000592677	0.13597	-0.149042	0.000326615	0.0933525	0.526344
24177	AFP	alpha-fetoprotein	0.422647	0.83352	0.195173	0.88973	1	-0.0645077	0.19768	0.595322	0.195173	0.474188	0.833164	-0.226396	0.45421	0.962785	0.0975865	0.666639	1	0.161888	0.135389	0.680364	0.195173	0.563638	1	-0.142222	0.536795	0.953214	0.0975865	0.793236	1	0.0562122
290923	AGA	aspartylglucosaminidase	0.198398	0.707827	0.113913	0.0131326	0.252542	-0.516773	0.0634061	0.381959	0.131854	0.00889954	0.117215	-0.372871	0.803546	1	0.0244257	0.147248	1	-0.23866	0.202404	0.741539	0.103452	0.0368266	0.750579	-0.345584	0.411076	0.870833	0.0625549	0.0158832	0.28839	-0.375032
316611	AGAP1	ArfGAP with GTPase domain, ankyrin repeat and PH domain 1	0.59618	0.966064	0.14184	0.688846	0.958106	0.0190144	0.660567	0.992861	0.0897852	0.662688	0.980543	-0.0444154	0.33728	0.916382	0.143654	0.572287	1	0.0549542	0.325477	0.838006	0.136977	0.471677	1	0.119134	0.613558	0.995606	0.082676	0.565979	0.923051	-0.0966066
65218	AGAP2	ArfGAP with GTPase domain, ankyrin repeat and PH domain 2	0.269801	0.763954	0.582986	0.9747	1	0.00595292	0.133309	0.514155	0.431569	0.408249	0.775946	0.107438	0.182285	0.817027	0.474225	0.427315	1	-0.154234	0.245582	0.772776	0.363496	0.334661	0.946835	-0.207543	0.0562075	0.430215	0.521421	0.315669	0.749662	0.197897
362300	AGAP3	ArfGAP with GTPase domain, ankyrin repeat and PH domain 3	0.00707024	0.471776	0.797418	0.0135518	0.252542	-0.386469	0.00164535	0.0886658	0.67916	0.21799	0.604424	-0.257194	0.223024	0.844538	0.406534	0.342309	1	-0.198199	0.0153178	0.612323	0.628433	0.0810229	0.752639	-0.349803	0.0396046	0.383684	0.530884	0.450473	0.858222	-0.188463
362562	Agbl4	ATP/GTP binding protein-like 4	0.0186361	0.509491	-0.494114	0.347532	0.679347	-0.309517	0.0467687	0.341833	-0.393686	0.0174577	0.170767	-0.432672	0.217894	0.838586	-0.275815	0.534975	1	0.0835639	0.00366999	0.612323	-0.490649	0.330601	0.945856	-0.271146	0.29908	0.775949	-0.226632	0.489736	0.888389	-0.154741
362710	AGBL5	ATP/GTP binding protein-like 5	0.0315677	0.540742	-0.367611	0.0296677	0.292227	-0.50463	0.128525	0.507838	-0.194649	0.0264581	0.21446	-0.358295	0.0236373	0.721469	-0.28849	0.239317	1	-0.25308	0.235669	0.768238	-0.187704	0.267308	0.903069	-0.223514	0.00226031	0.182712	-0.340953	0.00286839	0.173391	-0.484908
81722	AGER	advanced glycosylation end product-specific receptor	0.362376	0.83352	0.0900353	0.0221209	0.278433	-0.670771	0.979494	1	0.00598027	0.506458	0.858327	-0.275782	0.294338	0.887809	0.0898343	0.147685	1	-0.485578	0.980238	1	0.00656225	0.125866	0.773441	-0.541309	0.270738	0.743296	0.115411	0.4071	0.824221	-0.383248
363266	AGFG1	ArfGAP with FG repeats 1	0.0826798	0.617992	0.248988	0.00943394	0.245897	0.680326	0.443214	0.834589	0.0753708	0.0202995	0.186161	0.403356	0.0212524	0.721469	0.259933	0.0358343	1	0.370081	0.408158	0.891717	0.114145	0.0180511	0.74747	0.428512	0.031494	0.358039	0.246612	0.00439864	0.192094	0.509627
304375	Agfg2	ArfGAP with FG repeats 2	0.0582742	0.596709	0.590209	0.0839745	0.379031	0.259001	0.00437753	0.129293	0.490113	0.019471	0.181197	0.324647	0.152694	0.794977	0.3484	0.764252	1	-0.0497188	0.0132205	0.612323	0.465971	0.306252	0.933167	0.182659	0.0384821	0.378892	0.403743	0.326306	0.76019	0.167985
502749	AGK	acylglycerol kinase	0.242363	0.741902	-0.17985	0.0232454	0.282002	0.329514	0.294639	0.69784	-0.0734645	0.312187	0.702619	0.127803	0.427315	0.962785	-0.126459	0.000913958	1	0.271876	0.827873	1	-0.0297969	0.0318216	0.750338	0.221994	0.0615057	0.443575	-0.216694	0.0224994	0.317313	0.240746
362029	AGL	amylo-alpha-1, 6-glucosidase, 4-alpha-glucanotransferase	0.338499	0.82458	-0.216449	0.137328	0.450611	-0.231279	0.0397593	0.317448	-0.298301	0.0453893	0.286538	-0.388592	0.923791	1	-0.0109307	0.474292	1	0.128987	0.1794	0.719087	-0.230788	0.858336	1	-0.0746385	0.559444	0.958484	-0.0887378	0.272493	0.709564	-0.243175
298607	AGMAT	agmatine ureohydrolase (agmatinase)	0.548834	0.932243	0.18553	0.174298	0.498454	0.408653	0.132415	0.512872	0.585505	0.0103518	0.126646	0.974806	0.427288	0.962785	-0.424122	0.202449	1	-0.557387	0.181527	0.721449	0.548367	0.254255	0.895266	0.612733	0.4916	0.937088	-0.309042	0.974908	1	-0.0649405
362732	AGMO	alkylglycerol monooxygenase	0.202805	0.709192	0.448974	0.489647	0.771604	-0.359475	0.161035	0.550281	0.426587	0.463352	0.823098	-0.188366	0.616893	1	0.246874	0.429487	1	-0.0822007	0.746508	1	0.111385	0.204714	0.859516	-0.335722	0.0763069	0.474619	0.562076	0.645169	0.971548	-0.113942
406165	AGPAT1	1-acylglycerol-3-phosphate O-acyltransferase 1	0.335194	0.822793	0.146225	0.359814	0.688834	-0.115098	0.255778	0.653548	0.169602	0.875277	1	0.00941327	0.782016	1	0.0275346	0.398537	1	-0.166835	0.185871	0.725495	0.187736	0.518035	1	-0.119664	0.808155	1	0.0242008	0.910714	1	-0.0479085
311821	AGPAT2	1-acylglycerol-3-phosphate O-acyltransferase 2	0.142928	0.666728	0.340793	0.0400289	0.31151	0.401348	0.0028888	0.11057	0.461356	0.0644858	0.343432	0.346688	0.871184	1	0.0190597	0.744313	1	0.148746	0.0586914	0.619975	0.38038	0.776237	1	0.0972253	0.545991	0.953214	0.120551	0.0250246	0.32385	0.469267
294324	AGPAT3	1-acylglycerol-3-phosphate O-acyltransferase 3	0.422047	0.83352	-0.0866168	0.038107	0.306838	-0.144058	0.338601	0.745973	-0.0536931	0.119859	0.456558	-0.241294	0.433864	0.962785	-0.0497552	0.721216	1	0.0749615	0.570463	0.96453	-0.0356939	0.0671254	0.752639	-0.283608	0.187561	0.634519	-0.0854057	0.597083	0.941593	0.0841059
170919	AGPAT4	1-acylglycerol-3-phosphate O-acyltransferase 4	0.790394	1	-0.0169851	0.123251	0.433939	0.106205	0.710846	1	-0.0281782	0.887674	1	-0.0507808	0.97537	1	-0.00548981	0.454684	1	0.187388	0.515507	0.952018	-0.0406081	0.315576	0.938251	-0.193078	0.769932	1	0.0124004	0.0761805	0.45988	0.344818
306582	AGPAT5	1-acylglycerol-3-phosphate O-acyltransferase 5	0.939291	1	0.0128823	0.00144286	0.219082	0.267703	0.267621	0.664317	-0.186123	0.846316	1	0.00423969	0.218993	0.839658	0.228339	0.0247788	1	0.304768	0.481189	0.942238	-0.122445	0.426034	0.986499	0.116267	0.418268	0.877923	0.149399	0.0760557	0.45988	0.254438
290843	AGPAT6	1-acylglycerol-3-phosphate O-acyltransferase 6	0.0444995	0.568226	0.408002	0.135773	0.448476	0.225415	0.0936197	0.447598	0.237233	0.0855207	0.39246	0.136885	0.03513	0.721469	0.334868	0.128355	1	0.124061	0.15252	0.69486	0.222707	0.18806	0.846559	0.113503	0.00355553	0.206886	0.375995	0.00974365	0.247105	0.198895
305166	AGPAT9	1-acylglycerol-3-phosphate O-acyltransferase 9	0.0799859	0.615693	0.680575	0.00597712	0.236709	2.34896	0.00812715	0.166754	0.574198	0.000377122	0.0220621	1.87901	0.167459	0.808756	0.395879	0.269268	1	0.833378	0.0121709	0.612323	0.563797	0.0208462	0.74747	1.60965	0.0808482	0.487379	0.440137	0.0217181	0.314092	1.64345
300723	AGPHD1	aminoglycoside phosphotransferase domain containing 1	0.446624	0.8525	-0.421535	0.25069	0.571358	-0.295279	0.140367	0.523283	-0.461435	0.726539	1	-0.132466	0.785987	1	-0.0237913	0.23571	1	-0.198482	0.273885	0.798811	-0.364701	0.634943	1	-0.0960023	0.584386	0.975954	-0.218576	0.191667	0.621141	-0.309593
84114	Agps	alkylglycerone phosphate synthase	0.406651	0.83352	0.241452	0.0259477	0.285274	0.741403	0.61295	0.95486	0.132373	0.451832	0.814236	0.546423	0.504076	0.993796	0.218491	0.5364	1	0.281394	0.526741	0.952018	0.153234	0.0815467	0.752639	1.02177	0.544642	0.953214	0.205173	0.914017	1	-0.00442693
298961	AGR2	anterior gradient 2 homolog (Xenopus laevis)	0.0387527	0.558452	0.299775	0.211384	0.527841	-0.528556	0.948556	1	-0.00158968	0.983761	1	0.00583829	0.0211819	0.721469	0.41359	0.016236	1	-0.530027	0.898937	1	0.0195167	0.249933	0.89433	-0.333054	0.0214898	0.315766	0.417592	0.194733	0.625835	-0.370232
298959	AGR3	anterior gradient 3 homolog (Xenopus laevis)	1	1	0	0.19755	0.516678	0.437937	1	1	0	0.341279	0.733466	0.224428	1	1	0	0.0933172	1	0.302418	1	1	0	0.0575914	0.751369	0.382305	1	1	0	0.278709	0.713424	0.231248
25592	AGRN	agrin	0.414216	0.83352	-0.309868	0.558912	0.839872	-0.130242	0.721395	1	-0.122478	0.98059	1	0.0378566	0.0668393	0.739543	-0.368634	0.464513	1	-0.217413	0.447184	0.918006	-0.176706	0.610797	1	0.105539	0.161186	0.597466	-0.296866	0.193795	0.624588	-0.295633
25582	AGRP	agouti related protein homolog (mouse)	0.740928	1	0.166684	0.70668	0.973292	-0.135374	0.69249	1	-0.0521913	0.75641	1	-0.0153044	0.313022	0.90157	0.4789	0.409511	1	-0.240741	0.753077	1	-0.0559375	0.156954	0.821725	-0.429309	0.33379	0.81305	0.364857	0.432564	0.841961	0.208587
24179	AGT	angiotensinogen (serpin peptidase inhibitor, clade A, member 8)	0.956415	1	0.0120214	0.725791	0.991117	0.0916303	0.413269	0.818347	0.11023	0.281551	0.681276	0.212135	0.468028	0.970026	-0.130363	0.531762	1	-0.180513	0.840401	1	0.0497574	0.93016	1	-0.0082626	0.915898	1	-0.0444472	0.570936	0.923051	0.110433
290986	AGTPBP1	ATP/GTP binding protein 1	0.360902	0.83352	0.118658	0.00563402	0.236323	0.155222	0.716477	1	0.0251466	0.299162	0.693557	0.16904	0.36666	0.938085	0.164453	0.969987	1	0.00830733	0.940178	1	-0.00140443	0.124711	0.772863	0.290142	0.152526	0.586923	0.183263	0.715243	1	-0.0758042
24180	AGTR1	angiotensin II receptor, type 1	0.994219	1	-0.00148924	0.388002	0.708159	-0.351312	0.964621	1	-0.0134515	0.372139	0.762386	-0.206151	0.976402	1	-0.0310665	0.373192	1	-0.237689	0.451347	0.921304	0.0883964	0.880447	1	-0.06306	0.441276	0.894528	-0.104725	0.0455604	0.39307	-0.436199
81638	Agtr1b	angiotensin II receptor, type 1b	1	1	0	1	1	0	1	1	0	1	1	0	1	1	0	1	1	0	1	1	0	1	1	0	1	1	0	1	1	0
24182	AGTR2	angiotensin II receptor, type 2	0.185928	0.700223	0.710777	0.42265	0.708159	-0.260379	0.00923312	0.174517	0.782674	0.90415	1	-0.00732625	0.996934	1	0.119524	0.261514	1	-0.253053	0.216064	0.754473	0.553534	0.818222	1	-0.0469987	0.236253	0.701245	0.457976	0.378617	0.808025	-0.300174
298646	AGTRAP	angiotensin II receptor-associated protein	0.128416	0.656148	-0.440767	0.851292	1	-0.0348042	0.0143964	0.209442	-0.370442	0.358379	0.750055	-0.131394	0.352143	0.928065	-0.181224	0.472501	1	0.124405	0.0286144	0.612323	-0.374299	0.88844	1	-0.040528	0.162016	0.598847	-0.250356	0.940223	1	0.00339406
24792	AGXT	alanine-glyoxylate aminotransferase	0.610423	0.976796	0.189302	0.538929	0.819534	0.263686	0.296978	0.7003	0.271237	0.703741	1	-0.0518269	0.960241	1	0.0706816	0.157702	1	0.382056	0.494716	0.950163	0.211344	0.95398	1	0.0135005	0.703066	1	0.0919313	0.291897	0.724953	0.360262
83784	AGXT2	alanine--glyoxylate aminotransferase 2	0.812697	1	-0.0946465	0.20417	0.52229	-0.566236	0.423689	0.827953	-0.203992	0.080935	0.381279	-0.373409	0.78848	1	0.0791941	0.324793	1	-0.235921	0.65285	1	-0.118723	0.09547	0.752639	-0.418614	0.933067	1	-0.0175234	0.159735	0.581968	-0.350733
100169747	AGXT2L2	alanine-glyoxylate aminotransferase 2-like 2	0.524032	0.914652	0.170379	0.521891	0.803164	0.409927	0.579646	0.929946	0.075411	0.73559	1	0.100147	0.392168	0.957921	0.0656941	0.28196	1	0.293857	0.185287	0.724886	0.183474	0.842592	1	0.0577432	0.849596	1	0.0339392	0.15766	0.577549	0.483518
360886	AHCTF1	AT hook containing transcription factor 1	0.850457	1	0.0346277	0.827039	1	0.0381954	0.405946	0.811225	-0.112466	0.639958	0.964809	-0.0539726	0.2605	0.859257	0.194475	0.525849	1	0.133776	0.826107	1	-0.0497651	0.427433	0.986638	0.192298	0.605043	0.989767	0.111729	0.545209	0.923051	-0.127501
29443	AHCY	adenosylhomocysteinase	0.0281463	0.540742	1.11058	0.0419254	0.313797	1.21279	0.00904713	0.173369	0.792885	0.00700055	0.101079	0.856026	0.0613403	0.73794	0.710924	0.216466	1	0.489822	0.0150246	0.612323	0.808793	0.11625	0.760561	0.638809	0.0144032	0.285416	0.803058	0.00336453	0.181795	1.0226
362013	AHCYL1	adenosylhomocysteinase-like 1	0.627267	0.989931	-0.0706585	0.861251	1	-0.00640485	0.281195	0.682352	-0.118164	0.379039	0.764011	-0.0986681	0.933524	1	-0.0171938	0.405362	1	0.0938846	0.516328	0.952018	-0.0792201	0.373668	0.968698	0.12867	0.691693	1	-0.0365578	0.345091	0.777199	-0.136669
312192	AHCYL2	adenosylhomocysteinase-like 2	0.0831698	0.619589	-0.330094	0.851347	1	-0.0265155	0.00252301	0.10583	-0.331556	0.232422	0.625345	-0.18974	0.462662	0.967226	-0.12625	0.317704	1	0.153532	0.0217893	0.612323	-0.297207	0.649202	1	0.0715086	0.203508	0.659136	-0.185489	0.509535	0.902533	-0.110093
362617	AHDC1	AT hook, DNA binding motif, containing 1	0.236711	0.738612	-0.216393	0.00354126	0.231539	-0.562684	0.0306666	0.286637	-0.204897	0.00272638	0.059844	-0.483403	0.769864	1	-0.0766364	0.556751	1	-0.172557	0.243246	0.772776	-0.154051	0.211246	0.865597	-0.280335	0.193134	0.643125	-0.156186	0.0131132	0.271347	-0.501002
308923	AHI1	Abelson helper integration site 1	0.932715	1	-0.0204176	0.115714	0.42145	-0.319308	0.742012	1	-0.107119	0.191211	0.572994	-0.399076	0.845284	1	0.0224524	0.733912	1	0.0436162	0.84841	1	-0.0704656	0.923659	1	-0.018852	0.961473	1	0.0218259	0.244102	0.685394	-0.418942
191572	AHNAK	AHNAK nucleoprotein	0.760333	1	-0.0582423	0.0803632	0.372206	-0.517237	0.566365	0.920876	0.10644	0.387133	0.764011	-0.186353	0.227064	0.84668	-0.124984	0.0946909	1	-0.367386	0.916812	1	0.0122939	0.426219	0.986499	-0.188515	0.510511	0.951001	-0.0767176	0.0230781	0.318751	-0.513301
25690	AHR	aryl hydrocarbon receptor	0.982155	1	-0.00696542	0.90637	1	-0.0291781	0.932483	1	0.0330537	0.45923	0.819729	-0.218328	0.961269	1	0.0671008	0.504439	1	0.217692	0.798257	1	0.0565921	0.537382	1	0.263588	0.7691	1	-0.0301727	0.485436	0.885277	-0.292978
498999	AHRR	aryl-hydrocarbon receptor repressor	0.830785	1	0.106925	0.00887575	0.245897	-0.169444	0.76893	1	0.0371518	0.0953696	0.414277	-0.209524	0.983017	1	-0.0827143	0.92879	1	0.0070041	0.919477	1	-0.0430014	0.0186621	0.74747	-0.285639	0.660492	1	0.134739	0.746375	1	0.0486884
305577	Ahsa2	AHA1, activator of heat shock protein ATPase 2	0.00646241	0.468318	0.406432	0.179852	0.50555	0.255019	0.122032	0.495502	0.219745	0.159422	0.522978	0.219393	0.0244684	0.721469	0.331532	0.897298	1	0.105329	0.256423	0.784077	0.191353	0.876343	1	-0.0117479	7.72483e-05	0.0822212	0.398838	0.0481864	0.399909	0.375008
25373	AHSG	alpha-2-HS-glycoprotein	0.422648	0.83352	0.274186	0.422649	0.708159	0.177817	0.19768	0.595322	0.274186	0.213666	0.599238	0.177817	0.45421	0.962785	0.137093	0.395777	1	0.0889086	0.135389	0.680364	0.274186	0.106476	0.752639	0.177817	0.536795	0.953214	0.137093	0.536248	0.917174	0.0889086
293522	AHSP	alpha hemoglobin stabilizing protein	0.160466	0.680529	0.31038	0.925655	1	0.0280003	0.198307	0.59541	0.284662	0.197272	0.580631	0.364193	0.53027	1	0.102609	0.247256	1	-0.285785	0.0951818	0.659425	0.34979	0.335687	0.946835	0.294634	0.666051	1	0.0896809	0.405293	0.824077	-0.240497
682999	AIDA	axin interactor, dorsalization associated	0.613258	0.978347	0.0600227	0.807076	1	-0.0176678	0.488346	0.864325	0.0331217	0.671529	0.986639	-0.0428931	0.685567	1	0.0434159	0.915508	1	0.0362427	0.923442	1	0.00716087	0.812697	1	-0.0117145	0.269725	0.741584	0.0783744	0.927589	1	-0.00817009
29427	AIF1	allograft inflammatory factor 1	0.716242	1	0.142242	0.000949329	0.219082	-1.16912	0.369384	0.778058	0.22199	0.0732085	0.365265	-0.673665	0.81899	1	-0.0542917	0.0596178	1	-0.679385	0.550801	0.952084	0.208482	0.0560816	0.751369	-0.740319	0.916072	1	-0.0103401	0.0192705	0.300525	-0.879813
362107	AIF1L	allograft inflammatory factor 1-like	0.29819	0.790374	0.358199	0.672102	0.943136	0.158268	0.312904	0.716519	0.207972	0.298673	0.693557	0.315186	0.276581	0.870167	0.359946	0.759701	1	-0.0463377	0.818084	1	0.100436	0.731567	1	-0.081419	0.0379723	0.37798	0.447068	0.241756	0.682993	0.329303
83533	AIFM1	apoptosis-inducing factor, mitochondrion-associated, 1	0.238041	0.739616	-0.30071	0.190993	0.512868	0.19871	0.0288652	0.278513	-0.313162	0.0703029	0.358783	0.123226	0.578407	1	-0.16652	0.143271	1	0.108331	0.112889	0.673968	-0.268846	0.0994159	0.752639	0.123676	0.220811	0.68307	-0.191758	0.0380972	0.373976	0.152219
361843	AIFM2	apoptosis-inducing factor, mitochondrion-associated, 2	0.594547	0.964574	0.124017	0.0397396	0.310315	0.395256	0.725989	1	0.056538	0.0323736	0.237644	0.35748	0.370697	0.940625	0.162649	0.527617	1	0.080766	0.851428	1	-0.00905408	0.0334821	0.750579	0.376468	0.113778	0.545507	0.206134	0.42291	0.834628	0.16487
303786	AIFM3	apoptosis-inducing factor, mitochondrion-associated, 3	0.15264	0.671879	0.107674	0.512435	0.79421	-0.22555	0.0140115	0.208035	0.161884	0.464658	0.823853	-0.110345	0.832419	1	-0.00356621	0.470028	1	-0.0768192	0.0458899	0.612323	0.147931	0.358449	0.961481	-0.150001	0.910479	1	0.0125151	0.475823	0.879166	-0.137937
292486	AIG1	androgen-induced 1	0.144577	0.667257	0.294406	0.894316	1	0.0290945	0.0344447	0.298858	0.224516	0.499002	0.852357	-0.153813	0.107255	0.765689	0.189589	0.396874	1	0.231691	0.0354758	0.612323	0.224642	0.442807	0.994168	-0.162465	0.0540757	0.424318	0.2078	0.345153	0.777199	0.217519
114632	AIMP1	aminoacyl tRNA synthetase complex-interacting multifunctional protein 1	0.537769	0.925348	0.141308	0.0351916	0.303127	0.421723	0.717709	1	0.0625088	0.026224	0.21358	0.492107	0.300256	0.892838	0.156949	0.795692	1	0.0151434	0.679613	1	0.0746567	0.423563	0.986362	0.273892	0.31395	0.790795	0.139804	0.24237	0.683597	0.316915
288480	AIMP2	aminoacyl tRNA synthetase complex-interacting multifunctional protein 2	0.102226	0.635832	0.453563	0.120756	0.429715	0.477752	0.0178528	0.227977	0.386851	0.0347563	0.247553	0.561484	0.426427	0.962785	0.192779	0.912519	1	-0.0184229	0.118062	0.679577	0.329843	0.6341	1	0.164235	0.0865618	0.496793	0.31693	0.104166	0.494263	0.494537
282827	AIP	aryl hydrocarbon receptor interacting protein	0.776652	1	-0.0215301	0.118954	0.426393	-0.20147	0.36733	0.775267	0.123158	0.750395	1	0.027538	0.265664	0.862761	-0.153105	0.186368	1	-0.268799	0.602318	0.9862	0.0920879	0.422281	0.986362	-0.176051	0.454711	0.906391	-0.123601	0.774918	1	-0.105839
59110	AIPL1	aryl hydrocarbon receptor interacting protein-like 1	1	1	0	1	1	0	1	1	0	1	1	0	1	1	0	1	1	0	1	1	0	1	1	0	1	1	0	1	1	0
294328	AIRE	autoimmune regulator	1	1	0	0.422649	0.708159	0.177817	1	1	0	0.213666	0.599238	0.177817	1	1	0	0.395777	1	0.0889086	1	1	0	0.106476	0.752639	0.177817	1	1	0	0.536248	0.917174	0.0889086
687031	Ajap1	adherens junction associated protein 1	0.191883	0.702769	0.45886	0.896953	1	0.0182698	0.0969782	0.451417	0.41244	0.883567	1	-0.00677949	0.248494	0.857365	0.278197	0.810675	1	-0.00495224	0.0492355	0.612323	0.424423	0.370073	0.968068	0.203399	0.293818	0.770531	0.264649	0.432226	0.841525	-0.18904
85265	AJUBA	ajuba LIM protein	0.0502354	0.581188	0.578927	0.805588	1	-0.0540646	0.10673	0.46974	0.334213	0.206626	0.594097	-0.228062	0.0219253	0.721469	0.432065	0.354718	1	0.145018	0.0547787	0.618368	0.39623	0.282352	0.914327	-0.225037	0.0255486	0.335095	0.438123	0.478617	0.881208	0.143292
24183	Ak1	adenylate kinase 1	0.405103	0.83352	-0.249803	0.964778	1	-0.0180344	0.13252	0.512986	-0.210835	0.819929	1	-0.105066	0.549778	1	-0.116591	0.879529	1	0.0327065	0.309047	0.827007	-0.166225	0.370308	0.968068	-0.243135	0.257399	0.726242	-0.192719	0.419799	0.832515	0.20098
24184	AK2	adenylate kinase 2	0.0167133	0.509491	0.457282	0.154586	0.474453	0.61065	0.154207	0.542478	0.226574	0.0479161	0.295978	0.449733	0.0196654	0.721469	0.36346	0.335164	1	0.250615	0.325342	0.838006	0.209846	0.348821	0.95492	0.251321	0.00071539	0.141294	0.444114	0.0123257	0.266573	0.592779
26956	AK3	adenylate kinase 3	0.0180235	0.509491	-0.307591	0.0492465	0.320232	-0.378574	0.0575083	0.366118	-0.224886	0.0341365	0.245397	-0.409192	0.255131	0.857365	-0.186915	0.854266	1	-0.0369991	0.215004	0.753088	-0.175608	0.0678349	0.752639	-0.397537	0.0482735	0.408237	-0.26925	0.657797	0.980896	-0.129767
29223	AK4	adenylate kinase 4	0.385331	0.83352	0.570337	0.00823914	0.245683	0.668467	0.107669	0.471604	0.641488	0.33373	0.724925	0.609645	0.971986	1	0.290134	0.677422	1	0.190211	0.544052	0.952018	0.362691	0.190176	0.848404	0.760584	0.281224	0.755044	0.518187	0.826251	1	0.174502
314416	AK7	adenylate kinase 7	0.199277	0.708494	-0.201297	0.110491	0.414754	-0.322788	0.595764	0.942136	-0.0884166	0.00884552	0.116865	-0.286807	0.0642496	0.739543	-0.161776	0.34537	1	-0.120874	0.0602998	0.623149	-0.192478	0.0513193	0.751369	-0.245781	0.494904	0.940229	-0.0922172	0.12614	0.529888	-0.2129
311833	AK8	adenylate kinase 8	0.00453967	0.452792	1.51215	0.0578619	0.335966	1.60431	2.36358e-05	0.0253775	1.57926	0.000228555	0.0176122	1.98891	0.672923	1	0.406742	0.767559	1	-0.248634	0.0138603	0.612323	1.43287	0.0504833	0.751369	1.49974	0.225026	0.689345	0.741278	0.387271	0.815135	0.684663
114124	AKAP1	A kinase (PRKA) anchor protein 1	0.269981	0.763954	-0.137153	0.0537212	0.328704	-0.111155	0.767906	1	-0.0420276	0.324151	0.714503	-0.161046	0.0249337	0.721469	-0.160088	0.684294	1	0.0251088	0.482338	0.942862	-0.0698563	0.955499	1	-0.0161499	0.0999831	0.521463	-0.134669	0.490985	0.889333	-0.140317
360540	AKAP10	A kinase (PRKA) anchor protein 10	0.969847	1	0.00511318	0.260495	0.582016	0.213123	0.224093	0.629753	-0.149609	0.771219	1	0.0740828	0.204302	0.824566	0.173692	0.184377	1	0.203115	0.613859	0.993247	-0.0859404	0.217439	0.871904	0.188117	0.577996	0.972453	0.0990812	0.572895	0.923464	0.117405
498549	AKAP11	A kinase (PRKA) anchor protein 11	0.0256727	0.52928	-0.280501	0.916504	1	0.0144247	0.285107	0.68666	-0.161079	0.694998	1	-0.0718641	0.0995778	0.758037	-0.209534	0.657017	1	0.0901749	0.384169	0.876397	-0.141421	0.345205	0.952193	0.284636	0.0360137	0.372546	-0.262617	0.377156	0.806703	-0.264107
83425	AKAP12	A kinase (PRKA) anchor protein 12	0.123187	0.655701	0.860144	0.0314029	0.295495	-0.402163	0.0116249	0.190175	0.764498	0.167949	0.536617	-0.301094	0.260271	0.859257	0.486839	0.816096	1	-0.147958	0.0544155	0.618368	0.662411	0.849225	1	0.0235581	0.0899013	0.504232	0.614845	0.027672	0.338947	-0.575405
293024	AKAP13	A kinase (PRKA) anchor protein 13	0.91992	1	0.0127858	0.797256	1	-0.0288153	0.603219	0.947852	-0.0841949	0.473115	0.832608	-0.215317	0.515723	1	0.0926451	0.533592	1	0.16499	0.690553	1	-0.0664353	0.548165	1	0.190403	0.590822	0.979431	0.0820378	0.479913	0.881719	-0.235994
60332	AKAP14	A kinase (PRKA) anchor protein 14	0.962044	1	-0.0242982	0.219014	0.535662	0.166028	0.655338	0.988434	0.0850318	0.46369	0.823098	0.227434	0.583181	1	-0.169051	0.760679	1	-0.0384142	0.982837	1	0.0303795	0.956223	1	0.0618178	0.896535	1	-0.0826842	0.676538	0.994651	0.167216
288526	Akap17a	A kinase (PRKA) anchor protein 17A	0.345427	0.83207	0.175971	0.508626	0.790727	-0.0825487	0.108056	0.471723	0.279323	0.399987	0.767957	0.151646	0.720864	1	-0.0865212	0.206401	1	-0.23493	0.269969	0.794896	0.240219	0.534567	1	-0.118176	0.874234	1	1.91988e-05	0.857539	1	0.00786674
298024	PALM2-AKAP2	PALM2-AKAP2 readthrough	0.881891	1	-0.0298585	0.401235	0.708159	0.149711	0.30683	0.710106	0.111807	0.74329	1	0.200955	0.188267	0.817027	-0.204974	0.932196	1	-0.0132429	0.907118	1	0.0121151	0.231316	0.884616	0.495981	0.710315	1	-0.0730291	0.479941	0.881719	-0.283699
312720	AKAP3	A kinase (PRKA) anchor protein 3	0.422885	0.833595	0.195492	0.0743333	0.361435	0.666675	0.181988	0.579518	0.399383	0.000413502	0.0230129	0.681355	0.614417	1	-0.168528	0.735277	1	0.166386	0.218826	0.756182	0.409238	0.0829032	0.752639	0.4833	0.744099	1	-0.136794	0.0767746	0.460702	0.465956
79254	AKAP4	A kinase (PRKA) anchor protein 4	1	1	0	1	1	0	1	1	0	1	1	0	1	1	0	1	1	0	1	1	0	1	1	0	1	1	0	1	1	0
171026	AKAP5	A kinase (PRKA) anchor protein 5	0.806801	1	0.0376495	0.308912	0.63581	0.342972	0.687017	1	0.0177101	0.45674	0.817942	0.198629	0.97745	1	-0.0166324	0.424858	1	0.155707	0.424556	0.902855	0.0876288	0.687903	1	0.102266	0.742891	1	-0.0496201	0.166393	0.591456	0.358818
64553	AKAP6	A kinase (PRKA) anchor protein 6	0.402127	0.83352	0.219973	0.760131	1	0.108141	0.866632	1	0.0542895	0.493798	0.848355	-0.0899922	0.336861	0.916331	0.24698	0.271717	1	0.315234	0.461525	0.928832	0.166312	0.561327	1	0.196575	0.64961	1	0.154084	0.887642	1	-0.0133525
361458	AKAP7	A kinase (PRKA) anchor protein 7	0.126008	0.656148	-0.568068	0.176586	0.501489	0.514006	0.265571	0.66229	-0.280817	0.206323	0.59377	0.471105	0.0257509	0.721469	-0.490774	0.715832	1	0.0590865	0.15914	0.699741	-0.352011	0.12242	0.769181	0.539142	0.0314207	0.357855	-0.473254	0.759121	1	0.151595
116633	AKAP8	A kinase (PRKA) anchor protein 8	0.920935	1	-0.00812059	0.00405376	0.233483	-0.0429822	0.34878	0.756149	-0.0873701	0.805623	1	0.0236366	0.419312	0.962785	0.0528569	0.241405	1	-0.0740368	0.267107	0.792203	-0.101484	0.445399	0.996869	0.0459387	0.338783	0.816652	0.081859	0.0596954	0.434809	-0.105721
299569	AKAP8L	A kinase (PRKA) anchor protein 8-like	0.410588	0.83352	-0.138152	0.0307115	0.295336	-0.597198	0.537063	0.899153	-0.0820837	0.0455073	0.286927	-0.383482	0.266159	0.862984	-0.135715	0.15208	1	-0.286792	0.237011	0.769413	-0.127522	0.0149233	0.74747	-0.467542	0.509931	0.950617	-0.0832302	0.125886	0.529081	-0.35308
246150	AKAP9	A kinase (PRKA) anchor protein (yotiao) 9	0.454314	0.858328	-0.221183	0.830747	1	-0.0207721	0.195598	0.595322	-0.249742	0.564146	0.907036	-0.131359	0.83189	1	-0.0307311	0.615537	1	0.133165	0.245505	0.772776	-0.239818	0.516229	1	0.193628	0.655068	1	-0.0748561	0.46323	0.870344	-0.213798
361624	AKIP1	A kinase (PRKA) interacting protein 1	0.60626	0.972779	-0.223297	0.750192	1	-0.06005	0.988058	1	-0.000341018	0.98198	1	-0.0091199	0.24399	0.857365	-0.284509	0.761569	1	-0.0166955	0.764923	1	-0.0554826	0.418021	0.984511	-0.183465	0.350923	0.82842	-0.262764	0.622827	0.957227	0.11481
595134	AKIRIN1	akirin 1	0.165444	0.686386	0.0572281	0.194551	0.514414	0.452159	0.85834	1	0.0193363	0.62051	0.95023	0.127949	0.207162	0.827134	0.0531607	0.0596813	1	0.361643	0.123878	0.680364	0.0740302	0.593573	1	0.118507	0.959318	1	0.0073636	0.0161283	0.289575	0.496849
297968	AKIRIN2	akirin 2	0.0597834	0.598152	0.246829	0.027057	0.287162	0.403274	0.294666	0.69784	0.128279	0.00656542	0.0988586	0.386968	0.0487043	0.721469	0.219381	0.949909	1	0.0844225	0.416983	0.898426	0.108166	0.192246	0.850378	0.276374	0.00823136	0.25268	0.25455	0.145848	0.56077	0.28403
362530	AKNA	AT-hook transcription factor	0.139905	0.66521	-0.708857	0.127323	0.438001	0.660188	0.128304	0.50776	-0.364629	0.323904	0.714427	0.451098	0.0791549	0.7404	-0.481434	0.283475	1	0.329155	0.257121	0.784077	-0.341438	0.174057	0.836735	0.537324	0.0074125	0.245291	-0.64944	0.345131	0.777199	0.382949
691416	AKNAD1	AKNA domain containing 1	0.0565716	0.593786	0.40205	0.0194025	0.268549	2.41084	0.00268435	0.108633	0.51654	6.90253e-06	0.00435371	2.38199	0.966256	1	0.0521909	0.639482	1	0.544001	0.0193184	0.612323	0.468901	0.0430335	0.750579	1.73033	0.590753	0.979412	0.122726	0.0484517	0.401482	1.65584
64621	ALPI	alkaline phosphatase, intestinal	0.422647	0.83352	-0.179639	0.422647	0.708159	-0.171541	0.45421	0.834589	-0.0898194	0.985484	1	-0.0252388	0.25281	0.857365	-0.0898194	0.309905	1	-0.232073	0.550415	0.952018	-0.0598796	0.265191	0.901641	-0.23739	0.129883	0.564287	-0.179639	0.996549	1	-0.0199211
78959	AKR1A1	aldo-keto reductase family 1, member A1 (aldehyde reductase)	0.542216	0.928683	0.126205	0.242941	0.562114	0.225279	0.375258	0.784772	0.139028	0.0974961	0.4177	0.350546	0.937234	1	0.00679868	0.546761	1	-0.117212	0.533928	0.952018	0.126478	0.860926	1	0.0732067	0.682883	1	0.048336	0.36136	0.793445	0.22985
24192	AKR1B1	aldo-keto reductase family 1, member B1 (aldose reductase)	0.730317	1	-0.0862755	0.173677	0.497906	0.438205	0.663791	0.996067	-0.0769979	0.490149	0.845845	0.183763	0.772801	1	-0.0791395	0.311173	1	0.295503	0.600815	0.98497	-0.0810099	0.946166	1	-0.0285458	0.809807	1	-0.0573114	0.0305271	0.350085	0.626506
296972	Akr1b10	aldo-keto reductase family 1, member B10 (aldose reductase)	0.0214379	0.514432	-0.389219	0.244887	0.564857	0.443091	0.109319	0.473804	-0.247761	0.690555	1	0.116579	0.0717917	0.739543	-0.280386	0.169109	1	0.348322	0.129662	0.680364	-0.243287	0.485841	1	0.203942	0.025288	0.334244	-0.32198	0.197193	0.628193	0.394117
116463	Akr1b7	aldo-keto reductase family 1, member B7	0.726237	1	-0.144964	0.877283	1	0.0735721	0.866257	1	0.05045	0.967463	1	-0.0915432	0.405489	0.96243	-0.363772	0.735507	1	0.0180696	0.57187	0.965157	0.146326	0.522464	1	0.148947	0.204355	0.660863	-0.39573	0.761665	1	-0.0998665
286921	AKR1B10	aldo-keto reductase family 1, member B10 (aldose reductase)	0.496071	0.89209	0.294449	0.0762072	0.364963	1.14422	0.210401	0.612593	0.318995	0.135561	0.482567	0.883577	0.769037	1	0.014318	0.417621	1	0.541943	0.153561	0.69536	0.35808	0.789999	1	0.173121	0.82867	1	0.0474733	0.00489947	0.198859	1.44627
307092	AKR1C4	aldo-keto reductase family 1, member C4	1	1	0	1	1	0	1	1	0	1	1	0	1	1	0	1	1	0	1	1	0	1	1	0	1	1	0	1	1	0
361266	Akr1c12/Akr1c12l1	aldo-keto reductase family 1, member C12	0.19153	0.702352	0.150548	0.583761	0.862598	-0.167769	0.196654	0.595322	0.126632	0.829867	1	-0.0404586	0.153624	0.794983	0.0980199	0.459523	1	-0.0819096	0.0763725	0.642746	0.132354	0.572293	1	-0.114348	0.268304	0.740487	0.0930785	0.620315	0.955324	-0.094211
498790	Akr1c12/Akr1c12l1	aldo-keto reductase family 1, member C12	0.422647	0.83352	-0.161532	0.191818	0.513184	-0.400716	0.45421	0.834589	-0.0807662	0.201813	0.588004	-0.200358	0.19768	0.817027	-0.161532	0.118526	1	-0.286128	0.536795	0.952018	-0.0807662	0.401857	0.980839	-0.162162	0.135389	0.564287	-0.161532	0.00865813	0.233673	-0.400716
364773	Akr1c12/Akr1c13	aldo-keto reductase family 1, member C13	0.0376787	0.556038	-0.330802	0.0609583	0.342082	-0.424165	0.0848568	0.429567	-0.236922	0.0294972	0.227199	-0.328909	0.132775	0.784236	-0.223397	0.298528	1	-0.170758	0.102273	0.665241	-0.22175	0.0921317	0.752639	-0.28283	0.0633687	0.448512	-0.262492	0.0598185	0.434809	-0.30789
191574	Akr1c14	aldo-keto reductase family 1, member C14	0.110679	0.644353	-0.463604	0.0755454	0.36384	-0.759335	0.414092	0.818632	-0.187124	0.672579	0.987706	-0.172696	0.045727	0.721469	-0.385573	0.0176603	1	-0.639387	0.408342	0.891848	-0.199455	0.55426	1	-0.19293	0.0224129	0.319211	-0.455047	0.00289844	0.173804	-0.8371
307096	Akr1c19	aldo-keto reductase family 1, member C19	0.0278534	0.540742	-1.13411	0.00537401	0.235112	-1.5528	0.00805347	0.166243	-0.798168	0.0013874	0.040898	-1.16897	0.0823739	0.745898	-0.722892	0.226452	1	-0.667206	0.0495157	0.612323	-0.737142	0.0880102	0.752639	-0.875113	0.00437173	0.21395	-0.90399	0.00129416	0.135212	-1.28974
291283	AKR1C1/AKR1C2	aldo-keto reductase family 1, member C2	1	1	0	0.42265	0.708159	0.00627624	0.45421	0.834589	-0.125327	0.547833	0.893383	0.0920468	0.45421	0.962785	0.125327	0.598161	1	-0.0826324	0.536795	0.952018	-0.125327	0.418817	0.984511	0.0920468	0.536795	0.953214	0.125327	0.466308	0.871609	-0.0826324
171516	AKR1C3	aldo-keto reductase family 1, member C3	1	1	0	1	1	0	1	1	0	1	1	0	1	1	0	1	1	0	1	1	0	1	1	0	1	1	0	1	1	0
361267	Akr1cl	aldo-keto reductase family 1, member C-like	0.17873	0.69949	-0.478262	0.670759	0.942182	-0.0874206	0.143295	0.527867	-0.386435	0.693093	1	0.0463635	0.329373	0.910291	-0.280781	0.359387	1	-0.094515	0.135553	0.680407	-0.426748	0.635518	1	-0.0901777	0.260716	0.729758	-0.27392	0.926839	1	-0.0132934
192242	AKR1D1	aldo-keto reductase family 1, member D1	0.811042	1	-0.0935432	1	1	0	0.718284	1	-0.131068	0.606221	0.939939	-0.123285	0.883685	1	-0.105122	0.606221	1	0.123285	0.991049	1	-0.00709367	0.241844	0.889547	-0.25507	0.593931	0.981338	-0.16518	0.241844	0.682993	0.25507
307091	AKR1E2	aldo-keto reductase family 1, member E2	0.0419446	0.564993	-0.517044	0.00717264	0.245683	-0.3564	0.0436951	0.332744	-0.385172	0.0370399	0.255615	-0.275377	0.140834	0.78667	-0.317801	0.327886	1	-0.14365	0.0615794	0.623149	-0.374428	0.00618235	0.74747	-0.347184	0.087943	0.500974	-0.37694	0.37689	0.806236	-0.148891
171445	AKR7A2	aldo-keto reductase family 7, member A2 (aflatoxin aldehyde reductase)	0.392628	0.83352	0.140404	0.394165	0.708159	0.219607	0.240059	0.647827	0.240296	0.574593	0.914913	0.11109	0.824541	1	-0.0436837	0.848954	1	0.0920953	0.397884	0.887015	0.193325	0.583103	1	-0.16932	0.869265	1	0.012616	0.147424	0.562751	0.456655
26760	AKR7A3	aldo-keto reductase family 7, member A3 (aflatoxin aldehyde reductase)	0.42265	0.83352	0.0898006	0.0121029	0.248824	0.620217	0.163118	0.552435	0.166324	0.429149	0.796209	0.289646	0.503503	0.993499	-0.0765232	0.055043	1	0.456882	0.469247	0.933016	0.128611	0.169067	0.831201	0.398363	0.998475	1	-0.00887659	0.0986011	0.494263	0.470696
24185	AKT1	v-akt murine thymoma viral oncogene homolog 1	0.571972	0.949106	-0.116876	0.133763	0.445701	-0.163255	0.308671	0.712029	-0.100818	0.0140309	0.15035	-0.36835	0.775131	1	-0.0708313	0.230117	1	0.156966	0.519258	0.952018	-0.0837798	0.331277	0.94586	-0.222742	0.463763	0.915166	-0.0903124	0.903255	1	-0.0109734
292887	AKT1S1	AKT1 substrate 1 (proline-rich)	0.0499921	0.580922	-0.217855	0.594844	0.873063	-0.065979	0.878449	1	-0.00977141	0.428248	0.795236	0.168565	0.299226	0.890724	-0.276153	0.259156	1	-0.229059	0.934086	1	0.00274161	0.592387	1	-0.116225	0.206544	0.663295	-0.315905	0.857525	1	0.0300819
25233	AKT2	v-akt murine thymoma viral oncogene homolog 2	0.303264	0.793157	0.0649898	0.105269	0.407176	0.301873	0.390496	0.798037	0.0601275	0.709996	1	0.121968	0.712728	1	0.0187765	0.136962	1	0.226843	0.428094	0.905565	0.0566208	0.253803	0.895053	0.225188	0.622179	1	0.0346703	0.361681	0.793843	0.192955
29414	AKT3	v-akt murine thymoma viral oncogene homolog 3 (protein kinase B, gamma)	0.64137	1	-0.115792	0.101457	0.403011	-0.488179	0.410943	0.816291	-0.139979	0.021253	0.190796	-0.676123	0.929461	1	-0.00698537	0.61268	1	0.140578	0.565443	0.961027	-0.113971	0.550709	1	-0.260742	0.695235	1	-0.0508085	0.250084	0.691273	-0.405952
291906	AKTIP	AKT interacting protein	0.294485	0.787707	0.116753	0.0193949	0.268549	0.402136	0.0514054	0.351721	0.136186	0.21974	0.607594	0.189953	0.850171	1	0.0317715	0.0318026	1	0.296767	0.0558365	0.618368	0.139219	0.432655	0.989018	0.125471	0.619247	1	0.0335204	5.60572e-05	0.0561561	0.438905
25374	ALAD	aminolevulinate dehydratase	0.355225	0.83352	-0.202969	0.208466	0.525768	0.13778	0.670572	1	-0.0865141	0.206701	0.594213	0.308176	0.197401	0.817027	-0.22883	0.503741	1	-0.142846	0.324293	0.83792	-0.153503	0.642293	1	-0.11368	0.4087	0.868827	-0.154581	0.26503	0.70337	0.306571
65155	Alas1	aminolevulinate, delta-, synthase 1	0.206109	0.711966	0.164351	0.0208703	0.274464	0.24754	0.211492	0.613684	0.0873033	0.0349479	0.247723	0.25552	0.0364765	0.721469	0.125852	0.839375	1	0.0222463	0.146363	0.689584	0.101818	0.726821	1	0.0481843	0.0349927	0.371233	0.133585	0.0336329	0.361494	0.291945
25748	ALAS2	aminolevulinate, delta-, synthase 2	0.344948	0.831884	-0.138215	1	1	0	0.766954	1	0.0433842	0.304546	0.693557	0.102558	0.210732	0.832466	-0.259119	0.304546	1	-0.102558	0.824454	1	0.0459324	0.572368	1	-0.0683723	0.213615	0.672237	-0.256059	0.572368	0.923051	0.0683723
24186	ALB	albumin	0.583981	0.957699	-0.28308	0.519637	0.80136	-0.118582	0.949379	1	-0.0120395	0.149653	0.507842	0.334256	0.273043	0.868069	-0.43095	0.0433237	1	-0.521143	0.969974	1	0.0021903	0.910655	1	0.0488317	0.194973	0.646115	-0.432933	0.525662	0.916429	-0.22971
79559	ALCAM	activated leukocyte cell adhesion molecule	0.714187	1	0.0418214	0.363127	0.693123	0.180306	0.610208	0.952866	0.0615109	0.714288	1	0.143335	0.895678	1	-0.0232535	0.761039	1	0.0933347	0.492467	0.949228	0.0861098	0.196901	0.854761	0.394314	0.761166	1	-0.031536	0.618391	0.954692	-0.135118
361571	ALDH16A1	aldehyde dehydrogenase 16 family, member A1	0.416356	0.83352	0.127439	0.604062	0.881203	-0.0901915	0.378263	0.786802	0.149957	0.821429	1	0.0529844	0.833401	1	-0.0105101	0.346069	1	-0.142318	0.550284	0.952018	0.093264	0.440105	0.992846	-0.115962	0.574757	0.971048	0.0806573	0.984927	1	-0.00400698
361755	ALDH18A1	aldehyde dehydrogenase 18 family, member A1	0.684129	1	-0.0532772	0.424706	0.710376	2.46229	0.591903	0.939345	-0.0348114	0.450048	0.812242	1.07411	0.638609	1	-0.0674043	0.27356	1	1.3312	0.895828	1	-0.0185522	0.613803	1	0.733557	0.356119	0.832984	-0.0687969	0.105441	0.494263	2.5305
24188	ALDH1A1	aldehyde dehydrogenase 1 family, member A1	0.431331	0.842483	-0.411977	0.283298	0.607219	-0.659421	0.190866	0.59294	-0.39979	0.0234088	0.200473	-1.11668	0.411968	0.962785	-0.241985	0.45949	1	0.389749	0.268126	0.793245	-0.308038	0.119616	0.76771	-0.951256	0.284913	0.759255	-0.317864	0.963966	1	0.0495256
116676	ALDH1A2	aldehyde dehydrogenase 1 family, member A2	0.405127	0.83352	0.185086	0.74066	1	-0.106122	0.0434907	0.331937	0.231633	0.656621	0.976906	-0.148444	0.853117	1	-0.0425934	0.770694	1	-0.0906075	0.210754	0.750989	0.188112	0.822085	1	-0.0426131	0.617839	0.999118	0.0599883	0.563207	0.923051	-0.143193
266603	ALDH1A3	aldehyde dehydrogenase 1 family, member A3	0.0588389	0.597829	-0.894583	0.22937	0.547619	-0.5535	0.0955672	0.448523	-0.557379	0.189212	0.570375	-0.519716	0.0184891	0.721469	-0.703688	0.681703	1	-0.119554	0.086446	0.651781	-0.576882	0.624128	1	-0.184334	0.00864946	0.258019	-0.738056	0.161359	0.584049	-0.582256
29651	Aldh1a7	aldehyde dehydrogenase family 1, subfamily A7	0.857989	1	-0.059268	0.222606	0.539513	0.280122	0.487714	0.863745	-0.118362	0.225337	0.614488	0.376966	0.778702	1	0.0294603	0.987661	1	-0.0493035	0.605657	0.988823	-0.118362	0.767847	1	0.0798056	0.945265	1	0.0294603	0.334765	0.768127	0.309537
298079	ALDH1B1	aldehyde dehydrogenase 1 family, member B1	0.975843	1	0.00810508	0.0599931	0.34008	-0.385054	0.21352	0.61732	0.269371	0.00405235	0.0742059	-0.278799	0.232912	0.852658	-0.226704	0.320141	1	-0.137536	0.387334	0.878497	0.225213	0.0523176	0.751369	-0.254707	0.417698	0.877451	-0.202885	0.0410996	0.383312	-0.269125
64392	Aldh1l1	aldehyde dehydrogenase 1 family, member L1	0.422648	0.83352	0.418303	0.00540098	0.235112	-0.644399	0.303355	0.707353	0.157163	0.0696407	0.356916	-0.438694	0.300778	0.892909	0.26114	0.412813	1	-0.321745	0.485625	0.94481	0.19204	0.597124	1	-0.215939	0.138413	0.57029	0.365697	0.00651245	0.214577	-0.68194
299699	ALDH1L2	aldehyde dehydrogenase 1 family, member L2	0.115278	0.648408	-0.474628	0.512066	0.793927	-0.182977	0.266494	0.663638	-0.243399	0.0456814	0.287598	-0.575478	0.0317234	0.721469	-0.437998	0.267264	1	0.294551	0.352314	0.860202	-0.21176	0.58263	1	-0.185214	0.0047291	0.221254	-0.49	0.83765	1	-0.0914052
29539	ALDH2	aldehyde dehydrogenase 2 family (mitochondrial)	0.850451	1	0.0545022	0.0777393	0.367852	-0.51402	0.413567	0.818347	0.148042	0.24144	0.637575	-0.316705	0.702679	1	-0.0414711	0.254124	1	-0.327211	0.555893	0.954877	0.116566	0.0298525	0.748984	-0.540124	0.898671	1	-0.0265397	0.569643	0.923051	-0.188534
25375	ALDH3A1	aldehyde dehydrogenase 3 family, member A1	0.707542	1	0.221526	0.422649	0.708159	0.316723	0.688598	1	0.0305996	0.620498	0.95023	0.0811968	0.634353	1	0.0738983	0.402698	1	0.235526	0.724403	1	0.123214	0.664424	1	0.14882	0.577332	0.972453	0.133145	0.286182	0.719903	0.273477
65183	ALDH3A2	aldehyde dehydrogenase 3 family, member A2	0.38525	0.83352	0.135492	0.176677	0.501637	-0.130459	0.424642	0.829033	0.0779122	0.0440256	0.282077	-0.201551	0.224418	0.844538	0.131132	0.727215	1	0.0465578	0.360949	0.864035	0.08809	0.629541	1	-0.0597116	0.225649	0.690215	0.117083	0.293524	0.726875	-0.122412
309147	ALDH3B1	aldehyde dehydrogenase 3 family, member B1	0.999296	1	0.000769358	0.0942277	0.392539	-0.755366	0.958465	1	-0.0923776	0.217754	0.60436	-0.385273	0.956839	1	0.0918343	0.0822559	1	-0.434669	0.839204	1	-0.0799921	0.0278649	0.74747	-0.615827	0.837495	1	0.0805804	0.221727	0.660395	-0.412853
641316	ALDH4A1	aldehyde dehydrogenase 4 family, member A1	0.0200856	0.512449	-0.548077	0.101113	0.402795	-0.692257	0.163923	0.55312	-0.269952	0.0994391	0.422096	-0.406656	0.0153835	0.721469	-0.459167	0.0460268	1	-0.476013	0.149994	0.693481	-0.313876	0.0923782	0.752639	-0.40967	0.00883337	0.259366	-0.477241	0.0105856	0.250608	-0.57681
81708	ALDH6A1	aldehyde dehydrogenase 6 family, member A1	0.153207	0.673183	-0.302643	0.0112859	0.248824	-0.601592	0.0537071	0.356304	-0.210766	0.323872	0.714427	-0.282291	0.14539	0.790296	-0.16281	0.077178	1	-0.425917	0.146509	0.689584	-0.177786	0.64141	1	-0.139052	0.0322244	0.359824	-0.249382	0.00197797	0.162729	-0.698609
291450	ALDH7A1	aldehyde dehydrogenase 7 family, member A1	0.655846	1	0.059167	0.650443	0.924521	0.0996725	0.362984	0.769704	0.0823206	0.114473	0.447054	0.1622	0.84282	1	-0.0399422	0.459656	1	-0.096485	0.6611	1	0.055635	0.969404	1	0.00966207	0.759676	1	0.0176582	0.41777	0.830731	0.111915
685750	ALDH8A1	aldehyde dehydrogenase 8 family, member A1	0.691265	1	-0.210816	0.562311	0.843492	0.070089	0.493786	0.868267	-0.203802	0.70972	1	-0.0818533	0.929143	1	0.101723	0.452704	1	0.183584	0.227865	0.763908	-0.399433	0.270127	0.904139	-0.243593	0.729127	1	0.15459	0.115456	0.511128	0.347592
64040	ALDH9A1	aldehyde dehydrogenase 9 family, member A1	0.0833557	0.619807	-0.163941	0.700412	0.967947	0.142356	0.135512	0.51715	-0.112534	0.598861	0.933768	0.0537202	0.099555	0.758037	-0.122456	0.760853	1	0.0548324	0.0559116	0.618368	-0.130133	0.93715	1	-0.0121577	0.13887	0.570752	-0.112138	0.304485	0.737293	0.190698
24189	ALDOA	aldolase A, fructose-bisphosphate	0.174932	0.698023	0.420202	0.102636	0.40464	0.683787	0.0631148	0.381016	0.347665	0.0156482	0.160198	0.7157	0.321512	0.905934	0.222452	0.995563	1	0.0464404	0.213802	0.752748	0.27542	0.556646	1	0.257721	0.0732974	0.467492	0.33482	0.0548521	0.420237	0.680113
299052	Aldoart1	aldolase 1 A retrogene 1	0.816187	1	0.110059	1	1	0	0.310185	0.71317	0.313397	1	1	0	0.624656	1	-0.148309	1	1	0	0.557845	0.956032	0.169547	1	1	0	0.965602	1	-0.00445836	1	1	0
24190	ALDOB	aldolase B, fructose-bisphosphate	0.218942	0.724276	0.502725	0.0815299	0.374549	1.41914	0.43019	0.834222	-0.747754	0.535313	0.884141	-0.639857	0.101658	0.758037	1.33787	0.00696034	1	2.10492	0.470002	0.933049	-0.630803	0.912881	1	0.0897725	0.10474	0.526929	1.33023	0.0592485	0.433792	1.81772
24191	ALDOC	aldolase C, fructose-bisphosphate	0.553835	0.935603	-0.160033	0.0466137	0.316324	-0.724067	0.300955	0.704894	-0.153238	0.0233054	0.20032	-0.510114	0.959674	1	0.0150328	0.273385	1	-0.293582	0.196416	0.738729	-0.230972	0.0568881	0.751369	-0.508881	0.913721	1	0.0248702	0.104776	0.494263	-0.483085
360475	ALG1	ALG1, chitobiosyldiphosphodolichol beta-mannosyltransferase	0.101966	0.635832	-0.207591	0.0654932	0.347786	0.0718206	0.718049	1	-0.0342154	0.145582	0.50068	0.141712	0.0249137	0.721469	-0.261563	0.606313	1	-0.0517235	0.957912	1	-0.0248447	0.967669	1	-0.0095979	0.00764812	0.247784	-0.281339	0.339809	0.773035	0.111415
245960	ALG10	ALG10, alpha-1,2-glucosyltransferase	0.235372	0.738612	0.345104	0.0586906	0.338249	0.36665	0.355882	0.762444	0.215818	0.668724	0.98525	0.358984	0.230837	0.850069	0.301501	0.875441	1	0.0695432	0.237156	0.769413	0.253492	0.224444	0.875311	0.847373	0.281906	0.75587	0.264052	0.598392	0.942104	-0.337881
361174	ALG11	ALG11, alpha-1,2-mannosyltransferase	0.99788	1	0.000135969	0.0382697	0.307276	0.314279	0.240178	0.647906	-0.118876	0.0100033	0.124733	0.258621	0.23943	0.857365	0.129095	0.545638	1	0.0943471	0.462934	0.930083	-0.0716267	0.0404935	0.750579	0.256928	0.461795	0.913621	0.0751692	0.186284	0.615131	0.175007
315212	ALG12	ALG12, alpha-1,6-mannosyltransferase	0.179382	0.69949	0.184014	0.00777412	0.245683	0.452708	0.0476482	0.343293	0.171555	0.000347448	0.0211497	0.610258	0.499013	0.990292	0.0803766	0.724966	1	-0.0860396	0.296232	0.815163	0.110318	0.206159	0.860511	0.315721	0.10731	0.533248	0.157673	0.23271	0.672387	0.311726
300284	Alg13	asparagine-linked glycosylation 13	0.877845	1	0.0233166	0.558476	0.83952	0.166677	0.717069	1	-0.0286528	0.452	0.814236	0.0921963	0.460855	0.967065	0.0584307	0.62053	1	0.131718	0.924185	1	0.00890617	0.618759	1	0.0971175	0.780262	1	0.0243364	0.381349	0.810177	0.144198
362031	ALG14	ALG14, UDP-N-acetylglucosaminyltransferase subunit	0.0394426	0.558452	-0.150632	0.60877	0.885858	0.103256	0.167005	0.556709	-0.0976893	0.311119	0.701657	0.146693	0.247399	0.857365	-0.10803	0.805555	1	0.0164271	0.404128	0.889745	-0.0687647	0.988545	1	0.0151055	0.0439265	0.396013	-0.150441	0.390335	0.818444	0.142524
313231	ALG2	ALG2, alpha-1,3/1,6-mannosyltransferase	0.149387	0.671161	0.133144	0.208825	0.526033	0.149633	0.337633	0.745273	0.0525414	0.0369784	0.25537	0.0990284	0.114472	0.769928	0.116098	0.451617	1	0.056898	0.67583	1	0.0349541	0.134363	0.786321	0.0978042	0.00948276	0.264366	0.154403	0.102561	0.494263	0.103804
287983	ALG3	ALG3, alpha-1,3- mannosyltransferase	0.756852	1	0.0567056	0.283719	0.607451	0.194114	0.532152	0.895859	0.0953563	0.254674	0.650498	0.159802	0.867699	1	-0.0366287	0.98382	1	0.027366	0.613722	0.993247	0.0970365	0.757723	1	-0.0448722	0.991563	1	-0.020755	0.0898566	0.481383	0.301376
295051	ALG5	ALG5, dolichyl-phosphate beta-glucosyltransferase	0.813334	1	0.0409003	0.0527458	0.327254	0.291828	0.864333	1	0.0519722	0.0688779	0.354849	0.286898	0.822143	1	0.041562	0.915079	1	0.0483588	0.352065	0.860159	0.139971	0.781535	1	0.083465	0.632866	1	-0.0678927	0.110835	0.502135	0.320115
362547	ALG6	ALG6, alpha-1,3-glucosyltransferase	0.110809	0.644353	-0.328221	0.25907	0.580215	-0.25865	0.0570636	0.365321	-0.255535	0.610014	0.941929	-0.0730294	0.271779	0.866904	-0.14788	0.117537	1	-0.210308	0.186995	0.726954	-0.192866	0.741588	1	-0.0587342	0.0776351	0.478858	-0.269827	0.0348009	0.363473	-0.294361
293129	ALG8	ALG8, alpha-1,3-glucosyltransferase	0.100982	0.635832	-0.282688	0.577712	0.857543	-0.0462839	0.628289	0.96766	-0.096292	0.1184	0.453724	0.133939	0.0490832	0.721469	-0.308906	0.033296	1	-0.210465	0.71609	1	-0.0548878	0.969824	1	0.00457444	0.00507817	0.228759	-0.362866	0.650924	0.975183	-0.0763668
367083	ALG9	ALG9, alpha-1,2-mannosyltransferase	0.0188984	0.509491	0.151002	0.0538772	0.32882	0.450334	0.295698	0.699132	0.0651834	0.0238311	0.202618	0.304878	0.0151345	0.721469	0.141673	0.252543	1	0.179557	0.428957	0.906228	0.0572887	0.255494	0.89621	0.187825	0.000231786	0.104023	0.162666	0.00350096	0.184435	0.423988
266802	ALK	anaplastic lymphoma receptor tyrosine kinase	0.556168	0.937155	-0.141167	0.351662	0.682691	-0.213422	0.211184	0.613268	-0.186037	0.0550261	0.316907	-0.479434	0.972329	1	-0.0254322	0.391375	1	0.235122	0.156035	0.697446	-0.232922	0.200379	0.856969	-0.342437	0.920175	1	0.021265	0.805033	1	0.0475783
362766	ALKBH1	alkB, alkylation repair homolog 1 (E. coli)	0.833735	1	0.0156317	0.0145771	0.252542	0.269126	0.714365	1	-0.0397493	0.105498	0.433552	0.258467	0.551132	1	0.0524149	0.696056	1	0.0648869	0.991541	1	-0.0124517	0.0561064	0.751369	0.309566	0.799371	1	0.0323053	0.807873	1	0.067345
304578	ALKBH2	alkB, alkylation repair homolog 2 (E. coli)	0.399818	0.83352	0.219079	0.321743	0.651831	0.145577	0.827155	1	0.0607139	0.236819	0.631641	0.270601	0.0436675	0.721469	0.277381	0.65042	1	-0.064334	0.571471	0.964726	0.0987025	0.860453	1	-0.0147103	0.113628	0.545507	0.233075	0.331461	0.764979	0.229043
362169	ALKBH3	alkB, alkylation repair homolog 3 (E. coli)	0.00787921	0.471776	0.309388	0.145606	0.460819	0.252518	0.0202463	0.240874	0.237834	0.145337	0.500522	0.274989	0.204759	0.824566	0.170177	0.985658	1	0.0322938	0.158985	0.699614	0.187201	0.966022	1	0.00462603	0.0121084	0.273534	0.258191	0.0930806	0.488592	0.350319
288587	ALKBH4	alkB, alkylation repair homolog 4 (E. coli)	0.153339	0.673514	0.244976	0.0409174	0.313217	0.216936	0.414267	0.818632	0.117873	0.422602	0.790869	0.198652	0.137253	0.785653	0.228915	0.901117	1	0.0403317	0.771022	1	0.0684082	0.642204	1	-0.131394	0.0231134	0.324234	0.292163	0.116076	0.512385	0.427991
303193	ALKBH5	alkB, alkylation repair homolog 5 (E. coli)	0.0465005	0.574078	1.15468	0.0468368	0.316324	0.646768	0.00742916	0.160842	0.941701	0.00693379	0.100632	0.763166	0.181385	0.817027	0.708003	0.883275	1	-0.00646342	0.0555361	0.618368	0.808303	0.0288403	0.748984	0.744343	0.0228896	0.322267	0.896284	0.675537	0.994183	0.154659
292780	ALKBH6	alkB, alkylation repair homolog 6 (E. coli)	0.310465	0.799829	0.207559	0.38329	0.708159	2.22815	0.0726392	0.40013	0.402673	0.250446	0.646422	1.37314	0.580032	1	-0.115823	0.424493	1	0.878753	0.104239	0.665241	0.391524	0.610773	1	0.682378	0.797585	1	-0.0883488	0.0820643	0.470754	2.29641
679944	ALKBH7	alkB, alkylation repair homolog 7 (E. coli)	0.940351	1	0.0310962	0.0882684	0.38357	-0.497735	0.258421	0.655483	0.433236	0.532179	0.880845	0.194467	0.307994	0.89779	-0.347119	0.0428311	1	-0.726145	0.45697	0.925901	0.346865	0.40204	0.980839	-0.360234	0.532103	0.953214	-0.287064	0.587425	0.934057	-0.314727
366783	ALKBH8	alkB, alkylation repair homolog 8 (E. coli)	0.676175	1	-0.102761	0.310915	0.638067	0.182178	0.208873	0.609781	-0.164151	0.757945	1	-0.0666325	0.708645	1	0.0678866	0.3882	1	0.234464	0.63506	1	-0.0869992	0.280888	0.91357	0.370968	0.682208	1	-0.0478497	0.654497	0.978209	-0.132846
246758	ALLC	allantoicase	0.183533	0.69949	0.386924	0.216816	0.533194	0.453262	0.455588	0.835507	0.118312	0.186962	0.566965	0.243846	0.173307	0.812328	0.366199	0.306225	1	0.177652	0.957733	1	0.0157885	0.185138	0.842122	0.290088	0.0113569	0.270894	0.53264	0.205781	0.639499	0.303673
297408	ALMS1	Alstrom syndrome 1	0.317945	0.806199	-0.232304	0.0454504	0.316239	-0.304187	0.131804	0.51243	-0.2766	0.0695294	0.356711	-0.307781	0.861865	1	-0.0221604	0.973061	1	-0.0315058	0.260918	0.786305	-0.227094	0.737547	1	-0.0955437	0.548277	0.953214	-0.104796	0.0907501	0.483263	-0.321739
287454	ALOX12	arachidonate 12-lipoxygenase	0.472661	0.873702	-0.133868	0.209062	0.526062	-0.219187	0.646763	0.981567	-0.0347466	0.19956	0.584539	-0.102976	0.883357	1	-0.0956978	0.240065	1	-0.123652	0.95258	1	-0.00265487	0.0968708	0.752639	-0.171392	0.55545	0.956469	-0.174695	0.254952	0.697146	-0.123337
287425	ALOX12B	arachidonate 12-lipoxygenase, 12R type	1	1	0	1	1	0	1	1	0	1	1	0	1	1	0	1	1	0	1	1	0	1	1	0	1	1	0	1	1	0
303252	Alox12e	arachidonate lipoxygenase, epidermal	0.422649	0.83352	-0.31872	0.422648	0.708159	-0.261626	0.63073	0.969671	-0.160057	0.395774	0.764011	-0.130813	0.233331	0.853489	-0.318024	0.304546	1	-0.130813	0.260631	0.786305	-0.303907	0.572368	1	-0.0872085	0.51075	0.951128	-0.174173	0.101841	0.494263	-0.261626
81639	ALOX15	arachidonate 15-lipoxygenase	0.636474	0.996887	-0.227844	0.701686	0.96904	-0.147486	0.58221	0.931864	-0.124507	0.989114	1	-0.0929443	0.556593	1	-0.0909527	0.595428	1	-0.175213	0.401967	0.889257	-0.226256	0.237995	0.888438	-0.403022	0.704528	1	-0.0734083	0.587857	0.934336	0.16615
266604	ALOX15B	arachidonate 15-lipoxygenase, type B	1	1	0	1	1	0	1	1	0	1	1	0	1	1	0	1	1	0	1	1	0	1	1	0	1	1	0	1	1	0
25290	ALOX5	arachidonate 5-lipoxygenase	0.251834	0.748427	-0.312309	0.191724	0.513184	0.569932	0.0675386	0.390614	-0.329159	0.805264	1	0.17181	0.780068	1	-0.049485	0.0801006	1	0.445663	0.0339355	0.612323	-0.394881	0.0637713	0.752639	0.635898	0.836563	1	-0.0436428	0.698054	1	0.139858
29624	ALOX5AP	arachidonate 5-lipoxygenase-activating protein	0.456122	0.859193	0.0822464	0.482293	0.763615	0.194541	0.541287	0.901359	0.149456	0.221689	0.609732	0.350865	0.956294	1	-0.0341857	0.734673	1	-0.039516	0.314386	0.831016	0.210293	0.205015	0.859516	0.374758	0.713433	1	-0.0896235	0.829654	1	-0.0764341
287424	ALOXE3	arachidonate lipoxygenase 3	0.143855	0.666728	0.433269	0.788124	1	-0.0211409	0.051921	0.353121	0.387166	0.297487	0.693557	0.19572	0.309109	0.89779	0.262103	0.22695	1	-0.223463	0.202566	0.741712	0.268328	0.746278	1	0.0528882	0.0796425	0.483948	0.381364	0.620027	0.95515	-0.0832766
24197	ALPPL2	alkaline phosphatase, placental-like 2	0.42265	0.83352	-0.102456	0.968926	1	0.011014	0.185869	0.584815	-0.0891614	0.867201	1	0.00550699	0.366741	0.938085	-0.0645226	0.934709	1	-0.0802635	0.161365	0.700136	-0.0891614	0.45143	0.998865	0.0967845	0.328117	0.807141	-0.0645226	0.512757	0.905648	-0.110689
365298	ALPK3	alpha-kinase 3	0.498218	0.894008	-0.296939	0.059785	0.339946	-0.373775	0.458152	0.83788	-0.168811	0.101119	0.425778	-0.348453	0.22237	0.844538	-0.294953	0.900897	1	-0.0570855	0.433957	0.909835	-0.1898	0.987424	1	-0.0192356	0.21711	0.67715	-0.261727	0.086976	0.476741	-0.48972
25586	ALPL	alkaline phosphatase, liver/bone/kidney	0.747605	1	0.161392	0.0466271	0.316324	1.74098	0.475327	0.852882	0.144251	0.274546	0.673511	0.653513	0.916203	1	-0.00586122	0.0869027	1	1.26126	0.895097	1	-0.0192919	0.740121	1	0.361765	0.436288	0.892225	0.226814	0.000412404	0.100332	2.01747
363235	ALS2	amyotrophic lateral sclerosis 2 (juvenile)	0.147384	0.670277	-0.45755	0.105648	0.408043	-0.269646	0.0787	0.413938	-0.332363	0.130556	0.474039	-0.365985	0.0880815	0.746467	-0.322811	0.702455	1	0.019094	0.0955999	0.659425	-0.320461	0.948136	1	-0.0263006	0.0387823	0.380013	-0.355481	0.196514	0.627753	-0.358976
501147	ALS2CR11	amyotrophic lateral sclerosis 2 (juvenile) chromosome region, candidate 11	1	1	0	1	1	0	0.45421	0.834589	-0.0870068	1	1	0	0.45421	0.962785	0.0870068	1	1	0	0.536795	0.952018	-0.0870068	1	1	0	0.536795	0.953214	0.0870068	1	1	0
316413	ALS2CR12	amyotrophic lateral sclerosis 2 (juvenile) chromosome region, candidate 12	0.573739	0.949619	0.255818	0.795784	1	-0.148066	0.10615	0.468893	0.503548	0.922648	1	0.120554	0.683355	1	0.00648548	0.631351	1	-0.159804	0.326511	0.838337	0.343277	0.581625	1	0.181503	0.822092	1	0.0825516	0.232054	0.672277	-0.342653
301446	ALS2CR8	amyotrophic lateral sclerosis 2 (juvenile) chromosome region, candidate 8	0.197531	0.707827	-0.574904	0.0654315	0.347737	-0.695924	0.0897746	0.439052	-0.401965	0.194796	0.578746	-0.48834	0.137024	0.785653	-0.377845	0.535754	1	-0.29274	0.130253	0.680364	-0.391434	0.693277	1	-0.219161	0.055985	0.430215	-0.443406	0.0680995	0.452148	-0.737123
25401	ALX1	ALX homeobox 1	1	1	0	1	1	0	1	1	0	0.304546	0.693557	0.102558	1	1	0	0.304546	1	-0.102558	1	1	0	0.572368	1	-0.0683723	1	1	0	0.572368	0.923051	0.0683723
365900	ALX3	ALX homeobox 3	1	1	0	1	1	0	1	1	0	1	1	0	1	1	0	1	1	0	1	1	0	1	1	0	1	1	0	1	1	0
296511	ALX4	ALX homeobox 4	0.42265	0.83352	0.182582	0.0854375	0.380712	-0.504226	0.405383	0.810485	0.262379	0.0933865	0.410525	-0.282852	0.975669	1	0.0114944	0.286278	1	-0.261268	0.831292	1	0.0600068	0.188227	0.846559	-0.297539	0.525076	0.953214	0.213867	0.0744924	0.459159	-0.38806
25284	AMACR	alpha-methylacyl-CoA racemase	0.0191965	0.509491	0.137731	0.775046	1	-0.02417	0.128486	0.507803	0.124856	0.806633	1	-0.0399022	0.589185	1	0.053031	0.999703	1	0.00198038	0.0325295	0.612323	0.168563	0.281879	0.91423	-0.123387	0.746333	1	0.0284636	0.43411	0.843329	0.0865769
25376	AMBN	ameloblastin (enamel matrix protein)	1	1	0	1	1	0	1	1	0	0.304546	0.693557	0.0873447	1	1	0	0.304546	1	-0.0873447	1	1	0	0.572368	1	-0.0582298	1	1	0	0.572368	0.923051	0.0582298
25377	AMBP	alpha-1-microglobulin/bikunin precursor	0.229236	0.733119	0.47303	0.441579	0.725387	0.150507	0.524145	0.889487	0.173269	0.774394	1	-0.174134	0.051038	0.721469	0.527236	0.457163	1	0.36767	0.779852	1	0.117511	0.356846	0.960045	-0.361769	0.0099435	0.264772	0.589021	0.150435	0.567383	0.576787
59319	AMBRA1	autophagy/beclin-1 regulator 1	0.0330621	0.544257	0.170721	0.0322522	0.296894	-0.125598	0.535965	0.898716	0.0726715	0.229481	0.621695	-0.101612	0.0448342	0.721469	0.156764	0.891233	1	-0.0524106	0.519962	0.952018	0.0590764	0.722595	1	-0.0511373	0.0135476	0.280335	0.188123	0.258049	0.69933	-0.125802
81640	AMD1	adenosylmethionine decarboxylase 1	0.144851	0.667257	0.325332	0.549986	0.830993	0.102066	0.691829	1	0.0776041	0.757816	1	0.0245718	0.0253467	0.721469	0.400382	0.339748	1	0.116601	0.600052	0.984943	0.114756	0.661767	1	0.0487707	0.0377582	0.377139	0.369905	0.348833	0.78043	0.100353
299735	AMDHD1	amidohydrolase domain containing 1	0.422647	0.83352	-0.179639	0.422647	0.708159	0.182555	0.45421	0.834589	-0.0898194	0.304546	0.693557	0.0912775	0.25281	0.857365	-0.0898194	0.395772	1	0.0912775	0.550415	0.952018	-0.0598796	0.101841	0.752639	0.182555	0.129883	0.564287	-0.179639	0.572368	0.923051	0.0608517
302972	AMDHD2	amidohydrolase domain containing 2	0.440076	0.848658	-0.181195	0.663143	0.935883	-0.0958079	0.899879	1	0.012334	0.612844	0.943817	0.112847	0.234738	0.854629	-0.287222	0.365025	1	-0.232278	0.799775	1	-0.0429642	0.404885	0.981948	-0.233579	0.377772	0.844424	-0.22986	0.696812	1	0.0979604
29160	AMELX	amelogenin, X-linked	0.675929	1	-0.187124	0.477298	0.758919	-0.277711	0.598506	0.94393	-0.117107	0.279324	0.678876	-0.358362	0.681401	1	-0.0372728	0.991803	1	-0.0400204	0.309891	0.827446	-0.237837	0.415141	0.983977	-0.285261	0.9953	1	-0.000746113	0.697958	1	-0.125244
25378	AMH	anti-Mullerian hormone	0.0662117	0.606934	-0.33276	0.807603	1	-0.130847	0.289047	0.691357	-0.161778	0.903473	1	-0.0182835	0.133505	0.784236	-0.275583	0.829095	1	-0.0460207	0.244874	0.772776	-0.199862	0.45716	1	-0.320975	0.114494	0.546094	-0.278685	0.722348	1	0.168693
29530	AMHR2	anti-Mullerian hormone receptor, type II	0.319558	0.807789	-0.338356	0.165297	0.48719	0.423146	0.553221	0.910451	-0.133316	0.12113	0.458004	0.297067	0.152069	0.794668	-0.328051	0.201175	1	0.247596	0.368363	0.86658	-0.212472	0.40256	0.981109	0.16496	0.236166	0.701245	-0.279673	0.0102166	0.24897	0.43974
295365	AMIGO1	adhesion molecule with Ig-like domain 1	0.0362277	0.555306	-0.170475	0.0157149	0.256714	-0.424396	0.788344	1	0.0578777	0.0741793	0.366591	-0.468676	0.0351393	0.721469	-0.277289	0.845924	1	-0.0434288	0.76276	1	0.0446403	0.803687	1	-0.140301	0.0320198	0.359325	-0.288253	0.144852	0.559851	-0.454797
300186	AMIGO2	adhesion molecule with Ig-like domain 2	0.0083776	0.471776	0.748969	0.0426477	0.315028	0.520537	0.0113366	0.189583	0.545969	0.632568	0.959862	0.116559	0.0645124	0.739543	0.474126	0.0391221	1	0.455565	0.0310523	0.612323	0.516977	0.847246	1	0.0316125	0.013676	0.281622	0.572024	0.000807517	0.111191	0.679633
316003	AMIGO3	adhesion molecule with Ig-like domain 3	0.178699	0.69949	0.453161	0.302751	0.629376	0.473349	0.0592558	0.371002	0.372902	0.0168449	0.167827	0.669314	0.431999	0.962785	0.173827	0.601436	1	-0.215461	0.279408	0.803852	0.26086	0.332784	0.946835	0.34822	0.084759	0.494001	0.374544	0.414456	0.827652	0.276413
307526	AMMECR1L	AMMECR1-like	0.40378	0.83352	-0.0419543	0.131068	0.442484	0.315693	0.113204	0.480766	-0.114342	0.325139	0.715755	0.219553	0.393936	0.95852	0.0716741	0.258668	1	0.174096	0.327506	0.838614	-0.0895956	0.0178184	0.74747	0.384944	0.81401	1	0.0334188	0.817806	1	0.0619654
314459	AMN	amnion associated transmembrane protein	0.712901	1	-0.148702	0.829406	1	0.0912604	0.553003	0.910254	0.140057	0.151544	0.511049	0.551945	0.223371	0.844538	-0.418421	0.231294	1	-0.457546	0.715292	1	0.140664	0.84384	1	0.1262	0.291462	0.76812	-0.382154	0.970119	1	-0.00347388
302032	AMN1	antagonist of mitotic exit network 1 homolog (S. cerevisiae)	0.00941459	0.471776	-0.261487	0.0930884	0.390948	-0.421548	0.0697719	0.394783	-0.192002	0.0153521	0.158394	-0.27294	0.297681	0.889716	-0.159493	0.196339	1	-0.170683	0.438183	0.912078	-0.106927	0.0264981	0.74747	-0.308241	0.00925517	0.264366	-0.271725	0.0532017	0.416708	-0.261181
65157	AMOTL2	angiomotin like 2	0.15553	0.674773	0.573634	0.0621612	0.343526	0.480464	0.0113438	0.189583	0.572678	0.01162	0.13582	0.586726	0.657167	1	0.200042	0.998432	1	0.0117749	0.115939	0.677548	0.454418	0.0130277	0.74747	0.591712	0.182508	0.626509	0.37679	0.777546	1	0.0882526
25028	AMPD1	adenosine monophosphate deaminase 1	0.216156	0.720638	-0.178726	0.117246	0.423389	0.591448	0.064701	0.384592	-0.330411	0.0517362	0.308543	0.383629	0.561632	1	0.1241	0.0672158	1	0.304994	0.0596924	0.623149	-0.364183	0.0121172	0.74747	0.4568	0.653502	1	0.116686	0.0843239	0.474422	0.364189
362015	AMPD2	adenosine monophosphate deaminase 2	0.0441603	0.568226	-0.537644	0.0081042	0.245683	-0.735382	0.00446407	0.129992	-0.414065	0.00365629	0.070199	-0.546231	0.188637	0.817027	-0.305339	0.1921	1	-0.325591	0.0339635	0.612323	-0.390509	0.0625727	0.751369	-0.437453	0.0257016	0.335659	-0.386937	0.00929537	0.240944	-0.588536
25095	AMPD3	adenosine monophosphate deaminase 3	0.371778	0.83352	0.261747	0.100876	0.402503	0.567554	0.0634506	0.381959	0.438611	0.00052305	0.0253776	0.668618	0.804676	1	-0.0133306	0.853285	1	0.0577555	0.0704005	0.634751	0.426831	0.0443513	0.750579	0.528106	0.880236	1	-0.0233244	0.380522	0.809732	0.281573
60668	AMPH	amphiphysin	0.30213	0.792527	-0.356235	0.515127	0.796993	0.554505	0.0526294	0.35384	-0.35103	0.814258	1	-0.102379	0.468782	0.970244	-0.180009	0.13227	1	0.577864	0.102011	0.664849	-0.312006	0.604324	1	0.205025	0.245848	0.710752	-0.221242	0.391537	0.819358	0.507976
306586	AMT	aminomethyltransferase	0.500191	0.895313	0.17233	0.246724	0.56688	-0.29166	0.523128	0.889159	-0.0764473	0.0549278	0.316668	-0.359307	0.0700222	0.739543	0.371405	0.791081	1	0.0183784	0.761283	1	-0.0689175	0.128489	0.776271	-0.342383	0.136663	0.56682	0.339566	0.816327	1	-0.0629193
689404	AMTN	amelotin	0.642885	1	0.158883	0.126856	0.437143	-0.423427	0.269454	0.666408	0.229843	0.013495	0.147534	-0.749592	0.941785	1	-0.0743637	0.396986	1	0.309524	0.316435	0.831962	0.205434	0.107663	0.753165	-0.605526	0.973493	1	0.0052753	0.952171	1	0.0354098
24203	AMY1A (includes others)	amylase, alpha 1A (salivary)	0.0500622	0.580922	-0.800702	0.241481	0.561207	0.261093	0.068075	0.391001	-0.598837	0.999915	1	0.0263645	0.144004	0.790296	-0.512396	0.0642403	1	0.273998	0.0113287	0.612323	-0.72308	0.390692	0.979751	0.149974	0.219636	0.681808	-0.448032	0.27197	0.709312	0.21124
497039	AMY2A	amylase, alpha 2A (pancreatic)	0.914265	1	-0.110133	0.738692	1	0.302782	0.828057	1	0.222917	0.763085	1	0.0806181	0.610061	1	-0.0755217	0.703617	1	0.151962	0.75733	1	0.232442	0.79784	1	0.160483	0.526309	0.953214	-0.293443	0.611856	0.951155	0.219826
304317	AMZ1	archaelysin family metallopeptidase 1	0.182555	0.69949	0.509144	0.0630957	0.344601	0.503117	0.256617	0.653661	0.353166	0.497453	0.850735	0.157927	0.203707	0.824566	0.368506	0.061522	1	0.426225	0.316481	0.831962	0.269267	0.709722	1	0.0950275	0.105647	0.529224	0.480435	0.00423915	0.192078	0.602807
360650	AMZ2	archaelysin family metallopeptidase 2	0.0113741	0.484351	-0.420034	0.0517432	0.325281	-0.34839	0.0014364	0.0862619	-0.32489	4.23236e-05	0.00807517	-0.380615	0.101102	0.758037	-0.222092	0.976163	1	-0.00236538	0.0145664	0.612323	-0.307986	0.100059	0.752639	-0.265587	0.0234987	0.325459	-0.294375	0.192983	0.622693	-0.210463
311412	ANAPC1	anaphase promoting complex subunit 1	0.126818	0.656148	-0.269376	0.419415	0.708159	-0.109797	0.0202299	0.240874	-0.240376	0.292078	0.693174	-0.168607	0.405842	0.962785	-0.104155	0.714311	1	0.0449105	0.0857722	0.650004	-0.210323	0.837762	1	0.0226052	0.138097	0.57029	-0.173896	0.334344	0.76785	-0.173634
361389	ANAPC10	anaphase promoting complex subunit 10	0.245742	0.744038	-0.0377267	0.536366	0.817095	0.0700485	0.113333	0.481018	-0.0687645	0.765683	1	-0.0153531	0.681146	1	0.0225263	0.423756	1	0.125541	0.283562	0.806965	-0.0534425	0.458507	1	0.11597	0.930603	1	0.000303088	0.854942	1	-0.00919278
498030	ANAPC11	anaphase promoting complex subunit 11	0.876568	1	-0.0202345	0.250247	0.571044	0.203483	0.548878	0.907324	0.0758183	0.188702	0.56974	0.327028	0.429334	0.962785	-0.115667	0.631163	1	-0.0701447	0.907679	1	-0.00532295	0.826409	1	-0.0293166	0.937393	1	-0.0281943	0.258369	0.69933	0.318428
685029	ANAPC13	anaphase promoting complex subunit 13	0.278734	0.772408	0.360218	0.133637	0.445544	-0.84555	0.341822	0.748712	0.368274	0.717683	1	-0.188474	0.713916	1	0.0996717	0.0833489	1	-0.708539	0.427107	0.904456	0.325886	0.5532	1	-0.277891	0.544708	0.953214	0.190314	0.0682756	0.452148	-0.866664
293155	ANAPC15	anaphase promoting complex subunit 15	0.997107	1	-0.000727609	0.585863	0.864879	-0.126704	0.560275	0.916614	0.128196	0.698802	1	0.073575	0.557124	1	-0.144358	0.387601	1	-0.163467	0.636061	1	0.117892	0.398026	0.979785	-0.230972	0.632417	1	-0.124007	0.753945	1	0.0743034
296558	ANAPC2	anaphase promoting complex subunit 2	0.110857	0.644353	0.411392	0.493419	0.775178	-0.0943603	0.0157025	0.216647	0.400047	0.925053	1	0.0251704	0.484413	0.980432	0.115659	0.297513	1	-0.14973	0.0675871	0.628188	0.352711	0.929816	1	-0.017977	0.236333	0.701245	0.230583	0.370715	0.802195	-0.117903
305420	ANAPC4	anaphase promoting complex subunit 4	0.564434	0.943493	0.0487936	0.747371	1	0.0453428	0.905279	1	-0.00781647	0.414299	0.781688	0.0391657	0.316857	0.903538	0.0806458	0.826365	1	-0.00624425	0.770536	1	0.0210553	0.614999	1	0.0420252	0.54454	0.953214	0.0520147	0.8774	1	0.0142914
288671	ANAPC5	anaphase promoting complex subunit 5	0.997071	1	0.000341342	0.173367	0.49783	0.162547	0.965341	1	-0.00746132	0.987474	1	-0.0166279	0.968912	1	-0.017952	0.182577	1	0.199156	0.737992	1	-0.0267093	0.694862	1	-0.0522926	0.734354	1	0.0185795	0.0480145	0.399628	0.275683
304490	ANAPC7	anaphase promoting complex subunit 7	0.0760509	0.615352	0.287445	0.0678338	0.350276	0.254137	0.748879	1	0.0792924	0.00731349	0.103532	0.254419	0.0219876	0.721469	0.329344	0.81567	1	0.0437685	0.497797	0.952018	0.103079	0.192865	0.851232	0.159166	0.0291285	0.350324	0.320578	0.103915	0.494263	0.194367
25030	Andpro (includes others)	similar to Cystatin-related protein 2 precursor (Prostatic 22 kDa glycoprotein P22K15)	1	1	0	1	1	0	1	1	0	1	1	0	1	1	0	1	1	0	1	1	0	1	1	0	1	1	0	1	1	0
497229	ANG	angiogenin, ribonuclease, RNase A family, 5	1	1	0	1	1	0	1	1	0	1	1	0	1	1	0	1	1	0	1	1	0	1	1	0	1	1	0	1	1	0
305843	ANG	angiogenin, ribonuclease, RNase A family, 5	0.203515	0.709619	0.567843	0.250412	0.57107	-0.634839	0.415459	0.82013	0.305369	0.243886	0.641047	-0.342271	0.135059	0.785112	0.576826	0.253141	1	-0.391642	0.454221	0.923628	0.269073	0.361329	0.96213	-0.327747	0.0778112	0.479144	0.592835	0.0850318	0.475159	-0.55173
362765	ANGEL1	angel homolog 1 (Drosophila)	0.17946	0.69949	-0.208207	0.0210786	0.274464	-0.28074	0.152406	0.540005	-0.122834	0.145812	0.500855	-0.171258	0.134052	0.784236	-0.148843	0.455242	1	-0.145385	0.419778	0.901377	-0.0908568	0.644227	1	-0.0947814	0.0094849	0.264366	-0.20791	0.0351555	0.365009	-0.291506
305035	Angel2	angel homolog 2 (Drosophila)	0.0455796	0.56866	-0.507836	0.0328266	0.297902	-0.320971	0.0837417	0.427366	-0.315863	0.346621	0.737973	-0.22423	0.0431145	0.721469	-0.3903	0.529607	1	-0.168447	0.241685	0.772504	-0.258327	0.875304	1	0.0228069	0.000358179	0.119604	-0.484897	0.0367764	0.369144	-0.47467
89807	ANGPT1	angiopoietin 1	0.198455	0.707827	-0.333654	0.473049	0.754776	-0.406402	0.499675	0.872229	-0.149593	0.201982	0.588195	-0.420466	0.0856023	0.745898	-0.348541	0.824376	1	-0.00129936	0.679768	1	-0.112102	0.645243	1	0.18012	0.0298454	0.353255	-0.387597	0.0834964	0.473035	-0.72711
89805	ANGPT2	angiopoietin 2	0.0521905	0.588393	0.432094	0.321292	0.651333	-0.403049	0.0359688	0.304448	0.318523	0.0334396	0.242228	-0.554033	0.129187	0.784236	0.28498	0.961753	1	-0.0189698	0.175842	0.715436	0.239607	0.0415199	0.750579	-0.535119	0.0052131	0.228759	0.393655	0.901943	1	-0.0589311
296269	ANGPT4	angiopoietin 4	0.930732	1	-0.0210802	0.254228	0.574663	-0.254101	0.463043	0.842122	0.129279	0.760084	1	-0.0351811	0.38826	0.955142	-0.173552	0.1542	1	-0.250683	0.322218	0.836873	0.229656	0.44006	0.992846	-0.129588	0.257145	0.725908	-0.265494	0.259738	0.700013	-0.219801
679942	Angptl1	angiopoietin-like 1	0.00245895	0.452792	-0.888249	0.850744	1	-0.0703754	0.0130764	0.200804	-0.638968	0.953942	1	-0.0230658	0.0665608	0.739543	-0.530869	0.873583	1	0.0415991	0.035718	0.612323	-0.60395	0.485337	1	0.330505	0.0113734	0.270894	-0.674244	0.334642	0.767951	-0.394702
171100	ANGPTL2	angiopoietin-like 2	0.3076	0.796989	-0.257726	0.507647	0.789735	-0.129333	0.7577	1	-0.105221	0.82445	1	0.00290695	0.0546054	0.726854	-0.302296	0.646104	1	-0.135504	0.436648	0.910949	-0.148738	0.996262	1	0.000150598	0.156349	0.591229	-0.244827	0.449598	0.857184	-0.173683
502970	ANGPTL3	angiopoietin-like 3	0.107696	0.642516	-0.816119	0.193003	0.5138	0.197896	0.498575	0.871559	-0.299451	0.782477	1	0.0316062	0.0464585	0.721469	-0.806458	0.424319	1	0.194191	0.483616	0.943591	-0.272942	0.114325	0.758153	0.346352	0.0194692	0.305511	-0.911813	0.788667	1	-0.0731902
362850	ANGPTL4	angiopoietin-like 4	0.0472953	0.576549	2.26065	0.000855048	0.219082	2.06712	0.0452388	0.337081	1.53155	0.127736	0.469836	1.13511	0.0618392	0.73794	1.54092	0.0902512	1	1.27402	0.131418	0.680364	1.30594	0.492868	1	0.585188	0.00204447	0.182369	1.97887	3.33948e-05	0.0517681	2.28498
298698	ANGPTL6	angiopoietin-like 6	0.210993	0.71696	0.322528	0.696675	0.964505	0.0879909	0.0374491	0.310345	0.309556	0.358266	0.750055	0.211943	0.649104	1	0.0679618	0.577371	1	-0.089525	0.0762677	0.642746	0.304475	0.559442	1	-0.141291	0.379179	0.845608	0.143892	0.320303	0.754566	0.270088
306570	ANK1	ankyrin 1, erythrocytic	0.853239	1	-0.0233619	0.116532	0.422694	0.638363	0.262871	0.659308	-0.125173	0.0202478	0.18596	0.513642	0.393372	0.958394	0.0576624	0.352177	1	0.231945	0.901803	1	-0.0268162	0.0530932	0.751369	0.484379	0.896704	1	-0.0190493	0.133451	0.542619	0.402513
361833	ANK3	ankyrin 3, node of Ranvier (ankyrin G)	0.632657	0.993948	-0.109467	0.306138	0.633515	-0.158741	0.299326	0.702816	-0.123001	0.0974588	0.4177	-0.301186	0.91959	1	0.0214141	0.423982	1	0.136465	0.543731	0.952018	-0.105792	0.964414	1	-0.0456226	0.698439	1	-0.0375379	0.40788	0.82448	-0.168026
303292	Ankfy1	ankyrin repeat and FYVE domain containing 1	0.0858227	0.624514	-0.298317	0.902813	1	-0.0164853	0.0411345	0.323865	-0.229657	0.521819	0.871062	-0.110088	0.151255	0.792854	-0.18225	0.573027	1	0.0856655	0.0957084	0.659425	-0.205597	0.465578	1	0.161628	0.0378183	0.377288	-0.230023	0.413664	0.827158	-0.186254
114506	ANKH	ankylosis, progressive homolog (mouse)	0.63048	0.992519	-0.0508695	0.123729	0.434266	-0.450644	0.844743	1	0.0131364	0.140295	0.490897	-0.377295	0.263089	0.861782	-0.110225	0.573781	1	-0.184109	0.628048	1	0.0322276	0.8835	1	-0.0492758	0.142413	0.575398	-0.11546	0.0170253	0.292573	-0.588503
100529260	Ankhd1	ankyrin repeat and KH domain containing 1	0.938464	1	0.0115786	0.941435	1	-0.00914761	0.414909	0.819502	-0.120611	0.713854	1	-0.0447189	0.355913	0.931094	0.144763	0.734814	1	0.0454619	0.543533	0.952018	-0.104267	0.304917	0.931678	0.355535	0.469194	0.918521	0.123896	0.289434	0.722588	-0.364434
368062	ANKIB1	ankyrin repeat and IBR domain containing 1	0.470129	0.871976	-0.231557	0.792052	1	-0.0698545	0.191102	0.593376	-0.25725	0.425308	0.793382	-0.202958	0.88532	1	-0.0173922	0.62698	1	0.130187	0.444252	0.916828	-0.181101	0.732959	1	0.0794127	0.464411	0.915809	-0.142003	0.49286	0.89102	-0.173524
360829	ANKLE2	ankyrin repeat and LEM domain containing 2	0.837583	1	-0.0324462	0.112485	0.416982	0.101753	0.573076	0.925069	-0.119583	0.770215	1	-0.0634352	0.725555	1	0.09596	0.584714	1	0.187332	0.765565	1	-0.0795946	0.384638	0.97568	0.378751	0.941706	1	0.0392738	0.563192	0.923051	-0.235698
314046	ANKMY2	ankyrin repeat and MYND domain containing 2	0.290626	0.7844	-0.219303	0.118809	0.426141	-0.210257	0.0323924	0.292184	-0.235408	0.00328248	0.0659205	-0.265865	0.654715	1	-0.0611904	0.745886	1	0.0379906	0.0958003	0.659425	-0.205249	0.102705	0.752639	-0.198912	0.387697	0.852373	-0.11292	0.434292	0.843329	-0.0873037
294679	ANKRA2	ankyrin repeat, family A (RFXANK-like), 2	0.623278	0.986213	0.0613303	0.16806	0.490332	0.1999	0.709262	1	0.0340046	0.362844	0.754425	0.107653	0.66329	1	0.0803512	0.412749	1	0.131896	0.808582	1	0.0336479	0.80623	1	0.0427366	0.547634	0.953214	0.065801	0.070035	0.453981	0.237014
27064	ANKRD1	ankyrin repeat domain 1 (cardiac muscle)	0.00108143	0.452792	0.961124	0.0641523	0.34528	-0.216692	0.034444	0.298858	0.676077	0.704027	1	-0.0600205	0.116467	0.774587	0.601641	0.438267	1	-0.188435	0.146123	0.689584	0.586468	0.576915	1	0.136762	0.010076	0.264772	0.800563	0.0301129	0.348983	-0.436272
361183	ANKRD10	ankyrin repeat domain 10	0.365123	0.83352	-0.176002	0.0909666	0.386863	-0.480474	0.0873189	0.433473	-0.2628	0.00391526	0.0730244	-0.468655	0.908053	1	0.0729019	0.723045	1	-0.074586	0.0703387	0.634751	-0.262025	0.0369466	0.750579	-0.408631	0.891407	1	0.0227237	0.246199	0.686103	-0.252923
316775	ANKRD12	ankyrin repeat domain 12	0.120901	0.651787	-0.480996	0.801593	1	0.0495488	0.0283983	0.276586	-0.418339	0.735395	1	-0.051441	0.413223	0.962785	-0.190172	0.61139	1	0.142342	0.124595	0.680364	-0.355345	0.341185	0.948632	0.310533	0.116293	0.549849	-0.328488	0.450658	0.858222	-0.230684
360823	ANKRD13A	ankyrin repeat domain 13A	0.00431975	0.452792	0.271577	0.00179349	0.219304	0.177241	0.0569849	0.365321	0.167243	0.0965646	0.416664	0.0968449	0.0380871	0.721469	0.191283	0.0237432	1	0.107461	0.167728	0.705433	0.1316	0.0025374	0.74747	0.144391	0.000179866	0.104023	0.259485	0.0864953	0.476183	0.100952
685374	ANKRD13C	ankyrin repeat domain 13C	0.405826	0.83352	-0.0490224	0.133828	0.445782	0.587733	0.120133	0.491319	-0.167455	0.359423	0.750856	0.193549	0.345195	0.921856	0.116173	0.0406086	1	0.426852	0.448176	0.918684	-0.104869	0.274357	0.906889	0.267429	0.845825	1	0.0387532	0.0185241	0.298387	0.527105
361699	ANKRD13D	ankyrin repeat domain 13 family, member D	0.766656	1	-0.0618505	0.0570134	0.334443	-0.265846	0.454315	0.834589	-0.101033	0.030141	0.229244	-0.410085	0.87271	1	-0.0561335	0.650865	1	0.0801219	0.957052	1	-0.0112196	0.108446	0.753396	-0.357385	0.496889	0.941507	-0.10302	0.988842	1	-0.0184488
307102	ANKRD16	ankyrin repeat domain 16	0.814682	1	0.02474	0.455829	0.737097	-0.0811532	0.736493	1	-0.0404016	0.313377	0.703972	-0.0951795	0.538532	1	0.103382	0.9423	1	0.0247985	0.66558	1	-0.0500639	0.105516	0.752639	-0.160445	0.468119	0.917736	0.0957972	0.619539	0.954999	0.0558316
289521	ANKRD17	ankyrin repeat domain 17	0.176411	0.699397	0.168274	0.179004	0.504709	0.0788429	0.767014	1	0.0296326	0.862758	1	0.00601857	0.101988	0.758183	0.195926	0.655952	1	0.0876643	0.670353	1	0.0450532	0.308581	0.933582	0.312624	0.0927734	0.5097	0.198407	0.484137	0.884828	-0.202554
309374	ANKRD2	ankyrin repeat domain 2 (stretch responsive muscle)	0.454846	0.858762	0.390966	0.556674	0.837618	-0.0846117	0.379094	0.787516	0.188859	0.881567	1	-0.0243321	0.489105	0.983613	0.169799	0.380922	1	-0.118417	0.804139	1	0.0569583	0.27318	0.90612	-0.14883	0.137269	0.568642	0.45356	0.788235	1	0.0166357
294093	ANKRD22	ankyrin repeat domain 22	0.183603	0.69949	-0.475537	0.237935	0.557183	-0.664743	0.0898764	0.439195	-0.446095	0.435219	0.801672	-0.147056	0.406609	0.962785	-0.26721	0.0858595	1	-0.530723	0.00813115	0.612323	-0.561847	0.665356	1	-0.186185	0.594936	0.982092	-0.151458	0.021244	0.31321	-0.704484
316330	ANKRD23	ankyrin repeat domain 23	0.233217	0.736506	0.989467	0.813684	1	0.0585991	0.416107	0.820676	0.400428	0.924131	1	0.076076	0.0483968	0.721469	1.10568	0.795762	1	0.00843066	0.587428	0.976371	0.385419	0.497379	1	0.139124	0.0211174	0.314252	1.10609	0.781918	1	-0.0523561
299639	ANKRD24	ankyrin repeat domain 24	0.786657	1	-0.0607249	0.472783	0.754592	1.44357	0.64334	0.979008	0.0781993	0.337657	0.729152	0.833204	0.311934	0.901107	-0.139506	0.532553	1	0.568891	0.514486	0.952018	0.107497	0.746503	1	0.374579	0.198414	0.651183	-0.188657	0.135286	0.545017	1.53635
361555	ANKRD27	ankyrin repeat domain 27 (VPS9 domain)	0.259008	0.753629	-0.232091	0.554193	0.835287	0.267165	0.138864	0.521877	-0.170672	0.954769	1	-0.0135136	0.130991	0.784236	-0.170862	0.199236	1	0.241931	0.0481097	0.612323	-0.200535	0.810313	1	0.036938	0.195753	0.647307	-0.145401	0.24568	0.685661	0.306366
498823	ANKRD29	ankyrin repeat domain 29	0.0758452	0.615352	-0.415629	0.0384047	0.307491	-0.824778	0.00759063	0.16183	-0.427978	0.00224678	0.0541612	-1.05172	0.564068	1	-0.126342	0.858751	1	0.115409	0.0897275	0.654655	-0.341141	0.0881026	0.752639	-0.773158	0.205368	0.661639	-0.259262	0.520999	0.912821	-0.363724
294601	ANKRD32	ankyrin repeat domain 32	0.0583408	0.596709	-0.667386	0.0843946	0.379479	-0.353578	0.0315514	0.29015	-0.445805	0.667154	0.984203	-0.0900255	0.0361297	0.721469	-0.465852	0.198761	1	-0.302809	0.0289241	0.612323	-0.473451	0.964597	1	-0.012688	0.0152322	0.288869	-0.49782	0.0396708	0.377953	-0.471834
310200	ANKRD33B	ankyrin repeat domain 33B	0.136058	0.661782	0.549075	0.0418518	0.313797	0.490748	0.0550601	0.36003	0.412715	0.0307518	0.230912	0.386135	0.0877543	0.746033	0.387408	0.327513	1	0.201358	0.0362125	0.612323	0.424076	0.160001	0.824553	0.295646	0.0673766	0.455333	0.391707	0.045215	0.39307	0.390933
295283	ANKRD34A	ankyrin repeat domain 34A	0.855843	1	0.0664395	0.404828	0.708159	-0.33259	0.966603	1	0.0390689	0.199138	0.583805	-0.253095	0.581275	1	0.139742	0.348005	1	-0.202562	0.756304	1	0.0711692	0.242812	0.890255	-0.224053	0.826323	1	0.054874	0.193752	0.62457	-0.260424
499506	ANKRD34B	ankyrin repeat domain 34B	0.775569	1	0.103128	1	1	0	0.534187	0.897425	0.0543693	0.130557	0.474039	-0.350731	0.996306	1	-0.0343965	0.130557	1	0.350731	0.915945	1	0.0262559	0.325267	0.944146	-0.25948	0.578335	0.972453	0.08353	0.325267	0.758564	0.25948
300889	ANKRD34C	ankyrin repeat domain 34C	0.22685	0.730708	0.668045	0.226514	0.544158	0.476947	0.361888	0.768929	0.450355	0.482514	0.839834	0.243102	0.174834	0.81284	0.590956	0.489295	1	0.19395	0.228863	0.76417	0.45631	0.0806431	0.752639	0.695699	0.219775	0.681992	0.558839	0.930945	1	-0.0730675
361149	ANKRD37	ankyrin repeat domain 37	0.586689	0.959505	0.264394	0.550619	0.831519	-0.158334	0.193497	0.595322	0.342862	0.281312	0.681065	0.29149	0.871231	1	0.143503	0.0752938	1	-0.406623	0.526024	0.952018	0.199453	0.865807	1	-0.015469	0.374638	0.841806	0.227062	0.615204	0.953401	-0.181243
367251	ANKRD39	ankyrin repeat domain 39	0.441403	0.849099	0.214976	0.172336	0.496093	0.406031	0.215034	0.6189	0.218447	0.0828499	0.38677	0.432344	0.768651	1	0.148804	0.916963	1	0.0196889	0.726915	1	0.10183	0.412009	0.982704	0.236613	0.199919	0.653854	0.235563	0.249641	0.690635	0.320096
690586	ANKRD40	ankyrin repeat domain 40	0.901573	1	0.0321019	0.0834523	0.378324	-0.124752	0.621583	0.962937	-0.0555879	0.0137715	0.148907	-0.234805	0.424826	0.962785	0.157753	0.425616	1	0.0769738	0.791476	1	-0.0296681	0.26167	0.900187	-0.128741	0.576418	0.972113	0.0958249	0.735938	1	-0.0486218
293117	ANKRD42	ankyrin repeat domain 42	0.0608494	0.599932	0.294774	0.37354	0.703926	-0.150597	0.0187748	0.233554	0.310841	0.651639	0.973115	0.0571848	0.741239	1	0.104626	0.0801759	1	-0.184244	0.317493	0.832471	0.180435	0.64583	1	-0.0572613	0.131039	0.564287	0.252828	0.38032	0.809606	-0.135689
301415	ANKRD44	ankyrin repeat domain 44	0.357989	0.83352	-0.100077	0.436128	0.720324	-0.158382	0.0666802	0.38836	-0.241321	0.0416741	0.273808	-0.326309	0.344852	0.921487	0.140918	0.363982	1	0.148461	0.491658	0.948547	-0.143877	0.638732	1	-0.11004	0.895955	1	0.0103323	0.543345	0.922139	-0.107625
299982	ANKRD46	ankyrin repeat domain 46	0.0036042	0.452792	-0.246101	0.197842	0.516737	-0.116429	0.395358	0.801159	-0.114571	0.605263	0.939106	0.0401495	0.0500429	0.721469	-0.212959	0.0903769	1	-0.174303	0.49213	0.949147	-0.0794843	0.662463	1	0.0659923	0.00310073	0.201124	-0.275793	0.0535485	0.417169	-0.227139
315434	ANKRD49	ankyrin repeat domain 49	0.477712	0.87704	-0.0934659	0.0757464	0.364074	0.36799	0.0922137	0.444494	-0.112313	0.0278803	0.220428	0.312749	0.966	1	0.0214632	0.419262	1	0.166988	0.423874	0.902223	-0.0634602	0.180142	0.838773	0.214349	0.517777	0.953214	-0.0602888	0.0534774	0.417169	0.313554
296184	ANKEF1	ankyrin repeat and EF-hand domain containing 1	0.424607	0.835348	-0.294075	0.188308	0.50997	-0.29423	0.324497	0.731074	-0.211918	0.422416	0.790705	-0.135144	0.243878	0.857365	-0.253004	0.292441	1	-0.225512	0.362714	0.864035	-0.195096	0.897628	1	-0.0409522	0.173365	0.615041	-0.253953	0.0344615	0.363473	-0.373497
294988	ANKRD50	ankyrin repeat domain 50	0.400505	0.83352	-0.333826	0.260089	0.58146	-0.259363	0.0813659	0.419944	-0.35904	0.117957	0.453291	-0.419891	0.703384	1	-0.112366	0.643458	1	0.080523	0.21497	0.753088	-0.28695	0.929157	1	-0.0568399	0.361841	0.836812	-0.204011	0.281685	0.715237	-0.315646
362811	ANKRD52	ankyrin repeat domain 52	0.636449	0.996887	0.120485	0.499975	0.782149	0.0776615	0.243137	0.650829	0.135207	0.603651	0.937848	-0.170078	0.963606	1	0.0159579	0.515673	1	0.286007	0.444071	0.916782	0.10273	0.384691	0.97568	0.553311	0.655643	1	0.0681432	0.471513	0.875538	-0.437006
362957	ANKRD54	ankyrin repeat domain 54	0.482735	0.880894	-0.0370037	0.060697	0.341868	-0.148752	0.0706114	0.396476	-0.0937933	0.371847	0.762137	-0.194489	0.398661	0.960012	0.057377	0.966379	1	0.0310741	0.176176	0.715713	-0.0832454	0.0684839	0.752639	-0.347769	0.630856	1	0.0341029	0.445433	0.852447	0.144546
361898	ANKRD55	ankyrin repeat domain 55	0.134492	0.660825	0.263763	0.025751	0.285274	0.36438	0.257542	0.654799	0.148814	0.031676	0.234826	0.293502	0.0968245	0.755267	0.21339	0.338268	1	0.122463	0.316227	0.831962	0.130543	0.0171016	0.74747	0.328022	0.029527	0.352874	0.253955	0.251998	0.693804	0.175012
500430	ANKRD6	ankyrin repeat domain 6	0.00557143	0.454859	-0.246059	0.325163	0.655638	-0.135312	0.026892	0.27175	-0.190878	0.19686	0.580281	-0.261506	0.21227	0.834562	-0.142369	0.637379	1	0.0975747	0.207088	0.748449	-0.136848	0.196729	0.854597	-0.261209	0.00989581	0.264772	-0.220293	0.704496	1	0.0712532
689907	Ankrd61	ankyrin repeat domain 61	0.327806	0.815108	0.485597	0.263591	0.585689	0.259188	0.249141	0.650829	0.315135	0.841544	1	0.110546	0.244968	0.857365	0.365689	0.35803	1	0.240474	0.249987	0.778167	0.327024	0.0913382	0.752639	0.479464	0.180401	0.623499	0.385515	0.726062	1	-0.103269
680734	ANKRD65	ankyrin repeat domain 65	0.253921	0.749182	-0.239541	0.763725	1	-0.0643784	0.11617	0.485346	-0.230887	0.882612	1	0.0130446	0.371328	0.941137	-0.134481	0.507154	1	-0.0381539	0.0251223	0.612323	-0.267905	0.922075	1	0.00317163	0.565734	0.963621	-0.0934258	0.411464	0.826806	-0.0759198
502733	ANKRD7	ankyrin repeat domain 7	0.866623	1	-0.0620212	0.892096	1	0.0418367	0.464904	0.844063	-0.175979	0.652848	0.974237	-0.0602507	0.685421	1	-0.0129288	0.502947	1	0.190996	0.957129	1	-0.0405636	0.941063	1	-0.00130979	0.775409	1	-0.0844268	0.752385	1	0.0867282
314457	ANKRD9	ankyrin repeat domain 9	0.00490378	0.452792	1.28007	0.042906	0.315177	0.994486	0.00283253	0.11057	0.977741	0.0102387	0.126114	0.727949	0.0894333	0.747326	0.758143	0.256742	1	0.368662	0.0345867	0.612323	0.854517	0.189767	0.848404	0.461763	0.00363862	0.206886	1.00418	0.00252422	0.168533	0.89826
309639	ANKS1A	ankyrin repeat and sterile alpha motif domain containing 1A	0.404538	0.83352	-0.0451775	0.174448	0.498622	-0.0487961	0.861386	1	0.0299797	0.907638	1	0.0161469	0.466299	0.969386	-0.101425	0.593847	1	-0.0804454	0.837096	1	0.0219131	0.553913	1	0.0488782	0.438116	0.892343	-0.0909058	0.171929	0.597785	-0.119107
314721	Anks1b	ankyrin repeat and sterile alpha motif domain containing 1B	0.768352	1	-0.0708665	0.00416236	0.233483	-1.09653	0.473829	0.852304	-0.122183	0.00953675	0.121112	-1.0656	0.798396	1	0.062723	0.743777	1	-0.221083	0.874483	1	-0.045084	0.424103	0.986362	-0.414291	0.746891	1	-0.0456026	0.0201791	0.307856	-1.11114
302937	ANKS3	ankyrin repeat and sterile alpha motif domain containing 3	0.31708	0.805667	-0.244248	0.253411	0.573882	-0.205636	0.377795	0.786149	-0.117967	0.0320873	0.236604	-0.168603	0.0986832	0.757016	-0.255271	0.754754	1	-0.028486	0.318867	0.834616	-0.157927	0.0338395	0.750579	-0.205532	0.121982	0.561018	-0.210734	0.514622	0.907341	-0.0658
687561	Anks4b	ankyrin repeat and sterile alpha motif domain containing 4B	0.247297	0.745579	-0.390053	0.979858	1	-0.00284793	0.0135041	0.204969	-0.432695	0.792683	1	0.000930085	0.607874	1	-0.148588	0.772257	1	-0.0313748	0.0728835	0.637979	-0.36024	0.966528	1	-3.85441e-05	0.338738	0.816652	-0.223573	0.943016	1	-0.0129576
362515	ANKS6	ankyrin repeat and sterile alpha motif domain containing 6	0.821328	1	-0.0552121	0.0587848	0.338265	-0.248262	0.288282	0.690462	-0.134719	0.311973	0.702619	-0.122801	0.648625	1	0.0509971	0.0989722	1	-0.158746	0.433041	0.908618	-0.104308	0.0117251	0.74747	-0.254336	0.846193	1	0.0211881	0.497188	0.893816	-0.0877752
363255	ANKZF1	ankyrin repeat and zinc finger domain containing 1	0.0203009	0.513528	-0.0662087	0.185252	0.506891	-0.14485	0.468231	0.847124	-0.0610026	0.344144	0.73607	-0.0468918	0.663897	1	-0.0250189	0.036794	1	-0.10406	0.0538863	0.618368	-0.1293	0.132198	0.780358	-0.0962953	0.681456	1	0.0344172	0.0953129	0.491994	-0.0988725
309135	ANO1	anoctamin 1, calcium activated chloride channel	0.945035	1	0.0106383	0.847107	1	-0.0406005	0.283272	0.68488	0.115947	0.861018	1	0.0147293	0.349143	0.926152	-0.103477	0.665853	1	-0.104798	0.792711	1	0.0250439	0.771917	1	0.0546103	0.882364	1	-0.0102491	0.562711	0.923051	-0.125234
299714	ANO4	anoctamin 4	0.11913	0.651381	0.337908	0.269093	0.591462	0.713447	0.922705	1	-0.00441641	0.125153	0.46445	0.375069	0.0085996	0.721469	0.495985	0.32464	1	0.294462	0.658155	1	0.111119	0.355268	0.959297	0.325774	0.0854667	0.495404	0.390645	0.0494592	0.404323	0.61085
315272	ANO6	anoctamin 6	0.984467	1	-0.0016619	0.0458183	0.316239	-0.165541	0.249405	0.650829	0.100228	0.386392	0.764011	-0.158612	0.238735	0.857365	-0.127084	0.890941	1	-0.0434994	0.378236	0.872403	0.0858674	0.532811	1	0.138625	0.365215	0.836812	-0.0964815	0.134756	0.543943	-0.371537
367318	ANO7	anoctamin 7	0.42265	0.83352	0.0121127	0.422649	0.708159	-0.294091	0.82957	1	0.00605634	0.0693723	0.356168	-0.36272	0.910431	1	0.00605634	0.98282	1	-0.0784174	0.403604	0.889613	0.131872	0.117103	0.762277	-0.334903	0.474993	0.922692	-0.115722	0.623582	0.957497	-0.106234
25379	ANP32A	acidic (leucine-rich) nuclear phosphoprotein 32 family, member A	0.062154	0.602963	-0.185214	0.570163	0.850848	0.582223	0.351348	0.758562	-0.117294	0.533915	0.882635	0.245294	0.197721	0.817027	-0.125063	0.54906	1	0.321818	0.265534	0.790706	-0.127866	0.972562	1	0.0312154	0.210337	0.667668	-0.138134	0.168275	0.592915	0.740045
170724	ANP32B	acidic (leucine-rich) nuclear phosphoprotein 32 family, member B	0.640346	1	-0.101476	0.918046	1	0.0200498	0.46653	0.845741	-0.105217	0.645641	0.96866	0.0557076	0.847237	1	-0.0320937	0.722347	1	-0.0216383	0.458214	0.926677	-0.104488	0.695232	1	-0.0711758	0.836351	1	-0.0427583	0.611521	0.951037	0.102582
361999	ANP32E	acidic (leucine-rich) nuclear phosphoprotein 32 family, member E	0.00412418	0.452792	0.473669	0.905679	1	0.0108507	0.00284516	0.11057	0.407331	0.231071	0.62413	0.25607	0.34494	0.921487	0.227297	0.254981	1	-0.227754	0.0137737	0.612323	0.401104	0.179717	0.838773	0.318039	0.130007	0.564287	0.284108	0.202802	0.635458	-0.29775
81641	ANPEP	alanyl (membrane) aminopeptidase	0.595198	0.965446	-0.0948149	0.0248104	0.284414	-0.461091	0.881794	1	0.00859188	0.841721	1	-0.0357348	0.15349	0.794983	-0.106772	0.00899708	1	-0.494471	0.641154	1	-0.0450476	0.530902	1	-0.132421	0.418703	0.878466	-0.082494	0.0171876	0.294768	-0.505405
362393	ANTXR1	anthrax toxin receptor 1	0.306027	0.795793	-0.248788	0.000620747	0.219082	-0.680141	0.45665	0.8363	-0.14107	0.279054	0.678607	-0.394465	0.255273	0.857365	-0.137522	0.513839	1	-0.400062	0.342333	0.851968	-0.159044	0.95726	1	0.0046121	0.284674	0.758931	-0.182608	0.0285713	0.342599	-0.949596
25380	ANXA1	annexin A1	0.419811	0.83352	-0.324533	0.0196292	0.268549	-0.798336	0.757525	1	-0.0957875	0.222111	0.610192	-0.333834	0.0941272	0.750041	-0.398944	0.0517587	1	-0.568444	0.477082	0.939706	-0.190084	0.380764	0.972321	-0.27404	0.227419	0.692021	-0.29936	0.00205168	0.163008	-0.825055
498622	ANXA10	annexin A10	0.22872	0.733119	-0.237652	0.0195602	0.268549	-1.26338	0.0941511	0.447775	-0.177783	0.000288464	0.0194942	-1.07883	0.13172	0.784236	-0.184976	0.299514	1	-0.452233	0.107296	0.668731	-0.173007	0.0519655	0.751369	-0.799684	0.0707334	0.462592	-0.185566	0.0185699	0.298387	-0.974047
290527	ANXA11	annexin A11	0.17499	0.698023	0.271279	0.0161378	0.258296	0.406837	0.0638915	0.382777	0.244553	0.0049951	0.0844753	0.459923	0.440465	0.962785	0.103674	0.995427	1	0.00618819	0.0961227	0.659425	0.234375	0.26388	0.901641	0.237175	0.269326	0.741572	0.15298	0.107631	0.496338	0.325032
362915	ANXA13	annexin A13	0.223457	0.728091	0.326047	0.945508	1	0.0156277	0.0348716	0.300235	0.29928	0.469554	0.828902	0.113225	0.666445	1	0.0698382	0.519157	1	-0.122868	0.0545523	0.618368	0.319428	0.307501	0.933582	-0.237523	0.398867	0.860073	0.129657	0.264795	0.70337	0.249936
56611	ANXA2	annexin A2	0.791796	1	-0.0832864	0.296331	0.621955	0.481918	0.774344	1	0.0360309	0.0578962	0.324868	0.565295	0.397939	0.959676	-0.169015	0.890423	1	0.00981048	0.990481	1	0.00572642	0.466192	1	0.313958	0.560148	0.959015	-0.133341	0.2687	0.706552	0.359663
25291	ANXA3	annexin A3	0.704572	1	-0.116465	0.0150973	0.255846	2.48957	0.780584	1	-0.0550676	9.79336e-07	0.00208476	2.58004	0.568314	1	-0.148414	0.798214	1	0.33935	0.55133	0.952084	-0.136392	0.0262693	0.74747	2.01924	0.774009	1	-0.0478998	0.130045	0.537248	1.44346
79124	ANXA4	annexin A4	0.19342	0.702938	-0.246833	0.470896	0.752651	0.0321856	0.30712	0.710344	-0.137228	0.385371	0.764011	0.069653	0.0800258	0.7404	-0.231486	0.736512	1	-0.0253912	0.342338	0.851968	-0.124437	0.438391	0.991675	0.0526062	0.0299498	0.353461	-0.2453	0.852702	1	-0.00566668
25673	ANXA5	annexin A5	0.821003	1	-0.0362403	0.601076	0.879409	-0.138182	0.52067	0.887521	0.0489253	0.767648	1	-0.121904	0.304334	0.895217	-0.136294	0.505267	1	-0.105966	0.940783	1	0.0218809	0.256485	0.896645	-0.199053	0.640372	1	-0.087244	0.957895	1	-0.0150858
79125	ANXA6	annexin A6	0.670955	1	0.0382041	0.229864	0.54803	-0.271441	0.893517	1	-0.0148733	0.23805	0.632648	-0.214437	0.495449	0.98714	0.0540453	0.395084	1	-0.142972	0.723992	1	-0.0286935	0.0679902	0.752639	-0.286958	0.353349	0.830849	0.0799549	0.612445	0.951898	-0.103619
155423	ANXA7	annexin A7	0.441171	0.849076	0.146251	0.0148721	0.255281	0.373817	0.313684	0.717149	0.0948609	0.00848227	0.113474	0.348492	0.441742	0.962785	0.0936259	0.742474	1	0.099699	0.626018	1	0.0650302	0.399645	0.979947	0.166529	0.155739	0.590435	0.144049	0.0213711	0.31321	0.356685
306283	ANXA8L2 (includes others)	annexin A8-like 2	0.432919	0.844121	-0.447779	0.654251	0.928336	-0.105615	0.922713	1	-0.171365	0.205367	0.593168	0.35617	0.188775	0.817027	-0.574452	0.0691847	1	-0.481901	0.485179	0.944405	-0.318778	0.624121	1	0.15164	0.440657	0.894125	-0.377606	0.340072	0.773515	-0.299165
498757	AOAH	acyloxyacyl hydrolase (neutrophil)	0.577579	0.952933	0.102162	0.567767	0.848549	0.395669	0.378293	0.786802	0.132873	0.558761	0.902476	0.322196	0.806994	1	-0.0476022	0.466571	1	0.229503	0.708616	1	0.0608927	0.337989	0.947882	0.369988	0.770419	1	0.0696931	0.615766	0.953838	0.209581
353257	Aoc2-ps1	amine oxidase, copper containing 2 (retina-specific), pseudogene 1	0.865189	1	0.0227678	0.672596	0.943574	-0.144829	0.26296	0.659339	-0.170898	0.503528	0.855967	-0.141618	0.185708	0.817027	0.210833	0.978097	1	-0.00453473	0.424602	0.902855	-0.146677	0.892202	1	-0.0458501	0.311173	0.788326	0.182757	0.562821	0.923051	-0.147696
29473	AOC3	amine oxidase, copper containing 3 (vascular adhesion protein 1)	0.780615	1	-0.0585241	0.0566429	0.333551	-0.754182	0.73989	1	-0.071569	0.00867951	0.115478	-0.564917	0.700006	1	-0.0605936	0.182645	1	-0.359535	0.80463	1	-0.0357644	0.0443073	0.750579	-0.506907	0.606346	0.990885	-0.0668139	0.0216599	0.314092	-0.555425
54349	AOX1	aldehyde oxidase 1	0.922688	1	-0.0267496	0.0462074	0.316239	-0.726754	0.946952	1	-0.0627149	0.00327882	0.0659205	-0.972696	0.870489	1	-0.0641223	0.661478	1	0.0878705	0.801952	1	-0.0546361	0.0436893	0.750579	-0.877615	0.995894	1	-0.0143926	0.728187	1	-0.144082
493909	Aox3	aldehyde oxidase 3	1	1	0	0.422648	0.708159	0.26012	1	1	0	0.981397	1	-0.0303655	1	1	0	0.0974997	1	0.290486	1	1	0	0.498711	1	0.127511	1	1	0	0.28427	0.717775	0.219316
316421	Aox3l1	aldehyde oxidase 3-like 1	0.0736893	0.615352	-0.581586	0.205098	0.523189	0.858014	0.114739	0.483532	-0.362236	0.020451	0.187046	0.772729	0.16802	0.80882	-0.358585	0.553959	1	0.129945	0.119449	0.680364	-0.41205	0.0702984	0.752639	0.687631	0.108312	0.534887	-0.409809	0.251348	0.692519	0.471274
316424	Aox4	aldehyde oxidase 4	0.422647	0.83352	-0.179639	1	1	0	0.45421	0.834589	-0.0898194	1	1	0	0.25281	0.857365	-0.0898194	1	1	0	0.550415	0.952018	-0.0598796	1	1	0	0.129883	0.564287	-0.179639	1	1	0
362037	AP1AR	adaptor-related protein complex 1 associated regulatory protein	0.0698648	0.612574	-0.147624	0.0648674	0.346455	0.17418	0.292649	0.694898	-0.0906516	0.410017	0.777827	0.150361	0.291171	0.886495	-0.119756	0.597301	1	0.0612494	0.765513	1	-0.0432041	0.100009	0.752639	0.231922	0.0354182	0.371233	-0.174556	0.958995	1	0.0127944
29663	AP1B1	adaptor-related protein complex 1, beta 1 subunit	0.142629	0.666728	0.192978	0.364381	0.694183	0.0953404	0.263957	0.660436	0.1038	0.168084	0.536745	0.0805627	0.048292	0.721469	0.132788	0.714885	1	0.0104032	0.195855	0.738649	0.106718	0.732251	1	0.0216009	0.0292931	0.351558	0.165122	0.105895	0.494263	0.104061
171494	AP1G1	adaptor-related protein complex 1, gamma 1 subunit	0.442621	0.849778	0.0814456	0.101584	0.403069	0.397328	0.5681	0.921755	-0.105728	0.734742	1	0.215796	0.184038	0.817027	0.188279	0.490603	1	0.205307	0.746861	1	-0.0691447	0.154578	0.819121	0.583694	0.258638	0.728207	0.178108	0.826466	1	-0.0459993
306332	AP1M1	adaptor-related protein complex 1, mu 1 subunit	0.227236	0.731122	-0.132576	0.683885	0.953645	-0.0271993	0.662787	0.995086	-0.0301	0.704027	1	0.0505534	0.111318	0.765741	-0.164474	0.500628	1	-0.0630944	0.562903	0.95994	-0.0597709	0.471213	1	-0.0758923	0.121931	0.561018	-0.137663	0.69499	1	0.0445126
367038	AP1M2	adaptor-related protein complex 1, mu 2 subunit	0.307583	0.796989	-0.197448	0.154627	0.474453	-0.226299	0.551527	0.909157	-0.111227	0.891397	1	-0.0558577	0.174254	0.812577	-0.193826	0.0544472	1	-0.228596	0.326375	0.838337	-0.127011	0.253356	0.894679	-0.163338	0.27057	0.743194	-0.172121	0.305662	0.738252	-0.157779
360785	AP1S1	adaptor-related protein complex 1, sigma 1 subunit	0.553284	0.935218	0.0871872	0.0337023	0.300506	0.329387	0.304083	0.707863	0.146164	0.0913514	0.405875	0.406348	0.820837	1	-0.0550741	0.805541	1	-0.0161056	0.405829	0.891087	0.132142	0.678358	1	0.145171	0.984404	1	-0.014592	0.266996	0.704514	0.314297
302671	AP1S2	adaptor-related protein complex 1, sigma 2 subunit	0.106879	0.64176	-0.461508	0.161219	0.483381	-0.815578	0.00784544	0.164072	-0.419219	0.00233834	0.0549267	-0.96888	0.475914	0.97501	-0.163423	0.926341	1	0.0596005	0.0775197	0.646503	-0.363604	0.128813	0.776271	-0.620914	0.117142	0.551432	-0.292117	0.235157	0.675686	-0.497757
367304	Ap1s3	adaptor-related protein complex 1, sigma 3 subunit	0.697979	1	0.0449299	0.930775	1	-0.019628	0.772687	1	-0.00301477	0.634744	0.961117	-0.0610163	0.34202	0.920227	0.0943414	0.742207	1	0.0714424	0.457171	0.925986	0.0647452	0.784143	1	0.0428443	0.961701	1	0.010627	0.662168	0.98363	-0.058997
308578	AP2A1	adaptor-related protein complex 2, alpha 1 subunit	0.388494	0.83352	-0.154256	0.374567	0.704926	-0.131775	0.774051	1	-0.0337557	0.12003	0.456644	-0.134982	0.115401	0.773398	-0.21788	0.898304	1	-0.0456835	0.744222	1	-0.0546616	0.412513	0.983094	-0.0861753	0.140465	0.57219	-0.183473	0.335461	0.768579	-0.105821
81637	AP2A2	adaptor-related protein complex 2, alpha 2 subunit	0.0806816	0.615693	0.160054	0.0420507	0.314175	0.802833	0.0752564	0.405703	0.111602	0.000346075	0.0211497	0.681175	0.185513	0.817027	0.117058	0.48675	1	0.186595	0.160997	0.700136	0.105054	0.0517375	0.751369	0.528246	0.0546118	0.426037	0.13122	0.036275	0.368641	0.563844
140670	AP2B1	adaptor-related protein complex 2, beta 1 subunit	0.991786	1	0.00130004	0.392962	0.708159	1.37238	0.901753	1	-0.000551083	0.300913	0.693557	0.751555	0.921981	1	-0.0350128	0.313811	1	0.608207	0.86315	1	0.00345965	0.448019	0.998865	0.58022	0.883951	1	-0.0140142	0.109686	0.499604	1.24542
116563	AP2M1	adaptor-related protein complex 2, mu 1 subunit	0.655055	1	-0.0500207	0.212095	0.52884	0.127967	0.916509	1	0.0172849	0.373212	0.76341	0.143366	0.524835	1	-0.113483	0.938551	1	0.028674	0.986704	1	0.00336641	0.913611	1	-0.018059	0.566447	0.963985	-0.085453	0.225421	0.664779	0.203373
65046	AP2S1	adaptor-related protein complex 2, sigma 1 subunit	0.444559	0.851003	0.265144	0.0411516	0.313217	0.576922	0.079917	0.417097	0.402859	0.0193798	0.181124	0.924977	0.88139	1	0.000322085	0.425214	1	-0.221913	0.154595	0.69536	0.34947	0.656396	1	0.32703	0.805958	1	0.0500684	0.322681	0.756612	0.484247
309969	AP3B1	adaptor-related protein complex 3, beta 1 subunit	0.979618	1	0.00326733	0.286585	0.61106	0.120319	0.958779	1	-0.0189923	0.797653	1	0.00353841	0.908856	1	0.00285587	0.23712	1	0.15111	0.988502	1	-0.00791456	0.293376	0.920958	0.156569	0.935404	1	0.0058031	0.975696	1	0.0152995
314633	AP3D1	adaptor-related protein complex 3, delta 1 subunit	0.800573	1	-0.0405375	0.585491	0.86448	-0.0522779	0.325054	0.731574	-0.0840013	0.120221	0.456644	-0.107004	0.687741	1	0.0151024	0.444841	1	0.0231475	0.335099	0.844443	-0.0960629	0.584713	1	-0.0607887	0.76201	1	0.0325591	0.77984	1	-0.0194413
171126	AP3M1	adaptor-related protein complex 3, mu 1 subunit	0.0960869	0.627534	-0.258727	0.24571	0.566001	0.154523	0.00526385	0.138982	-0.239251	0.155295	0.517345	0.0993541	0.215054	0.836479	-0.13416	0.490314	1	0.0585459	0.0552597	0.618368	-0.19255	0.0714462	0.752639	0.149432	0.0647661	0.451592	-0.190647	0.538427	0.919146	0.0577244
140667	AP3M2	adaptor-related protein complex 3, mu 2 subunit	0.0343105	0.552074	-0.28018	0.0452613	0.316239	-0.509291	0.0048215	0.133296	-0.388437	0.0406258	0.269645	-0.461873	0.774226	1	0.0153199	0.917114	1	-0.112783	0.0582244	0.619863	-0.331666	0.731389	1	-0.142935	0.606873	0.99109	-0.0728868	0.0415858	0.384959	-0.557907
302290	Ap3s1	adaptor-related protein complex 3, sigma 1 subunit	0.170517	0.693717	-0.0684207	0.071852	0.357163	0.375851	0.132812	0.51304	-0.112572	0.125556	0.465135	0.241574	0.7606	1	0.0317529	0.517165	1	0.198839	0.483819	0.943591	-0.0616607	0.443518	0.994877	0.18457	0.692269	1	-0.0336999	0.0929733	0.488383	0.338086
683402	AP3S2	adaptor-related protein complex 3, sigma 2 subunit	0.13559	0.661782	-0.154112	0.300258	0.626679	0.0692528	0.123673	0.49929	-0.124115	0.805696	1	0.00967374	0.385645	0.952782	-0.100732	0.96763	1	0.0552252	0.360852	0.864035	-0.0829043	0.458039	1	-0.189658	0.102592	0.525248	-0.146157	0.279698	0.71368	0.280543
310746	AP4B1	adaptor-related protein complex 4, beta 1 subunit	0.911548	1	-0.0110925	0.969163	1	0.00401578	0.144031	0.528738	-0.136008	0.867156	1	0.0138657	0.195945	0.817027	0.12882	0.925038	1	-0.00700879	0.345758	0.853856	-0.0943099	0.978688	1	-0.00635074	0.435473	0.89205	0.0808211	0.913625	1	0.0126521
311404	AP4E1	adaptor-related protein complex 4, epsilon 1 subunit	0.590242	0.962019	0.112089	0.109383	0.412966	0.202984	0.598393	0.943839	-0.105226	0.961819	1	0.0899804	0.228273	0.847687	0.280026	0.608938	1	0.167806	0.82036	1	-0.0746122	0.322033	0.941769	0.465043	0.334787	0.813788	0.244968	0.648539	0.973895	-0.17613
304344	AP4M1	adaptor-related protein complex 4, mu 1 subunit	0.0355674	0.555306	-0.314039	0.0562039	0.333038	-0.151815	0.073657	0.402689	-0.232304	0.409678	0.777275	-0.122897	0.137888	0.785653	-0.2059	0.976191	1	-0.0448774	0.200926	0.740929	-0.186433	0.70415	1	0.0651403	0.0177967	0.298044	-0.273674	0.192902	0.622655	-0.27288
366618	AP4S1	adaptor-related protein complex 4, sigma 1 subunit	0.0851591	0.623827	0.0540029	0.206365	0.524005	0.206365	0.26758	0.664317	0.0819608	0.42786	0.795091	0.162991	0.792891	1	-0.00436373	0.939419	1	0.112295	0.45088	0.921118	0.0701919	0.683306	1	-0.0827026	0.891532	1	0.00967666	0.152548	0.571032	0.38083
305861	AP5M1	adaptor-related protein complex 5, mu 1 subunit	0.474424	0.875252	-0.0690231	0.225995	0.543831	0.226462	0.196801	0.595322	-0.140319	0.617338	0.947719	0.155768	0.644825	1	0.0575218	0.674645	1	0.125701	0.628421	1	-0.0681615	0.335315	0.946835	0.269701	0.747308	1	-0.0284606	0.94494	1	0.0505834
499893	AP5S1	adaptor-related protein complex 5, sigma 1 subunit	0.151215	0.671842	-0.470468	0.368135	0.698241	-0.367567	0.434408	0.834589	-0.191876	0.161143	0.526572	-0.298648	0.0374913	0.721469	-0.504245	0.73001	1	-0.177845	0.493525	0.950163	-0.180201	0.630592	1	-0.14535	0.0130919	0.275795	-0.522308	0.138445	0.5492	-0.381048
78963	APAF1	apoptotic peptidase activating factor 1	0.334131	0.821579	-0.0893705	0.222575	0.539513	0.14521	0.523438	0.889281	-0.108267	0.753187	1	0.139345	0.747624	1	-0.0296441	0.799626	1	0.0303776	0.283597	0.806965	-0.139835	0.234615	0.887649	0.341843	0.994651	1	0.00449376	0.586906	0.933819	-0.140059
83589	APBA1	amyloid beta (A4) precursor protein-binding, family A, member 1	0.236562	0.738612	-0.446656	0.150384	0.468472	-0.309429	0.550999	0.908727	-0.132002	0.443381	0.806794	-0.338321	0.0908113	0.747963	-0.493361	0.940474	1	-0.0754001	0.896277	1	-0.0728318	0.604726	1	0.24386	0.0173573	0.297378	-0.582278	0.183843	0.612924	-0.691196
83610	APBA2	amyloid beta (A4) precursor protein-binding, family A, member 2	0.0652175	0.603944	-0.244355	0.260626	0.582016	-0.386103	0.182463	0.580378	-0.225242	0.196954	0.580281	-0.248211	0.440574	0.962785	-0.113999	0.173242	1	-0.260446	0.379529	0.873312	-0.15337	0.0946122	0.752639	-0.294616	0.168354	0.608081	-0.204065	0.190607	0.619993	-0.261038
83611	APBA3	amyloid beta (A4) precursor protein-binding, family A, member 3	0.246855	0.744983	0.130575	0.226417	0.544038	0.153391	0.16625	0.55597	0.162839	0.0634645	0.340126	0.305995	0.925671	1	-0.00470712	0.405309	1	-0.155902	0.530935	0.952018	0.101567	0.988872	1	0.0048329	0.479602	0.926243	0.0817192	0.299234	0.731863	0.198589
29722	APBB1	amyloid beta (A4) precursor protein-binding, family B, member 1 (Fe65)	0.454469	0.858391	-0.10723	0.0602623	0.34069	-0.267698	0.717339	1	-0.0422237	0.0757956	0.369809	-0.217038	0.241759	0.857365	-0.138698	0.404405	1	-0.117954	0.697533	1	-0.0422616	0.00962616	0.74747	-0.289752	0.215995	0.675969	-0.125275	0.582966	0.9308	-0.0896102
307171	APBB1IP	amyloid beta (A4) precursor protein-binding, family B, member 1 interacting protein	0.462714	0.864702	0.155296	0.182761	0.50555	-0.252994	0.50364	0.875247	0.129263	0.199914	0.584771	-0.177915	0.505269	0.994767	0.0937747	0.719157	1	-0.0753191	0.10078	0.662582	0.230759	0.845866	1	-0.0209492	0.910288	1	-0.00111685	0.0884624	0.479315	-0.316456
117026	APBB3	amyloid beta (A4) precursor protein-binding, family B, member 3	0.918124	1	0.0254901	0.00438563	0.235112	-0.704405	0.898443	1	-0.0390961	0.0012528	0.0387521	-0.566405	0.74306	1	0.0183904	0.357148	1	-0.25487	0.577788	0.970355	-0.112307	0.0671166	0.752639	-0.440986	0.430881	0.888811	0.130895	0.0145457	0.281081	-0.537177
24205	APC	adenomatous polyposis coli	0.569103	0.947463	0.149785	0.106534	0.409449	0.191572	0.677127	1	0.0900743	0.778895	1	-0.0219073	0.568616	1	0.141164	0.441674	1	0.251117	0.454756	0.923736	0.1399	0.25661	0.896761	0.486373	0.76657	1	0.0869645	0.568253	0.923051	-0.218397
299611	APC2	adenomatosis polyposis coli 2	0.844791	1	0.0898014	0.227606	0.545933	-0.341852	0.503022	0.874896	-0.127976	0.0168137	0.167671	-0.349257	0.307183	0.896791	0.375448	0.917787	1	-0.0216372	0.576089	0.96897	-0.215068	0.369861	0.968068	-0.19641	0.352248	0.829406	0.387361	0.17937	0.608136	-0.269074
29339	APCS	amyloid P component, serum	0.594116	0.964243	0.139393	0.164298	0.486608	-0.583872	0.720462	1	-0.0674682	0.12457	0.464016	-0.484427	0.28778	0.882108	0.321344	0.36711	1	-0.305076	0.598847	0.984505	-0.128566	0.144545	0.803054	-0.435858	0.203285	0.65879	0.352585	0.20302	0.635654	-0.411182
24206	APEH	N-acylaminoacyl-peptide hydrolase	0.451615	0.856454	-0.130647	0.287586	0.612263	0.109218	0.663489	0.995702	-0.062449	0.462719	0.822558	0.0590619	0.27144	0.86647	-0.154917	0.77214	1	0.0347817	0.362783	0.864035	-0.111392	0.661513	1	-0.0577588	0.496972	0.941507	-0.0917104	0.0842212	0.474422	0.198258
79116	APEX1	APEX nuclease (multifunctional DNA repair enzyme) 1	0.0144321	0.508126	-0.424008	0.0133663	0.252542	-0.245569	0.357525	0.764041	-0.169137	0.841409	1	-0.0519298	0.015077	0.721469	-0.410517	0.130511	1	-0.235348	0.252584	0.780389	-0.225436	0.382643	0.973626	-0.157491	0.0237267	0.327115	-0.39179	0.321552	0.75625	-0.183838
365872	APH1A	anterior pharynx defective 1 homolog A (C. elegans)	0.710848	1	0.0401041	0.583442	0.862277	0.024487	0.108432	0.472398	0.17295	0.670616	0.986063	0.0239398	0.283349	0.876077	-0.12081	0.851091	1	-0.000600753	0.398459	0.887015	0.113037	0.379163	0.971047	-0.0992732	0.704751	1	-0.0555526	0.244771	0.685394	0.13154
300802	APH1B	anterior pharynx defective 1 homolog B (C. elegans)	0.252491	0.748631	0.524572	0.327804	0.658785	1.6728	0.116683	0.485865	0.388333	0.287646	0.688974	0.97122	0.15388	0.794983	0.379936	0.397123	1	0.754294	0.118968	0.680364	0.389311	0.747163	1	0.332817	0.0997138	0.521253	0.391351	0.0536797	0.417524	1.91515
362170	API5	apoptosis inhibitor 5	0.925657	1	0.00360585	0.425556	0.711041	0.104663	0.232885	0.639888	-0.0965616	0.950264	1	0.0362948	0.212033	0.834562	0.0985264	0.468665	1	0.0847595	0.911687	1	-0.0260904	0.135729	0.7876	0.209284	0.869228	1	0.0303512	0.586035	0.933163	-0.0642689
295961	Apip	APAF1 interacting protein	0.20922	0.715809	-0.363464	0.151212	0.469489	-0.104732	0.0180012	0.229289	-0.317515	0.52376	0.872848	-0.0912347	0.414548	0.962785	-0.126506	0.571405	1	-0.0266403	0.085781	0.650004	-0.28109	0.124684	0.772863	-0.153344	0.181615	0.62575	-0.230381	0.864052	1	0.00931985
100534597	Apitd1	apoptosis-inducing, TAF9-like domain 1	0.423716	0.834168	-0.186412	0.069853	0.353913	-0.732381	0.54052	0.901359	-0.0842635	0.411235	0.778708	-0.452095	0.200986	0.820757	-0.175626	0.257735	1	-0.415408	0.53114	0.952018	-0.0836374	0.0532351	0.751369	-0.810779	0.154686	0.589593	-0.189405	0.724881	1	-0.210769
500247	APLF	aprataxin and PNKP like factor	0.124324	0.656148	0.22177	0.0983872	0.398453	-0.160748	0.495247	0.869192	0.104052	0.322368	0.713224	0.158546	0.241717	0.857365	0.215953	0.0388013	1	-0.350756	0.848917	1	0.05097	0.968219	1	0.0196939	0.0604191	0.441036	0.277468	0.282355	0.716618	-0.244512
58812	APLN	apelin	0.79778	1	-0.08394	0.86743	1	-0.0277487	0.949194	1	0.0182838	0.474743	0.83349	0.193042	0.519432	1	-0.0425926	0.38464	1	-0.178952	0.974021	1	0.0157228	0.61539	1	0.145683	0.45964	0.911359	-0.107766	0.501635	0.896887	-0.168735
83518	APLNR	apelin receptor	0.292414	0.785823	0.224813	0.90418	1	-0.0567513	0.853214	1	0.00251103	0.320147	0.711789	0.233808	0.0564883	0.728322	0.34302	0.222772	1	-0.379956	0.642125	1	0.104901	0.957804	1	0.0161592	0.267427	0.739691	0.23509	0.783046	1	-0.121626
502317	APLP1	amyloid beta (A4) precursor-like protein 1	0.228068	0.732139	0.238506	0.161498	0.483381	-0.416728	0.145749	0.530728	0.251324	0.324119	0.714503	-0.244982	0.794902	1	0.0403012	0.199327	1	-0.290589	0.254905	0.783247	0.228697	0.132461	0.781082	-0.330664	0.490413	0.935349	0.107017	0.293487	0.726875	-0.264588
64312	Aplp2	amyloid beta (A4) precursor-like protein 2	0.108531	0.644226	0.238055	0.718409	0.984193	-0.0214986	0.0797452	0.416583	0.145067	0.0775795	0.373339	-0.0821029	0.189981	0.817027	0.148388	0.218372	1	0.0699681	0.239202	0.770787	0.12711	0.96218	1	0.00563401	0.027029	0.338865	0.208764	0.618771	0.954791	-0.0311776
366227	APMAP	adipocyte plasma membrane associated protein	0.933434	1	-0.00607163	0.871478	1	0.0269814	0.884658	1	0.00243453	0.655979	0.976382	-0.0570004	0.728183	1	-0.0319758	0.445942	1	0.0416714	0.647402	1	0.0140802	0.877108	1	-0.0312534	0.503126	0.945913	-0.029999	0.609872	0.950109	0.053125
25081	Apoa1	apolipoprotein A-I	0.712931	1	0.107194	0.581777	0.860951	0.177761	0.439069	0.834589	-0.202476	0.538954	0.886886	0.156275	0.175486	0.813115	0.392103	0.910448	1	0.0815433	0.481779	0.942538	-0.176614	0.931579	1	0.0377178	0.197997	0.650729	0.347017	0.466901	0.872109	0.219315
295229	APOA1BP	apolipoprotein A-I binding protein	0.768883	1	0.090701	0.564882	0.846156	-0.0563239	0.260213	0.65704	0.235447	0.282003	0.681884	0.306059	0.595326	1	-0.108558	0.204178	1	-0.374106	0.398666	0.887015	0.197222	0.892017	1	-0.0141216	0.828449	1	-0.0642247	0.950351	1	-0.0648846
25649	APOA2	apolipoprotein A-II	1	1	0	1	1	0	1	1	0	0.304546	0.693557	0.143981	1	1	0	0.304546	1	-0.143981	1	1	0	0.572368	1	-0.0959872	1	1	0	0.572368	0.923051	0.0959872
25080	APOA4	apolipoprotein A-IV	1	1	0	0.422649	0.708159	0.177817	1	1	0	0.213666	0.599238	0.177817	1	1	0	0.395777	1	0.0889086	1	1	0	0.106476	0.752639	0.177817	1	1	0	0.536248	0.917174	0.0889086
140638	APOA5	apolipoprotein A-V	0.929374	1	-0.0274917	0.183663	0.50555	0.362857	0.627962	0.967363	0.189381	0.0475997	0.29547	0.445429	0.537963	1	-0.149772	0.903511	1	0.00633655	0.568003	0.963076	0.192005	0.373171	0.968698	0.246129	0.472827	0.920467	-0.206293	0.300696	0.733022	0.267316
54225	APOB	apolipoprotein B (including Ag(x) antigen)	0.814936	1	-0.0528605	0.134778	0.446986	-0.798894	0.472765	0.851708	0.0917695	0.365227	0.756116	-0.430265	0.278434	0.872975	-0.228409	0.102806	1	-0.602138	0.561633	0.958964	0.109367	0.571302	1	-0.22756	0.339422	0.817242	-0.207774	0.00427689	0.192094	-0.915468
25383	APOBEC1	apolipoprotein B mRNA editing enzyme, catalytic polypeptide 1	0.769735	1	0.0359811	0.675937	0.947113	-0.213924	0.556406	0.913663	-0.122112	0.75348	1	-0.163048	0.401711	0.961035	0.17633	0.564064	1	-0.209328	0.804666	1	0.0443032	0.988145	1	-0.0116834	0.996917	1	0.00975078	0.307423	0.740301	-0.326366
301226	APOBEC2	apolipoprotein B mRNA editing enzyme, catalytic polypeptide-like 2	0.54502	0.930309	-0.0544607	0.497336	0.779606	-0.202072	0.924219	1	-0.0129198	0.115666	0.448786	-0.253678	0.836357	1	-0.0399344	0.77277	1	0.0628169	0.703293	1	0.117828	0.645812	1	-0.106965	0.472643	0.920318	-0.189907	0.379824	0.809056	-0.158727
315137	APOBEC3B	apolipoprotein B mRNA editing enzyme, catalytic polypeptide-like 3B	0.651866	1	-0.133339	0.991902	1	-0.00217371	0.872595	1	-0.0389756	0.165272	0.532288	0.236296	0.555375	1	-0.143496	0.161182	1	-0.273035	0.367698	0.86612	-0.199347	0.586288	1	-0.122604	0.935372	1	0.00518436	0.595565	0.940266	0.108184
498251	APOBEC4	apolipoprotein B mRNA editing enzyme, catalytic polypeptide-like 4 (putative)	0.250962	0.748427	0.267597	0.902344	1	0.0262192	0.45229	0.834589	0.188956	0.323964	0.714466	0.0926598	0.608094	1	0.160059	0.407939	1	-0.123486	0.221204	0.757251	0.34466	0.803435	1	0.0507746	0.843361	1	0.0392751	0.938994	1	-0.0348308
499264	APOBR	apolipoprotein B receptor	0.591813	0.96296	-0.299026	0.704009	0.971106	-0.115861	0.728847	1	-0.0745383	0.893979	1	0.0894421	0.395046	0.959171	-0.324742	0.504092	1	-0.202568	0.66307	1	-0.141506	0.607945	1	-0.144494	0.41151	0.871428	-0.290614	0.953718	1	-0.00907554
25292	APOC1	apolipoprotein C-I	0.422647	0.83352	0.191751	0.0243565	0.284129	-0.595977	0.790951	1	0.0115791	0.279251	0.678876	-0.252101	0.0919163	0.749239	0.180172	0.0257609	1	-0.429646	0.372547	0.868437	0.135554	0.0996889	0.752639	-0.386134	0.357365	0.834001	0.120115	0.0416739	0.385082	-0.437091
292697	APOC2	apolipoprotein C-II	1	1	0	1	1	0	1	1	0	1	1	0	1	1	0	1	1	0	1	1	0	1	1	0	1	1	0	1	1	0
24207	Apoc3	apolipoprotein C-III	0.857989	1	-0.059268	1	1	0	0.940026	1	0.0577601	1	1	0	0.635482	1	-0.146662	1	1	0	0.70848	1	0.0577601	1	1	0	0.418601	0.878361	-0.146662	1	1	0
680551	APOC4	apolipoprotein C-IV	1	1	0	0.422647	0.708159	-0.186123	1	1	0	0.395772	0.764011	-0.0930616	1	1	0	0.304546	1	-0.0930616	1	1	0	0.572368	1	-0.0620411	1	1	0	0.101841	0.494263	-0.186123
25239	APOD	apolipoprotein D	0.328332	0.815442	-0.0869301	0.183709	0.50555	-0.365999	0.712779	1	0.0190215	0.972147	1	0.00355711	0.0937342	0.750041	-0.136509	0.291142	1	-0.453286	0.970792	1	-0.00442272	0.699059	1	-0.121338	0.209973	0.667011	-0.12167	0.406024	0.824221	-0.394571
25728	APOE	apolipoprotein E	0.722848	1	-0.096359	0.111894	0.41596	-0.932762	0.483659	0.858795	0.11696	0.114951	0.447429	-0.442949	0.186077	0.817027	-0.250735	0.106365	1	-0.517978	0.856655	1	-0.0133265	0.0563377	0.751369	-0.636984	0.660447	1	-0.127624	0.0841941	0.474422	-0.616087
500761	APOF	apolipoprotein F	0.422647	0.83352	-0.161532	0.422648	0.708159	0.26012	0.45421	0.834589	-0.0807662	0.304546	0.693557	0.13006	0.19768	0.817027	-0.161532	0.395775	1	0.13006	0.536795	0.952018	-0.0807662	0.101841	0.752639	0.26012	0.135389	0.564287	-0.161532	0.572368	0.923051	0.0867067
287774	APOH	apolipoprotein H (beta-2-glycoprotein I)	0.319146	0.807587	-0.403252	0.999607	1	0.000140464	0.716345	1	-0.117892	0.9973	1	-0.029881	0.0539044	0.726854	-0.440146	0.996364	1	-0.0535488	0.435717	0.910949	-0.186076	0.894224	1	-0.023541	0.103733	0.526101	-0.403189	0.893196	1	-0.00412845
315108	Apol3	apolipoprotein L, 3	0.136514	0.661782	-0.977555	0.0851795	0.380712	-0.530196	0.193543	0.595322	-0.674089	0.125148	0.46445	-0.387472	0.0724249	0.740333	-0.747458	0.490326	1	-0.252228	0.0569379	0.618368	-0.79663	0.294902	0.923194	-0.307463	0.147354	0.582528	-0.654773	0.165811	0.590138	-0.435966
503164	Apol9a	apolipoprotein L 9a	0.558151	0.938982	-0.691741	0.239702	0.559578	-1.52246	0.555963	0.913288	-0.386426	0.149793	0.50806	-0.883402	0.344681	0.921487	-0.704753	0.253487	1	-0.946043	0.548042	0.952018	-0.407272	0.433744	0.989506	-0.656022	0.310596	0.788326	-0.648195	0.0228021	0.317689	-1.47625
444983	APOLD1	apolipoprotein L domain containing 1	0.210072	0.71617	0.516563	0.845225	1	-0.0281068	0.0264461	0.270985	0.642953	0.18112	0.557872	0.300498	0.877346	1	0.124132	0.131254	1	-0.307465	0.270205	0.795158	0.401511	0.614007	1	0.147912	0.319476	0.797861	0.370747	0.503106	0.898668	-0.178341
55939	APOM	apolipoprotein M	0.741643	1	0.0554199	0.55481	0.835846	0.119951	0.82411	1	-0.0662223	0.706129	1	0.0792469	0.45681	0.964575	0.0916599	0.690292	1	0.117498	0.471767	0.934333	-0.10923	0.568136	1	-0.0839654	0.18301	0.627097	0.173129	0.130994	0.538849	0.269498
304603	Apon	apolipoprotein N	1	1	0	1	1	0	1	1	0	1	1	0	1	1	0	1	1	0	1	1	0	1	1	0	1	1	0	1	1	0
363474	APOO	apolipoprotein O	0.124493	0.656148	-0.217155	0.112609	0.417267	0.152478	0.0375145	0.310572	-0.160621	0.310847	0.701296	0.119337	0.137422	0.785653	-0.111274	0.967034	1	0.0405434	0.031473	0.612323	-0.169862	0.885938	1	0.030597	0.0975862	0.517422	-0.137925	0.301778	0.734803	0.175174
317191	APOOL	apolipoprotein O-like	0.0402201	0.56143	-0.33252	0.549162	0.830276	-0.103965	0.000433524	0.0612845	-0.379389	0.157446	0.520198	-0.196311	0.640545	1	-0.0801072	0.640736	1	0.0856315	0.0444575	0.612323	-0.306626	0.274205	0.906564	-0.149555	0.34317	0.821058	-0.17906	0.941531	1	0.00869685
299341	APOPT1	apoptogenic 1, mitochondrial	0.778646	1	-0.10014	0.155299	0.475057	-0.403109	0.644996	0.980126	0.113428	0.920248	1	-0.0528592	0.291093	0.886495	-0.188695	0.0984227	1	-0.362312	0.777904	1	0.0957332	0.296803	0.926762	-0.285266	0.344044	0.822102	-0.220962	0.4016	0.821648	-0.256234
54226	App	amyloid beta (A4) precursor protein	0.0359449	0.555306	0.206824	0.703872	0.970995	0.0550132	0.00193464	0.0935518	0.265531	0.432408	0.798862	0.09656	0.89867	1	0.0235782	0.722473	1	-0.0571386	0.0293854	0.612323	0.239413	0.285731	0.915344	0.169565	0.554627	0.955905	0.0637809	0.587513	0.934057	-0.101412
303396	APPBP2	amyloid beta precursor protein (cytoplasmic tail) binding protein 2	0.00294341	0.452792	0.961521	0.0722663	0.357656	0.588266	0.0144466	0.209442	0.66893	0.0201761	0.18593	0.49466	0.094233	0.750041	0.600875	0.636453	1	0.149162	0.0392109	0.612323	0.657606	0.0150143	0.74747	0.603523	0.0168516	0.296644	0.727183	0.479951	0.881719	0.19935
362860	APPL2	adaptor protein, phosphotyrosine interaction, PH domain and leucine zipper containing 2	0.0227222	0.516421	-0.374314	0.248273	0.568826	-0.189409	4.49025e-05	0.02885	-0.386341	0.01422	0.151354	-0.265346	0.651443	1	-0.105514	0.543539	1	0.068414	0.0148026	0.612323	-0.344247	0.519418	1	-0.114426	0.215302	0.674377	-0.194019	0.274711	0.711048	-0.140627
292072	APRT	adenine phosphoribosyltransferase	0.84549	1	0.0641942	0.644127	0.919026	-0.0639409	0.375957	0.785085	0.160979	0.536274	0.884699	0.1083	0.653211	1	-0.0750051	0.373111	1	-0.180623	0.606104	0.989167	0.120491	0.418709	0.984511	-0.20824	0.956395	1	-0.0276383	0.613383	0.951965	0.120191
259271	APTX	aprataxin	0.888221	1	-0.0180894	0.267164	0.589201	0.106716	0.769107	1	-0.0354984	0.47523	0.833917	0.147642	0.935565	1	-0.00514329	0.947247	1	-0.0388724	0.639748	1	-0.0668871	0.316105	0.938251	0.193694	0.812996	1	0.0352504	0.762285	1	-0.0507218
25240	AQP1	aquaporin 1 (Colton blood group)	0.316606	0.804986	-0.316303	0.12795	0.438224	-0.702729	0.443887	0.834589	-0.173283	0.51364	0.864357	-0.223266	0.0824661	0.745898	-0.312102	0.0401835	1	-0.612819	0.408054	0.891717	-0.156648	0.582262	1	-0.180245	0.0543113	0.425291	-0.32145	0.00267705	0.171392	-0.801179
286758	AQP11	aquaporin 11	0.837041	1	-0.074101	0.0902703	0.38581	-0.384792	0.463873	0.842789	-0.143222	0.00840792	0.112923	-0.538174	0.796613	1	0.149341	0.636485	1	0.119852	0.265464	0.790706	-0.219078	0.106701	0.752744	-0.425875	0.538974	0.953214	0.147017	0.748023	1	-0.0983575
367316	AQP12A/AQP12B	aquaporin 12A	0.0619414	0.602708	1.027	0.124423	0.435003	-0.538781	0.24032	0.64798	0.566149	0.278046	0.677126	-0.205995	0.0272019	0.721469	0.810377	0.0916756	1	-0.395729	0.0571955	0.618368	0.730118	0.311572	0.935623	-0.282611	0.0898738	0.504232	0.755721	0.0462806	0.394951	-0.456744
25386	AQP2	aquaporin 2 (collecting duct)	1	1	0	1	1	0	1	1	0	1	1	0	1	1	0	1	1	0	1	1	0	1	1	0	1	1	0	1	1	0
65133	AQP3	aquaporin 3 (Gill blood group)	0.395464	0.83352	0.46067	1	1	0	0.206766	0.607213	0.454614	0.606458	0.939939	0.0670043	0.561052	1	0.230335	0.606458	1	-0.0670043	0.073641	0.638547	0.580429	0.421516	0.986362	-0.172964	0.782383	1	0.108557	0.421516	0.833867	0.172964
25293	AQP4	aquaporin 4	0.0771993	0.615352	-0.44397	0.825052	1	-0.0520288	0.0103141	0.184377	-0.417042	0.400452	0.768496	0.214462	0.573756	1	-0.205605	0.291501	1	-0.343253	0.0809232	0.646725	-0.360232	0.540588	1	0.189199	0.160687	0.597398	-0.291288	0.401979	0.821648	-0.284158
25241	AQP5	aquaporin 5	1	1	0	0.422647	0.708159	-0.171541	1	1	0	0.195798	0.579481	-0.16922	1	1	0	0.885948	1	-0.088092	1	1	0	0.395831	0.979785	-0.141403	1	1	0	0.467981	0.872247	-0.115908
29170	AQP6	aquaporin 6, kidney specific	1	1	0	1	1	0	1	1	0	1	1	0	1	1	0	1	1	0	1	1	0	1	1	0	1	1	0	1	1	0
29171	AQP7	aquaporin 7	1	1	0	0.18378	0.50555	-0.334351	1	1	0	0.195944	0.579481	-0.167176	1	1	0	0.105897	1	-0.252946	1	1	0	0.395979	0.979785	-0.140041	1	1	0	0.00749622	0.221786	-0.334351
29172	AQP8	aquaporin 8	0.184107	0.69949	-0.34595	0.20477	0.522587	-0.424436	0.807577	1	-0.0866644	0.285998	0.687241	-0.208322	0.00706792	0.721469	-0.342441	0.144202	1	-0.216114	0.228614	0.763908	-0.200575	0.177205	0.83688	-0.255341	0.103173	0.525248	-0.288409	0.134509	0.543666	-0.310573
65054	AQP9	aquaporin 9	0.0248988	0.527267	0.771258	0.18394	0.50555	-0.354685	0.0358238	0.304292	0.586267	0.292944	0.693396	-0.274339	0.0602056	0.73794	0.474745	0.588763	1	-0.166116	0.00253576	0.612323	0.682143	0.741966	1	-0.0897796	0.146988	0.582141	0.442786	0.135392	0.545017	-0.411724
366163	AQR	aquarius homolog (mouse)	0.0242053	0.524363	-0.372094	0.10467	0.406628	-0.145621	0.00157647	0.088127	-0.310156	0.197183	0.580545	-0.209328	0.186536	0.817027	-0.205345	0.66116	1	0.0389115	0.0338755	0.612323	-0.267638	0.774898	1	0.033916	0.0204222	0.309269	-0.276289	0.219789	0.659076	-0.236342
24208	AR	androgen receptor	0.69564	1	0.0923218	0.646318	0.921071	-0.0478551	0.739581	1	0.116681	0.710686	1	0.12541	0.824164	1	0.0522323	0.589624	1	-0.208934	0.220674	0.757251	0.254659	0.522606	1	0.218302	0.556919	0.957222	-0.106033	0.405411	0.824077	-0.293998
64363	ARAF	v-raf murine sarcoma 3611 viral oncogene homolog	0.242883	0.742604	-0.107261	0.0331753	0.29911	-0.280319	0.890839	1	-0.0204094	0.329969	0.72137	-0.104786	0.0864281	0.745898	-0.142615	0.00832926	1	-0.20606	0.772458	1	-0.0214345	0.0620736	0.751369	-0.175264	0.0770078	0.477884	-0.140168	0.0391158	0.376644	-0.20867
305367	ARAP2	ArfGAP with RhoGAP domain, ankyrin repeat and PH domain 2	0.170406	0.693599	-0.397608	0.226108	0.543873	-0.304877	0.0627652	0.380577	-0.385042	0.149977	0.508584	-0.363189	0.58677	1	-0.148498	0.801372	1	0.0064965	0.19533	0.737578	-0.315501	0.823475	1	0.0323941	0.221846	0.684426	-0.259953	0.118236	0.516564	-0.456168
54323	ARC	activity-regulated cytoskeleton-associated protein	0.332932	0.8202	0.777445	0.0433773	0.315179	-0.309461	0.0381117	0.31204	0.891363	0.0422776	0.275435	-0.408574	0.592747	1	0.297018	0.83353	1	0.0255451	0.169203	0.707993	0.645057	0.0414236	0.750579	-0.441619	0.305573	0.784233	0.528515	0.953178	1	0.0044827
300674	ARCN1	archain 1	0.78104	1	-0.0110727	0.0193553	0.268549	0.40531	0.306997	0.710252	-0.098716	0.0738134	0.365951	0.355153	0.39082	0.957237	0.0731018	0.55768	1	0.0988635	0.408337	0.891848	-0.0896176	0.0143937	0.74747	0.467132	0.519845	0.953214	0.0700067	0.765113	1	0.0895163
29183	AREG/AREGB	amphiregulin	0.280682	0.774467	0.326064	0.0761121	0.364815	0.677456	0.203314	0.602897	0.25304	0.173787	0.546755	0.592759	0.349224	0.926198	0.203588	0.640198	1	0.243301	0.503267	0.952018	0.143132	0.995179	1	-0.0413639	0.0750603	0.470994	0.335141	0.020849	0.311454	0.997507
64310	Arf1	ADP-ribosylation factor 1	0.305879	0.795771	0.136418	0.203644	0.522059	0.380131	0.287246	0.689277	0.0816682	0.023472	0.200869	0.298431	0.235471	0.854629	0.0670476	0.339921	1	0.11744	0.254529	0.78313	0.0903639	0.0467567	0.750579	0.295962	0.206367	0.66315	0.0956262	0.166704	0.591488	0.222793
79119	ARF1	ADP-ribosylation factor 1	0.458925	0.861822	0.0907741	0.40848	0.708159	0.110133	0.760985	1	-0.0215179	0.277408	0.676827	0.114633	0.0699556	0.739543	0.137185	0.682588	1	0.0530754	0.956193	1	0.00303364	0.689382	1	0.0449132	0.15027	0.585763	0.126296	0.198025	0.628234	0.121122
140940	ARF3	ADP-ribosylation factor 3	0.190229	0.701308	0.162718	0.425795	0.711231	0.984644	0.00821743	0.167999	0.200588	0.321053	0.712562	0.539397	0.917559	1	0.0315155	0.379234	1	0.414249	0.055248	0.618368	0.175388	0.537126	1	0.36924	0.549147	0.953214	0.0646975	0.129185	0.536136	0.933286
79120	ARF4	ADP-ribosylation factor 4	0.0214194	0.514432	0.268557	0.0981656	0.398038	0.170136	0.00737687	0.160453	0.198388	0.0178254	0.172776	0.21446	0.22411	0.844538	0.146559	0.686839	1	-0.00638455	0.0514249	0.618368	0.188531	0.161221	0.825496	0.174164	0.0336763	0.366245	0.195008	0.594245	0.939227	0.0653312
79117	ARF5	ADP-ribosylation factor 5	0.411717	0.83352	0.178833	0.144624	0.459934	0.0712085	0.189898	0.591224	0.206309	0.456972	0.817942	0.178496	0.857647	1	0.0169968	0.61887	1	-0.0854512	0.244583	0.772776	0.196948	0.60576	1	-0.141986	0.667813	1	0.0563203	0.427821	0.837552	0.244209
79121	ARF6	ADP-ribosylation factor 6	0.0797662	0.615693	0.401006	0.0137748	0.252542	0.398373	0.0414416	0.324781	0.280263	1.77848e-05	0.00605751	0.380352	0.0722912	0.740333	0.289084	0.696151	1	0.0808802	0.142126	0.685277	0.238032	0.0228289	0.74747	0.323658	0.00353536	0.206886	0.352756	0.10442	0.494263	0.228458
246310	ARFGAP1	ADP-ribosylation factor GTPase activating protein 1	0.646977	1	0.166179	0.502048	0.784033	0.1711	0.160733	0.550028	0.237447	0.127117	0.468267	0.217307	0.835596	1	-0.119652	0.818151	1	-0.0638061	0.37886	0.872696	0.166408	0.482893	1	0.118103	0.854626	1	0.0390359	0.500755	0.896724	0.104164
362162	ARFGAP2	ADP-ribosylation factor GTPase activating protein 2	0.727677	1	-0.0479343	0.330484	0.661434	0.09735	0.446086	0.834589	-0.0752652	0.674455	0.989743	0.0712502	0.923364	1	-0.0252203	0.582562	1	0.0565914	0.378159	0.872403	-0.0917819	0.997806	1	-0.00397141	0.891577	1	0.0103524	0.269023	0.706552	0.143935
503165	Arfgap3	ADP-ribosylation factor GTPase activating protein 3	0.9574	1	-0.00647186	0.0387774	0.308315	0.297273	0.831341	1	-0.0231738	0.00075215	0.030649	0.278707	0.912927	1	-0.0159656	0.540045	1	0.0650776	0.500138	0.952018	-0.0635374	0.121844	0.76771	0.186839	0.578063	0.972453	0.0440191	0.0506294	0.408247	0.225029
296380	ARFGEF2	ADP-ribosylation factor guanine nucleotide-exchange factor 2 (brefeldin A-inhibited)	0.933493	1	0.0173386	0.00256034	0.221049	0.367019	0.403181	0.808166	0.100149	0.623749	0.953063	0.243108	0.513969	1	-0.0809876	0.468726	1	0.179424	0.505031	0.952018	0.0865322	0.126807	0.774456	0.502176	0.627159	1	-0.0628064	0.919177	1	0.00568663
60382	ARFIP1	ADP-ribosylation factor interacting protein 1	0.435955	0.84605	-0.0983594	0.45646	0.737736	0.0914457	0.415612	0.820243	-0.113801	0.996782	1	0.0458153	0.881298	1	-0.0210242	0.67331	1	0.0617614	0.685202	1	-0.0734251	0.202636	0.858431	0.302416	0.539503	0.953214	-0.0698759	0.439265	0.847802	-0.175111
293344	ARFIP2	ADP-ribosylation factor interacting protein 2	0.256342	0.75247	0.13115	0.0168885	0.263656	0.357841	0.0560187	0.362324	0.160789	0.00366391	0.0702662	0.381146	0.949619	1	-0.00148033	0.998977	1	0.0287222	0.12231	0.680364	0.14858	0.375429	0.969434	0.176662	0.635167	1	0.0356729	0.051851	0.411778	0.317802
117051	ARFRP1	ADP-ribosylation factor related protein 1	0.370708	0.83352	-0.229753	0.537156	0.817788	-0.0967541	0.765125	1	-0.0519138	0.789979	1	-0.0119364	0.0703955	0.739543	-0.3156	0.590248	1	-0.0658949	0.536399	0.952018	-0.127725	0.115845	0.760099	-0.221201	0.194035	0.645015	-0.224533	0.55176	0.923051	0.0985034
29221	ARG1	arginase, liver	0.367424	0.83352	-0.3428	0.0448381	0.316239	0.824338	0.279734	0.680163	-0.233904	0.0053143	0.0881232	0.63339	0.20911	0.830684	-0.300682	0.560477	1	0.27218	0.341925	0.851274	-0.212915	0.24046	0.889225	0.419069	0.123086	0.561109	-0.30808	0.0164855	0.289575	0.707125
29215	ARG2	arginase, type II	0.239488	0.740898	0.441659	0.0450094	0.316239	0.484038	0.059946	0.372312	0.408779	0.0259282	0.212185	0.309645	0.44669	0.962785	0.225247	0.191211	1	0.21977	0.0338275	0.612323	0.452727	0.0987048	0.752639	0.29368	0.373192	0.840997	0.200274	0.0163041	0.289575	0.366829
290912	ARGLU1	arginine and glutamate rich 1	0.584817	0.958191	-0.126607	0.633288	0.908737	-0.0790488	0.430021	0.834179	-0.150464	0.549112	0.894441	-0.0811317	0.695856	1	-0.0800659	0.818847	1	0.0143391	0.479577	0.941563	-0.119996	0.584919	1	-0.0585135	0.580289	0.973029	-0.0834538	0.737734	1	-0.0427995
311193	ARHGAP1	Rho GTPase activating protein 1	0.356848	0.83352	-0.19839	0.205723	0.523686	0.132464	0.362609	0.769403	-0.132673	0.95026	1	0.0190554	0.239092	0.857365	-0.18245	0.145593	1	0.113689	0.328543	0.838614	-0.138241	0.367505	0.965681	0.0931783	0.220723	0.68307	-0.16519	0.457377	0.864595	0.083534
688429	ARHGAP10	Rho GTPase activating protein 10	0.0910227	0.626221	0.124289	0.0749089	0.362494	0.375903	0.898905	1	-0.0272372	0.438211	0.803655	0.161395	0.0971383	0.755267	0.195613	0.0147174	1	0.303794	0.597867	0.984276	0.067283	0.250024	0.89433	0.181043	0.38982	0.853816	0.113132	0.00755638	0.221786	0.349923
296060	ARHGAP11A	Rho GTPase activating protein 11A	0.98296	1	-0.00346377	0.691797	0.960346	-0.169711	0.217658	0.621515	-0.17336	0.442067	0.80578	0.240036	0.232281	0.852163	0.146747	0.123986	1	-0.48172	0.43156	0.907677	-0.121566	0.712619	1	0.0990733	0.452015	0.903923	0.109231	0.28278	0.716843	-0.349345
307016	ARHGAP12	Rho GTPase activating protein 12	0.120319	0.651381	-0.350226	0.544393	0.825606	-0.146014	0.0176625	0.227083	-0.391847	0.189928	0.571059	-0.234399	0.845403	1	-0.052707	0.642616	1	0.0723049	0.156878	0.697737	-0.304015	0.902018	1	0.00525306	0.28728	0.762345	-0.194396	0.297716	0.73016	-0.205299
295635	ARHGAP15	Rho GTPase activating protein 15	0.998629	1	-0.00104686	0.660677	0.933511	-0.199778	0.750212	1	-0.18816	0.525458	0.874565	-0.345491	0.75312	1	0.135482	0.958762	1	-0.0592364	0.631113	1	-0.156082	0.272711	0.90612	-0.388961	0.634057	1	0.137476	0.731166	1	0.054274
63994	ARHGAP17	Rho GTPase activating protein 17	0.0332277	0.545152	0.583761	0.6329	0.908487	-0.0465633	0.0605418	0.374553	0.378058	0.521269	0.870818	-0.0554908	0.0220079	0.721469	0.435337	0.972465	1	-0.0209662	0.0655267	0.62404	0.353907	0.43273	0.989018	-0.0633495	0.00429412	0.21395	0.500985	0.980289	1	-0.00869948
293947	ARHGAP18	Rho GTPase activating protein 18	0.144034	0.666728	-0.161283	0.290342	0.615412	-0.109162	0.0853842	0.430591	-0.128123	0.232162	0.625186	-0.103428	0.601482	1	-0.0832637	0.53037	1	-0.0402063	0.286122	0.80874	-0.10774	0.230353	0.882941	-0.0925754	0.203146	0.658585	-0.124005	0.452539	0.859552	-0.0644648
367085	ARHGAP20	Rho GTPase activating protein 20	0.0853156	0.623827	0.858963	0.288787	0.613834	0.396688	0.00964582	0.178728	0.784232	0.981143	1	0.138609	0.379613	0.948894	0.448961	0.273469	1	0.445996	0.0648828	0.62404	0.673062	0.257353	0.896761	0.502839	0.120223	0.557266	0.596965	0.906189	1	0.0887172
307178	ARHGAP21	Rho GTPase activating protein 21	0.97532	1	0.00725303	0.248435	0.569115	-0.143718	0.539379	0.900905	-0.0672213	0.213304	0.599238	-0.207525	0.495657	0.98714	0.0983168	0.601293	1	0.0586176	0.860762	1	-0.0358289	0.815069	1	0.0324828	0.805201	1	0.0534471	0.307714	0.740514	-0.225836
306279	ARHGAP22	Rho GTPase activating protein 22	0.574059	0.949793	0.119906	0.169022	0.491453	0.14999	0.599619	0.944891	-0.0623521	0.697471	1	0.0612292	0.0866543	0.745956	0.266172	0.810529	1	0.103356	0.887536	1	-0.00868378	0.349879	0.956172	-0.247024	0.238244	0.702804	0.196529	0.0829579	0.472026	0.451876
305156	ARHGAP24	Rho GTPase activating protein 24	0.0501698	0.580922	-0.704148	0.0408481	0.313217	-0.431654	0.00508413	0.136782	-0.572059	0.00108073	0.035847	-0.413831	0.165671	0.805416	-0.415005	0.643716	1	-0.113426	0.0483043	0.612323	-0.493106	0.159812	0.824553	-0.259895	0.0164432	0.294203	-0.540063	0.0248811	0.323673	-0.347511
500246	ARHGAP25	Rho GTPase activating protein 25	0.134273	0.660825	0.103156	0.197171	0.516678	-0.565615	0.770722	1	-0.00559881	0.0182938	0.175025	-0.452558	0.230964	0.850085	0.150465	0.421074	1	-0.217503	0.655634	1	0.0836603	0.123742	0.771067	-0.366898	0.666199	1	0.0677838	0.0802711	0.468638	-0.422071
307459	ARHGAP26	Rho GTPase activating protein 26	0.246404	0.744546	0.158307	0.659223	0.932517	-0.0485653	0.156153	0.545165	0.169232	0.399771	0.767629	-0.265286	0.795967	1	0.0738151	0.479552	1	0.187302	0.488268	0.946954	0.0954547	0.473631	1	0.271727	0.328281	0.807311	0.143868	0.385492	0.814204	-0.346288
303583	ARHGAP27	Rho GTPase activating protein 27	0.399216	0.83352	-0.185716	0.0996279	0.400631	-0.298799	0.0441514	0.33388	-0.246945	0.660138	0.979034	-0.125454	0.90612	1	-0.0563701	0.220216	1	-0.267063	0.155218	0.696323	-0.192545	0.599518	1	-0.105544	0.53631	0.953214	-0.0942757	0.178026	0.606021	-0.324093
301709	ARHGAP28	Rho GTPase activating protein 28	0.0840854	0.622222	0.613185	0.174234	0.498408	0.60046	0.155609	0.544459	0.35138	0.0489815	0.30029	0.667595	0.140856	0.78667	0.518304	0.814409	1	0.0888307	0.519774	0.952018	0.215545	0.0588098	0.751369	0.65931	0.00407544	0.212181	0.687535	0.624807	0.957988	0.193292
310833	ARHGAP29	Rho GTPase activating protein 29	0.604612	0.972198	-0.0941636	0.0415464	0.313217	-0.316653	0.403374	0.808457	-0.097503	0.396603	0.764737	-0.297729	0.903917	1	0.0107366	0.829414	1	-0.0933308	0.507833	0.952018	-0.092043	0.768302	1	0.109937	0.724735	1	-0.0310427	0.121079	0.521228	-0.556943
498282	ARHGAP30	Rho GTPase activating protein 30	0.613062	0.978347	-0.0843507	0.0497094	0.321849	-0.515142	0.829724	1	0.0102173	0.147728	0.504472	-0.421807	0.408243	0.962785	-0.0893296	0.819411	1	-0.141356	0.99746	1	0.00370935	0.379467	0.97117	-0.334257	0.269182	0.741531	-0.114431	0.353656	0.784724	-0.368606
288093	ARHGAP31	Rho GTPase activating protein 31	0.609247	0.975786	0.150422	0.094316	0.392628	-0.403608	0.288192	0.690462	0.182765	0.403513	0.771334	-0.255667	0.824706	1	0.0373478	0.506169	1	-0.248012	0.154598	0.69536	0.218939	0.818402	1	0.0783635	0.961856	1	0.00485449	0.036806	0.369144	-0.649864
306400	ARHGAP35	Rho GTPase activating protein 35	0.0930225	0.626221	-0.375017	0.158819	0.48024	-0.200981	0.00096195	0.0760809	-0.375098	0.0508849	0.305931	-0.466607	0.528132	1	-0.135052	0.290981	1	0.20172	0.0207757	0.612323	-0.335577	0.860055	1	-0.107248	0.190536	0.639386	-0.20949	0.499789	0.895847	-0.182029
500901	ARHGAP39	Rho GTPase activating protein 39	0.612735	0.978238	-0.103391	0.696899	0.96472	0.0668382	0.293484	0.696029	-0.132217	0.944409	1	0.0575886	0.883351	1	0.00215953	0.486031	1	0.0673518	0.167599	0.705433	-0.157436	0.185745	0.843082	0.168621	0.93421	1	0.0106922	0.559781	0.923051	-0.060136
246249	ARHGAP4	Rho GTPase activating protein 4	0.273307	0.766239	-0.222192	0.0400408	0.31151	-0.856487	0.442972	0.834589	-0.141263	0.00358973	0.0692706	-0.809563	0.153961	0.794983	-0.201319	0.668857	1	-0.14773	0.077922	0.646702	-0.226582	0.0456176	0.750579	-0.684325	0.512193	0.952723	-0.109805	0.214392	0.649364	-0.49126
299012	ARHGAP5	Rho GTPase activating protein 5	0.832421	1	-0.0693678	0.774762	1	0.0830792	0.478922	0.85567	-0.181865	0.815166	1	-0.0761716	0.682685	1	0.158835	0.71653	1	0.16747	0.927553	1	-0.0515784	0.287605	0.916397	0.756239	0.825402	1	-0.025466	0.362986	0.795374	-0.642727
300115	ARHGAP8/PRR5-ARHGAP8	Rho GTPase activating protein 8	0.176618	0.69949	-0.244408	0.252135	0.572896	0.128219	0.472273	0.8513	-0.0994491	0.871858	1	-0.00446152	0.0952189	0.75073	-0.247008	0.262536	1	0.155825	0.367129	0.865838	-0.132583	0.484561	1	-0.123136	0.113071	0.544109	-0.227311	0.0379248	0.373761	0.30181
362893	ARHGAP9	Rho GTPase activating protein 9	0.503575	0.898263	-0.207434	0.620239	0.896625	-0.043895	0.611849	0.953934	-0.170841	0.999779	1	0.00767271	0.46106	0.967065	-0.124012	0.792038	1	-0.0235319	0.246411	0.773383	-0.247496	0.463771	1	-0.131531	0.866682	1	-0.0582229	0.666457	0.986764	0.0823499
360678	ARHGDIA	Rho GDP dissociation inhibitor (GDI) alpha	0.279675	0.773068	0.175202	0.0867844	0.3827	0.297714	0.106959	0.46974	0.258669	0.0505671	0.304942	0.38032	0.828617	1	-0.0417589	0.784306	1	-0.036359	0.237631	0.76995	0.218854	0.6799	1	0.120432	0.788534	1	0.0286514	0.181586	0.610062	0.291936
362456	ARHGDIB	Rho GDP dissociation inhibitor (GDI) beta	0.380899	0.83352	0.149686	0.0743962	0.361435	-0.503878	0.203578	0.602946	0.209634	0.145486	0.50068	-0.277103	0.86069	1	-0.0307972	0.323587	1	-0.275663	0.494642	0.950163	0.144948	0.0712158	0.752639	-0.433339	0.646556	1	0.0643505	0.303718	0.73674	-0.254795
360500	ARHGDIG	Rho GDP dissociation inhibitor (GDI) gamma	0.591154	0.962522	0.170844	0.188402	0.50999	0.539455	0.479025	0.85567	0.140183	0.427433	0.794833	0.376459	0.668635	1	0.098352	0.480566	1	0.344397	0.75537	1	0.0720704	0.909928	1	-0.00213592	0.362577	0.836812	0.178285	0.0538756	0.418004	0.781876
60323	ARHGEF1	Rho guanine nucleotide exchange factor (GEF) 1	0.226323	0.730708	-0.233876	0.500226	0.782335	-0.105057	0.26047	0.657157	-0.144757	0.398756	0.766717	-0.0747505	0.18627	0.817027	-0.212202	0.881048	1	-0.0777154	0.242156	0.772776	-0.161101	0.438452	0.991675	-0.113472	0.157957	0.593296	-0.191762	0.739807	1	-0.0424076
78966	ARHGEF11	Rho guanine nucleotide exchange factor (GEF) 11	0.413256	0.83352	-0.134238	0.0411409	0.313217	-0.236053	0.394809	0.800774	-0.0950869	0.357354	0.749037	-0.224667	0.391795	0.957876	-0.0917252	0.984046	1	-0.0662125	0.480928	0.941972	-0.0851442	0.766447	1	0.063672	0.269713	0.741584	-0.111364	0.181253	0.609546	-0.396685
367072	ARHGEF12	Rho guanine nucleotide exchange factor (GEF) 12	0.402237	0.83352	0.170885	0.0260775	0.285919	0.135128	0.353751	0.760706	0.152182	0.953864	1	0.121259	0.675284	1	0.111944	0.812057	1	0.0289995	0.430415	0.907019	0.13118	0.303154	0.93089	0.506412	0.548358	0.953214	0.127747	0.494979	0.892166	-0.321198
287418	ARHGEF15	Rho guanine nucleotide exchange factor (GEF) 15	0.738331	1	-0.158926	0.0432456	0.315179	-0.587722	0.303305	0.707353	-0.188054	0.584098	0.922916	-0.166897	0.913937	1	0.0430675	0.0185051	1	-0.554999	0.452402	0.92188	-0.168239	0.145013	0.803074	-0.372792	0.85746	1	-0.0390163	0.102787	0.494263	-0.455562
304193	ARHGEF18	Rho/Rac guanine nucleotide exchange factor (GEF) 18	0.149157	0.671109	-0.231184	0.893669	1	0.0131855	0.378872	0.787422	-0.104774	0.541021	0.888004	-0.0565402	0.0110641	0.721469	-0.212236	0.461511	1	0.0486814	0.27769	0.802081	-0.118284	0.865343	1	0.0115195	0.0117477	0.273111	-0.21857	0.973548	1	-0.000953609
362648	ARHGEF19	Rho guanine nucleotide exchange factor (GEF) 19	0.667312	1	-0.0429762	0.670674	0.942141	-0.151159	0.242243	0.649976	-0.378124	0.685156	0.998051	-0.131752	0.337358	0.916447	0.303754	0.854911	1	-0.0824063	0.122343	0.680364	-0.426122	0.328805	0.945287	-0.28189	0.192671	0.642506	0.358356	0.76367	1	0.0593458
310635	ARHGEF2	Rho/Rac guanine nucleotide exchange factor (GEF) 2	0.0746025	0.615352	-0.231804	0.403072	0.708159	0.129965	0.960177	1	0.00514156	0.918415	1	0.0628774	0.0249249	0.721469	-0.313581	0.298382	1	0.107868	0.8975	1	0.0215218	0.49498	1	0.104893	0.00898392	0.260668	-0.356139	0.563113	0.923051	0.0819872
314904	ARHGEF25	Rho guanine nucleotide exchange factor (GEF) 25	0.21561	0.720295	0.11167	0.0617415	0.342717	-0.377029	0.173161	0.565904	0.147379	0.69074	1	-0.137297	0.800882	1	-0.0225588	0.136116	1	-0.338138	0.819852	1	0.049176	0.0844001	0.752639	-0.3935	0.358937	0.835375	0.1041	0.67615	0.994493	-0.142008
361882	ARHGEF28	Rho guanine nucleotide exchange factor (GEF) 28	0.00311571	0.452792	0.250478	0.0415225	0.313217	0.932635	0.0327344	0.293713	0.224236	0.000254461	0.0182117	0.924116	0.458857	0.965806	0.106386	0.860962	1	0.143017	0.215683	0.754298	0.157076	0.138301	0.79279	0.593881	0.145453	0.578755	0.203609	0.0574851	0.428182	0.694465
290541	ARHGEF3	Rho guanine nucleotide exchange factor (GEF) 3	0.760067	1	-0.0755	0.0387482	0.308315	-0.604557	0.21649	0.620678	-0.189633	0.000942994	0.0338088	-0.67289	0.536238	1	0.130679	0.890807	1	-0.0246509	0.584163	0.973876	-0.102839	0.176775	0.83688	-0.383049	0.974145	1	0.00768718	0.128545	0.534721	-0.454021
307398	ARHGEF37	Rho guanine nucleotide exchange factor (GEF) 37	0.185461	0.699913	0.559304	0.0738933	0.360471	0.521672	0.139483	0.522524	0.457401	0.146174	0.501099	0.351075	0.186463	0.817027	0.368588	0.326648	1	0.232613	0.0632863	0.62404	0.480984	0.0794354	0.752639	0.438039	0.265707	0.737571	0.35365	0.373644	0.80383	0.278195
298404	ARHGEF39	Rho guanine nucleotide exchange factor (GEF) 39	0.0192444	0.509491	0.888482	0.0792035	0.369756	0.310832	0.045356	0.337081	0.571055	0.554383	0.899277	0.0845799	0.00669539	0.721469	0.653335	0.2896	1	0.2994	0.0299145	0.612323	0.565405	0.863587	1	-0.017471	0.00117417	0.152169	0.731208	0.0303853	0.350085	0.456297
361034	ARHGEF40	Rho guanine nucleotide exchange factor (GEF) 40	0.165062	0.6861	-0.594129	0.0067461	0.242377	-0.659367	0.0916125	0.443227	-0.398216	0.00180241	0.0480603	-0.54912	0.0657502	0.739543	-0.466965	0.513835	1	-0.236168	0.1154	0.677355	-0.389514	0.113878	0.758153	-0.420809	0.0246188	0.331692	-0.493009	0.0252473	0.325236	-0.500321
363509	ARHGEF6	Rac/Cdc42 guanine nucleotide exchange factor (GEF) 6	0.772179	1	0.0844206	0.146874	0.46337	-0.243104	0.494301	0.868517	-0.10694	0.170773	0.541618	-0.352372	0.254436	0.857365	0.269541	0.684863	1	0.0892653	0.864951	1	0.0163222	0.887843	1	0.05343	0.763262	1	0.122299	0.232389	0.672277	-0.384236
114559	Arhgef7	Rho guanine nucleotide exchange factor (GEF) 7	0.405063	0.83352	0.104881	0.152524	0.47133	-0.175418	0.726486	1	-0.0505496	0.0125612	0.141731	-0.41577	0.140944	0.78667	0.175751	0.226827	1	0.200199	0.69619	1	-0.0622498	0.22889	0.88198	-0.265438	0.0888514	0.503205	0.208864	0.946613	1	0.0181629
66013	ARHGEF9	Cdc42 guanine nucleotide exchange factor (GEF) 9	0.493209	0.889762	-0.158838	0.0960755	0.394701	-0.535233	0.426078	0.830609	-0.154186	0.0252009	0.209147	-0.650542	0.65454	1	-0.0445095	0.984992	1	-0.0240594	0.357098	0.864035	-0.162881	0.466352	1	-0.250754	0.685407	1	-0.0621885	0.116847	0.513921	-0.509346
297867	ARID1A	AT rich interactive domain 1A (SWI-like)	0.479717	0.878638	0.133804	0.101248	0.403011	-0.220097	0.966404	1	0.030969	0.494106	0.848489	-0.0774586	0.109408	0.765689	0.180936	0.606586	1	-0.16666	0.421199	0.901883	0.0937843	0.656482	1	0.0812404	0.436874	0.892225	0.110655	0.0559574	0.422784	-0.38271
314616	ARID3A	AT rich interactive domain 3A (BRIGHT-like)	0.404506	0.83352	-0.258717	0.680348	0.950363	0.0331097	0.447746	0.834589	-0.150156	0.792354	1	-0.0326415	0.266045	0.862984	-0.196213	0.707578	1	0.0489304	0.348639	0.856509	-0.188281	0.467407	1	0.236132	0.307528	0.785659	-0.185893	0.548955	0.923051	-0.197592
367092	ARID3B	AT rich interactive domain 3B (BRIGHT-like)	0.963024	1	0.00916375	0.234839	0.553501	-0.239241	0.30709	0.710344	-0.131848	0.0429222	0.277965	-0.368144	0.27529	0.869455	0.199552	0.536341	1	0.114613	0.450336	0.920786	-0.148672	0.744253	1	-0.0874187	0.404001	0.865753	0.180403	0.28333	0.717275	-0.236333
502946	ARID3C	AT rich interactive domain 3C (BRIGHT-like)	0.422648	0.83352	0.245864	1	1	0	0.19768	0.595322	0.245864	0.114974	0.447429	0.189903	0.45421	0.962785	0.122932	0.114974	1	-0.189903	0.135389	0.680364	0.245864	0.397682	0.979785	-0.126602	0.536795	0.953214	0.122932	0.397682	0.819358	0.126602
314205	ARID4A	AT rich interactive domain 4A (RBP1-like)	0.951304	1	-0.0180129	0.0987624	0.399008	0.218129	0.417909	0.821538	-0.166661	0.645247	0.968415	0.146443	0.489036	0.983613	0.169396	0.525862	1	0.130964	0.52141	0.952018	-0.14569	0.119792	0.76771	0.347031	0.604955	0.989767	0.128589	0.786529	1	-0.0364332
84481	ARID4B	AT rich interactive domain 4B (RBP1-like)	0.277596	0.770571	0.201875	0.405037	0.708159	0.853481	0.739661	1	-0.034719	0.500688	0.853739	0.323629	0.056936	0.731237	0.331347	0.198017	1	0.529077	0.797684	1	0.0333441	0.316042	0.938251	0.497094	0.177811	0.621274	0.267406	0.229152	0.66846	0.640622
316327	ARID5A	AT rich interactive domain 5A (MRF1-like)	0.0574512	0.594608	1.37917	0.0356229	0.303379	1.35567	0.000630966	0.0680865	1.31305	3.33246e-05	0.00755739	1.34154	0.438484	0.962785	0.555578	0.725986	1	0.181359	0.0416214	0.612323	1.10126	0.0963243	0.752639	0.900615	0.119742	0.556096	0.900781	0.0896085	0.481383	0.962688
309728	ARID5B	AT rich interactive domain 5B (MRF1-like)	0.196504	0.70623	0.680514	0.56548	0.846506	0.0683961	0.0507331	0.350873	0.574958	0.802427	1	-0.0401055	0.237424	0.857363	0.405139	0.720927	1	0.105583	0.0375354	0.612323	0.593712	0.244218	0.891117	0.823024	0.236633	0.701665	0.413502	0.300593	0.733022	-0.732802
300756	ARIH1	ariadne homolog, ubiquitin-conjugating enzyme E2 binding protein, 1 (Drosophila)	0.0646154	0.603701	0.447109	0.0975612	0.39748	0.259217	0.120367	0.491689	0.281108	0.534905	0.883724	0.134658	0.047744	0.721469	0.354825	0.328973	1	0.152655	0.100395	0.661947	0.283527	0.0543054	0.751369	0.332919	0.0227572	0.321356	0.37556	0.992727	1	0.0220695
316005	ARIH2	ariadne homolog 2 (Drosophila)	0.241171	0.740966	0.160846	0.434497	0.718606	0.117959	0.809557	1	0.0421571	0.643383	0.96749	0.0538085	0.0678312	0.739543	0.202967	0.214088	1	0.0950904	0.646692	1	0.048532	0.531544	1	0.0534908	0.0716067	0.465753	0.194022	0.187029	0.615653	0.114101
64187	ARL1	ADP-ribosylation factor-like 1	0.523528	0.914429	-0.0317994	0.0954075	0.393941	0.221325	0.598981	0.944306	-0.0573503	0.120403	0.456775	0.246976	0.967254	1	-0.00234049	0.879569	1	-0.00844657	0.552088	0.952443	-0.0678448	0.0691153	0.752639	0.293896	0.947252	1	0.0161484	0.950002	1	0.00693857
306767	ARL10	ADP-ribosylation factor-like 10	0.99521	1	0.000827422	0.797317	1	0.0755531	0.236592	0.64428	0.200007	0.890748	1	-7.63413e-05	0.238906	0.857365	-0.208469	0.574598	1	0.0608346	0.808566	1	0.0624693	0.785982	1	0.0403114	0.812919	1	-0.0644624	0.842771	1	0.0554944
364396	ARL11	ADP-ribosylation factor-like 11	0.509908	0.903753	0.0344767	0.189395	0.511228	-0.595797	0.131438	0.51243	0.270067	0.331675	0.722859	-0.359141	0.217127	0.837433	-0.224872	0.370766	1	-0.257381	0.544287	0.952018	0.140838	0.0979825	0.752639	-0.582785	0.711476	1	-0.0912962	0.649312	0.97461	-0.21852
501617	ARL13A	ADP-ribosylation factor-like 13A	0.823665	1	-0.0778246	0.267107	0.589187	-0.249649	0.697487	1	-0.038525	0.666757	0.983872	-0.0320203	0.943439	1	0.0480945	0.334285	1	-0.249392	0.971695	1	0.00357715	0.618656	1	-0.118758	0.647906	1	-0.0782119	0.285221	0.718326	-0.224695
304037	ARL13B	ADP-ribosylation factor-like 13B	0.922945	1	0.0141424	0.242804	0.562114	-0.187238	0.490613	0.866267	-0.10842	0.527557	0.876774	-0.0876963	0.424711	0.962785	0.14979	0.588846	1	-0.112581	0.682764	1	-0.0912016	0.809444	1	0.0307527	0.597473	0.983849	0.119134	0.103185	0.494263	-0.28475
311279	ARL14EP	ADP-ribosylation factor-like 14 effector protein	0.0729971	0.615352	-0.429257	0.0134591	0.252542	-0.312316	0.0066128	0.153847	-0.419159	0.0544885	0.315395	-0.363555	0.40115	0.961035	-0.193926	0.968346	1	-0.00242856	0.0477738	0.612323	-0.356105	0.631486	1	-0.105527	0.13382	0.564287	-0.277514	0.101518	0.494263	-0.328784
65142	ARL2	ADP-ribosylation factor-like 2	0.967796	1	0.0147788	0.068029	0.351047	-0.547497	0.31465	0.718586	0.186827	0.600717	0.935291	-0.264604	0.360735	0.934627	-0.229012	0.168754	1	-0.407476	0.566137	0.961823	0.14042	0.138491	0.793309	-0.484552	0.63048	1	-0.139703	0.514055	0.90672	-0.286971
498910	ARL2BP	ADP-ribosylation factor-like 2 binding protein	0.233635	0.73693	0.140519	0.171763	0.496068	0.136599	0.113939	0.48237	0.0924319	0.0354122	0.249057	0.182395	0.129549	0.784236	0.0891697	0.606539	1	-0.0434103	0.118834	0.680364	0.0984825	0.245085	0.891137	0.140544	0.0792937	0.483311	0.102571	0.667371	0.987689	0.042383
64664	ARL3	ADP-ribosylation factor-like 3	0.932847	1	-0.0167867	0.0607253	0.341868	-0.372576	0.743491	1	0.022059	0.219289	0.606938	-0.341642	0.59685	1	-0.0758142	0.650189	1	-0.0749014	0.951206	1	0.0105297	0.0931149	0.752639	-0.44182	0.783558	1	-0.0452348	0.872383	1	-0.069604
29308	ARL4A	ADP-ribosylation factor-like 4A	0.68452	1	0.0581458	0.895334	1	-0.0252553	0.430837	0.834589	-0.109478	0.602844	0.936975	-0.139598	0.197929	0.817537	0.228026	0.713618	1	0.132163	0.599231	0.984679	-0.0910191	0.309645	0.934835	-0.203707	0.305715	0.784286	0.188681	0.395735	0.819358	0.175974
303559	ARL4D	ADP-ribosylation factor-like 4D	0.146349	0.669049	0.996108	0.710602	0.977114	0.0835392	0.205287	0.605283	0.536627	0.849794	1	0.0146646	0.0324742	0.721469	0.903295	0.839157	1	0.123438	0.346204	0.853923	0.476283	0.550906	1	-0.133973	0.00413883	0.212279	0.999798	0.296074	0.729215	0.263547
117050	ARL5A	ADP-ribosylation factor-like 5A	0.0151188	0.509491	0.470368	0.00251851	0.219304	0.725744	0.157521	0.546525	0.269862	0.0596604	0.329983	0.54087	0.140729	0.78667	0.339696	0.307257	1	0.29933	0.333663	0.842655	0.208132	0.0153513	0.74747	0.690072	0.0166637	0.295332	0.465421	0.448633	0.856181	0.315738
364788	Arl5b	ADP-ribosylation factor-like 5B	0.118686	0.651381	0.64362	0.0334988	0.299939	0.575581	0.0810407	0.419745	0.533382	0.265059	0.661333	0.578461	0.256157	0.857365	0.368835	0.874578	1	0.0674005	0.0470309	0.612323	0.576637	0.0724022	0.752639	0.918122	0.34026	0.81822	0.367722	0.779783	1	-0.127253
497990	ARL5C	ADP-ribosylation factor-like 5C	0.301215	0.792437	-0.351899	0.121202	0.430564	-0.931567	0.65407	0.987683	-0.0989693	0.0846751	0.390553	-0.684476	0.196078	0.817027	-0.393215	0.601204	1	-0.351537	0.605339	0.988487	-0.141497	0.715383	1	-0.240735	0.186398	0.632215	-0.374464	0.0225081	0.317313	-1.03617
363760	ARL6	ADP-ribosylation factor-like 6	0.0175855	0.509491	-0.283882	0.221302	0.538299	0.268387	0.0574508	0.366079	-0.184464	0.817874	1	0.0693253	0.0348978	0.721469	-0.205948	0.068297	1	0.276742	0.138658	0.6829	-0.164083	0.112603	0.758153	0.249926	0.00117947	0.152169	-0.249936	0.513919	0.90672	0.133817
293551	ARL6IP1	ADP-ribosylation factor-like 6 interacting protein 1	0.020583	0.514432	0.0826014	0.609436	0.886386	-0.0994431	0.730052	1	-0.0277031	0.323619	0.71426	-0.0610602	0.0225343	0.721469	0.138069	0.958123	1	-0.0221673	0.846232	1	-0.0134209	0.974815	1	-0.0117395	0.0418876	0.391474	0.132811	0.25479	0.697039	-0.115446
288656	ARL6IP4	ADP-ribosylation-like factor 6 interacting protein 4	0.470632	0.871976	0.163599	0.10158	0.403069	0.178548	0.151747	0.539471	0.214434	0.124791	0.464169	0.355036	0.930169	1	-0.00556071	0.489771	1	-0.118633	0.296729	0.815838	0.185546	0.87061	1	0.0726904	0.702588	1	0.0476767	0.479464	0.881568	0.184659
66028	ARL6IP5	ADP-ribosylation-like factor 6 interacting protein 5	0.77615	1	-0.0347565	0.0181731	0.265883	0.497117	0.944697	1	-0.0134715	0.0142443	0.151412	0.368132	0.620033	1	-0.0629913	0.313323	1	0.204091	0.67675	1	-0.0373672	0.266253	0.901806	0.219155	0.859706	1	-0.0228769	0.00394039	0.190303	0.468704
499798	ARL6IP6	ADP-ribosylation-like factor 6 interacting protein 6	0.916222	1	0.0221273	0.68013	0.950252	-0.108806	0.435585	0.834589	-0.166888	0.448152	0.81028	-0.110238	0.356529	0.931384	0.257007	0.999328	1	0.00904217	0.872272	1	-0.0217099	0.87144	1	0.0178473	0.761755	1	0.0738768	0.306965	0.739526	-0.160385
498234	ARL8A	ADP-ribosylation factor-like 8A	0.260453	0.755238	0.16785	0.30727	0.634303	0.164336	0.180222	0.576194	0.173098	0.0825793	0.386034	0.212528	0.532528	1	0.0940104	0.923991	1	0.00919606	0.199195	0.739204	0.161517	0.525144	1	0.0879451	0.404238	0.865998	0.0953701	0.269678	0.706773	0.150299
500282	ARL8B	ADP-ribosylation factor-like 8B	0.0681505	0.60965	-0.117755	0.110212	0.414421	0.231404	0.172394	0.564808	-0.0819712	0.118819	0.454616	0.224197	0.301608	0.892909	-0.066268	0.673529	1	0.0563238	0.40708	0.891717	-0.0624543	0.0224978	0.74747	0.301511	0.0725929	0.467041	-0.104713	0.953231	1	0.0234002
289565	ARL9	ADP-ribosylation factor-like 9	0.975163	1	0.00847713	0.717697	0.983613	0.126251	0.560479	0.916719	-0.0844897	0.0598284	0.330483	0.361081	0.516606	1	0.0972054	0.211135	1	-0.355501	0.693002	1	-0.0844897	0.855666	1	0.0482862	0.639967	1	0.0972054	0.683175	0.999697	0.0798252
294948	ARMC1	armadillo repeat containing 1	0.694393	1	0.0429108	0.0925245	0.389887	0.163386	0.895071	1	0.00949815	0.0220965	0.194572	0.144058	0.682928	1	0.0547319	0.838309	1	0.030363	0.736645	1	0.042972	0.0379063	0.750579	0.164017	0.8226	1	0.0213488	0.443374	0.850394	0.057509
296758	ARMC10	armadillo repeat containing 10	0.0598022	0.598152	-0.199436	0.21618	0.53294	0.329868	0.00606613	0.148003	-0.189343	0.415703	0.783209	0.167892	0.497522	0.988917	-0.0615237	0.181294	1	0.275083	0.103194	0.665241	-0.142425	0.701372	1	0.092905	0.1297	0.564287	-0.140633	0.0291874	0.344464	0.384621
294301	ARMC12	armadillo repeat containing 12	1	1	0	1	1	0	1	1	0	1	1	0	1	1	0	1	1	0	1	1	0	1	1	0	1	1	0	1	1	0
361653	ARMC5	armadillo repeat containing 5	0.613	0.978347	-0.104988	0.136347	0.449477	-0.144953	0.572404	0.924686	-0.0606378	0.930991	1	-0.0240639	0.612697	1	-0.13734	0.249233	1	-0.156665	0.841518	1	-0.0438979	0.220769	0.871975	-0.16879	0.338047	0.816472	-0.127083	0.870162	1	-0.0364063
306352	ARMC6	armadillo repeat containing 6	0.448862	0.854856	-0.250504	0.116299	0.422373	0.470126	0.367643	0.775543	-0.18708	0.0396909	0.266326	0.442526	0.303798	0.894627	-0.242203	0.728428	1	0.0477456	0.483057	0.943331	-0.157153	0.341696	0.949295	0.234168	0.188262	0.635628	-0.236445	0.101955	0.494263	0.399382
287827	ARMC7	armadillo repeat containing 7	0.841613	1	-0.00729998	0.677173	0.947908	-0.087296	0.381532	0.789969	-0.051507	0.304702	0.693819	-0.171941	0.478117	0.975481	0.0342928	0.551659	1	0.125995	0.258446	0.784077	-0.0684176	0.155915	0.820983	-0.354489	0.347715	0.824515	0.0553796	0.376063	0.805857	0.251878
315949	ARMC8	armadillo repeat containing 8	0.010039	0.473272	-0.241948	0.269062	0.591462	0.120624	0.00125496	0.0815875	-0.285991	0.829038	1	0.0696722	0.868118	1	-0.0409884	0.508339	1	0.074098	0.0692116	0.63132	-0.224533	0.111822	0.757665	0.238471	0.308048	0.78628	-0.126409	0.581786	0.929811	-0.069924
301579	ARMC9	armadillo repeat containing 9	0.273419	0.766239	-0.318295	0.338106	0.668777	0.122685	0.134727	0.515959	-0.225295	0.274183	0.673351	0.0733102	0.200476	0.82064	-0.246919	0.329902	1	0.0441942	0.154	0.69536	-0.236128	0.340396	0.948632	0.0667039	0.129013	0.564287	-0.239572	0.172866	0.598354	0.095149
501619	ARMCX1	armadillo repeat containing, X-linked 1	0.0904033	0.625586	0.249127	0.406407	0.708159	2.28434	0.105332	0.467866	0.187275	0.363036	0.754425	1.15993	0.296592	0.889038	0.167052	0.288768	1	1.15654	0.115087	0.677212	0.197003	0.494756	1	0.902917	0.200081	0.654058	0.170233	0.107712	0.496338	2.15358
367903	ARMCX2	armadillo repeat containing, X-linked 2	0.0592985	0.598152	0.199648	0.447274	0.730687	0.0846527	0.377562	0.785954	0.0710715	0.452535	0.814236	-0.125726	0.004662	0.721469	0.185793	0.0974035	1	0.214678	0.260175	0.785961	0.0987145	0.595907	1	-0.0719563	0.00932635	0.264366	0.186555	0.172582	0.597979	0.18626
367902	ARMCX3	armadillo repeat containing, X-linked 3	0.624477	0.987358	-0.0574196	0.973453	1	0.00441095	0.642111	0.978035	-0.0428329	0.580164	0.919087	-0.0741383	0.597965	1	-0.0371189	0.558723	1	0.0985367	0.725921	1	-0.0351662	0.541053	1	0.0995523	0.487067	0.932522	-0.048904	0.56473	0.923051	-0.0870086
363496	ARMCX6	armadillo repeat containing, X-linked 6	0.398134	0.83352	0.188312	0.98187	1	-0.00207256	0.109953	0.47466	0.148494	0.158276	0.521865	-0.357509	0.525544	1	0.0784771	0.161318	1	0.381391	0.27533	0.800096	0.127301	0.261597	0.900187	-0.293766	0.213109	0.671957	0.136668	0.26623	0.703762	0.299654
25242	ARNT	aryl hydrocarbon receptor nuclear translocator	0.711441	1	-0.137072	0.608143	0.885466	-0.0460081	0.47825	0.855255	-0.151923	0.768769	1	-0.0345397	0.785322	1	-0.0652917	0.85066	1	-0.0431282	0.498353	0.952018	-0.14509	0.390845	0.979785	0.394658	0.710907	1	-0.0643875	0.32791	0.761636	-0.466556
25243	ARNT2	aryl-hydrocarbon receptor nuclear translocator 2	0.115263	0.648408	-0.557593	0.0210015	0.274464	-0.171912	0.0770955	0.410678	-0.377161	0.048247	0.297482	-0.331617	0.053581	0.726854	-0.430061	0.357051	1	0.137875	0.142466	0.685438	-0.34229	0.676992	1	-0.122208	0.00864135	0.258019	-0.484377	0.55156	0.923051	-0.114285
29657	ARNTL	aryl hydrocarbon receptor nuclear translocator-like	0.810685	1	-0.0649659	0.0402918	0.312463	-0.546823	0.296369	0.699583	-0.160935	0.013587	0.148134	-0.438292	0.585377	1	0.139979	0.634883	1	-0.158762	0.658871	1	-0.0829385	0.472069	1	-0.1965	0.970603	1	0.0109873	0.00969835	0.247105	-0.549342
362464	Arntl2	aryl hydrocarbon receptor nuclear translocator-like 2	0.774883	1	-0.146708	0.114749	0.420119	0.683768	0.507788	0.877376	-0.122974	0.0247904	0.207033	0.672421	0.974152	1	0.0616273	0.779294	1	0.0425325	0.614342	0.993346	-0.160865	0.0717517	0.752639	0.642936	0.868718	1	-0.00629184	0.507433	0.901441	0.27915
81824	Arpc1a	actin related protein 2/3 complex, subunit 1A	0.577962	0.953287	0.0665667	0.0249517	0.284422	0.497397	0.698205	1	0.0360614	0.10864	0.436355	0.33391	0.622629	1	0.0257666	0.391553	1	0.220258	0.84833	1	0.0219371	0.781232	1	0.076456	0.453134	0.904976	0.0652389	0.00402326	0.190303	0.605664
54227	ARPC1B	actin related protein 2/3 complex, subunit 1B, 41kDa	0.451674	0.856454	0.168035	0.0668943	0.349504	0.590567	0.133816	0.515002	0.219361	0.0102505	0.126132	0.612871	0.954564	1	0.0136838	0.991717	1	0.0325035	0.268521	0.793496	0.177611	0.488799	1	0.238054	0.620293	1	0.0681058	0.0521659	0.413395	0.567638
301511	ARPC2	actin related protein 2/3 complex, subunit 2, 34kDa	0.986037	1	-0.00174414	0.0266312	0.286763	0.253275	0.490936	0.866397	0.0517724	0.019369	0.181124	0.282218	0.471569	0.971953	-0.06834	0.92612	1	0.00886323	0.366484	0.864915	0.0704036	0.291411	0.919676	0.16707	0.347952	0.824837	-0.0776703	0.229289	0.66846	0.183232
288669	ARPC3	actin related protein 2/3 complex, subunit 3, 21kDa	0.626937	0.989502	0.102075	0.0237024	0.282399	0.536357	0.569518	0.922298	0.0911138	0.0805865	0.380268	0.406208	0.772861	1	-0.00501388	0.4546	1	0.213247	0.504349	0.952018	0.104386	0.583977	1	0.155049	0.810021	1	0.0263894	0.0157233	0.287613	0.587793
297518	Arpc4	actin related protein 2/3 complex, subunit 4	0.370398	0.83352	0.300353	0.0357366	0.303379	0.149797	0.117058	0.48654	0.323839	0.184243	0.5626	0.310122	0.761672	1	0.0758701	0.481362	1	-0.126711	0.207736	0.748449	0.29031	0.907367	1	-0.000708832	0.470774	0.919169	0.143279	0.4369	0.845788	0.211643
360854	ARPC5	actin related protein 2/3 complex, subunit 5, 16kDa	0.144842	0.667257	0.158151	0.0127754	0.25227	0.333318	0.856346	1	0.0443663	0.0257054	0.211268	0.239845	0.0197589	0.721469	0.18751	0.159961	1	0.160774	0.449141	0.919845	0.0870644	0.0451855	0.750579	0.223798	0.132272	0.564287	0.148379	0.0458107	0.393224	0.243059
296710	Arpc5l	actin related protein 2/3 complex, subunit 5-like	0.859695	1	0.0298195	0.255867	0.576149	0.737151	0.844695	1	0.0311539	0.280048	0.67957	0.387967	0.826503	1	0.0172316	0.349418	1	0.404636	0.646248	1	0.0517777	0.76349	1	0.149986	0.987554	1	-0.00582974	0.0346551	0.363473	0.851366
60336	Arpp19	cAMP-regulated phosphoprotein 19	0.362152	0.83352	0.166269	0.481143	0.762912	0.299223	0.295813	0.699262	0.228598	0.157495	0.520198	0.403066	0.975241	1	-0.0173617	0.648155	1	-0.0893844	0.262215	0.787987	0.243609	0.865011	1	0.118154	0.950176	1	-0.00692699	0.397606	0.819358	0.285629
363153	ARPP21	cAMP-regulated phosphoprotein, 21kDa	0.422647	0.83352	-0.534292	0.185318	0.506891	-0.348933	0.48965	0.865646	-0.303228	0.00953002	0.121112	-0.435973	0.269961	0.866127	-0.49821	0.822739	1	0.0870397	0.303959	0.821393	-0.447079	0.192185	0.850378	-0.290649	0.373518	0.841403	-0.354359	0.554505	0.923051	-0.174596
171107	ARR3	arrestin 3, retinal (X-arrestin)	0.729534	1	-0.0550077	0.315224	0.64414	0.277326	0.359386	0.766387	0.105572	0.360936	0.752595	0.201306	0.122568	0.779366	-0.185736	0.630067	1	0.168132	0.991963	1	-0.00134767	0.922438	1	0.00212266	0.592152	0.980085	-0.0803814	0.0774219	0.461819	0.398349
25387	ARRB1	arrestin, beta 1	0.304693	0.794709	-0.326992	0.0987798	0.399008	0.832812	0.470037	0.849266	-0.144396	0.42481	0.793084	0.489671	0.256871	0.857711	-0.256815	0.34305	1	0.437327	0.44542	0.917354	-0.205451	0.0830501	0.752639	0.919403	0.258134	0.727342	-0.255278	0.785972	1	0.222408
25388	ARRB2	arrestin, beta 2	0.146156	0.668701	0.0976192	0.80598	1	0.123487	0.933536	1	0.0291433	0.603216	0.937296	-0.105245	0.389188	0.95593	0.0873932	0.346091	1	0.207678	0.63398	1	0.0740884	0.736419	1	-0.155281	0.620919	1	0.0623763	0.422417	0.834585	0.312912
366001	ARRDC1	arrestin domain containing 1	0.64031	1	0.0847748	0.136151	0.449179	0.273529	0.288784	0.691215	0.164401	0.356573	0.748114	0.264296	0.768291	1	-0.078563	0.646931	1	0.0916023	0.343151	0.852131	0.150144	0.941183	1	0.00809536	0.870715	1	-0.0367567	0.114943	0.510947	0.384067
306344	Arrdc2	arrestin domain containing 2	0.956805	1	0.0062922	0.123627	0.434095	-0.499501	0.277878	0.676894	-0.151147	0.0746572	0.367851	-0.347905	0.256175	0.857365	0.185397	0.415127	1	-0.20085	0.819024	1	-0.0438297	0.201322	0.857082	-0.309264	0.783722	1	0.0615385	0.107161	0.495774	-0.373155
309945	ARRDC3	arrestin domain containing 3	0.102161	0.635832	0.810982	0.0421183	0.314175	0.785359	0.365322	0.772466	0.443695	0.493843	0.848355	0.436546	0.076469	0.7404	0.75746	0.282732	1	0.487788	0.336471	0.845888	0.382428	0.119669	0.76771	0.786448	0.049567	0.411367	0.82894	0.671913	0.991555	0.307022
293019	Arrdc4	arrestin domain containing 4	0.0484957	0.577136	-0.581727	0.113752	0.418635	0.409479	0.0186277	0.23326	-1.20072	0.253172	0.649276	-0.381708	0.3773	0.946585	0.43524	0.0107992	1	0.861643	0.112671	0.673968	-1.0444	0.652529	1	0.173679	0.834581	1	0.207518	0.4467	0.853931	0.395779
680452	ARRDC5	arrestin domain containing 5	1	1	0	1	1	0	1	1	0	0.395772	0.764011	-0.0834491	1	1	0	0.395772	1	0.0834491	1	1	0	0.572368	1	-0.0556327	1	1	0	0.572368	0.923051	0.0556327
315222	ARSA	arylsulfatase A	0.0978933	0.629522	0.152603	0.495457	0.777459	-0.0479152	0.00375332	0.12245	0.164368	0.926807	1	-0.0101198	0.667972	1	0.049334	0.642878	1	-0.0644313	0.0821298	0.646725	0.128647	0.280402	0.91357	-0.10761	0.182334	0.626191	0.0951896	0.672529	0.991934	0.0348443
25227	ARSB	arylsulfatase B	0.890487	1	-0.0316152	0.261503	0.582926	0.259963	0.684977	1	0.0331322	0.547197	0.892992	0.0624726	0.489889	0.983967	-0.118845	0.165952	1	0.18532	0.925399	1	0.0114608	0.637387	1	0.0837588	0.69798	1	-0.0716468	0.0824045	0.471342	0.258802
310326	ARSE	arylsulfatase E (chondrodysplasia punctata 1)	0.172622	0.696694	0.287314	0.0314688	0.295495	-0.532202	0.0240474	0.259358	0.38652	0.244605	0.641476	-0.299441	0.94459	1	-0.046098	0.156502	1	-0.32396	0.134285	0.680364	0.312851	0.0247249	0.74747	-0.494581	0.660408	1	0.0879373	0.427789	0.837552	-0.245422
303631	ARSG	arylsulfatase G	0.219527	0.7253	-0.14636	0.0591385	0.338722	-0.400035	0.876394	1	-0.00513086	0.163704	0.530519	-0.245508	0.205042	0.825063	-0.200439	0.369745	1	-0.238105	0.645177	1	0.0554967	0.870517	1	-0.057751	0.0357521	0.372186	-0.27038	0.00297376	0.175216	-0.503488
307404	ARSI	arylsulfatase family, member I	0.17313	0.696844	0.114192	0.136232	0.449264	-0.608709	0.788132	1	0.0201711	0.101223	0.425778	-0.417796	0.521516	1	0.116773	0.19719	1	-0.378896	0.799618	1	-0.042589	0.0992865	0.752639	-0.437122	0.194307	0.645389	0.202429	0.0945289	0.490651	-0.437151
311013	ARSJ	arylsulfatase family, member J	0.343647	0.830696	-0.384519	0.721281	0.986698	0.158957	0.776224	1	-0.106922	0.985088	1	-0.0258645	0.0674095	0.739543	-0.4053	0.484328	1	0.0857466	0.671282	1	-0.106979	0.355974	0.959297	0.240319	0.0535	0.423059	-0.44828	0.878228	1	-0.0614019
365619	ARSK	arylsulfatase family, member K	0.326785	0.814332	-0.195615	0.535352	0.815915	-0.0736515	0.676099	1	-0.0753954	0.360111	0.751832	-0.149919	0.220945	0.842836	-0.182376	0.6165	1	0.0805949	0.980947	1	-0.00940785	0.538974	1	0.115388	0.0667872	0.454394	-0.272131	0.277957	0.713107	-0.212147
308873	ART1	ADP-ribosyltransferase 1	0.202805	0.709192	0.448974	1	1	0	0.171374	0.56313	0.326581	0.304546	0.693557	0.102558	0.106649	0.765689	0.34688	0.304546	1	-0.102558	0.115999	0.677548	0.326581	0.572368	1	-0.0683723	0.103492	0.52533	0.34688	0.572368	0.923051	0.0683723
293152	Art2b	ADP-ribosyltransferase 2b	0.42265	0.83352	0.0898006	0.863908	1	-0.0587882	0.163118	0.552435	0.166324	0.407245	0.77499	-0.257912	0.503503	0.993499	-0.0765232	0.550041	1	0.0784525	0.469247	0.933016	0.128611	0.810827	1	-0.090462	0.998475	1	-0.00887659	0.996433	1	-0.0281461
305235	ART3	ADP-ribosyltransferase 3	0.76876	1	0.0551792	0.203779	0.522059	-0.380666	0.40045	0.805731	0.0951357	0.827567	1	-0.076959	0.793316	1	-0.000483704	0.00500674	1	-0.387179	0.984885	1	0.021286	0.344033	0.950814	-0.179537	0.554081	0.955738	0.0654439	0.0377599	0.373433	-0.355842
312806	ART4	ADP-ribosyltransferase 4 (Dombrock blood group)	0.0310419	0.540742	-0.561296	0.600806	0.879241	0.135157	0.375578	0.784881	-0.251752	0.403951	0.77174	-0.154917	0.0502483	0.721469	-0.500372	0.153466	1	0.296067	0.151846	0.694584	-0.396086	0.840623	1	0.0312425	0.143663	0.576921	-0.415918	0.671686	0.991401	0.150964
259167	ART5	ADP-ribosyltransferase 5	0.422647	0.83352	-0.179639	0.18352	0.50555	0.367595	0.261325	0.657754	-0.215147	0.113381	0.445436	0.183797	0.962029	1	0.0355081	0.195756	1	0.183797	0.37337	0.868437	-0.185207	0.00644664	0.74747	0.367595	0.731608	1	-0.0543112	0.395789	0.819358	0.122532
362572	ARTN	artemin	0.89567	1	0.0381423	0.106817	0.409617	0.251574	0.655554	0.988673	0.0273886	0.185847	0.565377	0.223568	0.886676	1	-0.0691178	0.978797	1	0.0869924	0.801225	1	0.041186	0.94715	1	0.00145396	0.943513	1	-0.0169535	0.102162	0.494263	0.353641
292097	ARV1	ARV1 homolog (S. cerevisiae)	0.349753	0.83352	-0.106777	0.841006	1	0.0388926	0.33013	0.736945	-0.0816478	0.518053	0.868478	0.14727	0.652653	1	-0.0634514	0.62821	1	-0.0346362	0.690212	1	-0.0365913	0.493309	1	-0.155288	0.265684	0.737571	-0.118552	0.38437	0.812901	0.231725
303798	ARVCF	armadillo repeat gene deleted in velocardiofacial syndrome	0.350868	0.83352	-0.159748	0.0203752	0.272149	-0.235697	0.419503	0.822963	-0.0763105	0.0626564	0.338371	-0.371233	0.346351	0.923219	-0.127895	0.754433	1	0.0890205	0.901924	1	-0.0170813	0.0488091	0.750579	-0.405184	0.0610853	0.442674	-0.210735	0.672445	0.991934	0.0754164
317268	ARX	aristaless related homeobox	0.0630184	0.603701	-0.531688	0.080611	0.372741	-0.773717	0.10496	0.46746	-0.345557	0.119532	0.456091	-0.407921	0.157258	0.798482	-0.367061	0.0237065	1	-0.540179	0.349614	0.857974	-0.237361	0.103881	0.752639	-0.427965	0.00695184	0.2407	-0.531867	0.00205384	0.163008	-0.661785
140925	AS3MT	arsenic (+3 oxidation state) methyltransferase	0.108023	0.643195	-0.254563	0.0584285	0.337984	-0.630694	0.050254	0.350135	-0.178438	0.00459645	0.0805325	-0.622303	0.12338	0.779366	-0.147026	0.617251	1	-0.0999406	0.00802026	0.612323	-0.230418	0.0144936	0.74747	-0.612839	0.191453	0.640435	-0.132633	0.411688	0.826885	-0.258602
84431	ASAH1	N-acylsphingosine amidohydrolase (acid ceramidase) 1	0.651415	1	-0.0446573	0.614122	0.891086	-0.0845456	0.585214	0.934126	0.0288841	0.619452	0.949785	0.0835527	0.234837	0.854629	-0.0798016	0.310597	1	-0.161304	0.75063	1	0.0369448	0.34107	0.948632	0.201561	0.32332	0.802118	-0.0985745	0.115082	0.510947	-0.312024
114104	ASAH2	N-acylsphingosine amidohydrolase (non-lysosomal ceramidase) 2	0.949534	1	0.0197149	0.211996	0.528838	-0.226622	0.983015	1	-0.0172469	0.222627	0.611112	-0.297029	0.945461	1	0.0908827	0.67527	1	0.072262	0.722888	1	-0.110481	0.918543	1	-0.00710232	0.650843	1	0.154741	0.325613	0.759132	-0.294442
314961	ASAP1	ArfGAP with SH3 domain, ankyrin repeat and PH domain 1	0.58523	0.958513	0.143498	0.285056	0.608793	0.194211	0.452093	0.834589	0.0775302	0.671174	0.986622	-0.0971086	0.687005	1	0.0589562	0.305966	1	0.279511	0.760076	1	0.0327036	0.356994	0.960224	0.322592	0.357106	0.834001	0.156289	0.795677	1	-0.0675797
316628	ASB1	ankyrin repeat and SOCS box containing 1	0.372755	0.83352	0.270679	0.651231	0.925207	0.0751839	0.0711719	0.397396	0.265435	0.508073	0.859349	0.199309	0.680992	1	0.0597503	0.74499	1	-0.154019	0.273569	0.798811	0.192252	0.284992	0.915344	0.284815	0.302615	0.780641	0.186822	0.478077	0.881208	-0.194534
499972	Asb10	ankyrin repeat and SOCS box-containing 10	0.986317	1	-0.00485056	0.422647	0.708159	-0.186123	0.796123	1	0.0849688	0.935347	1	-0.0057169	0.766871	1	-0.00242528	0.113621	1	-0.180406	0.56441	0.960564	0.114909	0.396075	0.979785	-0.120271	0.536662	0.953214	-0.0922446	0.450882	0.858222	-0.127893
302666	ASB11	ankyrin repeat and SOCS box containing 11	0.557784	0.938735	-0.273813	0.304725	0.631783	0.384804	0.992825	1	-0.0344774	0.0285247	0.22305	0.575168	0.275179	0.869341	-0.199559	0.531195	1	-0.101455	0.343253	0.852131	-0.262686	0.253608	0.895007	0.432698	0.828049	1	-0.0891392	0.699976	1	0.11001
503446	ASB12	ankyrin repeat and SOCS box containing 12	1	1	0	1	1	0	0.45421	0.834589	-0.118618	1	1	0	0.45421	0.962785	0.118618	1	1	0	0.550415	0.952018	-0.0790789	1	1	0	0.550415	0.953214	0.0790789	1	1	0
361268	ASB13	ankyrin repeat and SOCS box containing 13	0.475744	0.875694	-0.243476	0.189511	0.511228	-0.273467	0.558384	0.915021	-0.138154	0.290393	0.691673	-0.47432	0.42256	0.962785	-0.176939	0.608579	1	0.130499	0.642316	1	-0.13274	0.729271	1	0.145319	0.32356	0.802118	-0.215767	0.343347	0.776624	-0.533393
680076	ASB14	ankyrin repeat and SOCS box containing 14	0.732882	1	-0.0681443	0.732486	0.997618	-0.0748388	0.248683	0.650829	-0.274865	0.178303	0.555119	0.240435	0.4298	0.962785	0.240962	0.0505314	1	-0.268868	0.39113	0.881426	-0.242744	0.993586	1	0.0136487	0.637823	1	0.163299	0.616103	0.954063	-0.097965
498005	ASB16	ankyrin repeat and SOCS box containing 16	0.683188	1	0.203766	0.981902	1	0.00819859	0.697095	1	0.217455	0.966086	1	0.0640925	0.600188	1	0.242034	0.93156	1	0.0691457	0.801945	1	0.0944617	0.926841	1	0.0143356	0.465348	0.916383	0.262467	0.888873	1	0.0382757
687364	ASB17	ankyrin repeat and SOCS box containing 17	1	1	0	1	1	0	1	1	0	0.304546	0.693557	0.0873447	1	1	0	0.304546	1	-0.0873447	1	1	0	0.572368	1	-0.0582298	1	1	0	0.572368	0.923051	0.0582298
316614	ASB18	ankyrin repeat and SOCS box containing 18	1	1	0	1	1	0	1	1	0	1	1	0	1	1	0	1	1	0	1	1	0	1	1	0	1	1	0	1	1	0
299266	ASB2	ankyrin repeat and SOCS box containing 2	0.914262	1	0.0378118	0.503505	0.785776	-0.243169	0.486008	0.86162	0.153754	0.723891	1	-0.0246887	0.618315	1	-0.215385	0.621436	1	-0.196976	0.60037	0.984943	0.132642	0.422815	0.986362	-0.256105	0.753136	1	-0.115374	0.878494	1	-0.0609529
364227	Asb3	ankyrin repeat and SOCS box-containing 3	0.0892692	0.624564	-0.496213	0.12158	0.431491	-0.281763	0.00264112	0.108633	-0.600228	0.0857487	0.392977	-0.322614	0.975215	1	-0.0238927	0.866991	1	0.00968295	0.0404574	0.612323	-0.532191	0.92577	1	-0.0490586	0.471623	0.919355	-0.172062	0.108106	0.496561	-0.337015
500017	ASB4	ankyrin repeat and SOCS box containing 4	0.0907614	0.626221	0.829122	0.755719	1	0.133054	0.023375	0.25615	0.601016	0.704041	1	-0.0288763	0.18963	0.817027	0.456994	0.444423	1	0.295705	0.0518972	0.618368	0.601529	0.960034	1	0.00225365	0.0753067	0.471671	0.580263	0.703044	1	0.219743
361187	ASB5	ankyrin repeat and SOCS box containing 5	0.538271	0.925348	-0.0608614	0.58244	0.861544	-0.118887	0.715853	1	-0.0333067	0.958541	1	0.0143929	0.704394	1	-0.0222839	0.4127	1	-0.0753648	0.502988	0.952018	-0.0711037	0.352801	0.958967	-0.129664	0.898338	1	-0.008288	0.960895	1	-0.00954697
296627	ASB6	ankyrin repeat and SOCS box containing 6	0.322914	0.810788	-0.102039	0.400196	0.708159	-0.140665	0.744099	1	-0.0310661	0.665335	0.982796	-0.0682164	0.302184	0.89297	-0.12994	0.229453	1	-0.129923	0.711009	1	0.0287276	0.101667	0.752639	-0.166013	0.0441292	0.396164	-0.184436	0.792899	1	-0.0406991
365277	ASB7	ankyrin repeat and SOCS box containing 7	0.15709	0.675568	-0.28787	0.092538	0.389887	-0.226281	0.0373692	0.310326	-0.357309	0.539159	0.886967	-0.185335	0.872703	1	-0.0477479	0.856858	1	-0.1006	0.047662	0.612323	-0.347031	0.884018	1	0.0160427	0.656337	1	-0.075858	0.291862	0.724953	-0.337635
315287	ASB8	ankyrin repeat and SOCS box containing 8	0.0322203	0.542843	-0.29568	0.718504	0.984244	0.0519776	0.00190307	0.0935518	-0.257282	0.922313	1	-0.0140295	0.296022	0.889038	-0.132722	0.676795	1	0.0804681	0.0215506	0.612323	-0.23486	0.433613	0.989472	-0.0851144	0.0844144	0.494001	-0.190821	0.166837	0.591488	0.159238
367785	ASB9	ankyrin repeat and SOCS box containing 9	0.111047	0.644353	0.354736	0.0729844	0.358605	-0.622633	0.392614	0.79998	0.159226	0.0180852	0.174148	-0.591618	0.0653485	0.739543	0.314163	0.474998	1	-0.1897	0.599398	0.984679	0.122533	0.0116637	0.74747	-0.628274	0.0117427	0.273111	0.39	0.442791	0.849718	-0.254798
294512	ASCC1	activating signal cointegrator 1 complex subunit 1	0.116454	0.650445	-0.207887	0.939549	1	0.00765735	0.109025	0.473645	-0.178254	0.661615	0.979604	0.0793624	0.566389	1	-0.0895267	0.696763	1	-0.0558833	0.198775	0.739204	-0.163703	0.657502	1	-0.0733003	0.387763	0.852407	-0.133444	0.619048	0.954999	0.088784
498402	ASCC2	activating signal cointegrator 1 complex subunit 2	0.317785	0.806199	0.240541	0.162563	0.484502	0.376555	0.0592072	0.370932	0.213262	0.0204453	0.187046	0.322437	0.512087	0.999407	0.0473947	0.497482	1	0.0793453	0.0459871	0.612323	0.242567	0.0810614	0.752639	0.289121	0.557322	0.957222	0.0848594	0.22547	0.664779	0.221361
64186	ASCL1	achaete-scute complex homolog 1 (Drosophila)	0.242497	0.741902	0.302464	0.574071	0.854284	-0.191326	0.122208	0.495523	0.358912	0.243415	0.64054	0.263473	0.753272	1	0.0672977	0.0463809	1	-0.547143	0.120982	0.680364	0.349325	0.717554	1	0.150235	0.650309	1	0.0952088	0.221138	0.660329	-0.436118
24209	ASCL2	achaete-scute complex homolog 2 (Drosophila)	0.902692	1	0.0378415	0.114284	0.419813	0.424361	0.859975	1	0.0787579	0.277032	0.67659	0.21367	0.970228	1	0.0568342	0.406193	1	0.229396	0.846892	1	0.0724171	0.793951	1	0.0876759	0.973365	1	0.0106218	0.0427585	0.386327	0.484374
246301	Ascl3	achaete-scute complex homolog 3 (Drosophila)	0.381396	0.83352	-0.289911	0.87955	1	0.0385166	0.311194	0.71443	-0.22097	0.132045	0.476123	0.314147	0.458125	0.965459	-0.164304	0.196064	1	-0.235672	0.175484	0.714742	-0.282217	0.890132	1	-0.0125312	0.612124	0.994962	-0.136119	0.729304	1	0.077206
294408	ASF1A	ASF1 anti-silencing function 1 homolog A (S. cerevisiae)	0.168289	0.690061	0.204961	0.944469	1	-0.0101105	0.242243	0.649976	0.13896	0.544202	0.890366	0.0369191	0.115668	0.773697	0.160377	0.48519	1	-0.0594813	0.0349491	0.612323	0.198766	0.973888	1	-0.00610676	0.342192	0.820085	0.105973	0.947042	1	-0.0115245
304648	ASF1B	ASF1 anti-silencing function 1 homolog B (S. cerevisiae)	0.0337614	0.547641	-0.324647	0.269732	0.591669	0.335845	0.175876	0.569335	-0.300311	0.237467	0.632139	0.218307	0.566727	1	-0.127559	0.744552	1	0.0776435	0.0654211	0.62404	-0.387233	0.846496	1	-0.0574895	0.833554	1	-0.0800373	0.0387394	0.375369	0.491985
24210	ASGR1	asialoglycoprotein receptor 1	0.410525	0.83352	0.222519	0.406887	0.708159	-0.232051	0.786779	1	0.0692582	0.409426	0.776883	0.295778	0.22774	0.84682	0.254393	0.070036	1	-0.597722	0.383084	0.875863	0.168755	0.968798	1	-0.0164895	0.503272	0.945913	0.161649	0.407639	0.824476	-0.316209
29403	ASGR2	asialoglycoprotein receptor 2	0.21245	0.718288	-0.282095	0.422647	0.708159	-0.186123	0.660426	0.992861	-0.0536533	0.395772	0.764011	-0.0930616	0.156685	0.798469	-0.279669	0.304546	1	-0.0930616	0.911883	1	-0.0237135	0.572368	1	-0.0620411	0.044555	0.397524	-0.369489	0.101841	0.494263	-0.186123
310638	ASH1L	ash1 (absent, small, or homeotic)-like (Drosophila)	0.199845	0.708548	-0.262927	0.29665	0.622173	-0.167899	0.0536608	0.356136	-0.313459	0.252546	0.648839	-0.274769	0.924542	1	-0.0232761	0.604047	1	0.108451	0.218934	0.756182	-0.242304	0.579617	1	0.157589	0.424789	0.884479	-0.132868	0.207528	0.641971	-0.380928
290829	ASH2L	ash2 (absent, small, or homeotic)-like (Drosophila)	0.0447005	0.568226	-0.358976	0.216169	0.53294	-0.119936	0.00342979	0.118477	-0.326946	0.00667175	0.0995166	-0.16014	0.320241	0.905486	-0.162708	0.514352	1	0.0438856	0.0135739	0.612323	-0.307947	0.410094	0.982268	-0.0830547	0.134794	0.564287	-0.214247	0.308683	0.741323	-0.0756327
79123	ASIC1	acid-sensing (proton-gated) ion channel 1	0.577083	0.9524	-0.139632	0.380459	0.708159	-0.28959	0.809925	1	0.0631012	0.284102	0.684916	-0.20998	0.230526	0.849935	-0.225097	0.455729	1	-0.148285	0.74962	1	0.0814937	0.436696	0.991392	-0.152117	0.152966	0.58764	-0.275124	0.214381	0.649364	-0.256895
25364	ASIC2	acid-sensing (proton-gated) ion channel 2	0.155019	0.674252	0.277706	0.242235	0.561811	0.770692	0.566431	0.92089	0.123605	0.241239	0.637249	0.413727	0.0262268	0.721469	0.266829	0.10457	1	0.597688	0.156431	0.697737	0.216461	0.327569	0.945276	0.388936	0.206644	0.663488	0.191389	0.0256981	0.328064	0.718894
286920	ASIC3	acid-sensing (proton-gated) ion channel 3	0.887288	1	0.0367664	0.382989	0.708159	0.662797	0.23306	0.639948	0.345111	0.0293031	0.225934	0.862298	0.303692	0.894627	-0.353571	0.737321	1	-0.234822	0.429115	0.906228	0.278881	0.344048	0.950814	0.451013	0.531827	0.953214	-0.244935	0.371919	0.802652	0.420942
63882	ASIC4	acid-sensing (proton-gated) ion channel family member 4	0.93905	1	-0.0164728	0.277119	0.600362	-0.197968	0.360068	0.767263	-0.078606	0.0339614	0.244473	-0.247459	0.465229	0.96892	0.0711969	0.774813	1	0.0681985	0.768649	1	-0.0397565	0.136241	0.789448	-0.198305	0.914826	1	0.020814	0.707041	1	-0.0594169
63866	ASIC5	acid-sensing (proton-gated) ion channel family member 5	1	1	0	0.42265	0.708159	0.00627624	1	1	0	0.315632	0.707098	-0.122387	1	1	0	0.297831	1	0.131802	1	1	0	0.829847	1	-0.0509093	1	1	0	0.799358	1	0.0603237
24152	ASIP	agouti signaling protein	1	1	0	1	1	0	1	1	0	1	1	0	1	1	0	1	1	0	1	1	0	1	1	0	1	1	0	1	1	0
59085	ASL	argininosuccinate lyase	0.0328428	0.544257	0.411672	0.273098	0.595653	-0.192982	0.0236608	0.257143	0.29186	0.955508	1	0.00418703	0.109328	0.765689	0.268773	0.20725	1	-0.190533	0.154082	0.69536	0.235464	0.248894	0.89433	-0.211159	0.00223553	0.182712	0.363086	0.857957	1	-0.043938
246281	Asmt	acetylserotonin O-methyltransferase	0.538417	0.925348	0.30937	0.0588399	0.338414	-0.181608	0.145765	0.530728	0.470346	0.329207	0.720524	-0.141609	0.905739	1	0.0622974	0.892762	1	-0.0758245	0.190208	0.731217	0.448258	0.630213	1	-0.0993476	0.925825	1	0.0386592	0.454816	0.861778	-0.154738
288527	Asmtl	acetylserotonin O-methyltransferase-like	0.14944	0.671161	0.484318	0.767142	1	0.0842609	0.0345043	0.298885	0.537704	0.281349	0.681065	0.335635	0.805126	1	0.0983632	0.421068	1	-0.223563	0.128692	0.680364	0.456791	0.768342	1	-0.0773941	0.367694	0.837081	0.239549	0.558983	0.923051	0.199013
288919	ASNA1	arsA arsenite transporter, ATP-binding, homolog 1 (bacterial)	0.653974	1	0.0828754	0.866274	1	-0.0253329	0.179971	0.576002	0.153695	0.550536	0.895733	0.070435	0.61268	1	-0.0649376	0.441032	1	-0.0944851	0.392476	0.882676	0.127774	0.598519	1	-0.083815	0.981054	1	-0.0153126	0.736543	1	0.0504654
25612	ASNS	asparagine synthetase (glutamine-hydrolyzing)	0.791483	1	0.00707412	0.106918	0.409817	-0.253517	0.687975	1	0.0165692	0.00299395	0.0624866	-0.403162	0.79978	1	-0.0149554	0.625873	1	0.095575	0.305622	0.823536	0.0608139	0.156493	0.821461	-0.260156	0.398616	0.860073	-0.0532019	0.65289	0.976868	-0.0958895
299507	ASNSD1	asparagine synthetase domain containing 1	0.861424	1	-0.016425	0.100395	0.401608	0.266781	0.337854	0.745394	-0.0768482	0.21213	0.599238	0.129407	0.50882	0.997187	0.0466099	0.227357	1	0.167586	0.941795	1	-0.00965761	0.744088	1	0.0477798	0.834911	1	-0.0168468	0.00475491	0.197503	0.318
79251	ASPA	aspartoacylase	0.819641	1	-0.15994	0.161702	0.483525	-0.740965	0.518581	0.886334	-0.127183	0.133372	0.478939	-0.533818	0.966271	1	0.0675673	0.231221	1	-0.327819	0.712547	1	-0.0945875	0.00327289	0.74747	-0.817907	0.804474	1	-0.0852246	0.616421	0.954071	-0.21027
292875	ASPDH	aspartate dehydrogenase domain containing	0.0298921	0.540742	0.669846	0.419678	0.708159	-0.267136	0.0291835	0.279466	0.457214	0.0944812	0.412251	-0.55031	0.0347442	0.721469	0.44607	0.638575	1	0.197403	0.00454504	0.612323	0.535897	0.107622	0.753165	-0.521478	0.0455521	0.400002	0.435044	0.616411	0.954071	0.136706
246266	ASPG	asparaginase homolog (S. cerevisiae)	0.0522675	0.588393	0.639831	0.0577023	0.335382	0.762733	0.125966	0.503803	0.380869	0.063122	0.339535	0.758564	0.103951	0.763178	0.516999	0.705654	1	0.075382	0.210387	0.750989	0.355943	0.180216	0.838773	0.60683	0.0250468	0.333701	0.583178	0.36648	0.798005	0.433885
364948	ASPHD2	aspartate beta-hydroxylase domain containing 2	0.150237	0.671355	0.437284	0.236896	0.556077	0.658052	0.145911	0.530728	0.323569	0.531443	0.880307	0.194573	0.118467	0.775681	0.319704	0.149381	1	0.437725	0.136211	0.680567	0.314038	0.908289	1	0.0376555	0.0796261	0.483948	0.337671	0.0147965	0.282069	0.831162
289054	ASPM	asp (abnormal spindle) homolog, microcephaly associated (Drosophila)	0.129327	0.656564	-0.354	0.302418	0.629069	0.217524	0.111848	0.477506	-0.393681	0.813072	1	-0.00421309	0.805897	1	-0.0495223	0.198369	1	0.288974	0.0107567	0.612323	-0.543192	0.250368	0.894654	0.273343	0.932582	1	0.0414575	0.995688	1	0.0391007
306805	ASPN	asporin	0.707936	1	-0.135811	0.241868	0.561269	0.748221	0.309519	0.7129	-0.352159	0.451168	0.813488	0.262073	0.667777	1	0.20819	0.0903399	1	0.506691	0.317951	0.833417	-0.314287	0.218979	0.871975	0.444445	0.707101	1	0.130485	0.131532	0.539758	0.560031
246307	ASRGL1	asparaginase like 1	0.451355	0.856348	-0.0357707	0.77798	1	0.0194867	0.783539	1	0.020394	0.205333	0.593168	-0.188531	0.337208	0.916331	-0.0650771	0.158915	1	0.196032	0.949628	1	0.0149515	0.312084	0.935623	-0.205847	0.41219	0.872109	-0.0656166	0.244919	0.685394	0.227834
25698	ASS1	argininosuccinate synthase 1	0.0173167	0.509491	1.4167	0.152927	0.471973	0.696236	0.00431946	0.128872	1.06898	0.0120763	0.138305	1.48233	0.0867212	0.745956	0.866524	0.295324	1	-0.719948	0.0135322	0.612323	1.04407	0.123569	0.770826	1.08005	0.0150362	0.287913	1.0178	0.852317	1	-0.129687
363130	Aste1	asteroid homolog 1 (Drosophila)	0.181578	0.69949	0.392357	0.391617	0.708159	0.390022	0.0629321	0.380842	0.29922	0.118128	0.453395	0.321287	0.314839	0.903538	0.251298	0.680944	1	0.0256261	0.279825	0.803865	0.231306	0.419463	0.984761	0.192372	0.0433543	0.395037	0.344557	0.200149	0.631444	0.313288
296129	ASTL	astacin-like metallo-endopeptidase (M12 family)	1	1	0	1	1	0	0.45421	0.834589	-0.125327	1	1	0	0.45421	0.962785	0.125327	1	1	0	0.536795	0.952018	-0.125327	1	1	0	0.536795	0.953214	0.125327	1	1	0
304900	ASTN1	astrotactin 1	0.230113	0.734413	-0.215541	0.0116744	0.248824	-1.36835	0.0986553	0.455065	-0.199251	3.0197e-05	0.00711931	-1.6817	0.552278	1	-0.133149	0.888201	1	0.0422686	0.381118	0.874535	-0.14099	0.0545277	0.751369	-1.20031	0.133892	0.564287	-0.185351	0.303341	0.736714	-0.714516
100361323	ASTN2	astrotactin 2	0.547419	0.931789	0.125192	0.0228945	0.281511	1.31421	0.258602	0.65565	0.139155	0.000831575	0.0322005	0.982503	0.823801	1	0.0682467	0.191961	1	0.494526	0.446395	0.917621	0.101391	0.022759	0.74747	0.863626	0.532184	0.953214	0.0929351	0.0163658	0.289575	0.942926
690728	ASUN	asunder, spermatogenesis regulator	0.163177	0.682777	0.34826	0.0855542	0.380712	0.302884	0.938373	1	0.0531286	0.648833	0.97131	0.0969928	0.0217504	0.721469	0.478705	0.0242676	1	0.283283	0.660834	1	0.0940668	0.177242	0.83688	0.182039	0.049002	0.409807	0.431471	0.111182	0.50277	0.247604
170578	ASZ1	ankyrin repeat, SAM and basic leucine zipper domain containing 1	0.422648	0.83352	0.269439	0.422647	0.708159	-0.171541	0.906518	1	-0.0414026	0.756594	1	0.0222141	0.137509	0.785653	0.310842	0.223859	1	-0.279526	0.614102	0.993247	0.093317	0.167671	0.830528	-0.314343	0.244015	0.707813	0.265935	0.724195	1	0.0570317
309532	ATAD1	ATPase family, AAA domain containing 1	0.14757	0.670277	-0.195773	0.524208	0.805564	-0.0945105	0.113694	0.481861	-0.148227	0.488149	0.844405	-0.087253	0.374063	0.943461	-0.100567	0.947047	1	-0.0039395	0.383132	0.875863	-0.107345	0.624599	1	0.0632865	0.0720756	0.46671	-0.17136	0.165408	0.589803	-0.188194
314993	ATAD2	ATPase family, AAA domain containing 2	0.701886	1	-0.0586256	0.54335	0.824487	-0.100096	0.152816	0.540265	-0.233499	0.284422	0.685398	-0.266165	0.310295	0.899199	0.208619	0.509865	1	0.14508	0.405465	0.890909	-0.1858	0.771251	1	0.0476519	0.6899	1	0.118882	0.46194	0.86888	-0.188109
298682	ATAD3A/ATAD3B	ATPase family, AAA domain containing 3A	0.79408	1	0.0295766	0.0549347	0.330579	0.482634	0.178049	0.572866	0.123428	0.00227584	0.0543585	0.523535	0.320065	0.905467	-0.12738	0.830082	1	0.0206803	0.503022	0.952018	0.0930263	0.258588	0.896761	0.266324	0.745487	1	-0.0647672	0.104515	0.494263	0.397716
361789	ATAT1	alpha tubulin acetyltransferase 1	0.375739	0.83352	-0.344752	0.214882	0.531124	-0.378737	0.504213	0.875305	-0.193629	0.453853	0.815375	-0.125003	0.0940936	0.750041	-0.366607	0.0151737	1	-0.35509	0.244087	0.772776	-0.256023	0.135269	0.787139	-0.267473	0.218217	0.678801	-0.275474	0.0988971	0.494263	-0.271296
362826	ATCAY	ataxia, cerebellar, Cayman type	0.180673	0.69949	0.375794	0.933799	1	-0.038842	0.0642396	0.383995	0.465249	0.795768	1	0.12408	0.950513	1	0.0535426	0.670877	1	-0.0106082	0.260247	0.785961	0.346596	0.830114	1	-0.000811928	0.508434	0.949723	0.202129	0.976014	1	-0.000206147
293526	ATE1	arginyltransferase 1	0.562468	0.942057	-0.115011	0.3013	0.62785	0.784643	0.241149	0.648573	-0.128971	0.354738	0.747109	0.335407	0.886269	1	-0.0180012	0.16083	1	0.462351	0.524776	0.952018	-0.0852153	0.259506	0.897658	0.439443	0.463536	0.915142	-0.0787867	0.129655	0.536497	0.611119
315305	ATF1	activating transcription factor 1	0.311623	0.799829	-0.0917084	0.62304	0.89888	-0.0768969	0.0625921	0.379987	-0.137188	0.452418	0.814236	-0.0530724	0.608841	1	0.0467082	0.884816	1	-0.00686488	0.347246	0.854567	-0.100343	0.840509	1	0.015742	0.688903	1	-0.0215253	0.217128	0.653765	-0.112618
81647	ATF2	activating transcription factor 2	0.390825	0.83352	-0.150423	0.545849	0.827103	0.0662261	0.257742	0.654799	-0.140211	0.919411	1	0.0450468	0.725074	1	-0.0450835	0.797519	1	0.0261409	0.600507	0.984943	-0.0847154	0.317878	0.939793	0.451002	0.295629	0.77203	-0.127472	0.414814	0.82807	-0.361047
25389	ATF3	activating transcription factor 3	0.00189653	0.452792	1.29906	0.0143403	0.252542	2.54093	0.00056097	0.065885	1.10591	3.97759e-05	0.00804993	2.23934	0.250679	0.857365	0.610886	0.459228	1	0.798107	0.0456264	0.612323	0.92451	0.0438014	0.750579	1.76822	0.0354167	0.371233	0.94682	0.0277308	0.338963	1.7852
79255	ATF4	activating transcription factor 4 (tax-responsive enhancer element B67)	0.0079186	0.471776	0.448441	0.0195799	0.268549	0.539142	0.0146647	0.211286	0.312203	0.114636	0.447137	0.286992	0.0886948	0.746732	0.295247	0.185115	1	0.325925	0.104082	0.665241	0.269361	0.580633	1	0.150335	0.00207344	0.182712	0.381563	0.000907034	0.113579	0.593113
282840	ATF5	activating transcription factor 5	0.238846	0.739969	0.543545	0.210454	0.527284	-0.10816	0.0762621	0.408033	0.446247	0.410999	0.778479	-0.321242	0.252468	0.857365	0.304812	0.656296	1	0.180962	0.0479174	0.612323	0.480796	0.288138	0.91651	-0.383638	0.223596	0.687149	0.313102	0.512135	0.904831	0.228718
304962	ATF6	activating transcription factor 6	0.214137	0.718847	0.126545	0.0178958	0.264422	0.525696	0.669968	1	0.05563	0.598551	0.93357	0.384267	0.43101	0.962785	0.109031	0.529586	1	0.223619	0.570114	0.96425	0.0736131	0.120195	0.76771	0.797188	0.470682	0.919127	0.107818	0.816174	1	-0.0688635
406169	ATF6B	activating transcription factor 6 beta	0.958419	1	0.00859712	0.313579	0.641857	-0.215128	0.294835	0.698046	0.262648	0.463414	0.823098	0.146912	0.315995	0.903538	-0.265921	0.0374742	1	-0.419742	0.430071	0.906561	0.236944	0.959019	1	-0.0106323	0.459961	0.911531	-0.229438	0.198024	0.628234	-0.295439
315333	ATF7	activating transcription factor 7	0.852701	1	0.0664018	0.546607	0.827736	-0.0540147	0.710436	1	-0.0344767	0.640369	0.965087	-0.101622	0.398149	0.959676	0.156991	0.749684	1	0.0354683	0.855682	1	0.0278337	0.342079	0.949787	0.367747	0.756871	1	0.0794061	0.259881	0.700013	-0.443813
497859	ATF7IP2	activating transcription factor 7 interacting protein 2	0.635746	0.996206	0.0750889	0.232258	0.550914	-0.408045	0.335648	0.743313	0.121704	0.0283587	0.222147	-0.456337	0.837054	1	-0.0592291	0.842363	1	-0.104986	0.400459	0.888459	0.104576	0.107232	0.753165	-0.379564	0.890341	1	-0.00866168	0.45974	0.866945	-0.215588
688555	ATG10	autophagy related 10	0.340464	0.827332	-0.368614	0.00266436	0.221049	-0.272152	0.217331	0.621324	-0.28102	0.443519	0.806825	-0.106973	0.310174	0.899109	-0.180742	0.0724531	1	-0.205851	0.239448	0.770787	-0.258676	0.397426	0.979785	-0.101812	0.238632	0.703015	-0.263859	0.0212317	0.31321	-0.274615
361321	ATG12	autophagy related 12	0.205447	0.711373	0.304103	0.184115	0.50555	0.432283	0.899133	1	0.00485641	0.0864427	0.395094	0.299103	0.0350509	0.721469	0.468434	0.23235	1	0.253856	0.887778	1	0.0276125	0.0958484	0.752639	0.307597	0.0576387	0.434219	0.434254	0.10612	0.494263	0.309006
362164	ATG13	autophagy related 13	0.734043	1	0.0719215	0.0121325	0.248824	-0.256531	0.463954	0.842789	-0.0946571	0.142132	0.494384	-0.302934	0.15389	0.794983	0.195846	0.711036	1	0.00876704	0.638223	1	-0.0813192	0.76548	1	0.0530328	0.224748	0.688811	0.18697	0.120407	0.519518	-0.407619
305831	ATG14	autophagy related 14	0.108826	0.644353	-0.37945	0.178992	0.504709	-0.345126	0.00446342	0.129992	-0.496732	0.0204168	0.186935	-0.284089	0.810712	1	0.036388	0.777854	1	-0.06299	0.0423792	0.612323	-0.466728	0.461664	1	-0.139927	0.695185	1	-0.0661697	0.0387712	0.375369	-0.320891
363278	ATG16L1	autophagy related 16-like 1 (S. cerevisiae)	0.00929922	0.471776	0.322839	0.069114	0.353287	0.304938	0.0419078	0.326482	0.2077	0.168887	0.538404	0.195489	0.0718452	0.739543	0.212348	0.209026	1	0.176656	0.15616	0.697609	0.171159	0.594178	1	0.0716244	0.00100419	0.146927	0.291696	0.00259126	0.17022	0.357363
308865	ATG16L2	autophagy related 16-like 2 (S. cerevisiae)	0.472317	0.873539	0.270356	0.113629	0.41831	0.135638	0.0614779	0.377138	0.385075	0.667244	0.984203	-0.0316585	0.805802	1	-0.126384	0.154988	1	0.19443	0.184036	0.724037	0.33056	0.631501	1	-0.0953269	0.8798	1	0.0260266	0.0770548	0.460784	0.285222
689688	ATG2A	autophagy related 2A	0.37405	0.83352	0.232295	0.014544	0.252542	-0.194908	0.0687112	0.392669	0.280543	0.122276	0.46009	-0.140285	0.982803	1	-0.0324975	0.756301	1	-0.0946496	0.243659	0.772776	0.217142	0.682423	1	-0.0642946	0.577512	0.972453	0.0978356	0.092929	0.488383	-0.208925
171415	ATG3	autophagy related 3	0.527311	0.916712	-0.0614284	0.0610215	0.342089	0.258871	0.893524	1	0.0297514	0.0101974	0.126025	0.313423	0.344414	0.921487	-0.0879861	0.799552	1	-0.0318641	0.956489	1	0.00992576	0.246611	0.892274	0.189446	0.407808	0.868012	-0.0907657	0.283492	0.717531	0.163278
678769	Atg4al1	autophagy related 4A, cysteine peptidase-like 1	0.227739	0.731881	-0.0789953	0.0393108	0.309362	0.411484	0.0645973	0.38445	-0.194584	0.103598	0.430311	0.243685	0.490161	0.983967	0.0891838	0.499084	1	0.208353	0.246853	0.773916	-0.135254	0.383953	0.974764	0.199238	0.8176	1	0.0211251	0.0859229	0.475159	0.362925
316640	ATG4B	autophagy related 4B, cysteine peptidase	0.235251	0.738612	0.226452	0.0283581	0.289475	0.188375	0.71769	1	0.0369636	0.476131	0.834954	0.13066	0.0194212	0.721469	0.269188	0.630485	1	0.0798711	0.764185	1	0.0567846	0.877854	1	-0.0325508	0.0222678	0.319211	0.271718	0.118519	0.517017	0.291103
313391	ATG4C	autophagy related 4C, cysteine peptidase	0.0783896	0.615352	-0.565304	0.0145569	0.252542	0.142829	0.00431969	0.128872	-0.602393	0.838977	1	0.0824093	0.594077	1	-0.149651	0.637862	1	0.0787224	0.0447956	0.612323	-0.507846	0.181317	0.840681	0.309057	0.22327	0.686955	-0.308139	0.578358	0.92707	-0.112518
686505	Atg4d	autophagy related 4D, cysteine peptidase	0.422192	0.83352	0.176202	0.13453	0.446598	0.23268	0.190869	0.59294	0.200526	0.164545	0.531451	0.25589	0.992119	1	-0.00349938	0.870291	1	-0.0147727	0.291696	0.812114	0.20147	0.972288	1	-0.000397379	0.702822	1	0.0404076	0.161315	0.584049	0.31345
365601	Atg5	autophagy related 5	0.174331	0.697407	0.12269	0.0181696	0.265883	0.436554	0.899039	1	-0.0238453	0.105247	0.433039	0.247579	0.0498848	0.721469	0.1956	0.0726445	1	0.255996	0.845077	1	-0.0139139	0.259556	0.897658	0.18106	0.0432408	0.394636	0.193856	0.00167435	0.153302	0.423352
312647	ATG7	autophagy related 7	0.702337	1	-0.056211	0.75689	1	-0.0409259	0.723242	1	-0.0107599	0.59671	0.932205	-0.0669045	0.844836	1	-0.0637518	0.798942	1	-0.0163832	0.591672	0.97941	0.0696136	0.467246	1	0.114552	0.244461	0.708503	-0.150662	0.293867	0.727304	-0.183241
363254	ATG9A	autophagy related 9A	0.000690965	0.452792	0.168937	0.053864	0.32882	-0.17805	0.306217	0.709678	0.0993332	0.0427739	0.277368	-0.156615	0.0939882	0.750041	0.124492	0.647302	1	-0.0621992	0.22851	0.763908	0.109062	0.013944	0.74747	-0.196699	0.0970773	0.516642	0.134483	0.589153	0.935493	-0.0542888
499973	ATG9B	autophagy related 9B	0.25459	0.749774	0.406015	0.194771	0.514645	0.312627	0.241695	0.649428	0.347645	0.0334183	0.242176	0.443384	0.469761	0.970512	0.291809	0.801694	1	-0.065721	0.397596	0.887015	0.287224	0.654433	1	0.117738	0.237321	0.702347	0.331943	0.196032	0.627391	0.320777
81643	ATIC	5-aminoimidazole-4-carboxamide ribonucleotide formyltransferase/IMP cyclohydrolase	0.682916	1	0.037161	0.257257	0.578182	0.680931	0.451409	0.834589	-0.0887932	0.45609	0.817601	0.277596	0.195425	0.817027	0.115522	0.109692	1	0.45469	0.516618	0.952018	-0.0701173	0.524233	1	0.198864	0.247974	0.712654	0.116188	0.0202078	0.307856	0.726162
362750	ATL1	atlastin GTPase 1	0.302218	0.792542	0.201651	0.00924429	0.245897	-0.35607	0.151303	0.538943	0.183058	0.0315272	0.234253	-0.415142	0.473789	0.974136	0.0996405	0.915921	1	-0.0105168	0.243842	0.772776	0.146741	0.625846	1	-0.113923	0.330447	0.809478	0.149144	0.078927	0.465096	-0.384033
298757	ATL2	atlastin GTPase 2	0.413592	0.83352	0.11345	0.00441098	0.235112	0.283947	0.518979	0.886497	0.095089	0.0625774	0.338371	0.323883	0.532835	1	0.0855395	0.964295	1	0.0105756	0.240374	0.771137	0.132183	0.0423692	0.750579	0.370187	0.870358	1	0.0414762	0.964559	1	0.0252465
309187	ATL3	atlastin GTPase 3	0.000206174	0.452792	-0.310298	0.00564986	0.236406	0.164271	0.213129	0.616748	-0.190788	0.998903	1	0.069038	0.092972	0.750041	-0.221787	0.690842	1	0.121879	0.301907	0.820069	-0.169544	0.242962	0.890255	0.531808	0.0298493	0.353255	-0.27828	0.484965	0.88521	-0.303898
300711	ATM	ataxia telangiectasia mutated	0.13962	0.66521	-0.648372	0.0873879	0.383201	-0.199205	0.0569711	0.365321	-0.494708	0.485144	0.842134	-0.299188	0.222438	0.844538	-0.343153	0.766282	1	0.0663222	0.125928	0.680364	-0.451473	0.531504	1	0.319192	0.0708871	0.463064	-0.476186	0.276031	0.711165	-0.596019
315037	ATMIN	ATM interactor	0.890013	1	0.0118613	0.0597534	0.339946	0.533512	0.737268	1	-0.0142731	0.0963008	0.41635	0.284998	0.55959	1	0.0424464	0.0586166	1	0.296385	0.764725	1	0.0148149	0.0766897	0.752639	0.322929	0.970005	1	0.00643747	0.0174309	0.295095	0.404377
29515	ATN1	atrophin 1	0.243484	0.743486	0.10659	0.473722	0.755454	2.13501	0.279028	0.678855	0.176094	0.4187	0.786506	1.14734	0.947489	1	-0.0291683	0.370077	1	0.927046	0.262589	0.788076	0.167055	0.583446	1	0.746875	0.974305	1	-0.0114899	0.154514	0.574285	2.0796
500156	ATOH1	atonal homolog 1 (Drosophila)	1	1	0	1	1	0	1	1	0	1	1	0	1	1	0	1	1	0	1	1	0	1	1	0	1	1	0	1	1	0
365564	ATOH7	atonal homolog 7 (Drosophila)	0.0557417	0.591453	1.24892	0.0669516	0.349504	0.389547	0.00190062	0.0935518	1.12786	0.836352	1	0.0773182	0.178761	0.81636	0.605642	0.00162028	1	0.411851	0.00294925	0.612323	1.10231	0.141044	0.798529	0.261056	0.124506	0.563902	0.724442	0.114237	0.509368	0.291547
500200	ATOH8	atonal homolog 8 (Drosophila)	0.651423	1	0.0569011	0.991294	1	0.00243283	0.850281	1	0.0067025	0.723775	1	0.0733643	0.802444	1	0.0402865	0.731606	1	-0.138959	0.904694	1	-0.00346258	0.860061	1	-0.0406258	0.552984	0.954813	0.0760267	0.850964	1	0.0211936
84355	ATOX1	ATX1 antioxidant protein 1 homolog (yeast)	0.524542	0.914864	0.349516	0.00603378	0.236709	0.267874	0.136521	0.518752	0.498514	0.167981	0.536619	0.529722	0.903148	1	-0.0135648	0.485161	1	-0.220442	0.206	0.746658	0.464549	0.898604	1	-0.029505	0.836601	1	0.0466161	0.402278	0.821648	0.400473
365266	ATP10A	ATPase, class V, type 10A	0.46514	0.866951	0.318448	0.046894	0.316324	0.995765	0.36684	0.774692	0.191725	0.0754476	0.369004	0.657938	0.380419	0.948918	0.105829	0.0915982	1	0.535302	0.323932	0.83792	0.200087	0.00906679	0.74747	0.837631	0.357159	0.834001	0.217546	0.142255	0.556664	0.555881
306600	ATP11A	ATPase, class VI, type 11A	0.181262	0.69949	0.130643	0.0119939	0.248824	0.501558	0.0938255	0.447775	0.149515	0.0373319	0.255943	0.67001	0.845111	1	0.0141071	0.798243	1	-0.0935583	0.20901	0.74967	0.15139	0.0398669	0.750579	0.705925	0.731499	1	0.0337934	0.955501	1	-0.0122162
171028	ATP12A	ATPase, H+/K+ transporting, nongastric, alpha polypeptide	0.513351	0.906327	0.12684	0.0177652	0.264422	0.9656	0.23674	0.644379	-1.07191	0.482347	0.83978	-0.516317	0.169302	0.810345	1.25612	0.0162122	1	1.63423	0.313594	0.830432	-1.02517	0.780279	1	-0.226288	0.228099	0.69276	1.21341	0.0422275	0.386129	1.56453
290673	ATP13A1	ATPase type 13A1	0.897544	1	-0.0265932	0.167403	0.489085	0.140893	0.442928	0.834589	0.105004	0.0289155	0.224421	0.139262	0.301468	0.892909	-0.179974	0.836688	1	0.00561883	0.68298	1	0.0578078	0.452665	0.999005	0.060172	0.513392	0.953214	-0.109391	0.0715892	0.455762	0.129015
362645	ATP13A2	ATPase type 13A2	0.706229	1	-0.0322704	0.344948	0.677177	0.0397577	0.706795	1	-0.0494897	0.653525	0.974736	-0.070101	0.949554	1	-0.0137546	0.488033	1	0.107277	0.473743	0.936161	-0.0656826	0.286285	0.91592	-0.207557	0.79446	1	0.0123308	0.172825	0.598354	0.259707
678704	Atp13a3	ATPase type 13A3	0.572866	0.949399	0.246253	0.182449	0.50555	0.49529	0.714299	1	0.10346	0.896178	1	0.13058	0.36647	0.938071	0.269309	0.355396	1	0.382142	0.665193	1	0.104014	0.100202	0.752639	0.829647	0.351608	0.828828	0.266495	0.699026	1	-0.163449
288026	ATP13A4	ATPase type 13A4	0.975163	1	0.00847713	0.0156517	0.256296	1.42303	0.897708	1	0.00251709	0.0007047	0.0297793	1.20612	0.845087	1	0.0101986	0.325043	1	0.497311	0.929438	1	0.00251709	0.0136697	0.74747	1.09853	0.985403	1	0.0101986	0.0469089	0.396716	0.892314
303856	ATP13A5	ATPase type 13A5	1	1	0	1	1	0	1	1	0	1	1	0	1	1	0	1	1	0	1	1	0	1	1	0	1	1	0	1	1	0
24211	ATP1A1	ATPase, Na+/K+ transporting, alpha 1 polypeptide	0.0200783	0.512449	0.275056	0.112033	0.416032	0.45449	0.00557924	0.143513	0.225609	0.00247213	0.0565107	0.379123	0.275511	0.869472	0.127969	0.456507	1	0.102643	0.0976989	0.659444	0.180733	0.108818	0.753503	0.267901	0.0260076	0.336692	0.212183	0.0439578	0.389694	0.347178
24212	ATP1A2	ATPase, Na+/K+ transporting, alpha 2 polypeptide	0.502692	0.897269	0.383091	0.678452	0.94895	0.149005	0.247909	0.650829	0.353025	0.234483	0.627867	0.392076	0.690219	1	0.226381	0.519266	1	-0.161876	0.28333	0.806965	0.363926	0.312167	0.935623	0.377936	0.554609	0.955905	0.2123	0.687837	1	-0.152198
24213	ATP1A3	ATPase, Na+/K+ transporting, alpha 3 polypeptide	0.192166	0.702817	0.0960886	0.444649	0.728263	0.263053	0.900493	1	-0.00636077	0.256781	0.652976	0.149848	0.188461	0.817027	0.143833	0.557922	1	0.112008	0.887421	1	0.0215787	0.109493	0.754922	0.296722	0.301226	0.778814	0.120334	0.704755	1	0.0536158
29132	ATP1A4	ATPase, Na+/K+ transporting, alpha 4 polypeptide	0.422648	0.83352	0.417287	0.470144	0.751991	-0.0727943	0.448535	0.834589	0.241945	0.3181	0.710085	-0.107914	0.16716	0.808042	0.383986	0.705637	1	0.0382578	0.379018	0.872725	0.241945	0.696628	1	0.0547841	0.154929	0.590068	0.383986	0.275855	0.711048	-0.150797
25650	ATP1B1	ATPase, Na+/K+ transporting, beta 1 polypeptide	0.0533232	0.588393	0.30633	0.114933	0.420119	0.184193	0.00417989	0.128321	0.260024	0.0830281	0.387049	0.171964	0.401653	0.961035	0.124056	0.877804	1	0.0375906	0.0213726	0.612323	0.257461	0.055164	0.751369	0.218369	0.150044	0.585426	0.176896	0.790844	1	0.0356756
24214	ATP1B2	ATPase, Na+/K+ transporting, beta 2 polypeptide	0.802255	1	-0.0119941	0.125066	0.435632	-0.669583	0.693054	1	-0.00920727	0.0156893	0.160282	-0.570908	0.975069	1	0.00683509	0.476461	1	-0.211615	0.831853	1	0.00849128	0.289888	0.918302	-0.324196	0.500554	0.944639	-0.0212761	0.0228971	0.317815	-0.606228
25390	ATP1B3	ATPase, Na+/K+ transporting, beta 3 polypeptide	0.204003	0.70976	0.21285	0.000985416	0.219082	0.359987	0.163542	0.552893	0.127734	0.0091189	0.118818	0.423586	0.0959594	0.753663	0.156485	0.695517	1	-0.00693553	0.131613	0.680364	0.145842	0.280573	0.91357	0.269936	0.0805748	0.486419	0.161747	0.296438	0.729318	0.228934
84396	ATP1B4	ATPase, Na+/K+ transporting, beta 4 polypeptide	0.911339	1	-0.0488131	0.260042	0.58146	-0.285276	0.817898	1	-0.0438042	0.06003	0.331167	-0.302914	0.624403	1	-0.176675	0.982616	1	-0.0311617	0.884016	1	-0.0560107	0.345198	0.952193	-0.199788	0.897448	1	-0.0662954	0.288153	0.722199	-0.196846
116601	Atp2a1	ATPase, Ca++ transporting, cardiac muscle, fast twitch 1	0.930631	1	-0.0193985	0.481	0.762912	0.368821	0.290025	0.69253	0.177587	0.958226	1	-0.0103685	0.233741	0.85384	-0.268563	0.0895524	1	0.347289	0.813537	1	0.0428646	0.574802	1	0.141138	0.726899	1	-0.0925884	0.224345	0.663125	0.33999
29693	ATP2A2	ATPase, Ca++ transporting, cardiac muscle, slow twitch 2	0.121741	0.652375	0.376803	0.0301761	0.294161	0.409013	0.0536134	0.356099	0.269404	0.19024	0.57121	0.322395	0.215559	0.836479	0.216554	0.514042	1	0.126243	0.137823	0.682747	0.240958	0.0279792	0.74747	0.490374	0.0687575	0.457398	0.297831	0.864625	1	0.0681849
25391	ATP2A3	ATPase, Ca++ transporting, ubiquitous	0.342298	0.828984	-0.119989	0.00439755	0.235112	-0.856113	0.888165	1	-0.0108342	8.87016e-06	0.00472059	-0.890379	0.266944	0.863448	-0.181541	0.938123	1	-0.0930834	0.93326	1	-0.0159575	0.0999729	0.752639	-0.594091	0.22418	0.688014	-0.168156	0.0858711	0.475159	-0.589842
29598	ATP2B1	ATPase, Ca++ transporting, plasma membrane 1	0.162803	0.68205	0.191224	0.635331	0.910403	-0.0294632	0.132009	0.51243	0.194876	0.880261	1	-0.0229341	0.813153	1	0.0575549	0.948531	1	-0.0277276	0.242958	0.772776	0.17398	0.283841	0.9147	0.411391	0.591886	0.979996	0.101387	0.239294	0.679132	-0.457742
24215	ATP2B2	ATPase, Ca++ transporting, plasma membrane 2	0.0194544	0.509491	-0.381665	0.0893547	0.384501	-0.574135	0.378915	0.787422	-0.152379	0.00282528	0.060841	-0.73206	0.0107669	0.721469	-0.347848	0.87147	1	0.0763917	0.387222	0.878497	-0.136795	0.229903	0.88198	-0.415997	0.00153612	0.167509	-0.411612	0.293868	0.727304	-0.376694
29599	ATP2B3	ATPase, Ca++ transporting, plasma membrane 3	0.70663	1	-0.105636	0.129691	0.439881	-0.880533	0.516508	0.885133	-0.0558762	0.00191456	0.0499309	-1.24454	0.661488	1	-0.0591567	0.592545	1	0.270956	0.706593	1	-0.0491918	0.188077	0.846559	-0.707349	0.436496	0.892225	-0.0947887	0.380771	0.810061	-0.49771
29600	ATP2B4	ATPase, Ca++ transporting, plasma membrane 4	0.0950058	0.626221	-0.615623	0.275538	0.598272	-0.181284	0.388312	0.795686	-0.2595	0.515677	0.866269	-0.331184	0.00799401	0.721469	-0.599025	0.716117	1	0.139162	0.314545	0.831022	-0.309626	0.430187	0.988008	0.546104	0.0127063	0.274771	-0.592172	0.260986	0.700789	-0.791396
170699	ATP2C1	ATPase, Ca++ transporting, type 2C, member 1	0.898965	1	0.0126966	0.556594	0.837572	0.118571	0.679074	1	-0.049741	0.656866	0.976906	-0.0725746	0.568023	1	0.0738284	0.203097	1	0.220321	0.88519	1	-0.0243029	0.455538	0.999891	0.126954	0.756472	1	0.0450287	0.888324	1	0.0408661
171496	Atp2c2	ATPase, Ca++ transporting, type 2C, member 2	0.285556	0.779901	0.560981	0.88648	1	0.0463129	0.145235	0.530728	0.547098	0.943501	1	0.00455076	0.572588	1	0.324804	0.752443	1	0.0335023	0.435939	0.910949	0.353592	0.580854	1	0.144876	0.170455	0.610576	0.498023	0.782215	1	-0.0858788
24216	ATP4A	ATPase, H+/K+ exchanging, alpha polypeptide	0.851425	1	0.0523134	0.978226	1	0.00310874	0.57306	0.925069	0.0557674	0.437871	0.80355	-0.0816019	0.846744	1	-0.0601423	0.418991	1	0.0676849	0.803226	1	0.0199177	0.781897	1	0.0254196	0.905375	1	0.0309373	0.808398	1	-0.0269499
24217	ATP4B	ATPase, H+/K+ exchanging, beta polypeptide	1	1	0	1	1	0	1	1	0	1	1	0	1	1	0	1	1	0	1	1	0	1	1	0	1	1	0	1	1	0
65262	ATP5A1	ATP synthase, H+ transporting, mitochondrial F1 complex, alpha subunit 1, cardiac muscle	0.776296	1	0.0325644	0.323917	0.65432	0.122136	0.544978	0.90438	0.0403687	0.101544	0.426022	0.150373	0.931723	1	-0.0315914	0.761046	1	-0.0275498	0.711093	1	0.0328875	0.866575	1	0.0179543	0.856458	1	0.00260271	0.208259	0.642741	0.145122
171374	ATP5B	ATP synthase, H+ transporting, mitochondrial F1 complex, beta polypeptide	0.141665	0.666728	0.187015	0.164974	0.486833	0.302439	0.119374	0.490573	0.141021	0.0247049	0.206784	0.343214	0.375053	0.944425	0.084696	0.904863	1	-0.0218087	0.230633	0.765233	0.133141	0.408564	0.982268	0.155778	0.163041	0.59975	0.129113	0.18216	0.610787	0.253796
116550	ATP5C1	ATP synthase, H+ transporting, mitochondrial F1 complex, gamma polypeptide 1	0.459912	0.862874	-0.0890516	0.37846	0.708159	0.0517966	0.370204	0.778468	-0.0935824	0.466714	0.825867	0.0907021	0.766655	1	-0.0455907	0.729895	1	-0.0233132	0.382631	0.875863	-0.0832453	0.80843	1	-0.0404163	0.735391	1	-0.0521973	0.504166	0.899523	0.114676
245965	ATP5D	ATP synthase, H+ transporting, mitochondrial F1 complex, delta subunit	0.189757	0.701308	0.492178	0.0417497	0.313797	0.439907	0.0513161	0.351676	0.490491	0.0803449	0.379331	0.526199	0.662434	1	0.146127	0.738111	1	-0.0199546	0.115239	0.677212	0.455701	0.987809	1	0.050505	0.332688	0.812241	0.248683	0.120896	0.520938	0.558151
245958	Atp5e	ATP synthase, H+ transporting, mitochondrial F1 complex, epsilon subunit	0.714884	1	0.289594	0.0855295	0.380712	-0.299613	0.146002	0.530865	0.708133	0.675906	0.991189	0.105546	0.514776	1	-0.250282	0.200665	1	-0.426991	0.24883	0.776827	0.630496	0.511017	1	-0.281861	0.763884	1	-0.188286	0.804384	1	-0.1249
171375	ATP5F1	ATP synthase, H+ transporting, mitochondrial Fo complex, subunit B1	0.894726	1	0.0217124	0.241349	0.561207	1.08472	0.672708	1	0.0347985	0.0798705	0.378121	0.760434	0.9406	1	-0.0107108	0.411002	1	0.382755	0.64656	1	0.0417944	0.354773	0.959297	0.478576	0.932297	1	-0.0120528	0.0454537	0.39307	0.987205
29754	ATP5G1	ATP synthase, H+ transporting, mitochondrial Fo complex, subunit C1 (subunit 9)	0.0993777	0.634096	0.67233	0.131224	0.442524	0.742108	0.0148353	0.212128	0.704349	0.0534715	0.313035	0.700224	0.66227	1	0.167552	0.976967	1	0.114894	0.0406791	0.612323	0.663162	0.555612	1	0.350487	0.355604	0.832473	0.299802	0.127963	0.533109	0.663327
171082	ATP5G2	ATP synthase, H+ transporting, mitochondrial Fo complex, subunit C2 (subunit 9)	0.540581	0.927148	0.112471	0.584179	0.862916	0.0584508	0.144084	0.528738	0.35167	0.133747	0.479317	0.290878	0.394491	0.958745	-0.202712	0.237874	1	-0.227378	0.277236	0.801648	0.30982	0.820733	1	-0.0365673	0.673147	1	-0.147696	0.592846	0.938481	0.116185
114630	ATP5G3	ATP synthase, H+ transporting, mitochondrial Fo complex, subunit C3 (subunit 9)	0.389439	0.83352	0.366563	0.0382243	0.307276	0.524967	0.156948	0.546516	0.30282	0.0629629	0.338893	0.534186	0.41334	0.962785	0.189353	0.87192	1	0.0546525	0.188809	0.728457	0.301292	0.702332	1	0.199717	0.283156	0.757128	0.229329	0.147819	0.563168	0.521529
641434	Atp5h	ATP synthase, H+ transporting, mitochondrial F0 complex, subunit d	0.434111	0.845387	0.133761	0.330437	0.661417	0.488836	0.13535	0.517122	0.254164	0.232387	0.625345	0.349253	0.617934	1	-0.0959077	0.786588	1	0.17666	0.238006	0.770344	0.232816	0.905062	1	-0.0125224	0.909246	1	-0.0463036	0.0632641	0.441372	0.676663
140608	ATP5I	ATP synthase, H+ transporting, mitochondrial Fo complex, subunit E	0.0947289	0.626221	1.1784	0.620314	0.896625	-0.329419	0.00890908	0.173001	1.35025	0.455491	0.817389	0.338995	0.717672	1	0.32674	0.137917	1	-0.692713	0.0494854	0.612323	1.16125	0.808067	1	-0.128691	0.341864	0.819518	0.576153	0.624237	0.957726	-0.318634
94271	ATP5J	ATP synthase, H+ transporting, mitochondrial Fo complex, subunit F6	0.497453	0.893382	0.345297	0.308025	0.635146	0.340363	0.0893254	0.438507	0.535012	0.0813565	0.382524	0.577792	0.84641	1	-0.0166537	0.49551	1	-0.201583	0.103258	0.665241	0.525423	0.544527	1	0.290224	0.997869	1	-0.0073398	0.659052	0.981308	0.175542
690441	ATP5J2	ATP synthase, H+ transporting, mitochondrial Fo complex, subunit F2	0.536485	0.924542	0.463442	0.656018	0.929811	0.0740602	0.1193	0.490507	0.630518	0.205337	0.593168	0.501046	0.954713	1	0.0709443	0.28371	1	-0.392663	0.167834	0.705559	0.601573	0.988462	1	0.033562	0.81864	1	0.0956908	0.859431	1	0.0766259
300677	ATP5L	ATP synthase, H+ transporting, mitochondrial Fo complex, subunit G	0.665984	1	0.202764	0.60782	0.885246	-0.159876	0.118569	0.489509	0.535651	0.267373	0.66453	0.367072	0.466915	0.969386	-0.190135	0.0994875	1	-0.505588	0.195839	0.738649	0.481636	0.738797	1	-0.117343	0.683266	1	-0.1637	0.866322	1	-0.0887044
192241	ATP5O	ATP synthase, H+ transporting, mitochondrial F1 complex, O subunit	0.385432	0.83352	0.291676	0.055962	0.332531	0.176179	0.0416223	0.325898	0.372308	0.116007	0.449734	0.449496	0.958116	1	0.0493239	0.349733	1	-0.229956	0.0970848	0.659444	0.334527	0.978517	1	0.0276842	0.632446	1	0.0976925	0.508924	0.90234	0.221675
362749	ATP5S	ATP synthase, H+ transporting, mitochondrial Fo complex, subunit s (factor B)	0.0667631	0.607024	-0.767167	0.17764	0.503327	-0.400011	0.0670287	0.38959	-0.502677	0.437495	0.80312	-0.159204	0.0232605	0.721469	-0.559248	0.0453693	1	-0.269842	0.0621586	0.623416	-0.496055	0.208196	0.863164	-0.209372	0.00597856	0.237512	-0.625087	0.048071	0.399628	-0.333654
361520	ATP5SL	ATP5S-like	0.684325	1	-0.069937	0.351172	0.68237	0.0489999	0.806217	1	-0.0651078	0.17335	0.545987	0.0786301	0.639286	1	-0.0889535	0.696479	1	-0.0164609	0.465699	0.931645	-0.092809	0.711303	1	0.0308773	0.968077	1	-0.0284818	0.515131	0.907704	0.0388456
83615	ATP6AP1	ATPase, H+ transporting, lysosomal accessory protein 1	0.145055	0.667257	0.245037	0.0685988	0.35225	0.280171	0.0110211	0.187922	0.258245	0.00424407	0.0764023	0.356992	0.635527	1	0.0720901	0.612839	1	-0.0467935	0.0334335	0.612323	0.240907	0.316502	0.938377	0.201406	0.333689	0.813036	0.114241	0.274728	0.711048	0.182164
361875	Atp6ap1l	ATPase, H+ transporting, lysosomal accessory protein 1-like	0.997595	1	-0.000626764	0.0321805	0.296786	0.729425	0.35563	0.762192	0.215433	0.00626105	0.0964066	0.749168	0.353711	0.929296	-0.160735	0.944191	1	0.104447	0.591339	0.97941	0.153695	0.154926	0.819121	0.546604	0.588667	0.978633	-0.136089	0.205178	0.638458	0.467359
302526	ATP6AP2	ATPase, H+ transporting, lysosomal accessory protein 2	0.0273875	0.539826	0.114449	0.0112505	0.248824	0.391542	0.228186	0.634659	0.095047	0.0515358	0.307949	0.415504	0.596812	1	0.0585445	0.89434	1	0.0302176	0.265464	0.790706	0.0891508	0.0180611	0.74747	0.512511	0.462978	0.914571	0.076495	0.943686	1	0.0276053
29757	ATP6V0A1	ATPase, H+ transporting, lysosomal V0 subunit a1	0.0388787	0.558452	0.241929	0.0170462	0.263818	0.523701	0.00579803	0.146048	0.17729	0.345296	0.736613	0.198247	0.110776	0.765689	0.13172	0.00235908	1	0.428952	0.0204394	0.612323	0.175455	0.147746	0.807493	0.261973	0.0318212	0.358503	0.169478	0.00359826	0.186635	0.470795
116455	ATP6V0A2	ATPase, H+ transporting, lysosomal V0 subunit a2	0.539227	0.92627	0.088114	0.234291	0.552705	0.35414	0.289682	0.692001	0.0796083	0.68321	0.996858	0.166503	0.819304	1	0.0235683	0.411332	1	0.180654	0.532297	0.952018	0.0552608	0.216559	0.870975	0.396789	0.490195	0.935349	0.0672455	0.884718	1	0.07307
296981	ATP6V0A4	ATPase, H+ transporting, lysosomal V0 subunit a4	0.233674	0.73693	-0.421761	0.427909	0.71352	0.237745	0.0935425	0.447437	-0.378294	0.554744	0.899639	-0.117054	0.629364	1	-0.112299	0.0386892	1	0.39105	0.472216	0.934445	-0.19823	0.619898	1	0.121747	0.144424	0.577735	-0.387063	0.343844	0.777025	0.207329
298451	ATP6V0B	ATPase, H+ transporting, lysosomal 21kDa, V0 subunit b	0.360638	0.83352	0.400797	0.028701	0.290216	0.522616	0.129943	0.510243	0.396953	0.1419	0.494221	0.546097	0.51015	0.998489	0.197232	0.917996	1	0.0671808	0.0999763	0.661947	0.410776	0.787325	1	0.187804	0.462755	0.914424	0.188083	0.218699	0.657215	0.539238
170667	ATP6V0C	ATPase, H+ transporting, lysosomal 16kDa, V0 subunit c	0.134751	0.660825	0.480994	0.318543	0.648355	0.240014	0.127074	0.505811	0.42964	0.133866	0.47954	0.412765	0.465893	0.968998	0.199896	0.548554	1	-0.135373	0.149096	0.692249	0.430808	0.863672	1	0.0995076	0.322173	0.800607	0.260031	0.444196	0.851301	0.23297
291969	ATP6V0D1	ATPase, H+ transporting, lysosomal 38kDa, V0 subunit d1	0.30207	0.792527	0.207218	0.308733	0.635606	-0.0543956	0.104363	0.467163	0.162028	0.595546	0.931299	0.042119	0.433668	0.962785	0.0971403	0.302179	1	-0.118073	0.295262	0.81419	0.131944	0.453106	0.999005	-0.0939967	0.131877	0.564287	0.161664	0.837031	1	0.0142832
297932	ATP6V0D2	ATPase, H+ transporting, lysosomal 38kDa, V0 subunit d2	0.42265	0.83352	-0.161615	0.611146	0.888418	0.290667	0.620165	0.961527	-0.167814	0.125069	0.46444	0.606363	0.758019	1	0.0061993	0.557141	1	-0.103614	0.904483	1	-0.0130441	0.829424	1	0.146204	0.464765	0.916074	-0.202442	0.442153	0.849362	0.312046
94170	ATP6V0E1	ATPase, H+ transporting, lysosomal 9kDa, V0 subunit e1	0.439069	0.848252	0.161774	0.7694	1	-0.0500209	0.132185	0.51243	0.244337	0.684901	0.997773	0.0814606	0.945541	1	-0.00538225	0.51659	1	-0.10195	0.120751	0.680364	0.243836	0.704673	1	-0.0704059	0.983436	1	-0.00241052	0.911207	1	0.0135552
436582	ATP6V0E2	ATPase, H+ transporting V0 subunit e2	0.579754	0.953802	-0.0681439	0.172885	0.497085	0.130907	0.838656	1	-0.016513	0.354013	0.746778	0.101431	0.421737	0.962785	-0.0971553	0.582108	1	0.036815	0.640915	1	-0.0503896	0.934167	1	-0.0217972	0.580663	0.973029	-0.0556438	0.0528465	0.415693	0.198786
685232	ATP6V1A	ATPase, H+ transporting, lysosomal 70kDa, V1 subunit A	0.311134	0.799829	-0.0524332	0.332595	0.663016	0.190889	0.208101	0.608929	-0.151887	0.994023	1	0.00321968	0.499383	0.990424	0.080952	0.254097	1	0.171839	0.476532	0.939059	-0.106807	0.213421	0.86718	0.223056	0.90959	1	0.0307293	0.963935	1	0.0261855
312488	ATP6V1B1	ATPase, H+ transporting, lysosomal 56/58kDa, V1 subunit B1	0.42265	0.83352	-0.0388831	0.42265	0.708159	-0.0790705	0.799796	1	-0.00615162	0.839022	1	-0.0395353	0.997094	1	-0.052173	0.734375	1	-0.0395353	0.927022	1	0.0219473	0.607971	1	0.0953465	0.71437	1	-0.0802719	0.238838	0.679132	-0.200774
117596	ATP6V1B2	ATPase, H+ transporting, lysosomal 56/58kDa, V1 subunit B2	0.806696	1	0.0306718	0.0101273	0.247926	0.127613	0.780706	1	-0.0228204	0.221615	0.60971	0.0666069	0.494297	0.986141	0.0284945	0.0321394	1	0.0836498	0.999571	1	-0.00694893	0.000283657	0.603834	0.12687	0.666332	1	0.0395121	0.343611	0.776705	0.0508282
299971	ATP6V1C1	ATPase, H+ transporting, lysosomal 42kDa, V1 subunit C1	0.169799	0.69219	0.0901654	0.0301491	0.294161	0.469669	0.0319249	0.290583	0.131662	0.000759609	0.0308003	0.415335	0.723929	1	-0.022479	0.613509	1	0.104827	0.122497	0.680364	0.117219	0.0541644	0.751369	0.334467	0.870061	1	0.0093403	0.0890812	0.480689	0.308589
362802	ATP6V1C2	ATPase, H+ transporting, lysosomal 42kDa, V1 subunit C2	0.334866	0.822554	0.174592	0.470411	0.752216	-0.161022	0.326317	0.733068	0.289462	0.980956	1	-0.00373005	0.882007	1	-0.0480563	0.502304	1	-0.156949	0.55289	0.952895	0.202593	0.698314	1	-0.0971932	0.778582	1	0.0524675	0.741843	1	-0.117388
299159	ATP6V1D	ATPase, H+ transporting, lysosomal 34kDa, V1 subunit D	0.311803	0.799829	-0.0846726	0.529059	0.810313	0.14593	0.937753	1	0.00245899	0.360535	0.752213	0.119321	0.112358	0.767208	-0.106925	0.636772	1	0.115859	0.98361	1	0.000853037	0.873755	1	0.0427141	0.10347	0.52533	-0.120348	0.157062	0.576983	0.181609
297566	ATP6V1E1	ATPase, H+ transporting, lysosomal 31kDa, V1 subunit E1	0.776797	1	-0.0387496	0.0892245	0.384501	0.128316	0.725198	1	0.00713976	0.263029	0.658927	0.0966147	0.304875	0.895754	-0.0775058	0.894536	1	0.0468877	0.916635	1	-0.00487745	0.863663	1	-0.0160451	0.541729	0.953214	-0.0573275	0.0973022	0.494263	0.192195
366545	ATP6V1E2	ATPase, H+ transporting, lysosomal 31kDa, V1 subunit E2	0.823665	1	-0.0778246	0.242967	0.562114	0.263578	0.697487	1	-0.038525	0.803243	1	0.120553	0.943439	1	0.0480945	0.241835	1	0.182293	0.971695	1	0.00357715	0.251989	0.894679	0.258498	0.647906	1	-0.0782119	0.662058	0.983586	0.106028
116664	ATP6V1F	ATPase, H+ transporting, lysosomal 14kDa, V1 subunit F	0.313306	0.801262	0.415533	0.681396	0.951321	-0.116068	0.0644384	0.384279	0.579152	0.404539	0.772224	0.242599	0.918275	1	-0.00418679	0.215866	1	-0.33437	0.134184	0.680364	0.51754	0.655882	1	-0.131303	0.730251	1	0.0896479	0.978376	1	-0.0153552
298103	ATP6V1G1	ATPase, H+ transporting, lysosomal 13kDa, V1 subunit G1	0.144685	0.667257	-0.245361	0.826856	1	0.0258606	0.585003	0.93392	-0.0925618	0.848545	1	0.0347201	0.052446	0.721469	-0.267981	0.971732	1	0.0425821	0.468605	0.933016	-0.100072	0.531927	1	-0.0790163	0.0420897	0.391474	-0.26547	0.374498	0.804756	0.130644
368044	ATP6V1G2	ATPase, H+ transporting, lysosomal 13kDa, V1 subunit G2	0.911376	1	-0.0305279	0.552879	0.834044	-0.228285	0.524781	0.889914	0.0396763	0.20518	0.593168	-0.347318	0.364612	0.936572	-0.141876	0.606565	1	0.187389	0.797995	1	-0.0463247	0.233119	0.886165	-0.436951	0.989871	1	-0.0182698	0.717202	1	0.155356
289407	ATP6V1G3	ATPase, H+ transporting, lysosomal 13kDa, V1 subunit G3	1	1	0	1	1	0	1	1	0	1	1	0	1	1	0	1	1	0	1	1	0	1	1	0	1	1	0	1	1	0
297797	ATP6V1H	ATPase, H+ transporting, lysosomal 50/57kDa, V1 subunit H	0.160078	0.680529	-0.205019	0.101522	0.403011	0.198306	0.0235927	0.256895	-0.209169	0.321881	0.713092	0.0997685	0.476297	0.975082	-0.0903095	0.283727	1	0.14892	0.0401314	0.612323	-0.192076	0.254806	0.895266	0.136874	0.291238	0.767769	-0.112769	0.237175	0.678396	0.144328
24941	ATP7A	ATPase, Cu++ transporting, alpha polypeptide	0.962644	1	0.00938139	0.349547	0.681222	0.110453	0.682053	1	-0.0831611	0.690547	1	-0.146587	0.636915	1	0.116687	0.563204	1	0.25914	0.970098	1	-0.00720482	0.30111	0.930551	0.687434	0.977964	1	0.0277614	0.409974	0.825888	-0.539464
24218	ATP7B	ATPase, Cu++ transporting, beta polypeptide	0.402457	0.83352	-0.223783	0.908418	1	-0.0111839	0.0620144	0.378397	-0.460078	0.354483	0.746857	-0.182892	0.541609	1	0.232357	0.384713	1	0.187988	0.13641	0.680567	-0.405631	0.58867	1	0.132969	0.734725	1	0.105942	0.547127	0.923051	-0.142455
291555	ATP8B1	ATPase, aminophospholipid transporter, class I, type 8B, member 1	0.0248052	0.527267	-0.550774	0.0884655	0.383936	-0.430532	0.0867297	0.432886	-0.336239	0.213162	0.599238	-0.568008	0.0389716	0.721469	-0.397153	0.767044	1	0.0621886	0.198833	0.739204	-0.292311	0.790767	1	0.101588	0.00104867	0.146927	-0.502927	0.183298	0.612433	-0.700726
361984	UBAP2L	ubiquitin associated protein 2-like	0.425126	0.835631	-0.0763291	0.867289	1	0.0287191	0.0425676	0.328914	-0.106679	0.747846	1	0.138022	0.919239	1	-0.00320662	0.845686	1	-0.124024	0.112758	0.673968	-0.0932993	0.196813	0.854597	0.341222	0.737805	1	-0.0196583	0.253831	0.696081	-0.307837
291411	ATP9B	ATPase, class II, type 9B	0.222165	0.726611	-0.181723	0.263856	0.585977	-0.102518	0.0101445	0.183363	-0.228885	0.0553066	0.317634	-0.16784	0.975358	1	-0.0416544	0.493177	1	0.0628452	0.0585649	0.619863	-0.199096	0.43591	0.991114	-0.102522	0.522345	0.953214	-0.0728074	0.658374	0.981086	-0.0349941
313510	ATPAF1	ATP synthase mitochondrial F1 complex assembly factor 1	0.188609	0.701308	-0.202678	0.219271	0.536059	0.143613	0.0942877	0.447775	-0.162834	0.540608	0.88782	0.041386	0.459152	0.965885	-0.0730178	0.15319	1	0.115973	0.445655	0.917354	-0.0883227	0.252193	0.894679	0.090489	0.0641983	0.449731	-0.192972	0.261646	0.701134	0.105577
303190	ATPAF2	ATP synthase mitochondrial F1 complex assembly factor 2	0.674032	1	-0.0960979	0.0625194	0.343987	0.29183	0.835055	1	-0.0494575	0.281179	0.680908	0.215345	0.397717	0.959676	-0.134717	0.373192	1	0.130485	0.928429	1	-0.019663	0.611439	1	0.0936709	0.292051	0.768484	-0.137826	0.0740186	0.458662	0.313435
362191	ATPBD4	ATP binding domain 4	0.0577858	0.595836	-0.519303	0.0843823	0.379479	-0.264293	0.044554	0.334843	-0.408959	0.523654	0.872757	-0.064194	0.0933729	0.750041	-0.302952	0.144541	1	-0.219605	0.0089928	0.612323	-0.460416	0.928652	1	-0.0309082	0.130196	0.564287	-0.296192	0.0158501	0.288383	-0.327984
25392	ATPIF1	ATPase inhibitory factor 1	0.82044	1	0.0419195	0.976753	1	-0.00703953	0.350059	0.757305	0.241788	0.435814	0.801935	0.166572	0.467671	0.969891	-0.217578	0.417974	1	-0.115468	0.534447	0.952018	0.202189	0.455518	0.999891	-0.175921	0.685013	1	-0.1522	0.476338	0.879787	0.185916
298841	ATRAID	all-trans retinoic acid-induced differentiation factor	0.79574	1	0.0395353	0.230592	0.54902	-0.105396	0.462266	0.841642	0.0672256	0.826217	1	0.00800402	0.895595	1	0.00807002	0.364504	1	-0.123792	0.728958	1	0.0384948	0.233291	0.886269	-0.209917	0.775415	1	0.026139	0.690868	1	0.0659247
301014	ATRIP	ATR interacting protein	0.0463015	0.573048	0.210935	0.213424	0.530121	0.675125	0.887963	1	-0.0223343	0.187646	0.567805	0.445496	0.00968534	0.721469	0.288978	0.447761	1	0.267165	0.937347	1	0.0111675	0.666658	1	0.186522	0.016115	0.292577	0.288649	0.0449399	0.39307	0.726157
83526	ATRN	attractin	0.437244	0.847264	-0.178496	0.233271	0.551885	-0.239068	0.192157	0.595183	-0.204311	0.158536	0.522318	-0.350315	0.784283	1	-0.0447373	0.664949	1	0.0862939	0.243948	0.772776	-0.189495	0.938382	1	-0.000356347	0.599543	0.985242	-0.0720174	0.256702	0.698679	-0.326718
25049	ATXN1	ataxin 1	0.180019	0.69949	0.668707	0.876799	1	-0.0310476	0.166443	0.556008	0.495581	0.840739	1	-0.104878	0.146475	0.791694	0.522135	0.881729	1	0.0163838	0.147423	0.690644	0.466907	0.425836	0.986499	0.521404	0.118592	0.554349	0.541039	0.391276	0.819358	-0.58195
170821	ATXN10	ataxin 10	0.179345	0.69949	-0.250809	0.0185527	0.266428	-0.353428	0.0775896	0.411604	-0.199215	0.0117414	0.136437	-0.35853	0.264664	0.861967	-0.173735	0.659787	1	-0.0694629	0.133738	0.680364	-0.18158	0.0383686	0.750579	-0.336148	0.114623	0.546323	-0.193546	0.432693	0.841961	-0.159944
361649	ATXN2L	ataxin 2-like	0.1887	0.701308	0.261465	0.233731	0.552225	0.0679921	0.0307209	0.286987	0.243281	0.731386	1	0.103234	0.436596	0.962785	0.0967387	0.873764	1	-0.0334011	0.103072	0.665241	0.20907	0.24278	0.890255	0.187623	0.208583	0.664986	0.165735	0.543314	0.922139	-0.0963534
60331	ATXN3	ataxin 3	0.543089	0.929094	-0.112738	0.921671	1	-0.0232118	0.300716	0.70472	-0.162339	0.65551	0.97625	-0.0583508	0.849207	1	0.0328603	0.709781	1	0.0726747	0.791378	1	-0.067198	0.319966	0.940778	0.339086	0.539832	0.953214	-0.0886998	0.278967	0.713647	-0.357523
100192313	ATXN7L3B	ataxin 7-like 3B	1	1	-0.37338	0.104153	0.405885	-0.348899	0.0226201	0.251285	-0.338756	0.0191181	0.180178	-0.543049	0.387161	0.954175	-0.199621	0.515326	1	0.140912	0.140668	0.685269	-0.266477	0.674792	1	-0.152473	0.0747668	0.470365	-0.286362	0.230277	0.669265	-0.330471
361215	AUH	AU RNA binding protein/enoyl-CoA hydratase	0.00086793	0.452792	0.354022	0.287616	0.612263	-0.164633	0.000948724	0.0760809	0.288351	0.014184	0.151159	-0.238981	0.139407	0.78667	0.183579	0.621735	1	0.0779129	0.00364546	0.612323	0.285732	0.16706	0.830138	-0.17716	0.051501	0.417858	0.2256	0.762648	1	-0.0411622
680423	AUP1	ancient ubiquitous protein 1	0.366339	0.83352	0.218093	0.0291905	0.290752	0.396534	0.231015	0.637943	0.194246	0.0765436	0.37138	0.35399	0.568467	1	0.0920658	0.77423	1	0.10576	0.33004	0.840022	0.175351	0.822721	1	0.0768329	0.362692	0.836812	0.13818	0.0304779	0.350085	0.472951
261730	AURKA	aurora kinase A	0.931723	1	-0.0270701	0.742297	1	0.0858747	0.323461	0.729898	-0.18444	0.667156	0.984203	0.101653	0.418617	0.962785	0.195616	0.963056	1	-0.058571	0.365743	0.864035	-0.191989	0.917654	1	-0.0434887	0.467568	0.917693	0.168644	0.593495	0.938896	0.143724
298687	AURKAIP1	aurora kinase A interacting protein 1	0.55929	0.93997	0.148892	0.167311	0.489066	0.26171	0.353222	0.760477	0.176085	0.0535402	0.313222	0.453866	0.984539	1	-0.023216	0.50846	1	-0.111834	0.507101	0.952018	0.16555	0.754482	1	0.116586	0.749697	1	0.0342988	0.34011	0.773515	0.259134
114592	AURKB	aurora kinase B	0.733138	1	0.0198533	0.407739	0.708159	-0.18975	0.546799	0.905795	-0.0962275	0.666319	0.983566	0.0745727	0.422782	0.962785	0.117775	0.125985	1	-0.355328	0.478748	0.941137	-0.107049	0.34543	0.952505	-0.244819	0.3512	0.828699	0.134084	0.893019	1	-0.0385165
292554	Aurkc	aurora kinase C	0.0242452	0.524363	-0.341085	0.257026	0.577843	-0.146888	0.465023	0.84408	-0.129131	0.57449	0.914868	0.0933936	0.0371612	0.721469	-0.314958	0.209084	1	-0.246437	0.369926	0.866671	-0.137545	0.24337	0.890255	-0.292324	0.0180961	0.299783	-0.35157	0.688419	1	0.0944211
311299	Aven	apoptosis, caspase activation inhibitor	0.947582	1	-0.0241707	0.0491286	0.320039	0.403457	0.950654	1	0.0111272	0.0593323	0.329344	0.50649	0.84058	1	0.0258887	0.651339	1	-0.0540765	0.683231	1	-0.076107	0.918269	1	0.0863751	0.795007	1	0.0642749	0.162725	0.586353	0.467887
79253	Avil	advillin	0.221654	0.726611	-0.211406	0.604197	0.881326	0.155296	0.136124	0.518148	-0.162764	0.884913	1	-0.0114253	0.261612	0.860421	-0.134212	0.257638	1	0.145032	0.211809	0.751481	-0.145186	0.766269	1	0.0484076	0.122231	0.561018	-0.165212	0.428809	0.838446	0.151424
24221	AVP	arginine vasopressin	0.422648	0.83352	-0.277244	0.523359	0.80455	-0.113751	0.45421	0.834589	-0.138622	0.500123	0.853159	-0.140325	0.19768	0.817027	-0.277244	0.986907	1	0.0265735	0.536795	0.952018	-0.138622	0.524002	1	0.151513	0.135389	0.564287	-0.277244	0.145441	0.560377	-0.303182
171386	AVPI1	arginine vasopressin-induced 1	0.430497	0.841621	0.161951	0.0837066	0.3785	0.289246	0.184157	0.582177	0.21725	0.116956	0.451544	0.397843	0.979365	1	-0.0135046	0.903925	1	-0.0487581	0.388412	0.879025	0.161909	0.554617	1	0.158963	0.635686	1	0.067957	0.339629	0.772922	0.246645
25107	AVPR1A	arginine vasopressin receptor 1A	0.882901	1	-0.0233346	0.0656568	0.348006	-0.846813	0.750366	1	0.0667871	0.0750267	0.368565	-0.442286	0.594333	1	-0.0470108	0.0706002	1	-0.485075	0.815111	1	0.0414632	0.0112125	0.74747	-0.660495	0.644024	1	-0.0582056	0.0991654	0.494263	-0.495438
29462	AVPR1B	arginine vasopressin receptor 1B	0.0341751	0.551661	1.11167	0.0465659	0.316324	1.96651	0.402634	0.807544	0.440659	0.177991	0.554468	0.796734	0.0422123	0.721469	1.01413	0.0364499	1	1.34964	0.616436	0.995261	0.288447	0.240849	0.889225	0.881525	0.000710183	0.141294	1.30815	0.00259877	0.17022	1.80044
25108	AVPR2	arginine vasopressin receptor 2	0.132999	0.658185	-0.33374	0.77705	1	0.0793482	0.231413	0.637943	-0.277346	0.613242	0.94426	-0.157434	0.524126	1	-0.181301	0.455269	1	0.264684	0.488954	0.947084	-0.199484	0.990513	1	0.0280385	0.207414	0.664084	-0.287138	0.801748	1	0.0870597
679520	AWAT1	acyl-CoA wax alcohol acyltransferase 1	1	1	0	1	1	0	1	1	0	1	1	0	1	1	0	1	1	0	1	1	0	1	1	0	1	1	0	1	1	0
302425	AWAT2	acyl-CoA wax alcohol acyltransferase 2	0.235261	0.738612	-0.160501	0.370117	0.6998	0.211522	0.925586	1	0.035911	0.57999	0.918996	0.136432	0.437948	0.962785	-0.218698	0.561276	1	0.141633	0.441281	0.914338	0.183067	0.263503	0.901458	0.249014	0.0679299	0.456111	-0.404497	0.861273	1	0.0551964
79257	AXIN1	axin 1	0.315769	0.804541	0.0481755	0.658905	0.932454	0.0361965	0.468141	0.84705	-0.0385952	0.511693	0.8627	-0.0312096	0.0363808	0.721469	0.0923928	0.193774	1	0.0649932	0.823251	1	-0.0190996	0.793664	1	0.0158989	0.114542	0.546094	0.0852077	0.682651	0.999016	0.0315587
29134	AXIN2	axin 2	0.232341	0.736126	0.659468	0.343701	0.675292	-0.261012	0.269328	0.666375	0.393918	0.165349	0.532405	-0.425775	0.158632	0.798641	0.557095	0.598003	1	0.109467	0.264786	0.789998	0.393905	0.930499	1	0.000716647	0.109956	0.537012	0.582567	0.313086	0.746341	-0.367165
308444	AXL	AXL receptor tyrosine kinase	0.371019	0.83352	-0.156771	0.0365788	0.305169	-0.734188	0.946735	1	-0.0172961	0.0317201	0.234969	-0.593056	0.0870868	0.746033	-0.23312	0.711773	1	-0.261132	0.797527	1	-0.049125	0.423895	0.986362	-0.344801	0.185734	0.631858	-0.191118	0.047297	0.397321	-0.674116
25294	AZGP1	alpha-2-glycoprotein 1, zinc-binding	0.0476635	0.577089	-0.779065	0.39086	0.708159	0.162649	0.0115951	0.190175	-0.621107	0.11128	0.441487	0.247648	0.231041	0.850085	-0.421185	0.667154	1	-0.0806305	0.0771093	0.645293	-0.530816	0.326355	0.944924	0.183662	0.0491382	0.410166	-0.59568	0.87969	1	0.03466
360672	AZI1	5-azacytidine induced 1	0.385448	0.83352	-0.215297	0.0248092	0.284414	-0.640607	0.953811	1	-0.031479	0.161752	0.527822	-0.320317	0.131594	0.784236	-0.310598	0.0566468	1	-0.415167	0.49838	0.952018	-0.128912	0.0499006	0.750579	-0.444766	0.416719	0.876498	-0.200411	0.0707708	0.454737	-0.441003
316051	AZI2	5-azacytidine induced 2	0.64611	1	0.0598578	0.147575	0.464369	0.191106	0.811558	1	-0.0259132	0.0280029	0.220986	0.136169	0.173258	0.812328	0.113729	0.497886	1	0.0829374	0.748033	1	-0.0205919	0.404949	0.981948	0.0812231	0.158601	0.594309	0.109722	0.0143221	0.279041	0.182919
58961	AZIN1	antizyme inhibitor 1	0.532354	0.920351	0.0713854	0.058939	0.338432	0.471011	0.799234	1	-0.0369981	0.0401863	0.268221	0.400198	0.240966	0.857365	0.111168	0.615104	1	0.111778	0.891857	1	-8.56853e-05	0.0253158	0.74747	0.472608	0.402331	0.863915	0.0961943	0.511509	0.904382	0.169062
24223	B2M	beta-2-microglobulin	0.613126	0.978347	0.130636	0.672839	0.943718	-0.101407	0.467094	0.846225	0.133509	0.651863	0.97335	0.144321	0.79369	1	0.00851225	0.326811	1	-0.261143	0.431676	0.90781	0.143989	0.614641	1	0.116024	0.787938	1	0.0339878	0.299745	0.732269	-0.256372
310508	B3GALNT1	beta-1,3-N-acetylgalactosaminyltransferase 1 (globoside blood group)	0.199373	0.708546	0.649427	0.0683517	0.351564	0.449309	0.152246	0.539931	0.410813	0.000442669	0.0233275	0.449743	0.0937383	0.750041	0.577839	0.990164	1	0.0527777	0.217441	0.755756	0.40358	0.113526	0.758153	0.327621	0.0370793	0.374693	0.575398	0.131054	0.538963	0.289195
291212	B3GALNT2	beta-1,3-N-acetylgalactosaminyltransferase 2	0.50996	0.903753	0.0558255	0.118548	0.425484	0.306308	0.527721	0.892729	-0.0787993	0.111	0.441125	0.332154	0.196101	0.817027	0.160225	0.810986	1	0.0438828	0.740398	1	-0.0495182	0.0726805	0.752639	0.368392	0.311102	0.788326	0.132486	0.904358	1	0.0632611
366064	B3GALT1	UDP-Gal:betaGlcNAc beta 1,3-galactosyltransferase, polypeptide 1	0.842739	1	-0.0756666	0.205976	0.523704	0.744034	0.440577	0.834589	-0.164444	0.273733	0.672778	0.420154	0.707036	1	0.146363	0.202902	1	0.391883	0.675128	1	-0.107195	0.0186522	0.74747	0.780827	0.996034	1	0.0255012	0.634043	0.96443	0.233886
686081	B3GALT2	UDP-Gal:betaGlcNAc beta 1,3-galactosyltransferase, polypeptide 2	0.161079	0.680858	0.657871	0.697652	0.965465	-0.096841	0.633626	0.971868	0.189514	0.330787	0.722203	-0.293107	0.0492047	0.721469	0.758122	0.588737	1	0.186844	0.535733	0.952018	0.261487	0.828337	1	0.0614235	0.0584147	0.435765	0.712262	0.491574	0.889643	-0.193686
171079	B3GALT4	UDP-Gal:betaGlcNAc beta 1,3-galactosyltransferase, polypeptide 4	0.14741	0.670277	-0.25869	0.30851	0.63553	-0.0909054	0.992962	1	-0.000492675	0.604986	0.938761	0.0908187	0.152232	0.794668	-0.363675	0.321574	1	-0.20337	0.909625	1	-0.0042313	0.363312	0.963204	-0.201914	0.15566	0.590435	-0.375848	0.700641	1	0.0734919
288161	B3GALT5	UDP-Gal:betaGlcNAc beta 1,3-galactosyltransferase, polypeptide 5	0.911253	1	-0.0777141	0.124734	0.435414	-0.315109	0.80706	1	-0.104587	0.461782	0.821836	-0.204931	0.998946	1	0.124495	0.559575	1	-0.154093	0.821325	1	-0.0751937	0.223516	0.874759	-0.36036	0.970836	1	0.00411558	0.759801	1	-0.0744235
298690	B3GALT6	UDP-Gal:betaGal beta 1,3-galactosyltransferase polypeptide 6	0.291442	0.785127	-0.189826	0.262574	0.584255	0.131976	0.95481	1	-0.0108542	0.453473	0.814969	0.189609	0.0313302	0.721469	-0.275519	0.950639	1	-0.0495235	0.570664	0.96453	-0.0996952	0.331022	0.945856	0.219633	0.220177	0.682245	-0.185588	0.792202	1	-0.0409628
117108	B3GAT1	beta-1,3-glucuronyltransferase 1 (glucuronosyltransferase P)	0.479947	0.878693	-0.273548	0.00208314	0.219304	-1.4666	0.20034	0.59814	-0.215629	9.07495e-05	0.0113412	-1.64508	0.543103	1	-0.133154	0.952061	1	-0.0863168	0.326774	0.838398	-0.202246	0.123424	0.770779	-1.03368	0.306009	0.784366	-0.187563	0.11081	0.502135	-1.01005
64544	B3gat2	beta-1,3-glucuronyltransferase 2 (glucuronosyltransferase S)	0.800862	1	-0.0280637	0.70717	0.973803	0.0695138	0.801501	1	-0.0442229	0.283065	0.683306	0.188907	0.933046	1	0.0346572	0.507025	1	-0.0543573	0.360918	0.864035	-0.179729	0.62543	1	0.119915	0.468269	0.917736	0.148477	0.959647	1	-0.00555078
293722	B3GAT3	beta-1,3-glucuronyltransferase 3 (glucuronosyltransferase I)	0.219116	0.724712	0.246392	0.127516	0.438009	0.213783	0.0472187	0.342634	0.355543	0.219948	0.607677	0.308099	0.856915	1	-0.0191987	0.666215	1	-0.0582248	0.128311	0.680364	0.308092	0.848407	1	-0.0278293	0.732867	1	0.0504147	0.285037	0.718285	0.324904
293667	B3GNT1	UDP-GlcNAc:betaGal beta-1,3-N-acetylglucosaminyltransferase 1	0.495761	0.891815	-0.0363568	0.393042	0.708159	2.09641	0.149099	0.535887	-0.137035	0.337627	0.729152	1.11712	0.364575	0.936572	0.0978104	0.302871	1	1.00347	0.536554	0.952018	-0.0697197	0.529554	1	0.740978	0.872734	1	0.0202879	0.0982164	0.494263	2.0623
305571	B3GNT2	UDP-GlcNAc:betaGal beta-1,3-N-acetylglucosaminyltransferase 2	0.140926	0.665224	0.72733	0.206722	0.52436	0.346479	0.091302	0.442999	0.503725	0.0193887	0.181124	0.354602	0.129509	0.784236	0.567254	0.972165	1	0.0902745	0.194908	0.736963	0.439354	0.0912672	0.752639	0.327588	0.0259007	0.336254	0.644969	0.379525	0.808986	0.167183
290638	B3GNT3	UDP-GlcNAc:betaGal beta-1,3-N-acetylglucosaminyltransferase 3	0.36144	0.83352	0.424472	0.829535	1	-0.0234696	0.253086	0.650829	0.377012	0.747838	1	-0.0521759	0.533456	1	0.148298	0.858732	1	0.0139088	0.198896	0.739204	0.417401	0.326372	0.944924	-0.19235	0.533052	0.953214	0.182175	0.420841	0.833451	0.156124
288752	B3GNT4	UDP-GlcNAc:betaGal beta-1,3-N-acetylglucosaminyltransferase 4	0.96553	1	-0.00489583	0.415388	0.708159	-0.477606	0.527812	0.892729	-0.0478368	0.0561878	0.319765	-0.64458	0.552342	1	0.0709237	0.801083	1	0.166974	0.503905	0.952018	-0.120918	0.45557	0.999891	-0.272031	0.5316	0.953214	0.123718	0.335666	0.768579	-0.364777
116740	B3GNT5	UDP-GlcNAc:betaGal beta-1,3-N-acetylglucosaminyltransferase 5	0.848691	1	-0.0498333	0.422649	0.708159	0.177817	0.622362	0.963522	0.0775233	0.660176	0.979034	-0.208037	0.445401	0.962785	-0.15833	0.406756	1	0.474763	0.905846	1	-0.0432494	0.366042	0.965223	-0.46087	0.870581	1	-0.0335194	0.171156	0.596737	0.727596
292325	B3GNT6	UDP-GlcNAc:betaGal beta-1,3-N-acetylglucosaminyltransferase 6 (core 3 synthase)	0.873785	1	-0.0574397	0.97719	1	-0.00830597	0.615418	0.957054	-0.0837939	0.95792	1	0.0636942	0.818687	1	0.123941	0.919698	1	0.0169084	0.8769	1	-0.0416918	0.855164	1	-0.0508598	0.893131	1	-0.00236561	0.897558	1	0.0694214
316583	B3GNT7	UDP-GlcNAc:betaGal beta-1,3-N-acetylglucosaminyltransferase 7	0.428753	0.840039	0.10784	0.0827019	0.377591	-0.408846	0.354937	0.761247	0.196449	0.286133	0.687241	-0.200621	0.797417	1	-0.0238978	0.264872	1	-0.25914	0.689273	1	0.11807	0.1039	0.752639	-0.350175	0.766377	1	0.047286	0.380706	0.810022	-0.211925
308440	B3GNT8	UDP-GlcNAc:betaGal beta-1,3-N-acetylglucosaminyltransferase 8	0.469879	0.871976	0.273322	0.250813	0.571494	0.284473	0.399621	0.805381	0.161017	0.78116	1	0.0424296	0.248148	0.857365	0.19025	0.221607	1	0.249643	0.262378	0.788076	0.210543	0.791309	1	0.0776975	0.321203	0.799837	0.179868	0.175149	0.600801	0.304133
367384	B3GNTL1	UDP-GlcNAc:betaGal beta-1,3-N-acetylglucosaminyltransferase-like 1	0.357915	0.83352	-0.376878	0.117423	0.423726	-0.645768	0.064876	0.384995	-0.365538	0.0676329	0.351508	-0.354866	0.607152	1	-0.165239	0.129448	1	-0.31898	0.0843152	0.649457	-0.370246	0.100416	0.752639	-0.397202	0.405001	0.866173	-0.183558	0.0286279	0.34261	-0.473181
64828	B4GALNT1	beta-1,4-N-acetyl-galactosaminyl transferase 1	0.654955	1	-0.156925	0.267522	0.589684	0.0900065	0.852145	1	0.0910864	0.435554	0.801877	-0.271958	0.324121	0.907316	-0.185548	0.252938	1	0.393607	0.638498	1	0.165476	0.532137	1	-0.187193	0.174324	0.616045	-0.353888	0.338959	0.771734	0.317749
500306	B4GALNT3	beta-1,4-N-acetyl-galactosaminyl transferase 3	0.205462	0.711373	0.282663	0.069815	0.353913	-0.882151	0.969452	1	0.0408915	0.0106095	0.128507	-0.637504	0.169992	0.810397	0.383103	0.423393	1	-0.324556	0.712872	1	-0.113292	0.0769805	0.752639	-0.609912	0.048081	0.407779	0.537286	0.0696086	0.453674	-0.592925
309105	B4GALNT4	beta-1,4-N-acetyl-galactosaminyl transferase 4	0.921522	1	-0.0235632	0.0144377	0.252542	-0.958378	0.702298	1	0.020596	0.000139983	0.0135449	-0.835943	0.54882	1	-0.032235	0.418637	1	-0.285713	0.659434	1	-0.0465304	0.00934865	0.74747	-0.765801	0.831553	1	0.0190875	0.0963689	0.494263	-0.566462
24390	B4GALT1	UDP-Gal:betaGlcNAc beta 1,4- galactosyltransferase, polypeptide 1	0.599566	0.969053	0.0689498	0.0190305	0.267735	0.463645	0.496748	0.870316	-0.174869	0.0116111	0.135809	0.393384	0.252549	0.857365	0.288364	0.303651	1	0.159038	0.432866	0.908618	-0.175482	0.0177517	0.74747	0.392633	0.213632	0.672237	0.282263	0.207814	0.642301	0.255153
313536	B4GALT2	UDP-Gal:betaGlcNAc beta 1,4- galactosyltransferase, polypeptide 2	0.45475	0.858675	-0.153615	0.297961	0.623988	-0.179807	0.612628	0.954534	-0.101437	0.387988	0.764011	-0.148729	0.203996	0.824566	-0.161344	0.712021	1	-0.0585944	0.304471	0.822517	-0.122991	0.0789876	0.752639	-0.286103	0.394473	0.856686	-0.118217	0.788913	1	0.0371884
494342	B4GALT3	UDP-Gal:betaGlcNAc beta 1,4- galactosyltransferase, polypeptide 3	0.28549	0.779901	0.163991	0.288171	0.612984	0.0750883	0.148255	0.534457	0.13615	0.461105	0.821317	0.106802	0.3309	0.910723	0.0884397	0.845504	1	-0.00215126	0.188368	0.728247	0.126614	0.721603	1	-0.0449368	0.208078	0.664586	0.112239	0.329693	0.763919	0.154909
303923	B4GALT4	UDP-Gal:betaGlcNAc beta 1,4- galactosyltransferase, polypeptide 4	0.0539942	0.590216	0.596569	0.089589	0.384501	1.47882	0.000602183	0.0670273	0.541606	0.000985384	0.0343742	1.62697	0.303726	0.894627	0.279791	0.973826	1	-0.0223279	0.023238	0.612323	0.473918	0.150325	0.810584	1.02819	0.0756185	0.472473	0.39645	0.242538	0.683959	0.985512
362275	B4galt5	UDP-Gal:betaGlcNAc beta 1,4-galactosyltransferase, polypeptide 5	0.660497	1	0.0741954	0.0556673	0.331821	-0.392464	0.208053	0.608907	0.180338	0.0584012	0.325875	-0.256961	0.610368	1	-0.0680124	0.125704	1	-0.219805	0.493595	0.950163	0.109685	0.00914012	0.74747	-0.334378	0.974516	1	0.00195284	0.156287	0.576518	-0.217009
65196	B4GALT6	UDP-Gal:betaGlcNAc beta 1,4- galactosyltransferase, polypeptide 6	0.14562	0.66776	-0.349699	0.139705	0.454138	-0.443096	0.116146	0.485346	-0.226347	0.0733347	0.365279	-0.36037	0.186989	0.817027	-0.195248	0.335955	1	-0.186159	0.283812	0.807032	-0.169749	0.389404	0.979166	-0.181376	0.0337325	0.366368	-0.320482	0.0184046	0.298221	-0.443896
364675	B4GALT7	xylosylprotein beta 1,4-galactosyltransferase, polypeptide 7	0.26746	0.762701	0.118215	0.00803297	0.245683	0.237035	0.0357783	0.304196	0.200051	0.104869	0.432473	0.286972	0.519631	1	-0.0644367	0.751043	1	-0.0174742	0.139047	0.6829	0.179374	0.871085	1	-0.0177018	0.965037	1	-0.0159544	0.107896	0.496338	0.344569
287383	B9D1	B9 protein domain 1	0.588134	0.961037	0.0850174	0.285266	0.6089	0.925593	0.268674	0.66567	0.131844	0.148701	0.506258	0.606059	0.700148	1	-0.0753408	0.448459	1	0.376922	0.362077	0.864035	0.157789	0.633761	1	0.258527	0.891421	1	-0.0539372	0.0346257	0.363473	0.994725
308443	B9D2	B9 protein domain 2	0.158791	0.678937	-0.34617	0.203764	0.522059	-0.48711	0.411176	0.816408	-0.20147	0.171889	0.543952	-0.378056	0.318847	0.904924	-0.269957	0.598769	1	-0.104697	0.534242	0.952018	-0.131007	0.078364	0.752639	-0.523153	0.177505	0.620812	-0.372306	0.789892	1	-0.124875
140720	BAALC	brain and acute leukemia, cytoplasmic	0.246172	0.744476	0.244296	0.0079407	0.245683	0.865984	0.0142823	0.209206	0.270402	0.000213912	0.0171836	0.840797	0.828622	1	0.00254918	0.750018	1	0.140789	0.0433512	0.612323	0.267665	0.0488561	0.750579	0.642884	0.660241	1	0.0676143	0.113019	0.506106	0.550295
29725	BAAT	bile acid CoA: amino acid N-acyltransferase (glycine N-choloyltransferase)	0.241972	0.74151	-0.490693	0.346555	0.678943	0.4304	0.0969602	0.451417	-0.395579	0.0715023	0.362406	0.469172	0.332905	0.913089	-0.213631	0.858188	1	0.188699	0.0397775	0.612323	-0.486413	0.506484	1	0.250246	0.401603	0.863113	-0.20735	0.137967	0.548199	0.399445
290631	BABAM1	BRISC and BRCA1 A complex member 1	0.771163	1	0.0568232	0.671197	0.942214	-0.0628596	0.292953	0.695523	0.170009	0.851868	1	-0.0181497	0.550947	1	-0.114784	0.592023	1	-0.0744133	0.62723	1	0.0958039	0.199761	0.85659	-0.25116	0.983646	1	-0.0205724	0.388182	0.815838	0.157446
29392	BACE1	beta-site APP-cleaving enzyme 1	0.949654	1	-0.0151823	0.447632	0.730818	-0.0728578	0.907966	1	-0.0419333	0.234952	0.628433	-0.37926	0.991762	1	0.00780623	0.342392	1	0.270692	0.793634	1	-0.0575611	0.821937	1	0.0529584	0.898793	1	0.0310031	0.636098	0.965927	-0.162005
288227	BACE2	beta-site APP-cleaving enzyme 2	0.454431	0.858391	-0.17012	0.0627501	0.343987	-0.636532	0.52119	0.887718	-0.0883371	0.0488098	0.299759	-0.421779	0.211676	0.834263	-0.164569	0.126942	1	-0.374017	0.330381	0.840163	-0.119861	0.0306676	0.748984	-0.476574	0.308035	0.78628	-0.134561	0.0604931	0.435786	-0.425224
304127	BACH1	BTB and CNC homology 1, basic leucine zipper transcription factor 1	0.0741055	0.615352	0.744568	0.0460498	0.316239	1.38076	0.0437276	0.332744	0.581799	0.365956	0.756522	0.721847	0.226094	0.845682	0.459018	0.154301	1	0.82068	0.129876	0.680364	0.495316	0.0794997	0.752639	1.17913	0.0640273	0.449219	0.596191	0.382223	0.81092	0.715802
64639	BAD	BCL2-associated agonist of cell death	0.930589	1	-0.0143628	0.305564	0.632897	0.176504	0.924898	1	0.011862	0.617524	0.947749	0.10494	0.943966	1	0.0227935	0.702125	1	0.145467	0.850128	1	0.00156891	0.628398	1	-0.0963359	0.983552	1	-0.0043799	0.122366	0.52249	0.356309
297994	BAG1	BCL2-associated athanogene	0.453897	0.857902	0.244612	0.0752302	0.363144	0.414107	0.127316	0.506349	0.245572	0.0445695	0.284383	0.493517	0.613193	1	0.109016	0.710002	1	-0.0280137	0.244971	0.772776	0.204331	0.723823	1	0.150838	0.337847	0.816326	0.158477	0.187654	0.615751	0.418437
690038	BAG2	BCL2-associated athanogene 2	0.00517134	0.452792	1.13396	0.00655368	0.239995	0.749353	0.000297063	0.0515942	0.971418	2.40535e-06	0.00263358	0.787319	0.172449	0.812328	0.572956	0.847967	1	0.0974023	0.00789096	0.612323	0.88487	0.0558963	0.751369	0.558897	0.0331633	0.363092	0.763886	0.107709	0.496338	0.485363
293524	BAG3	BCL2-associated athanogene 3	0.129488	0.656564	0.540096	0.390547	0.708159	-0.057631	0.0914338	0.443227	0.400556	0.838058	1	-0.0548825	0.150863	0.792608	0.383083	0.896958	1	-0.0151117	0.16556	0.7026	0.371556	0.231974	0.885285	-0.229265	0.0557982	0.430163	0.429753	0.426307	0.836599	0.148303
361167	BAG4	BCL2-associated athanogene 4	0.332235	0.819875	-0.207445	0.895535	1	0.0164482	0.295704	0.699132	-0.148967	0.848972	1	-0.031856	0.392539	0.958022	-0.105775	0.811088	1	0.0156127	0.383089	0.875863	-0.137528	0.450296	0.998865	0.257484	0.24983	0.71455	-0.154831	0.484676	0.884867	-0.24645
366734	BAG5	BCL2-associated athanogene 5	0.152385	0.671879	0.225536	0.157857	0.47872	0.177733	0.206808	0.607231	0.106207	0.0857843	0.393034	0.160042	0.0763592	0.7404	0.184862	0.514142	1	0.0754121	0.399744	0.888377	0.0971511	0.427116	0.986638	0.0825904	0.0103327	0.265055	0.225408	0.0597202	0.434809	0.173627
94342	BAG6	BCL2-associated athanogene 6	0.324001	0.811909	0.0739216	0.979994	1	-0.00334399	0.291866	0.694278	0.14183	0.458132	0.818783	0.12003	0.83082	1	-0.0618548	0.437244	1	-0.141318	0.354966	0.862925	0.118111	0.504916	1	0.0836853	0.917736	1	-0.0175316	0.482969	0.884119	-0.0941256
362931	BAI1	brain-specific angiogenesis inhibitor 1	0.602277	0.970493	0.124408	0.298012	0.624019	0.25594	0.979681	1	0.0738674	0.931989	1	-0.0175339	0.435962	0.962785	0.132564	0.168847	1	0.338871	0.294895	0.81419	0.222278	0.724069	1	0.122142	0.863386	1	-0.0290592	0.354346	0.784763	0.240911
313058	BAI2	brain-specific angiogenesis inhibitor 2	0.861616	1	0.0175379	0.063045	0.344562	-0.67491	0.543001	0.902921	0.0620496	0.00377632	0.0715316	-0.576347	0.723635	1	-0.0493444	0.39843	1	-0.210416	0.210514	0.750989	0.110216	0.0283213	0.748688	-0.537557	0.336933	0.815284	-0.0884426	0.164251	0.588584	-0.399607
301309	BAI3	brain-specific angiogenesis inhibitor 3	0.13165	0.657819	-0.20329	0.0565108	0.333349	-0.612409	0.101728	0.461218	-0.17553	0.0677819	0.352002	-0.470093	0.403254	0.961237	-0.0711932	0.421202	1	-0.215816	0.00575181	0.612323	-0.244107	0.609608	1	-0.149633	0.702078	1	-0.0414236	0.00683914	0.217007	-0.691412
117542	BAIAP2	BAI1-associated protein 2	0.140273	0.665224	0.628027	0.0613863	0.34267	0.788503	0.00652745	0.152985	0.623299	0.00162353	0.0453257	0.658752	0.660399	1	0.170524	0.457896	1	0.206559	0.042086	0.612323	0.584031	0.115973	0.760099	0.459153	0.292703	0.769369	0.308604	0.0155459	0.287144	0.617788
304282	BAIAP2L1	BAI1-associated protein 2-like 1	0.241851	0.741504	0.152729	0.00246523	0.219304	0.742654	0.547658	0.906464	0.0444946	0.00213135	0.052757	0.526246	0.174898	0.812861	0.139504	0.122934	1	0.334358	0.649801	1	0.0443949	0.0160372	0.74747	0.507097	0.0863075	0.496441	0.169667	0.0130005	0.270244	0.522425
685357	BAIAP2L2	BAI1-associated protein 2-like 2	0.553698	0.935468	-0.0940799	0.161097	0.483179	-0.545385	0.780738	1	-0.0695725	0.362954	0.754425	-0.32527	0.841555	1	-0.10026	0.124465	1	-0.420076	0.687569	1	0.124147	0.0463583	0.750579	-0.508549	0.340872	0.818873	-0.274838	0.410785	0.826135	-0.285284
116502	BAK1	BCL2-antagonist/killer 1	0.765459	1	-0.0973257	0.0678075	0.350246	0.357333	0.537859	0.90022	-0.102774	0.260555	0.657272	0.234654	0.875037	1	-0.068786	0.192283	1	0.207542	0.432562	0.90844	-0.143814	0.583935	1	0.0971411	0.949782	1	-0.0106981	0.00783259	0.224939	0.407591
83837	BAMBI	BMP and activin membrane-bound inhibitor homolog (Xenopus laevis)	0.126811	0.656148	0.359388	0.00952832	0.245897	-0.671989	0.0586318	0.369541	0.288607	0.0437295	0.2806	-0.496319	0.233969	0.854277	0.210013	0.238219	1	-0.30637	0.0364172	0.612323	0.314355	0.0147128	0.74747	-0.593282	0.192807	0.642816	0.21124	0.287803	0.721945	-0.34627
114087	BANF1	barrier to autointegration factor 1	0.665758	1	0.15744	0.299222	0.625397	0.137348	0.284622	0.686261	0.226445	0.130488	0.474021	0.541568	0.977482	1	0.00747608	0.269387	1	-0.363872	0.335721	0.845388	0.211909	0.802697	1	0.170004	0.877075	1	0.0235047	0.877794	1	0.0265764
365948	BANK1	B-cell scaffold protein with ankyrin repeats 1	0.540827	0.927148	0.25724	0.509043	0.790888	0.26843	0.4159	0.82043	0.212043	0.987654	1	-0.0537224	0.742778	1	0.0779422	0.472232	1	0.322153	0.537594	0.952018	0.164067	0.926923	1	-0.0125122	0.548372	0.953214	0.189834	0.399523	0.819738	0.370419
292064	BANP	BTG3 associated nuclear protein	0.299766	0.791326	-0.307413	0.0602759	0.34069	-0.20471	0.146582	0.531917	-0.249917	0.0344011	0.246467	-0.279131	0.223782	0.844538	-0.21352	0.801215	1	0.0531694	0.0800154	0.646725	-0.266915	0.052586	0.751369	-0.289442	0.271367	0.743894	-0.194978	0.89283	1	0.00941186
306257	BAP1	BRCA1 associated protein-1 (ubiquitin carboxy-terminal hydrolase)	0.456109	0.859193	-0.0326516	0.197299	0.516678	0.0989628	0.088843	0.437409	-0.085812	0.680603	0.994992	-0.0284264	0.444415	0.962785	0.0337802	0.0513024	1	0.126563	0.230261	0.764843	-0.0681372	0.837541	1	0.00872274	0.778511	1	0.0181416	0.144499	0.559277	0.122952
64557	BARD1	BRCA1 associated RING domain 1	0.498515	0.894253	-0.164697	0.742132	1	-0.132058	0.12943	0.509993	-0.305508	0.740361	1	-0.106073	0.715498	1	0.0233942	0.78155	1	-0.151794	0.460191	0.928119	-0.181013	0.984974	1	-0.0306093	0.693053	1	-0.0777214	0.487627	0.887113	-0.187405
117232	BARHL1	BarH-like homeobox 1	0.0969819	0.628605	0.712459	0.166285	0.488062	0.833757	0.00630891	0.151222	0.715145	0.145768	0.500855	0.552243	0.46291	0.967226	0.31468	0.499038	1	0.315077	0.0372478	0.612323	0.624319	0.565628	1	0.315895	0.159975	0.596146	0.431415	0.0590126	0.433275	0.806969
65050	BARHL2	BarH-like homeobox 2	0.422647	0.83352	0.174788	1	1	0	0.070996	0.396721	0.261099	0.304546	0.693557	0.222992	0.788119	1	0.0010836	0.304546	1	-0.222992	0.544116	0.952018	0.117248	0.572368	1	-0.148662	0.365038	0.836812	0.144934	0.572368	0.923051	0.148662
364680	BARX1	BARX homeobox 1	0.906519	1	0.0336406	0.396921	0.708159	0.143759	0.688093	1	0.0728855	0.474605	0.83349	0.166486	0.805596	1	-0.0224246	0.954024	1	-0.0195889	0.4855	0.94481	-0.210426	0.750654	1	0.107182	0.384359	0.850361	0.260887	0.680498	0.997493	0.085542
64160	BASP1	brain abundant, membrane attached signal protein 1	0.623593	0.986236	-0.108025	0.902458	1	-0.031555	0.557943	0.914683	0.145067	0.467949	0.827107	-0.0954148	0.260452	0.859257	-0.348081	0.696647	1	0.0258563	0.915558	1	0.0394228	0.57109	1	-0.0709843	0.510529	0.951001	-0.215119	0.835122	1	0.0162431
299206	BATF	basic leucine zipper transcription factor, ATF-like	0.89765	1	-0.073561	0.745894	1	0.164351	0.849424	1	0.0648035	0.318693	0.710757	0.335102	0.612576	1	-0.207613	0.728498	1	-0.150194	0.945397	1	0.0166409	0.886288	1	0.0521272	0.692698	1	-0.137805	0.595363	0.940192	0.17386
60462	BATF3	basic leucine zipper transcription factor, ATF-like 3	0.226185	0.730708	-0.567145	0.0163479	0.260175	-0.6355	0.216861	0.62103	-0.368562	0.317879	0.709872	-0.36277	0.34527	0.921856	-0.389318	0.176024	1	-0.383727	0.339171	0.848301	-0.336222	0.0278248	0.74747	-0.645878	0.167644	0.607631	-0.48355	0.586941	0.933819	-0.238454
24887	BAX	BCL2-associated X protein	0.385267	0.83352	0.142622	0.385328	0.708159	0.164268	0.102865	0.463926	0.311736	0.581311	0.920135	0.156435	0.567398	1	-0.0962436	0.969276	1	0.0660355	0.214436	0.753088	0.260093	0.625761	1	-0.140754	0.882179	1	-0.0456405	0.279012	0.713647	0.379179
314126	BAZ1A	bromodomain adjacent to zinc finger domain, 1A	0.0105236	0.475374	0.222642	0.00396877	0.233483	0.569781	0.545207	0.90438	0.0722619	0.0566177	0.320545	0.469134	0.100118	0.758037	0.229736	0.453011	1	0.198105	0.553033	0.952964	0.0785523	0.0385563	0.750579	0.530928	0.0586862	0.43645	0.244756	0.402549	0.821697	0.261266
368002	BAZ1B	bromodomain adjacent to zinc finger domain, 1B	0.451428	0.85639	-0.157619	0.0982978	0.398359	-0.274142	0.114837	0.483532	-0.242237	0.180098	0.556638	-0.246555	0.820939	1	0.0204375	0.990835	1	-0.0520003	0.191987	0.732915	-0.221481	0.901783	1	0.00356145	0.878563	1	-0.0100715	0.0927778	0.488195	-0.377222
304601	BAZ2A	bromodomain adjacent to zinc finger domain, 2A	0.144711	0.667257	-0.395781	0.0093518	0.245897	-0.308924	0.0780765	0.413189	-0.278731	0.28062	0.680488	-0.374537	0.0874452	0.746033	-0.286914	0.741684	1	0.0133934	0.135315	0.680364	-0.250694	0.688538	1	0.140098	0.0195514	0.305511	-0.333635	0.211183	0.645683	-0.569403
317627	BAZ2B	bromodomain adjacent to zinc finger domain, 2B	0.436528	0.846704	-0.219012	0.0388517	0.308315	-0.310816	0.281769	0.682767	-0.173812	0.266943	0.664046	-0.45475	0.434956	0.962785	-0.134169	0.682465	1	0.0860413	0.507281	0.952018	-0.122029	0.688063	1	0.154468	0.183121	0.627097	-0.199644	0.234481	0.674987	-0.588187
317673	BBC3	BCL2 binding component 3	0.926457	1	-0.0195672	0.993765	1	-0.00168377	0.444911	0.834589	0.176047	0.719963	1	0.0791217	0.361633	0.934839	-0.14071	0.713796	1	-0.0176125	0.35545	0.862925	0.188339	0.729333	1	-0.0458049	0.272652	0.7455	-0.196127	0.736159	1	0.0646242
64564	BBOX1	butyrobetaine (gamma), 2-oxoglutarate dioxygenase (gamma-butyrobetaine hydroxylase) 1	0.422648	0.83352	-0.234056	0.422647	0.708159	-0.16281	0.45421	0.834589	-0.117028	0.395772	0.764011	-0.0814051	0.19768	0.817027	-0.234056	0.304546	1	-0.0814051	0.536795	0.952018	-0.117028	0.572368	1	-0.05427	0.135389	0.564287	-0.234056	0.101841	0.494263	-0.16281
309156	BBS1	Bardet-Biedl syndrome 1	0.58428	0.957956	0.10627	0.00326431	0.229211	-0.363898	0.148335	0.534599	0.177437	0.0926169	0.408888	-0.302584	0.785237	1	-0.0723375	0.768326	1	-0.125431	0.416354	0.897873	0.100789	0.762462	1	-0.0967804	0.785745	1	0.0405137	0.0489266	0.402283	-0.409789
500832	BBS10	Bardet-Biedl syndrome 10	0.120219	0.651381	-0.378202	0.0131274	0.252542	-0.859812	0.0037007	0.121901	-0.3655	0.0155693	0.159822	-0.60046	0.567483	1	-0.11996	0.279825	1	-0.402457	0.0389044	0.612323	-0.331107	0.302501	0.930551	-0.386875	0.227474	0.692021	-0.208915	0.000505012	0.104224	-0.807243
113948	BBS2	Bardet-Biedl syndrome 2	0.0841078	0.622222	-0.292787	0.0426257	0.315028	-0.715522	0.0545402	0.358617	-0.186218	0.000976279	0.0342852	-0.573533	0.0683729	0.739543	-0.229577	0.367398	1	-0.215583	0.105927	0.667355	-0.184069	0.0867353	0.752639	-0.415803	0.0106871	0.266135	-0.247316	0.0162467	0.289575	-0.562758
300754	BBS4	Bardet-Biedl syndrome 4	0.0758804	0.615352	-0.324675	0.315814	0.644573	-0.207649	0.00934041	0.175377	-0.250188	0.0744901	0.367574	-0.231446	0.222596	0.844538	-0.166232	0.68532	1	0.0446164	0.0226763	0.612323	-0.25476	0.883833	1	-0.048908	0.0781233	0.479956	-0.208721	0.191537	0.621141	-0.221018
362142	BBS5	Bardet-Biedl syndrome 5	0.838418	1	0.0471896	0.672233	0.943243	0.0823993	0.995305	1	-0.0317276	0.39652	0.764664	0.124324	0.59984	1	0.0275205	0.879313	1	0.0165543	0.551348	0.952084	0.061038	0.475476	1	0.120723	0.972244	1	-0.0152508	0.940713	1	0.00863595
361930	BBS7	Bardet-Biedl syndrome 7	0.516639	0.909204	-0.287369	0.199593	0.518942	-0.23268	0.150641	0.538326	-0.330409	0.0410992	0.271539	-0.409118	0.922096	1	0.040288	0.367627	1	0.190963	0.486378	0.945226	-0.224948	0.868083	1	0.0199901	0.500093	0.944084	-0.159128	0.194913	0.626061	-0.325388
303970	BBX	bobby sox homolog (Drosophila)	0.682579	1	-0.0779266	0.473442	0.755149	0.309411	0.784606	1	-0.0515439	0.946116	1	0.01702	0.776748	1	-0.0103139	0.587216	1	0.268952	0.850141	1	-0.0451768	0.276903	0.908975	0.774162	0.689908	1	-0.053369	0.592779	0.938481	-0.369428
29294	Bc1	brain cytoplasmic RNA 1	1	1	0	1	1	0	1	1	0	1	1	0	1	1	0	1	1	0	1	1	0	1	1	0	1	1	0	1	1	0
78958	BCAM	basal cell adhesion molecule (Lutheran blood group)	0.281474	0.774931	-0.231672	0.0624891	0.343987	-0.379567	0.789039	1	-0.0565901	0.615935	0.946574	-0.139008	0.0540347	0.726854	-0.256661	0.0833568	1	-0.335784	0.529927	0.952018	-0.082916	0.173914	0.836735	-0.271467	0.0779307	0.479187	-0.253173	0.276208	0.711514	-0.266363
25393	BCAN	brevican	0.0672454	0.60882	0.755939	0.107808	0.410769	1.47757	0.00122068	0.0808878	0.693429	0.0855565	0.392518	0.862998	0.343863	0.921487	0.348992	0.170365	1	0.738327	0.00799199	0.612323	0.660207	0.38879	0.978873	0.511461	0.124199	0.56323	0.443206	0.00263566	0.171318	1.49989
298943	BCAP29	B-cell receptor-associated protein 29	0.719971	1	0.129529	0.238788	0.558439	0.318233	0.723917	1	0.0875641	0.0922281	0.407959	0.324268	0.6375	1	0.194026	0.793282	1	0.0859784	0.57446	0.96773	0.146011	0.102341	0.752639	0.330948	0.748164	1	0.0773805	0.654301	0.978206	0.124034
293852	BCAP31	B-cell receptor-associated protein 31	0.252246	0.74849	0.0648448	0.0435878	0.315231	0.261538	0.342814	0.74963	0.0608283	0.429429	0.796468	0.0871845	0.692138	1	0.0123672	0.148429	1	0.234193	0.319443	0.835119	0.0666846	0.89937	1	0.0328116	0.652573	1	0.0225587	0.00767127	0.222938	0.335852
25414	BCAR1	breast cancer anti-estrogen resistance 1	0.0641618	0.603701	0.270268	0.721236	0.986698	-0.0419255	0.53241	0.895859	0.105322	0.455788	0.817501	-0.0581061	0.00483936	0.721469	0.278559	0.877545	1	-0.00332388	0.39951	0.888206	0.124889	0.781185	1	-0.0238834	0.0119266	0.273111	0.273339	0.718156	1	-0.0385187
310838	BCAR3	breast cancer anti-estrogen resistance 3	0.457227	0.860418	-0.196344	0.663624	0.936331	0.0755086	0.783741	1	-0.0501251	0.684285	0.997465	-0.0681836	0.159566	0.799658	-0.202376	0.312759	1	0.198335	0.869212	1	-0.0207532	0.54417	1	-0.0871046	0.0730346	0.467196	-0.259758	0.217753	0.655097	0.205997
246755	BCAS1	breast carcinoma amplified sequence 1	0.669991	1	-0.109621	0.951054	1	0.0174093	0.732203	1	-0.056408	0.237338	0.632139	-0.217069	0.746177	1	-0.0953092	0.210182	1	0.345923	0.824176	1	-0.055233	0.525428	1	0.186644	0.623527	1	-0.104961	0.574568	0.924571	-0.126284
295334	BCAS2	breast carcinoma amplified sequence 2	0.158533	0.678791	0.164526	0.864774	1	-0.0211982	0.143361	0.527867	0.193513	0.777003	1	0.0222796	0.84147	1	0.021669	0.689516	1	-0.0104527	0.176961	0.716041	0.188021	0.644248	1	-0.0721221	0.64888	1	0.0482322	0.740392	1	0.0548661
363662	BCAS3	breast carcinoma amplified sequence 3	0.120615	0.651381	-0.0907194	0.0765596	0.365417	-0.470206	0.458072	0.83788	-0.0922549	0.0184244	0.175509	-0.408392	0.797409	1	-0.0224209	0.558722	1	-0.130199	0.210731	0.750989	-0.14094	0.300553	0.930551	-0.224716	0.849648	1	0.011995	0.0502051	0.406588	-0.425021
29592	BCAT1	branched chain amino-acid transaminase 1, cytosolic	0.335841	0.822995	0.18676	0.00640663	0.239166	2.13364	0.0597573	0.372159	0.202742	8.56364e-07	0.00208476	2.08686	0.855107	1	0.05018	0.590414	1	0.427947	0.261637	0.787256	0.15006	0.042063	0.750579	1.5342	0.396831	0.859253	0.121008	0.0748865	0.459159	1.43772
64203	BCAT2	branched chain amino-acid transaminase 2, mitochondrial	0.24626	0.744476	-0.125217	0.63815	0.913021	-0.0473167	0.983889	1	0.000843406	0.124004	0.462457	0.347666	0.152968	0.794983	-0.182456	0.0749082	1	-0.412846	0.768555	1	-0.0303136	0.977051	1	0.0169093	0.238622	0.703015	-0.15544	0.847261	1	-0.0859528
361666	BCCIP	BRCA2 and CDKN1A interacting protein	0.680725	1	-0.072706	0.804509	1	-0.0413884	0.254482	0.65166	-0.141872	0.929651	1	0.0111847	0.683426	1	0.000143576	0.730388	1	-0.027447	0.327342	0.838614	-0.140591	0.548925	1	0.0665571	0.861384	1	0.0206424	0.27154	0.709216	-0.113366
363001	BCDIN3D	BCDIN3 domain containing	0.693852	1	0.0961427	0.366874	0.697229	-0.144181	0.25631	0.653661	0.256273	0.722306	1	0.0845243	0.649586	1	-0.0587332	0.0712641	1	-0.211205	0.346767	0.854567	0.208853	0.850247	1	-0.0372017	0.830964	1	-0.0468633	0.256582	0.698518	-0.149206
65036	BCHE	butyrylcholinesterase	0.795136	1	-0.042665	0.16651	0.488317	-0.434064	0.257354	0.654642	-0.173372	0.0991748	0.421604	-0.645149	0.456816	0.964575	0.111548	0.666422	1	0.166382	0.407989	0.891717	-0.143305	0.753644	1	-0.189671	0.678044	1	0.0800317	0.337958	0.770627	-0.403982
25244	BCKDHA	branched chain keto acid dehydrogenase E1, alpha polypeptide	0.042178	0.564993	-0.337871	0.0328735	0.297944	-1.04615	0.177367	0.571428	-0.161075	0.0918034	0.407033	-0.583946	0.0498604	0.721469	-0.281058	0.0647757	1	-0.574248	0.294738	0.81419	-0.166905	0.0251695	0.74747	-0.744584	0.0108739	0.267606	-0.318343	0.0689763	0.453493	-0.687634
29711	BCKDHB	branched chain keto acid dehydrogenase E1, beta polypeptide	0.64849	1	-0.0783807	0.0943933	0.392628	0.461644	0.683843	1	0.0494173	0.00918117	0.119173	0.486189	0.262525	0.861213	-0.162212	0.993803	1	0.0103212	0.878786	1	0.0399334	0.23684	0.888121	0.300113	0.345743	0.822421	-0.155912	0.161787	0.584738	0.327034
29603	BCKDK	branched chain ketoacid dehydrogenase kinase	0.142981	0.666728	-0.338411	0.783584	1	-0.0487804	0.271909	0.669453	-0.169911	0.273331	0.67241	-0.174231	0.0775033	0.7404	-0.325387	0.431995	1	0.0980876	0.288956	0.81124	-0.198719	0.249985	0.89433	-0.24576	0.0643617	0.450259	-0.304791	0.422301	0.834585	0.171599
83477	BCL10	B-cell CLL/lymphoma 10	0.620012	0.984211	-0.153928	0.00640946	0.239166	0.277412	0.643192	0.978923	-0.0940176	0.0139373	0.149844	0.202984	0.367651	0.938208	-0.142965	0.197646	1	0.115543	0.628356	1	-0.0856045	0.0374236	0.750579	0.195357	0.337331	0.815697	-0.147318	0.0696709	0.453727	0.188231
305589	BCL11A	B-cell CLL/lymphoma 11A (zinc finger protein)	0.222622	0.726894	0.264589	0.422647	0.708159	-0.16281	0.075156	0.405419	0.221702	0.550184	0.895501	-0.137202	0.354486	0.930042	0.130281	0.768414	1	-0.0256084	0.0203101	0.612323	0.27061	0.288088	0.91651	-0.207927	0.418884	0.878737	0.111307	0.964484	1	-0.0091527
314423	BCL11B	B-cell CLL/lymphoma 11B (zinc finger protein)	0.42265	0.83352	-0.0608614	0.0137182	0.252542	-0.590277	0.994957	1	-0.0694477	0.0874322	0.397801	-0.616483	0.736092	1	0.00858631	0.933598	1	-0.0944651	0.725554	1	-0.0753207	0.28138	0.91423	-0.451213	0.993268	1	-0.00582784	0.421204	0.833632	-0.376047
24224	BCL2	B-cell CLL/lymphoma 2	0.258994	0.753629	0.514792	0.261725	0.583101	0.339722	0.0630057	0.380842	0.449985	0.713044	1	0.200238	0.581728	1	0.186935	0.716285	1	0.129097	0.143738	0.68606	0.42458	0.232401	0.885463	0.620188	0.359794	0.836263	0.302519	0.732107	1	-0.170687
170929	BCL2A1	BCL2-related protein A1	0.0283669	0.540742	-0.47916	0.32388	0.65432	-0.81503	0.25254	0.650829	-0.228605	0.234637	0.628084	-0.334109	0.0359305	0.721469	-0.424017	0.163431	1	-0.449232	0.201951	0.741539	-0.270868	0.385945	0.975929	-0.34904	0.0285066	0.347507	-0.425834	0.033706	0.361494	-0.727104
24888	BCL2L1	BCL2-like 1	0.0777296	0.615352	-0.171999	0.111238	0.415434	0.311005	0.45624	0.836033	-0.0662097	0.121242	0.458106	0.265992	0.186312	0.817027	-0.164621	0.476557	1	0.100566	0.430456	0.907019	-0.0904743	0.468234	1	0.136056	0.167381	0.607394	-0.158468	0.0682216	0.452148	0.297134
114552	BCL2L10	BCL2-like 10 (apoptosis facilitator)	0.827412	1	0.0940181	0.959155	1	0.00958219	0.947188	1	-0.116779	0.291521	0.692897	0.147445	0.623952	1	0.159441	0.322127	1	-0.134725	0.523208	0.952018	-0.182837	0.997526	1	-0.000611962	0.280115	0.754089	0.291075	0.945777	1	0.0144343
64547	BCL2L11	BCL2-like 11 (apoptosis facilitator)	0.0420554	0.564993	0.501435	0.163123	0.485194	0.393167	0.0953816	0.448192	0.449649	0.387618	0.764011	0.327087	0.49969	0.990424	0.232808	0.732613	1	0.0818272	0.161939	0.700136	0.407774	0.181315	0.840681	0.496982	0.371042	0.840235	0.321147	0.962297	1	0.0324897
361567	BCL2L12	BCL2-like 12 (proline rich)	0.483934	0.88211	0.11454	0.0254727	0.285274	0.13471	0.150331	0.537731	0.122238	0.83497	1	0.0747092	0.771411	1	-0.0151304	0.451077	1	0.0790891	0.851256	1	0.0358963	0.745186	1	0.0622542	0.319368	0.797861	0.114346	0.453388	0.860565	0.123722
312682	BCL2L13	BCL2-like 13 (apoptosis facilitator)	0.0312242	0.540742	0.32604	0.143437	0.458484	0.394182	0.00115235	0.0800524	0.342613	0.611649	0.942745	0.251079	0.646684	1	0.0785392	0.518886	1	0.17254	0.0266532	0.612323	0.310874	0.177292	0.83688	0.499777	0.363776	0.836812	0.15555	0.987506	1	0.0356107
500348	BCL2L14	BCL2-like 14 (apoptosis facilitator)	0.449388	0.855188	-0.29451	0.176332	0.501323	0.389115	0.12846	0.507803	-0.326932	0.382894	0.764011	0.195923	0.747934	1	-0.103749	0.15415	1	0.258569	0.490928	0.947827	-0.166031	0.693631	1	0.0803645	0.263419	0.73361	-0.272039	0.0158843	0.28839	0.460248
295337	BCL2L15	BCL2-like 15	0.205684	0.711373	0.434801	0.313805	0.642067	-0.382905	0.600374	0.945213	0.149499	0.737178	1	-0.16074	0.115503	0.773398	0.494288	0.113637	1	-0.36921	0.882272	1	0.100143	0.107904	0.753396	-0.3926	0.0466147	0.402439	0.549253	0.594256	0.939227	-0.166954
60434	BCL2L2	BCL2-like 2	0.282443	0.775683	0.0991387	0.665723	0.938282	-0.0427252	0.0573948	0.366079	0.173599	0.113659	0.445871	-0.146227	0.734762	1	-0.0481734	0.274527	1	0.118211	0.132142	0.680364	0.149782	0.756781	1	-0.0386384	0.928016	1	-0.00883429	0.863558	1	-0.0134256
680611	BCL3	B-cell CLL/lymphoma 3	0.487635	0.884391	-0.40388	0.389824	0.708159	-0.489674	0.665652	0.997453	0.132221	0.705092	1	-0.0647625	0.0543623	0.726854	-0.759906	0.0809105	1	-0.484091	0.971909	1	-0.0233998	0.60585	1	-0.167116	0.181884	0.625893	-0.589708	0.0804599	0.469131	-0.505509
303836	BCL6	B-cell CLL/lymphoma 6	0.0427627	0.56645	0.75357	0.00114991	0.219082	0.828977	0.00686114	0.157261	0.685554	7.42596e-05	0.0104516	0.963876	0.41898	0.962785	0.372536	0.958688	1	-0.00566467	0.0948707	0.659425	0.550546	0.0709571	0.752639	0.698511	0.0955389	0.514849	0.555721	0.317189	0.751355	0.44987
360551	BCL6B	B-cell CLL/lymphoma 6, member B	0.367994	0.83352	-0.117849	0.108744	0.412085	-0.468308	0.657202	0.990194	-0.0257796	0.0102762	0.126265	-0.665299	0.132454	0.784236	-0.137587	0.78781	1	0.0714085	0.880776	1	-0.0184548	0.0839083	0.752639	-0.544318	0.0521488	0.418715	-0.15385	0.797789	1	-0.121953
368001	Bcl7b	B-cell CLL/lymphoma 7B	0.0842676	0.622475	0.10458	0.752645	1	0.0266157	0.230868	0.637786	0.137794	0.342281	0.734231	0.156202	0.997181	1	-0.00827757	0.445407	1	-0.118996	0.301071	0.819814	0.130761	0.916519	1	-0.00697384	0.786467	1	0.0169908	0.761256	1	0.0459917
293514	BCL7C	B-cell CLL/lymphoma 7C	0.607649	0.974282	0.19456	0.838743	1	0.0192077	0.31334	0.716843	0.354352	0.532285	0.880848	0.177279	0.877509	1	-0.0269628	0.569398	1	-0.143911	0.232644	0.766057	0.388841	0.614355	1	-0.177625	0.828169	1	-0.0851514	0.57157	0.923051	0.207956
300673	BCL9L	B-cell CLL/lymphoma 9-like	0.0482324	0.577089	0.219178	0.222577	0.539513	0.109098	0.0169726	0.223467	0.35182	0.809791	1	0.146745	0.79693	1	-0.0473936	0.856874	1	-0.0396959	0.0460455	0.612323	0.32415	0.240503	0.889225	0.350826	0.955864	1	-0.00349679	0.487246	0.886612	-0.206045
293017	BCLAF1	BCL2-associated transcription factor 1	0.220466	0.7253	-0.298367	0.0498127	0.321849	0.150019	0.0854102	0.430591	-0.264477	0.537478	0.886058	0.249533	0.245544	0.857365	-0.18542	0.892662	1	-0.0858353	0.065216	0.62404	-0.261367	0.134042	0.785905	0.521513	0.20221	0.657138	-0.186965	0.364299	0.796815	-0.316928
114106	BCMO1	beta-carotene 15,15'-monooxygenase 1	0.0297898	0.540742	0.657883	0.00211228	0.219304	1.44752	0.0735958	0.402484	0.478996	0.000425053	0.0232498	1.13405	0.0843004	0.745898	0.414854	0.199627	1	0.572119	0.024016	0.612323	0.548486	0.0124275	0.74747	1.03059	0.109704	0.53615	0.407347	0.0164178	0.289575	0.985655
315644	BCO2	beta-carotene oxygenase 2	0.79501	1	-0.0333533	0.843074	1	-0.0155641	0.719313	1	-0.0711233	0.128561	0.471447	-0.189314	0.937295	1	0.0196657	0.174803	1	0.158068	0.199657	0.739486	-0.122377	0.821407	1	-0.037473	0.420525	0.880012	0.0718709	0.945246	1	0.0114937
317346	BCOR	BCL6 corepressor	0.122445	0.654485	0.214179	0.106845	0.40963	0.180751	0.275443	0.67445	0.0971992	0.634574	0.961066	0.088709	0.131624	0.784236	0.165351	0.285561	1	0.128287	0.502397	0.952018	0.071277	0.114093	0.758153	0.210931	0.0140546	0.284092	0.230419	0.838184	1	0.0421512
302810	BCORL1	BCL6 corepressor-like 1	0.436042	0.846052	0.20464	0.274431	0.597019	-0.183253	0.934644	1	0.0192866	0.0589648	0.327939	-0.340256	0.0476768	0.721469	0.321522	0.452177	1	0.135595	0.803975	1	0.0583721	0.625379	1	-0.114493	0.128495	0.564287	0.25987	0.526527	0.916603	-0.13698
301514	BCS1L	BC1 (ubiquinol-cytochrome c reductase) synthesis-like	0.0927959	0.626221	0.158852	0.0648866	0.346455	0.366135	0.0301865	0.284177	0.261302	0.025895	0.212117	0.351107	0.634679	1	-0.0663627	0.813584	1	0.043532	0.120639	0.680364	0.224561	0.365974	0.965223	0.166252	0.908859	1	-0.00072867	0.0958175	0.493131	0.331429
117099	BDH1	3-hydroxybutyrate dehydrogenase, type 1	0.0619225	0.602708	0.656711	3.90292e-05	0.147302	0.602596	0.000841473	0.0733487	0.675852	7.20253e-06	0.0043709	0.58653	0.530782	1	0.208289	0.574541	1	0.117744	0.0316685	0.612323	0.560737	0.0794293	0.752639	0.406395	0.186181	0.632097	0.390688	0.0639875	0.443512	0.430959
295458	BDH2	3-hydroxybutyrate dehydrogenase, type 2	0.500316	0.895313	-0.182816	0.277202	0.600362	0.146059	0.634401	0.972357	0.0579804	0.369803	0.760137	0.153779	0.0749337	0.7404	-0.282028	0.981579	1	0.0465556	0.663898	1	-0.0663615	0.542192	1	-0.105581	0.391265	0.854609	-0.191137	0.0876006	0.477908	0.318418
81509	BDKRB1	bradykinin receptor B1	0.152048	0.671842	-0.258388	0.16497	0.486833	0.199936	0.623024	0.964084	-0.165614	0.102165	0.427123	0.254934	0.219955	0.841684	-0.216974	0.917537	1	-0.0293661	0.0758513	0.642746	-0.340241	0.86177	1	0.0341147	0.855846	1	-0.0456753	0.150977	0.568148	0.241011
25245	BDKRB2	bradykinin receptor B2	0.983184	1	0.00611809	0.672964	0.943801	-0.0880981	0.536065	0.898716	0.0906318	0.932696	1	0.0201911	0.570678	1	-0.12059	0.655999	1	-0.149332	0.42341	0.902009	0.121561	0.27529	0.907687	-0.308268	0.455051	0.906528	-0.125429	0.511747	0.904708	0.177123
24225	BDNF	brain-derived neurotrophic factor	0.008856	0.471776	0.805126	0.0175699	0.263874	0.859063	0.00584807	0.14642	0.659483	0.00292285	0.0618338	0.768076	0.303833	0.894627	0.401775	0.650799	1	0.212518	0.0821892	0.646725	0.562051	0.0261324	0.74747	0.736291	0.0369655	0.37427	0.596828	0.209592	0.644171	0.449637
294687	BDP1	B double prime 1, subunit of RNA polymerase III transcription initiation factor IIIB	0.692759	1	0.215971	0.279089	0.602089	0.347156	0.502512	0.87476	0.180983	0.914886	1	0.205866	0.818565	1	0.0774353	0.613361	1	0.277802	0.456834	0.925901	0.216086	0.251837	0.894679	0.718267	0.84987	1	0.0860248	0.664851	0.985348	-0.209889
114558	BECN1	beclin 1, autophagy related	0.6327	0.993948	-0.0591071	0.777764	1	0.013338	0.979251	1	0.00237719	0.670111	0.985889	0.02103	0.332422	0.912795	-0.110801	0.924322	1	-0.0160443	0.844822	1	0.0119218	0.330807	0.945856	0.0441132	0.236662	0.701665	-0.10717	0.545787	0.923051	-0.0291133
79146	BEGAIN	brain-enriched guanylate kinase-associated	0.481024	0.879425	0.181918	0.35372	0.684762	-0.425898	0.563082	0.918423	0.188169	0.815151	1	-0.118682	0.428657	0.962785	0.134885	0.0938652	1	-0.405146	0.237345	0.76961	0.221417	0.43714	0.991392	-0.1977	0.759991	1	0.0681856	0.193957	0.624757	-0.402807
362564	BEND5	BEN domain containing 5	0.415568	0.83352	0.0851434	0.519513	0.801302	-0.0974983	0.0553753	0.360229	0.2842	0.588082	0.92586	0.0657074	0.260961	0.859774	-0.15841	0.172518	1	-0.144972	0.380876	0.874535	0.175404	0.688087	1	-0.0413587	0.864289	1	-0.0483309	0.632537	0.963688	-0.0825611
363212	BEND6	BEN domain containing 6	0.090581	0.626221	-0.423627	0.990377	1	-0.00155039	0.249896	0.650829	-0.379429	0.507836	0.859342	-0.17545	0.305881	0.896276	-0.224361	0.514308	1	0.158266	0.128246	0.680364	-0.398108	0.276159	0.908426	-0.218567	0.451138	0.903733	-0.226782	0.281021	0.714735	0.211288
361275	BEND7	BEN domain containing 7	0.516868	0.909513	-0.146002	0.451397	0.733521	-0.133403	0.171948	0.563923	-0.260651	0.319574	0.711353	-0.309643	0.761291	1	0.0545815	0.532275	1	0.135453	0.237517	0.769727	-0.238193	0.645016	1	0.147058	0.961754	1	0.0235012	0.384714	0.813129	-0.338525
293735	BEST1	bestrophin 1	0.191197	0.702183	0.628925	0.0186021	0.266428	-0.380127	0.0261351	0.269419	0.649926	0.102877	0.428152	-0.465352	0.553425	1	0.248099	0.871662	1	0.0128425	0.0591266	0.622712	0.59146	0.173132	0.836735	-0.429892	0.290145	0.765954	0.336806	0.818685	1	-0.101072
364973	BEST2	bestrophin 2	0.422647	0.83352	0.174788	0.695957	0.964131	0.105969	0.762261	1	0.0904915	0.649625	0.971747	0.0529845	0.252913	0.857365	0.171691	0.892442	1	0.0529845	0.532338	0.952018	0.11859	0.180116	0.838773	0.280386	0.365127	0.836812	0.143592	0.567421	0.923051	-0.139094
314847	BEST3	bestrophin 3	0.468368	0.870396	0.229367	0.0694473	0.35375	-0.222877	0.0717019	0.399011	0.30598	0.356623	0.748126	-0.28494	0.99089	1	-0.00107876	0.81944	1	0.0310523	0.108168	0.671078	0.293457	0.486784	1	0.262276	0.873642	1	0.0375438	0.127767	0.532928	-0.569783
29631	BET1	Bet1 golgi vesicular membrane trafficking protein	0.799663	1	-0.00539271	0.290794	0.615868	0.079577	0.262579	0.659003	-0.138278	0.11316	0.445436	0.180453	0.294566	0.887809	0.133892	0.355664	1	-0.0944921	0.412229	0.895213	-0.100979	0.343281	0.950118	0.163691	0.451356	0.903853	0.0941242	0.786868	1	-0.0554599
54400	BET1L	Bet1 golgi vesicular membrane trafficking protein-like	1	1	0.3019	0.168499	0.490688	0.101833	0.370388	0.778468	0.104835	0.360245	0.751905	0.128392	0.0276628	0.721469	0.267635	0.996963	1	0.00602621	0.545847	0.952018	0.0886121	0.757428	1	0.0481875	0.00150061	0.16504	0.337444	0.488524	0.887858	0.0984515
501625	Bex1	brain expressed gene 1	0.109595	0.644353	0.862857	0.213286	0.530047	0.387802	0.00395152	0.12535	0.792024	0.0994777	0.422108	0.391067	0.424205	0.962785	0.376772	0.971892	1	0.0883419	0.0267211	0.612323	0.734817	0.510368	1	0.219937	0.149602	0.584716	0.517638	0.250335	0.691629	0.327668
363498	BEX2	brain expressed X-linked 2	0.277587	0.770571	0.405232	0.213632	0.530266	-0.240537	0.0384612	0.313995	0.504695	0.939914	1	0.00285118	0.919653	1	0.0608509	0.274253	1	-0.248734	0.0759273	0.642746	0.468014	0.440714	0.992915	-0.209405	0.613108	0.995351	0.125734	0.733962	1	-0.113093
304709	BFAR	bifunctional apoptosis regulator	0.198873	0.707977	0.112948	0.117075	0.423131	0.304682	0.914114	1	0.0200004	0.327966	0.719294	0.188298	0.131444	0.784236	0.149289	0.2889	1	0.199145	0.694401	1	0.0330831	0.15057	0.810584	0.243772	0.177382	0.620673	0.136295	0.38441	0.812901	0.190058
25394	BFSP1	beaded filament structural protein 1, filensin	0.0534274	0.588531	-0.731984	0.0668961	0.349504	-0.451453	0.0102962	0.184377	-0.52208	0.193492	0.576809	-0.183443	0.0991803	0.758037	-0.428249	0.0430345	1	-0.299727	0.0372457	0.612323	-0.502724	0.227477	0.88064	-0.210973	0.0134259	0.279559	-0.546036	0.00616647	0.214577	-0.401537
25295	BGLAP	bone gamma-carboxyglutamate (gla) protein	0.630095	0.992328	0.196361	0.18616	0.507917	-0.296228	0.627722	0.96708	-0.0239778	0.957545	1	0.0281396	0.155468	0.796944	0.444826	0.0980487	1	-0.404413	0.885174	1	0.0462232	0.883876	1	0.028614	0.425701	0.884941	0.290421	0.0542819	0.41848	-0.450266
25181	BGN	biglycan	0.567653	0.945996	-0.15875	0.0428017	0.315142	-0.633587	0.879966	1	-0.0386955	0.18787	0.568281	-0.316005	0.261093	0.860043	-0.225013	0.029133	1	-0.468246	0.512245	0.952018	-0.127446	0.161146	0.825481	-0.318024	0.493122	0.938172	-0.119207	0.00276278	0.173391	-0.57698
25334	BHLHA15	basic helix-loop-helix family, member a15	0.376114	0.83352	0.165269	0.509875	0.791394	0.0776582	0.676527	1	0.0299068	0.141546	0.49363	0.220083	0.472873	0.972928	0.1496	0.410949	1	-0.150555	0.666982	1	-0.0887398	0.626721	1	0.0794667	0.0775759	0.478839	0.313844	0.925079	1	0.0213674
317407	BHLHB9	basic helix-loop-helix domain containing, class B, 9	0.10836	0.643751	-0.0789008	0.798334	1	-0.0423478	0.241797	0.649494	-0.161952	0.727887	1	-0.0326688	0.761408	1	0.0526356	0.894889	1	0.01352	0.405206	0.890752	-0.116542	0.698126	1	0.0421908	0.986893	1	0.00120267	0.346953	0.778988	-0.0909215
365748	BHLHE22	basic helix-loop-helix family, member e22	0.0197778	0.510326	-0.385837	0.816692	1	0.0602246	0.704681	1	-0.0884739	0.254031	0.65018	0.199694	0.00147157	0.721469	-0.409435	0.455711	1	-0.149831	0.182197	0.722358	-0.254324	0.5137	1	0.137266	0.118679	0.554455	-0.297483	0.816199	1	-0.060421
499952	BHLHE23	basic helix-loop-helix family, member e23	0.422647	0.83352	0.191751	0.42265	0.708159	-0.097386	0.313679	0.717149	0.0930706	0.222198	0.610328	-0.229139	0.766432	1	0.0986808	0.525689	1	0.131753	0.8361	1	0.0450955	0.961687	1	0.0206541	1	1	0.210573	0.529799	0.917174	-0.150502
79431	BHLHE40	basic helix-loop-helix family, member e40	0.204469	0.710635	0.532376	0.0157806	0.256714	0.760126	0.159795	0.549479	0.503979	0.0136131	0.148221	0.719518	0.605092	1	0.279268	0.541992	1	0.194223	0.558538	0.956547	0.245738	0.077688	0.752639	0.602702	0.149298	0.584716	0.54772	0.214386	0.649364	0.462004
81508	BHMT	betaine--homocysteine S-methyltransferase	0.523831	0.914517	0.148018	0.184179	0.50555	-0.357664	0.181647	0.578838	0.173997	0.0611978	0.334467	-0.296269	0.791053	1	0.0419737	0.581271	1	-0.147165	0.140983	0.685269	0.18406	0.243779	0.891081	-0.226103	0.781383	1	0.0359477	0.148463	0.564295	-0.279373
365972	BHMT2	betaine--homocysteine S-methyltransferase 2	1	1	0	0.422647	0.708159	-0.171541	1	1	0	0.805773	1	0.0167879	1	1	0	0.114574	1	-0.2741	1	1	0	0.398133	0.979785	-0.154143	1	1	0	0.574776	0.924571	-0.103169
361832	BICC1	bicaudal C homolog 1 (Drosophila)	0.297643	0.790157	-0.422851	0.239678	0.559578	-0.154253	0.141812	0.525357	-0.304614	0.517918	0.868407	-0.214928	0.308993	0.89779	-0.224199	0.782591	1	0.0240552	0.256373	0.784077	-0.277132	0.549361	1	0.242089	0.128783	0.564287	-0.32199	0.304856	0.737522	-0.459966
362466	BICD1	bicaudal D homolog 1 (Drosophila)	0.783083	1	0.0812142	1	1	0.0819051	0.789919	1	-0.0331675	0.688251	0.999881	-0.151106	0.453098	0.962785	0.207836	0.563273	1	0.233587	0.931757	1	0.00848926	0.409495	0.982268	0.413122	0.670499	1	0.130948	0.533093	0.917174	-0.303723
306809	BICD2	bicaudal D homolog 2 (Drosophila)	0.178864	0.69949	0.240103	0.60453	0.881525	0.0875398	0.400058	0.805731	0.134831	0.35039	0.743374	-0.0829859	0.082017	0.745898	0.228225	0.107689	1	0.221739	0.310812	0.82843	0.12476	0.613026	1	0.0766531	0.0624502	0.44631	0.236362	0.866424	1	0.0571378
64625	BID	BH3 interacting domain death agonist	0.434485	0.845535	-0.311571	0.846948	1	0.0449375	0.491063	0.866397	-0.199659	0.749666	1	-0.0154538	0.320077	0.905467	-0.264916	0.584971	1	0.0877452	0.324511	0.83792	-0.254322	0.432118	0.988946	0.194652	0.425354	0.884682	-0.212107	0.598806	0.942426	-0.125617
114496	BIK	BCL2-interacting killer (apoptosis-inducing)	0.97547	1	-0.00909234	0.237572	0.556869	-0.216906	0.738453	1	0.0131029	0.63231	0.959822	-0.111898	0.70458	1	-0.13571	0.648897	1	-0.103869	0.955944	1	0.00825591	0.15749	0.822361	-0.372805	0.993894	1	-0.0582172	0.779032	1	0.0839774
117028	BIN1	bridging integrator 1	0.015224	0.509491	0.290653	0.66054	0.933511	0.0172869	0.17731	0.571428	0.163207	0.847051	1	-0.066591	0.046456	0.721469	0.222256	0.764567	1	0.0980472	0.347191	0.854567	0.126894	0.275566	0.908242	-0.201429	0.000638682	0.13597	0.292247	0.223972	0.66277	0.229201
366988	BIN2	bridging integrator 2	0.177377	0.69949	0.215889	0.280509	0.603774	-0.318736	0.123743	0.499335	0.190949	0.287322	0.68878	-0.204936	0.358981	0.933002	0.0868584	0.708077	1	-0.155548	0.219758	0.757251	0.14514	0.307963	0.933582	-0.276784	0.166973	0.60669	0.163351	0.544604	0.922807	-0.162113
494244	Gm1110	predicted gene 1110	0.192914	0.702817	-0.552777	0.196625	0.516678	0.434485	0.10306	0.464174	-0.486982	0.540702	0.88782	0.145725	0.332822	0.913009	-0.342183	0.015906	1	0.377668	0.00995735	0.612323	-0.661255	0.101683	0.752639	0.301876	0.580192	0.973029	-0.167909	0.11843	0.51701	0.307074
361065	BIN3	bridging integrator 3	0.906863	1	-0.0185751	0.0387505	0.308315	0.550626	0.792416	1	-0.0146852	0.0124662	0.141438	0.544341	0.982636	1	-0.0075964	0.72564	1	0.14089	0.718444	1	-0.0323491	0.182034	0.84103	0.369247	0.917486	1	0.00634673	0.107562	0.496338	0.409789
60371	BIRC2	baculoviral IAP repeat containing 2	0.445327	0.851626	0.0789759	0.42029	0.708159	0.110494	0.792683	1	-0.0415793	0.804669	1	0.0641211	0.163863	0.803969	0.131954	0.515932	1	0.0860305	0.806715	1	-0.0329246	0.121518	0.76771	0.211602	0.139714	0.571928	0.142026	0.63655	0.966086	-0.0510577
78971	BIRC3	baculoviral IAP repeat containing 3	0.135803	0.661782	-0.741677	0.743177	1	0.14997	0.234806	0.64175	-0.387903	0.38087	0.764011	0.24665	0.0242435	0.721469	-0.660039	0.859999	1	-0.0808634	0.157514	0.697952	-0.449506	0.261704	0.900187	0.301198	0.0262138	0.33763	-0.641485	0.734061	1	-0.0959663
64041	Birc5	baculoviral IAP repeat-containing 5	0.651061	1	-0.173137	0.444655	0.728263	0.331629	0.247812	0.650829	-0.195506	0.0732909	0.365265	0.480204	0.937484	1	-0.00204244	0.666386	1	-0.199489	0.382993	0.875863	-0.163657	0.539681	1	0.171423	0.724853	1	-0.0753294	0.434487	0.843419	0.253777
313876	BIRC6	baculoviral IAP repeat containing 6	0.407289	0.83352	-0.0898424	0.184381	0.505637	-0.0913392	0.198149	0.595322	-0.117282	0.528503	0.877911	-0.103594	0.987915	1	0.00267579	0.920466	1	-0.00657309	0.535682	0.952018	-0.0698168	0.455676	0.999891	0.139405	0.497063	0.941507	-0.0582277	0.166853	0.591488	-0.267467
171113	BLCAP	bladder cancer associated protein	0.1328	0.658185	-0.121267	0.789821	1	0.0357557	0.430696	0.834589	-0.0721893	0.704522	1	0.0603112	0.366007	0.937733	-0.103515	0.93587	1	0.0208934	0.766756	1	-0.0240388	0.86471	1	-0.00660636	0.100323	0.52174	-0.155797	0.612989	0.951965	0.0694302
266609	C11orf68	chromosome 11 open reading frame 68	0.610868	0.976796	-0.127163	0.00184052	0.219304	-0.287997	0.883543	1	-0.0305759	0.472517	0.832057	-0.142062	0.441267	0.962785	-0.164485	0.28233	1	-0.192085	0.914614	1	-0.0066244	0.175097	0.836735	-0.245359	0.366659	0.836925	-0.185559	0.502014	0.89747	-0.154021
364403	BLK	B lymphoid tyrosine kinase	0.422648	0.83352	-0.354796	0.422647	0.708159	-0.186123	0.263296	0.659762	-0.299791	0.222754	0.611242	-0.362441	0.600593	1	-0.232403	0.621454	1	0.176318	0.375293	0.870696	-0.299791	0.215204	0.869424	-0.404031	0.389098	0.853251	-0.232403	0.648427	0.97387	0.155867
287552	BLMH	bleomycin hydrolase	0.338905	0.825334	0.117376	0.00663627	0.240972	0.361541	0.913536	1	0.00274458	0.111244	0.441487	0.297299	0.0665482	0.739543	0.118797	0.470282	1	0.134253	0.830078	1	0.00892686	0.473586	1	0.131437	0.0487467	0.409598	0.148963	0.0535316	0.417169	0.373955
499356	BLNK	B-cell linker	0.802027	1	-0.0557596	0.0682405	0.351409	-0.640951	0.80471	1	-0.0413753	0.0157922	0.160291	-0.546526	0.699881	1	-0.05417	0.588089	1	-0.140303	0.563078	0.959983	-0.0714382	0.0303628	0.748984	-0.553663	0.922579	1	-0.0161699	0.304618	0.737498	-0.316231
288785	BLOC1S1	biogenesis of lysosomal organelles complex-1, subunit 1	0.663347	1	0.140289	0.107287	0.410417	-0.37762	0.299495	0.703115	0.271351	0.647145	0.969721	-0.179271	0.821614	1	-0.0426109	0.39343	1	-0.219613	0.322571	0.836933	0.253471	0.214721	0.868603	-0.401253	0.918445	1	-0.0369358	0.814496	1	-0.109328
293938	BLOC1S2	biogenesis of lysosomal organelles complex-1, subunit 2	0.169079	0.690414	0.123229	0.95731	1	0.0127491	0.203201	0.602736	0.179616	0.504622	0.856816	0.135042	0.992692	1	-0.0027335	0.543659	1	-0.0512186	0.147009	0.690644	0.194646	0.68601	1	-0.0696169	0.992182	1	-0.0124562	0.638116	0.967036	0.110307
364183	BLOC1S4	biogenesis of lysosomal organelles complex-1, subunit 4, cappuccino	0.420342	0.83352	-0.322086	0.16303	0.485194	-0.370335	0.594918	0.941725	-0.126213	0.373419	0.76341	-0.238046	0.135427	0.785112	-0.292124	0.353631	1	-0.167389	0.478304	0.940747	-0.141111	0.063048	0.751369	-0.424538	0.131906	0.564287	-0.32042	0.781772	1	-0.0809417
306868	BLOC1S5	biogenesis of lysosomal organelles complex-1, subunit 5, muted	0.606301	0.972779	-0.0739775	0.661918	0.934544	-0.0762078	0.227247	0.633589	-0.0922293	0.837815	1	-0.0269139	0.949499	1	0.00847196	0.59329	1	-0.0358908	0.328105	0.838614	-0.0793119	0.296181	0.925429	-0.125454	0.764672	1	-0.0225847	0.843301	1	0.0283111
317630	BLOC1S6	biogenesis of lysosomal organelles complex-1, subunit 6, pallidin	0.125997	0.656148	-0.379826	0.00763572	0.245683	-0.650298	0.0318915	0.290583	-0.310582	0.00111109	0.0361587	-0.624624	0.13313	0.784236	-0.243553	0.76203	1	-0.123936	0.0172657	0.612323	-0.321129	0.10241	0.752639	-0.461411	0.0998363	0.521253	-0.24341	0.0825332	0.471342	-0.438406
116599	BLVRA	biliverdin reductase A	0.346106	0.832941	-0.127569	0.504865	0.787433	0.205768	0.870186	1	0.000493172	0.205376	0.593168	0.252836	0.396373	0.959676	-0.139372	0.763979	1	-0.0364209	0.99819	1	0.0258728	0.936845	1	-0.0034926	0.271387	0.743894	-0.199735	0.25314	0.695607	0.281399
292737	BLVRB	biliverdin reductase B (flavin reductase (NADPH))	0.383872	0.83352	0.20924	0.143219	0.458377	0.373095	0.0516013	0.35196	0.243731	0.716091	1	0.136136	0.723111	1	0.0982529	0.412127	1	0.260101	0.0841245	0.649457	0.222177	0.550889	1	-0.259577	0.465876	0.91668	0.101058	0.0348627	0.363473	0.764751
498266	BLZF1	basic leucine zipper nuclear factor 1	0.976699	1	0.00544419	0.193183	0.5138	0.127152	0.53247	0.895859	-0.0672044	0.096997	0.416664	0.159743	0.487785	0.982622	0.0654717	0.908874	1	0.0103616	0.579357	0.971157	-0.0598819	0.0507847	0.751369	0.176597	0.532231	0.953214	0.0647485	0.985349	1	0.0072571
246142	BMF	Bcl2 modifying factor	0.076937	0.615352	1.33902	0.032777	0.297902	0.815971	0.0813789	0.419944	0.848404	0.0333593	0.241851	0.63618	0.0998228	0.758037	0.969393	0.303231	1	0.283195	0.176697	0.716041	0.744484	0.011399	0.74747	0.754297	0.0100722	0.264772	1.20047	0.261565	0.701134	0.368132
307151	COMMD3-BMI1	COMMD3-BMI1 readthrough	0.408794	0.83352	-0.149337	0.872758	1	0.0285895	0.193334	0.595322	-0.192913	0.548189	0.893706	-0.135421	0.904399	1	0.0302318	0.487212	1	0.168673	0.498029	0.952018	-0.132665	0.47529	1	0.228045	0.586471	0.97707	-0.070899	0.542944	0.922139	-0.188372
83470	BMP1	bone morphogenetic protein 1	0.757529	1	0.0852585	0.198277	0.517257	-0.23328	0.239019	0.646411	0.199958	0.870522	1	-0.0203194	0.577386	1	-0.115157	0.0461178	1	-0.285713	0.543258	0.952018	0.125195	0.517434	1	-0.103424	0.98248	1	-0.0116689	0.126517	0.530822	-0.231867
500245	BMP10	bone morphogenetic protein 10	0.422648	0.83352	0.274186	0.422647	0.708159	-0.186123	0.19768	0.595322	0.274186	0.395772	0.764011	-0.0930616	0.45421	0.962785	0.137093	0.304546	1	-0.0930616	0.135389	0.680364	0.274186	0.572368	1	-0.0620411	0.536795	0.953214	0.137093	0.101841	0.494263	-0.186123
59302	BMP15	bone morphogenetic protein 15	1	1	0	0.943015	1	0.0197449	0.45421	0.834589	-0.0842966	0.839361	1	0.00987244	0.45421	0.962785	0.0842966	0.963194	1	0.00987244	0.550415	0.952018	-0.0561977	0.427517	0.986638	0.128285	0.550415	0.953214	0.0561977	0.540092	0.920231	-0.101958
29373	BMP2	bone morphogenetic protein 2	0.00896169	0.471776	2.31035	0.606718	0.883942	0.202669	0.000344768	0.0567166	1.93616	0.358268	0.750055	0.162616	0.170534	0.811906	1.13863	0.910879	1	-0.02015	0.004347	0.612323	1.88958	0.646451	1	0.098295	0.0738683	0.468803	1.44571	0.506846	0.901	0.151863
25667	BMP3	bone morphogenetic protein 3	0.591646	0.96296	0.054968	0.0401839	0.312195	0.802029	0.319834	0.725366	-0.0832544	0.0613215	0.334928	0.495018	0.104967	0.765031	0.180003	0.189964	1	0.391486	0.798643	1	0.032784	0.0617068	0.751369	0.557666	0.741354	1	0.0544336	0.0959118	0.493319	0.539864
25296	BMP4	bone morphogenetic protein 4	0.508955	0.902945	-0.168641	0.248201	0.568775	-0.153166	0.754135	1	0.0292512	0.119114	0.455333	-0.359151	0.287409	0.881927	-0.344091	0.511964	1	0.205985	0.803073	1	-0.0781922	0.671442	1	-0.0975577	0.606577	0.9909	-0.195395	0.714892	1	-0.106664
315824	BMP5	bone morphogenetic protein 5	0.678872	1	-0.0834719	0.668954	0.940787	-0.10421	0.401339	0.806471	-0.106193	0.0887778	0.400182	-0.267261	0.828629	1	0.0529143	0.347248	1	0.14727	0.993492	1	-0.0104314	0.918236	1	-0.0322526	0.518867	0.953214	-0.0907999	0.540143	0.920231	-0.111954
25644	BMP6	bone morphogenetic protein 6	0.74491	1	-0.0669401	0.507633	0.789735	0.160533	0.546671	0.905711	0.0818385	0.889057	1	0.000208078	0.181185	0.817027	-0.161095	0.323057	1	0.173308	0.802069	1	0.0371052	0.586373	1	0.131213	0.339921	0.817896	-0.130464	0.699598	1	0.0871594
85272	BMP7	bone morphogenetic protein 7	0.14327	0.666728	-0.446376	0.00526937	0.235112	-0.444198	0.155244	0.544104	-0.293058	0.602723	0.936927	-0.105783	0.177359	0.814961	-0.310962	0.00443541	1	-0.421763	0.427261	0.90467	-0.184013	0.279502	0.912738	-0.204281	0.0119074	0.273111	-0.463703	0.0136535	0.274845	-0.415766
680931	BMP8B	bone morphogenetic protein 8b	0.0806804	0.615693	1.15325	0.307281	0.634303	0.375172	0.000558367	0.065885	1.32879	0.588187	0.925886	0.221806	0.751165	1	0.231817	0.354103	1	0.30568	0.0240465	0.612323	1.16395	0.946204	1	0.070609	0.366744	0.836925	0.509507	0.102524	0.494263	0.480391
300455	BMPER	BMP binding endothelial regulator	0.125723	0.656148	0.84268	0.635842	0.910944	-0.0602983	0.0225026	0.250789	0.601329	0.754302	1	-0.00445656	0.20086	0.820757	0.474721	0.941765	1	-0.0467921	0.0523037	0.618368	0.615897	0.906242	1	0.0381592	0.0598735	0.440257	0.585466	0.580772	0.929256	-0.11554
81507	BMPR1A	bone morphogenetic protein receptor, type IA	0.154552	0.674252	-0.276695	0.244981	0.564857	0.141784	0.0805879	0.418961	-0.330262	0.915104	1	-0.0116658	0.950451	1	-0.000915387	0.569877	1	0.148867	0.278321	0.803358	-0.249345	0.342262	0.949831	0.313736	0.463667	0.915166	-0.137743	0.675272	0.994025	-0.126219
310914	Bmpr1b	bone morphogenetic protein receptor, type IB	0.330899	0.818952	-0.546207	0.750559	1	-0.0488805	0.0678387	0.390858	-0.608583	0.458469	0.819107	-0.240011	0.653859	1	-0.22223	0.577528	1	0.196398	0.0908104	0.656992	-0.567916	0.565545	1	0.239849	0.484658	0.930817	-0.255229	0.439818	0.848492	-0.303267
140590	BMPR2	bone morphogenetic protein receptor, type II (serine/threonine kinase)	0.937063	1	0.0126982	0.617087	0.893698	0.0850661	0.525977	0.891225	-0.0674053	0.784471	1	-0.0574938	0.442797	0.962785	0.120337	0.627134	1	0.153988	0.833929	1	-0.0327862	0.335464	0.946835	0.417186	0.728928	1	0.0631283	0.473653	0.876963	-0.299955
362426	BMS1	BMS1 homolog, ribosome assembly protein (yeast)	0.304281	0.794347	0.183641	0.152618	0.471447	0.0764582	0.468631	0.847667	0.0646807	0.416516	0.784134	0.0750303	0.12328	0.779366	0.146564	0.87248	1	0.0207201	0.61782	0.995364	0.0476616	0.245976	0.891168	0.1066	0.0281284	0.344623	0.206394	0.927416	1	0.0017747
367786	BMX	BMX non-receptor tyrosine kinase	0.446385	0.8525	-0.387407	0.99708	1	-0.00108369	0.959146	1	-0.0098063	0.582733	0.921387	-0.117979	0.0862631	0.745898	-0.571304	0.587567	1	0.116895	0.689082	1	-0.153657	0.897632	1	0.044707	0.16696	0.60669	-0.427453	0.892046	1	-0.0461519
311807	Bmyc	brain expressed myelocytomatosis oncogene	0.088854	0.624514	0.486385	0.00786554	0.245683	-0.15856	0.0105487	0.185134	0.641692	0.334032	0.725237	0.231482	0.917049	1	-0.00343514	0.0975884	1	-0.412851	0.0244781	0.612323	0.624083	0.693127	1	-0.0972074	0.747284	1	0.075054	0.780387	1	-0.121809
365299	BNC1	basonuclin 1	0.201428	0.709066	0.444227	0.422647	0.708159	-0.171541	0.094261	0.447775	0.332133	0.652106	0.973485	0.0517592	0.624769	1	0.199488	0.210226	1	-0.309071	0.455722	0.924362	0.220265	0.119968	0.76771	-0.417017	0.122299	0.561018	0.40117	0.531069	0.917174	0.159705
298189	BNC2	basonuclin 2	0.527215	0.916694	0.158697	0.445261	0.729068	0.385184	0.37787	0.786211	0.129267	0.103569	0.430293	0.609213	0.753963	1	0.0335024	0.702211	1	-0.228429	0.151702	0.694539	0.228235	0.109422	0.754922	0.603673	0.935627	1	-0.0152818	0.823336	1	-0.091561
140932	BNIP1	BCL2/adenovirus E1B 19kDa interacting protein 1	0.331899	0.819687	0.231304	0.647626	0.921932	0.130291	0.0842982	0.428515	0.316893	0.194117	0.577838	0.342883	0.953535	1	0.0191505	0.4176	1	-0.132633	0.117844	0.679577	0.30496	0.669025	1	-0.101591	0.78237	1	0.0383586	0.342638	0.776293	0.301965
300811	BNIP2	BCL2/adenovirus E1B 19kDa interacting protein 2	0.261781	0.756654	-0.353065	0.0843381	0.379479	-0.264228	0.370288	0.778468	-0.21676	0.439753	0.804219	-0.12941	0.0854948	0.745898	-0.321764	0.516704	1	-0.159482	0.310976	0.828524	-0.221665	0.649101	1	-0.11757	0.0910089	0.5063	-0.310908	0.258153	0.69933	-0.242955
84480	BNIP3	BCL2/adenovirus E1B 19kDa interacting protein 3	0.824662	1	0.0606158	0.0599408	0.340009	0.91357	0.866773	1	-0.00750799	0.000336439	0.0210041	0.799902	0.474278	0.974302	0.167775	0.514389	1	0.261705	0.907116	1	-0.00386336	0.0384842	0.750579	0.671582	0.50191	0.945406	0.117901	0.0730663	0.458662	0.595857
140923	BNIP3L	BCL2/adenovirus E1B 19kDa interacting protein 3-like	0.935036	1	0.0179388	0.480507	0.762347	-0.17237	0.580567	0.930722	-0.0343632	0.705261	1	-0.0569945	0.432559	0.962785	0.123138	0.320415	1	-0.106831	0.735748	1	-0.0242405	0.821814	1	-0.0276517	0.57476	0.971048	0.0717707	0.166753	0.591488	-0.199327
361994	BNIPL	BCL2/adenovirus E1B 19kD interacting protein like	0.843773	1	0.0799105	0.141103	0.455802	0.448951	0.402823	0.807733	0.134851	0.0145481	0.153694	0.531227	0.711924	1	-0.149705	0.773109	1	-0.0791374	0.683028	1	0.0671981	0.467098	1	0.232911	0.975289	1	0.00776117	0.164873	0.588912	0.366737
287173	BOD1	biorientation of chromosomes in cell division 1	0.19161	0.702352	0.245128	0.124356	0.435003	0.302137	0.40142	0.806471	0.133979	0.143436	0.497195	0.290673	0.0657435	0.739543	0.221971	0.884671	1	0.104611	0.35504	0.862925	0.1412	0.953495	1	0.0456339	0.0698471	0.458836	0.222577	0.0735304	0.458662	0.388264
29884	BOK	BCL2-related ovarian killer	0.588908	0.961563	-0.242277	0.278439	0.60183	-0.316071	0.888162	1	-0.0736118	0.205501	0.593168	-0.188804	0.41234	0.962785	-0.351852	0.533186	1	-0.0994442	0.884816	1	-0.066625	0.0473473	0.750579	-0.365948	0.386481	0.851673	-0.317473	0.804866	1	-0.046206
365875	BOLA1	bolA homolog 1 (E. coli)	0.910459	1	0.0283916	0.41268	0.708159	-0.132392	0.233439	0.64007	0.377375	0.390462	0.764011	0.253643	0.283302	0.876077	-0.33463	0.189819	1	-0.388631	0.494513	0.950163	0.278442	0.749936	1	-0.0803094	0.576586	0.972192	-0.235802	0.880917	1	-0.0970789
297388	BOLA3	bolA homolog 3 (E. coli)	0.186137	0.700223	0.137713	0.459563	0.741202	0.125476	0.185926	0.584815	0.288646	0.0697691	0.357348	0.3903	0.630822	1	-0.105888	0.245013	1	-0.205928	0.323221	0.836933	0.247401	0.924612	1	0.058253	0.934124	1	-0.0487685	0.610887	0.95069	0.12868
501143	BOLL	bol, boule-like (Drosophila)	0.811042	1	-0.0935432	1	1	0	0.710022	1	-0.133778	1	1	0	0.865062	1	-0.102412	1	1	0	0.971995	1	-0.0379027	1	1	0	0.586342	0.977045	-0.134371	1	1	0
300050	BOP1	block of proliferation 1	0.0944714	0.626221	0.398511	0.0780981	0.368526	0.734817	0.0558983	0.361804	0.360107	0.0125369	0.141723	0.681746	0.415337	0.962785	0.127911	0.552956	1	0.157257	0.101047	0.662791	0.332897	0.299929	0.930419	0.357502	0.246987	0.711831	0.228287	0.0455448	0.39307	0.656983
306102	BORA	bora, aurora kinase A activator	0.194506	0.704324	-0.255939	0.905178	1	0.0124941	0.00710325	0.159219	-0.251818	0.620411	0.95023	0.0434101	0.615585	1	-0.0645986	0.691996	1	-0.057587	0.0661547	0.625024	-0.220175	0.552902	1	-0.0922155	0.263305	0.733413	-0.141237	0.480235	0.881775	0.0999839
296973	BPGM	2,3-bisphosphoglycerate mutase	0.721754	1	-0.0646889	0.246532	0.566675	-0.050547	0.536403	0.898843	-0.0521235	0.832404	1	-0.100603	0.803261	1	-0.0313148	0.937783	1	0.0375877	0.724853	1	-0.0297145	0.315045	0.93814	-0.203269	0.580817	0.973029	-0.0627872	0.490956	0.889333	0.131717
361239	BPHL	biphenyl hydrolase-like (serine hydrolase)	0.0122985	0.484351	-0.600268	0.0506469	0.32287	-0.283709	0.0977252	0.453622	-0.353048	0.0299296	0.228926	-0.337709	0.0373734	0.721469	-0.455671	0.950233	1	0.0118075	0.0955903	0.659425	-0.358147	0.017012	0.74747	-0.383194	0.0144445	0.285703	-0.511693	0.982453	1	-0.00914882
296321	BPI	bactericidal/permeability-increasing protein	0.422647	0.83352	0.174788	0.422647	0.708159	-0.186123	0.19768	0.595322	0.174788	0.395772	0.764011	-0.0930616	0.45421	0.962785	0.0873941	0.304546	1	-0.0930616	0.135389	0.680364	0.174788	0.572368	1	-0.0620411	0.536795	0.953214	0.0873941	0.101841	0.494263	-0.186123
246238	BPIFA1	BPI fold containing family A, member 1	0.359274	0.83352	0.274726	0.422647	0.708159	-0.16281	0.106186	0.468893	0.421538	0.621585	0.951258	-0.102466	0.869374	1	-0.00944868	0.573126	1	-0.0603436	0.526712	0.952018	0.203049	0.25222	0.894679	-0.220906	0.407569	0.867927	0.209041	0.934795	1	0.00382583
50585	BPIFA2	BPI fold containing family A, member 2	1	1	0	1	1	0	1	1	0	1	1	0	1	1	0	1	1	0	1	1	0	1	1	0	1	1	0	1	1	0
54303	Bpifa2f	BPI fold containing family A, member 2F	0.78895	1	-0.053838	0.201219	0.52004	-0.426013	0.380759	0.789024	-0.062836	0.00257878	0.0574075	-0.634343	0.647506	1	0.0483817	0.694788	1	0.0987164	0.711231	1	0.0544595	0.110663	0.757564	-0.448903	0.414243	0.874412	-0.113116	0.65048	0.975003	-0.155652
690402	BPIFA3	BPI fold containing family A, member 3	1	1	0	1	1	0	1	1	0	1	1	0	1	1	0	1	1	0	1	1	0	1	1	0	1	1	0	1	1	0
311559	Bpifa5	BPI fold containing family A, member 5	0.298767	0.790922	-0.259111	0.422648	0.708159	0.26012	0.557282	0.914396	0.204114	0.342055	0.734022	0.236476	0.124483	0.779366	-0.604282	0.940577	1	0.0236441	0.427107	0.904456	0.307342	0.948526	1	0.00747606	0.0617929	0.44421	-0.699842	0.294765	0.727936	0.339351
499926	BPIFB1	BPI fold containing family B, member 1	0.930362	1	0.0231387	0.43815	0.722263	-0.335804	0.605493	0.949323	0.0735598	0.160313	0.525026	-0.273792	0.704054	1	-0.13657	0.744086	1	-0.0227435	0.497702	0.952018	0.131193	0.448447	0.998865	-0.169927	0.590993	0.979524	-0.129058	0.294222	0.727486	-0.264722
296290	BPIFB2	BPI fold containing family B, member 2	0.422647	0.83352	0.191751	0.422649	0.708159	0.177817	0.25281	0.650829	0.0958757	0.479419	0.837642	0.100841	0.45421	0.962785	0.0958757	0.153367	1	0.165885	0.129883	0.680364	0.191751	0.355305	0.959297	0.100841	0.550415	0.953214	0.0639171	0.133138	0.542487	0.165885
499924	BPIFB3	BPI fold containing family B, member 3	1	1	0	0.422648	0.708159	0.26012	1	1	0	0.304546	0.693557	0.13006	1	1	0	0.395775	1	0.13006	1	1	0	0.101841	0.752639	0.26012	1	1	0	0.572368	0.923051	0.0867067
499925	BPIFB4	BPI fold containing family B, member 4	0.933338	1	0.0240115	0.395712	0.708159	0.191291	0.597686	0.943424	0.139314	0.58639	0.924993	0.158734	0.697463	1	-0.0134775	0.662087	1	0.036925	0.739259	1	-0.0377948	0.590843	1	0.133917	0.630483	1	0.103752	0.581237	0.929695	0.122593
311558	BPIFB6	BPI fold containing family B, member 6	1	1	0	1	1	0	1	1	0	1	1	0	1	1	0	1	1	0	1	1	0	1	1	0	1	1	0	1	1	0
299685	BPIFC	BPI fold containing family C	0.711115	1	-0.20084	0.0634569	0.345099	0.986232	0.740201	1	0.0342935	0.00124227	0.0385351	1.10486	0.254102	0.857365	-0.345681	0.871488	1	-0.0272141	0.881974	1	0.0752683	0.0459179	0.750579	0.942745	0.28654	0.761452	-0.379904	0.413883	0.827158	0.402701
64473	BPNT1	3'(2'), 5'-bisphosphate nucleotidase 1	0.00679407	0.471776	0.532823	0.0252049	0.285254	0.384081	0.0220665	0.248714	0.348494	0.00176972	0.0476873	0.352151	0.0577433	0.735325	0.372814	0.578351	1	0.0752275	0.0623456	0.62404	0.345504	0.0274452	0.74747	0.329568	0.00708057	0.241347	0.427756	0.309028	0.741545	0.196973
497672	BRCA1	breast cancer 1, early onset	0.0538589	0.590216	-0.38203	0.640294	0.915167	0.0466488	0.0689211	0.392838	-0.428532	0.703558	1	-0.0731211	0.766263	1	-0.0710913	0.604664	1	0.132414	0.0788954	0.646725	-0.429184	0.455504	0.999891	0.260211	0.571097	0.967933	-0.119388	0.55497	0.923051	-0.193798
360254	BRCA2	breast cancer 2, early onset	0.0181737	0.509491	-0.581934	0.123323	0.434013	-0.478431	0.0461856	0.339436	-0.365738	0.478269	0.837266	-0.143496	0.0354123	0.721469	-0.426911	0.0826197	1	-0.34163	0.0617693	0.623149	-0.36389	0.54896	1	-0.133901	0.00694937	0.2407	-0.48226	0.0241307	0.32166	-0.506238
[truncated: 15,703 more rows]
